# Supplementary material for: HLA-F regulates the proliferation of trophoblast via PKM2-dependent glycolysis in the pathogenesis of preeclampsia
Source: Mol Med. 2025 Apr 18;31:142. doi: 10.1186/s10020-025-01201-w (PMC12008859; doi:10.1186/s10020-025-01201-w)
Supplement: Supplementary file 2 — Supplementary Material 2 [file 10020_2025_1201_MOESM2_ESM.xlsx]

## Sheet: Sheet1
Supplementary table 2-patients information for IHC analysis of placenta decidua
	Normal control goup(NC)	Preeclampsia group
Number	12	12
Maternal age	29±3.6	30±3.6
Maternal body mass index at delivery	25.79±2.32	27.18±2.09
Gestational age at delivery (weeks)	39.18±0.81	35.38±2.07****
Gravidity	1.83±1.64	0.75±0.96
Parity	0.25±0.45	0.16±0.38
Data are given as arithmetic mean± standard deviation ****P value< 0.0001 compared to preeclampsia group
