# Supplementary material for: HLA-F regulates the proliferation of trophoblast via PKM2-dependent glycolysis in the pathogenesis of preeclampsia
Source: Mol Med. 2025 Apr 18;31:142. doi: 10.1186/s10020-025-01201-w (PMC12008859; doi:10.1186/s10020-025-01201-w)
Supplement: Supplementary file 3 — Supplementary Material 3 [file 10020_2025_1201_MOESM3_ESM.xlsx]

## Sheet: JAR_OEvsJAR_ctrl
Supplementary table 3-Differentially_expresssed _protein_annot
Protein accession	Protein description	Gene name	JAR_OE/JAR_ctrl Ratio	Regulated Type	MW [kDa]	Coverage [%]	Peptides	Unique peptides	Razor + unique peptides	LFQ intensity JAR_ctrl	LFQ intensity JAR_OE	JAR_ctrl	JAR_OE	Subcellular localization	KEGG KO No.	KEGG Gene	KEGG pathway	Biological Process	Cellular Component	Molecular Function	Pfam ID	Domain description	KOG category	KOG NO.	KOG description	WikiPathways	externalDetailsURL	Is_TF	Reactome pathway	Reactome link	HallMark	msigdbURL
A0A024RBG1	Diphosphoinositol polyphosphate phosphohydrolase NUDT4B OS=Homo sapiens OX=9606 GN=NUDT4B PE=3 SV=1	NUDT4B	0.930467	None	20.434	35.9	5	5	5	417790	388740	1.03602	0.963982	nucleus	K07766			GO:0006066 alcohol metabolic process; GO:0006139 nucleobase-containing compound metabolic process; GO:0006163 purine nucleotide metabolic process; GO:0006195 purine nucleotide catabolic process; GO:0006629 lipid metabolic process; GO:0006644 phospholipid metabolic process; GO:0006650 glycerophospholipid metabolic process; GO:0006725 cellular aromatic compound metabolic process; GO:0006753 nucleos…	GO:0005622 intracellular anatomical structure; GO:0005634 nucleus; GO:0005737 cytoplasm; GO:0005829 cytosol; GO:0043226 organelle; GO:0043227 membrane-bounded organelle; GO:0043229 intracellular organelle; GO:0043231 intracellular membrane-bounded organelle;	GO:0000298 endopolyphosphatase activity; GO:0003676 nucleic acid binding; GO:0003723 RNA binding; GO:0003824 catalytic activity; GO:0004551 nucleotide diphosphatase activity; GO:0005488 binding; GO:0008486 diphosphoinositol-polyphosphate diphosphatase activity; GO:0016462 pyrophosphatase activity; GO:0016787 hydrolase activity; GO:0016817 hydrolase activity, acting on acid anhydrides; GO:0016818 …	PF00293	PF00293 NUDIX domain	T	KOG2839	Diadenosine and diphosphoinositol polyphosphate phosphohydrolase						HEME METABOLISM	https://www.gsea-msigdb.org/gsea/msigdb/cards/HALLMARK_HEME_METABOLISM
A0A075B734	Aquaporin-7B OS=Homo sapiens OX=9606 GN=AQP7B PE=3 SV=1	AQP7B		None	37.977	2.6	1	1	1	0	0			plasma membrane	K08771	AQP7; aquaporin-7	hsa04923 Regulation of lipolysis in adipocytes; hsa03320 PPAR signaling pathway	GO:0000003 reproduction; GO:0003008 system process; GO:0003014 renal system process; GO:0003091 renal water homeostasis; GO:0003097 renal water transport; GO:0006091 generation of precursor metabolites and energy; GO:0006810 transport; GO:0006833 water transport; GO:0007276 gamete generation; GO:0007283 spermatogenesis; GO:0007588 excretion; GO:0008152 metabolic process; GO:0008643 carbohydrate t…	GO:0005622 intracellular anatomical structure; GO:0005737 cytoplasm; GO:0005886 plasma membrane; GO:0005887 integral component of plasma membrane; GO:0005903 brush border; GO:0005911 cell-cell junction; GO:0016020 membrane; GO:0016021 integral component of membrane; GO:0030054 cell junction; GO:0031224 intrinsic component of membrane; GO:0031226 intrinsic component of plasma membrane; GO:0031253 …	GO:0005215 transporter activity; GO:0005372 water transmembrane transporter activity; GO:0015144 carbohydrate transmembrane transporter activity; GO:0015166 polyol transmembrane transporter activity; GO:0015168 glycerol transmembrane transporter activity; GO:0015204 urea transmembrane transporter activity; GO:0015250 water channel activity; GO:0015254 glycerol channel activity; GO:0015265 urea ch…			G	KOG0224	Aquaporin (major intrinsic protein family)
P0DPI2	Glutamine amidotransferase-like class 1 domain-containing protein 3, mitochondrial OS=Homo sapiens OX=9606 GN=GATD3 PE=1 SV=1	GATD3	0.830216	None	28.17	48.1	8	8	8	517540	429670	1.09277	0.907233	mitochondria					GO:0005622 intracellular anatomical structure; GO:0005737 cytoplasm; GO:0005739 mitochondrion; GO:0043226 organelle; GO:0043227 membrane-bounded organelle; GO:0043229 intracellular organelle; GO:0043231 intracellular membrane-bounded organelle;
A0A804HLA8	Guanine nucleotide-binding protein G(I)/G(S)/G(O) subunit gamma-5B OS=Homo sapiens OX=9606 GN=GNG5B PE=3 SV=1	GNG5B		None	7.2512	39.7	1	1	1	662690	806610			extracellular							PF00631	PF00631 GGL domain	T	KOG4119	G protein gamma subunit
A0AV96	RNA-binding protein 47 OS=Homo sapiens OX=9606 GN=RBM47 PE=1 SV=2	RBM47	0.787522	None	64.098	43.2	15	15	15	545140	429310	1.11887	0.881133	nucleus	K25083			GO:0002244 hematopoietic progenitor cell differentiation; GO:0002376 immune system process; GO:0002520 immune system development; GO:0006139 nucleobase-containing compound metabolic process; GO:0006725 cellular aromatic compound metabolic process; GO:0006807 nitrogen compound metabolic process; GO:0007275 multicellular organism development; GO:0008152 metabolic process; GO:0009451 RNA modificatio…	GO:0005622 intracellular anatomical structure; GO:0005634 nucleus; GO:0005654 nucleoplasm; GO:0005737 cytoplasm; GO:0030895 apolipoprotein B mRNA editing enzyme complex; GO:0031974 membrane-enclosed lumen; GO:0031981 nuclear lumen; GO:0032991 protein-containing complex; GO:0043226 organelle; GO:0043227 membrane-bounded organelle; GO:0043229 intracellular organelle; GO:0043231 intracellular membra…	GO:0003676 nucleic acid binding; GO:0003723 RNA binding; GO:0003727 single-stranded RNA binding; GO:0005488 binding; GO:0097159 organic cyclic compound binding; GO:1901363 heterocyclic compound binding;	PF00076	PF00076 RNA recognition motif. (a.k.a. RRM, RBD, or RNP domain)	A	KOG0117	Heterogeneous nuclear ribonucleoprotein R (RRM superfamily)	WP3945 TYROBP CAUSAL NETWORK IN MICROGLIA	http://www.wikipathways.org/instance/WP3945_r116679
A0AVI4	E3 ubiquitin-protein ligase TM129 OS=Homo sapiens OX=9606 GN=TMEM129 PE=1 SV=1	TMEM129		None	40.463	7.2	2	2	2	0	0			plasma membrane	K22380			GO:0000209 protein polyubiquitination; GO:0006464 cellular protein modification process; GO:0006508 proteolysis; GO:0006511 ubiquitin-dependent protein catabolic process; GO:0006807 nitrogen compound metabolic process; GO:0006810 transport; GO:0006886 intracellular protein transport; GO:0006950 response to stress; GO:0008104 protein localization; GO:0008152 metabolic process; GO:0009056 catabolic…	GO:0005622 intracellular anatomical structure; GO:0005737 cytoplasm; GO:0005783 endoplasmic reticulum; GO:0005789 endoplasmic reticulum membrane; GO:0012505 endomembrane system; GO:0016020 membrane; GO:0031984 organelle subcompartment; GO:0042175 nuclear outer membrane-endoplasmic reticulum membrane network; GO:0043226 organelle; GO:0043227 membrane-bounded organelle; GO:0043229 intracellular org…	GO:0003824 catalytic activity; GO:0004842 ubiquitin-protein transferase activity; GO:0016740 transferase activity; GO:0019787 ubiquitin-like protein transferase activity; GO:0061630 ubiquitin protein ligase activity; GO:0061659 ubiquitin-like protein ligase activity; GO:0140096 catalytic activity, acting on a protein;			S	KOG3899	Uncharacterized conserved protein				R-HSA-392499 Metabolism of proteins;R-HSA-597592 Post-translational protein modification;R-HSA-8852135 Protein ubiquitination;R-HSA-8866654 E3 ubiquitin ligases ubiquitinate target proteins	https://reactome.org/PathwayBrowser/#/R-HSA-392499;https://reactome.org/PathwayBrowser/#/R-HSA-597592;https://reactome.org/PathwayBrowser/#/R-HSA-8852135;https://reactome.org/PathwayBrowser/#/R-HSA-8866654
A0AVT1	Ubiquitin-like modifier-activating enzyme 6 OS=Homo sapiens OX=9606 GN=UBA6 PE=1 SV=1	UBA6	1.01841	None	117.97	43.8	33	33	33	1031800	1050800	0.990877	1.00912	nucleus	K10699	UBE1L2; ubiquitin-activating enzyme E1-like protein 2 [EC:6.2.1.45]	hsa04120 Ubiquitin mediated proteolysis	GO:0003008 system process; GO:0006464 cellular protein modification process; GO:0006508 proteolysis; GO:0006511 ubiquitin-dependent protein catabolic process; GO:0006807 nitrogen compound metabolic process; GO:0006950 response to stress; GO:0006974 cellular response to DNA damage stimulus; GO:0007275 multicellular organism development; GO:0007399 nervous system development; GO:0007417 central ner…	GO:0005622 intracellular anatomical structure; GO:0005737 cytoplasm; GO:0005829 cytosol;	GO:0003824 catalytic activity; GO:0004839 ubiquitin activating enzyme activity; GO:0008641 ubiquitin-like modifier activating enzyme activity; GO:0016874 ligase activity; GO:0016877 ligase activity, forming carbon-sulfur bonds; GO:0019780 FAT10 activating enzyme activity;	PF00899; PF16190; PF16191; PF10585; PF09358	PF00899 ThiF family; PF16190 Ubiquitin-activating enzyme E1 FCCH domain; PF16191 Ubiquitin-activating enzyme E1 four-helix bundle; PF10585 Ubiquitin-activating enzyme, SCCH domain; PF09358 Ubiquitin fold domain	O	KOG2012	Ubiquitin activating enzyme UBA1				R-HSA-1280218 Adaptive Immune System;R-HSA-168256 Immune System;R-HSA-392499 Metabolism of proteins;R-HSA-597592 Post-translational protein modification;R-HSA-8852135 Protein ubiquitination;R-HSA-8866652 Synthesis of active ubiquitin: roles of E1 and E2 enzymes;R-HSA-983168 Antigen processing: Ubiquitination & Proteasome degradation;R-HSA-983169 Class I MHC mediated antigen processing & presentat…	https://reactome.org/PathwayBrowser/#/R-HSA-1280218;https://reactome.org/PathwayBrowser/#/R-HSA-168256;https://reactome.org/PathwayBrowser/#/R-HSA-392499;https://reactome.org/PathwayBrowser/#/R-HSA-597592;https://reactome.org/PathwayBrowser/#/R-HSA-8852135;https://reactome.org/PathwayBrowser/#/R-HSA-8866652;https://reactome.org/PathwayBrowser/#/R-HSA-983168;https://reactome.org/PathwayBrowser/#/R…
A0FGR8	Extended synaptotagmin-2 OS=Homo sapiens OX=9606 GN=ESYT2 PE=1 SV=1	ESYT2	0.884662	None	102.36	25.7	15	15	15	253950	224660	1.0612	0.938802	nucleus				GO:0001505 regulation of neurotransmitter levels; GO:0006810 transport; GO:0006836 neurotransmitter transport; GO:0006887 exocytosis; GO:0007154 cell communication; GO:0007267 cell-cell signaling; GO:0007268 chemical synaptic transmission; GO:0007269 neurotransmitter secretion; GO:0009987 cellular process; GO:0016079 synaptic vesicle exocytosis; GO:0016192 vesicle-mediated transport; GO:0017156 c…	GO:0005622 intracellular anatomical structure; GO:0005737 cytoplasm; GO:0005783 endoplasmic reticulum; GO:0005789 endoplasmic reticulum membrane; GO:0005886 plasma membrane; GO:0005887 integral component of plasma membrane; GO:0008021 synaptic vesicle; GO:0009898 cytoplasmic side of plasma membrane; GO:0012505 endomembrane system; GO:0016020 membrane; GO:0016021 integral component of membrane; GO…	GO:0005488 binding; GO:0005509 calcium ion binding; GO:0005515 protein binding; GO:0005543 phospholipid binding; GO:0005544 calcium-dependent phospholipid binding; GO:0008289 lipid binding; GO:0008429 phosphatidylethanolamine binding; GO:0031210 phosphatidylcholine binding; GO:0035091 phosphatidylinositol binding; GO:0042802 identical protein binding; GO:0043167 ion binding; GO:0043168 anion bind…	PF17047; PF00168	PF17047 Synaptotagmin-like mitochondrial-lipid-binding domain; PF00168 C2 domain	R	KOG1012	Ca2+-dependent lipid-binding protein CLB1/vesicle protein vp115/Granuphilin A, contains C2 domain				R-HSA-1430728 Metabolism;R-HSA-1660662 Glycosphingolipid metabolism;R-HSA-428157 Sphingolipid metabolism;R-HSA-556833 Metabolism of lipids	https://reactome.org/PathwayBrowser/#/R-HSA-1430728;https://reactome.org/PathwayBrowser/#/R-HSA-1660662;https://reactome.org/PathwayBrowser/#/R-HSA-428157;https://reactome.org/PathwayBrowser/#/R-HSA-556833
A0JLT2	Mediator of RNA polymerase II transcription subunit 19 OS=Homo sapiens OX=9606 GN=MED19 PE=1 SV=2	MED19		None	26.273	10.2	1	1	1	0	0			nucleus	K15137			GO:0006139 nucleobase-containing compound metabolic process; GO:0006351 transcription, DNA-templated; GO:0006355 regulation of transcription, DNA-templated; GO:0006357 regulation of transcription by RNA polymerase II; GO:0006366 transcription by RNA polymerase II; GO:0006725 cellular aromatic compound metabolic process; GO:0006807 nitrogen compound metabolic process; GO:0008152 metabolic process;…	GO:0005622 intracellular anatomical structure; GO:0005634 nucleus; GO:0005654 nucleoplasm; GO:0016592 mediator complex; GO:0016604 nuclear body; GO:0031974 membrane-enclosed lumen; GO:0031981 nuclear lumen; GO:0032991 protein-containing complex; GO:0043226 organelle; GO:0043227 membrane-bounded organelle; GO:0043229 intracellular organelle; GO:0043231 intracellular membrane-bounded organelle; GO:…	GO:0003712 transcription coregulator activity; GO:0005488 binding; GO:0005515 protein binding; GO:0008134 transcription factor binding; GO:0140110 transcription regulator activity;			S	KOG4043	Uncharacterized conserved protein				R-HSA-1266738 Developmental Biology;R-HSA-1430728 Metabolism;R-HSA-1989781 PPARA activates gene expression;R-HSA-381340 Transcriptional regulation of white adipocyte differentiation;R-HSA-400206 Regulation of lipid metabolism by PPARalpha;R-HSA-556833 Metabolism of lipids	https://reactome.org/PathwayBrowser/#/R-HSA-1266738;https://reactome.org/PathwayBrowser/#/R-HSA-1430728;https://reactome.org/PathwayBrowser/#/R-HSA-1989781;https://reactome.org/PathwayBrowser/#/R-HSA-381340;https://reactome.org/PathwayBrowser/#/R-HSA-400206;https://reactome.org/PathwayBrowser/#/R-HSA-556833
A0JNW5	Bridge-like lipid transfer protein family member 3B OS=Homo sapiens OX=9606 GN=BLTP3B PE=1 SV=2	BLTP3B	1.19646	None	164.2	12.1	11	11	11	2397400	2868400	0.910555	1.08945	plasma membrane					GO:0005622 intracellular anatomical structure; GO:0005737 cytoplasm; GO:0005768 endosome; GO:0005769 early endosome; GO:0005829 cytosol; GO:0012505 endomembrane system; GO:0031410 cytoplasmic vesicle; GO:0031982 vesicle; GO:0043226 organelle; GO:0043227 membrane-bounded organelle; GO:0043229 intracellular organelle; GO:0097708 intracellular vesicle;	GO:0005488 binding; GO:0005515 protein binding; GO:0019899 enzyme binding; GO:0042802 identical protein binding; GO:0042803 protein homodimerization activity; GO:0042826 histone deacetylase binding; GO:0046983 protein dimerization activity;			S	KOG2955	Uncharacterized conserved protein				R-HSA-162582 Signal Transduction;R-HSA-194315 Signaling by Rho GTPases;R-HSA-9012999 RHO GTPase cycle;R-HSA-9696270 RND2 GTPase cycle;R-HSA-9716542 Signaling by Rho GTPases, Miro GTPases and RHOBTB3	https://reactome.org/PathwayBrowser/#/R-HSA-162582;https://reactome.org/PathwayBrowser/#/R-HSA-194315;https://reactome.org/PathwayBrowser/#/R-HSA-9012999;https://reactome.org/PathwayBrowser/#/R-HSA-9696270;https://reactome.org/PathwayBrowser/#/R-HSA-9716542
A0MZ66	Shootin-1 OS=Homo sapiens OX=9606 GN=SHTN1 PE=1 SV=4	SHTN1	0.87759	None	71.639	39.1	21	21	21	612940	537910	1.0652	0.934805	nucleus				GO:0000902 cell morphogenesis; GO:0000904 cell morphogenesis involved in differentiation; GO:0001558 regulation of cell growth; GO:0006928 movement of cell or subcellular component; GO:0006929 substrate-dependent cell migration; GO:0006930 substrate-dependent cell migration, cell extension; GO:0006996 organelle organization; GO:0007010 cytoskeleton organization; GO:0007015 actin filament organiza…	GO:0005622 intracellular anatomical structure; GO:0005737 cytoplasm; GO:0005829 cytosol; GO:0005856 cytoskeleton; GO:0005874 microtubule; GO:0005875 microtubule associated complex; GO:0015630 microtubule cytoskeleton; GO:0030027 lamellipodium; GO:0030175 filopodium; GO:0030424 axon; GO:0030426 growth cone; GO:0030427 site of polarized growth; GO:0031252 cell leading edge; GO:0032991 protein-conta…	GO:0003779 actin binding; GO:0005488 binding; GO:0005515 protein binding; GO:0008092 cytoskeletal protein binding; GO:0019894 kinesin binding; GO:0044877 protein-containing complex binding; GO:0050839 cell adhesion molecule binding; GO:0051015 actin filament binding;									R-HSA-1266738 Developmental Biology;R-HSA-373760 L1CAM interactions;R-HSA-422475 Axon guidance;R-HSA-437239 Recycling pathway of L1;R-HSA-9675108 Nervous system development	https://reactome.org/PathwayBrowser/#/R-HSA-1266738;https://reactome.org/PathwayBrowser/#/R-HSA-373760;https://reactome.org/PathwayBrowser/#/R-HSA-422475;https://reactome.org/PathwayBrowser/#/R-HSA-437239;https://reactome.org/PathwayBrowser/#/R-HSA-9675108
A0PK00	Transmembrane protein 120B OS=Homo sapiens OX=9606 GN=TMEM120B PE=1 SV=1	TMEM120B		None	40.245	5	1	1	1	0	0			plasma membrane				GO:0009987 cellular process; GO:0016043 cellular component organization; GO:0022607 cellular component assembly; GO:0030154 cell differentiation; GO:0032502 developmental process; GO:0043933 protein-containing complex organization; GO:0044085 cellular component biogenesis; GO:0045444 fat cell differentiation; GO:0048869 cellular developmental process; GO:0051259 protein complex oligomerization; G…	GO:0005622 intracellular anatomical structure; GO:0005634 nucleus; GO:0005635 nuclear envelope; GO:0005637 nuclear inner membrane; GO:0012505 endomembrane system; GO:0016020 membrane; GO:0019866 organelle inner membrane; GO:0031090 organelle membrane; GO:0031965 nuclear membrane; GO:0031967 organelle envelope; GO:0031975 envelope; GO:0043226 organelle; GO:0043227 membrane-bounded organelle; GO:00…				R	KOG4758	Predicted membrane protein
A1A4S6	Rho GTPase-activating protein 10 OS=Homo sapiens OX=9606 GN=ARHGAP10 PE=1 SV=1	ARHGAP10	1.0386	None	89.374	13.1	7	7	7	91304	94828	0.981067	1.01893	nucleus	K13736	ARHGAP10; Rho GTPase-activating protein 10	hsa05100 Bacterial invasion of epithelial cells	GO:0006996 organelle organization; GO:0007010 cytoskeleton organization; GO:0007154 cell communication; GO:0007165 signal transduction; GO:0007264 small GTPase mediated signal transduction; GO:0007265 Ras protein signal transduction; GO:0007266 Rho protein signal transduction; GO:0007275 multicellular organism development; GO:0007399 nervous system development; GO:0009966 regulation of signal tra…	GO:0005622 intracellular anatomical structure; GO:0005737 cytoplasm; GO:0005829 cytosol; GO:0005886 plasma membrane; GO:0016020 membrane; GO:0048471 perinuclear region of cytoplasm; GO:0071944 cell periphery;	GO:0005096 GTPase activator activity; GO:0005488 binding; GO:0005515 protein binding; GO:0005543 phospholipid binding; GO:0008047 enzyme activator activity; GO:0008289 lipid binding; GO:0030234 enzyme regulator activity; GO:0030695 GTPase regulator activity; GO:0043167 ion binding; GO:0043168 anion binding; GO:0060589 nucleoside-triphosphatase regulator activity; GO:0098772 molecular function reg…	PF16746; PF00169; PF00620; PF14604	PF16746 BAR domain of APPL family; PF00169 PH domain; PF00620 RhoGAP domain; PF14604 Variant SH3 domain	T	KOG1451	Oligophrenin-1 and related Rho GTPase-activating proteins	WP2858 ECTODERM DIFFERENTIATION	http://www.wikipathways.org/instance/WP2858_r116763		R-HSA-109581 Apoptosis;R-HSA-162582 Signal Transduction;R-HSA-169911 Regulation of Apoptosis;R-HSA-194315 Signaling by Rho GTPases;R-HSA-211728 Regulation of PAK-2p34 activity by PS-GAP/RHG10;R-HSA-5357801 Programmed Cell Death;R-HSA-8980692 RHOA GTPase cycle;R-HSA-9012999 RHO GTPase cycle;R-HSA-9013148 CDC42 GTPase cycle;R-HSA-9013149 RAC1 GTPase cycle;R-HSA-9716542 Signaling by Rho GTPases, Mir…	https://reactome.org/PathwayBrowser/#/R-HSA-109581;https://reactome.org/PathwayBrowser/#/R-HSA-162582;https://reactome.org/PathwayBrowser/#/R-HSA-169911;https://reactome.org/PathwayBrowser/#/R-HSA-194315;https://reactome.org/PathwayBrowser/#/R-HSA-211728;https://reactome.org/PathwayBrowser/#/R-HSA-5357801;https://reactome.org/PathwayBrowser/#/R-HSA-8980692;https://reactome.org/PathwayBrowser/#/R-…	MITOTIC SPINDLE	https://www.gsea-msigdb.org/gsea/msigdb/cards/HALLMARK_MITOTIC_SPINDLE
A1KXE4	Myelin-associated neurite-outgrowth inhibitor OS=Homo sapiens OX=9606 GN=FAM168B PE=1 SV=1	FAM168B		None	20.324	9.2	1	1	1	0	0			mitochondria
A1L0T0	2-hydroxyacyl-CoA lyase 2 OS=Homo sapiens OX=9606 GN=ILVBL PE=1 SV=2	ILVBL	0.958062	None	67.867	30.2	12	12	12	273740	262260	1.02142	0.978582	endoplasmic reticulum	K11259			GO:0001501 skeletal system development; GO:0007275 multicellular organism development; GO:0009653 anatomical structure morphogenesis; GO:0009790 embryo development; GO:0009792 embryo development ending in birth or egg hatching; GO:0009887 animal organ morphogenesis; GO:0032501 multicellular organismal process; GO:0032502 developmental process; GO:0043009 chordate embryonic development; GO:0048513…	GO:0016020 membrane;		PF02776; PF00205; PF02775	PF02776 Thiamine pyrophosphate enzyme, N-terminal TPP binding domain; PF00205 Thiamine pyrophosphate enzyme, central domain; PF02775 Thiamine pyrophosphate enzyme, C-terminal TPP binding domain	EH	KOG1185	Thiamine pyrophosphate-requiring enzyme						HYPOXIA	https://www.gsea-msigdb.org/gsea/msigdb/cards/HALLMARK_HYPOXIA
A1L390	Pleckstrin homology domain-containing family G member 3 OS=Homo sapiens OX=9606 GN=PLEKHG3 PE=1 SV=1	PLEKHG3	1.17013	None	134.41	2.3	2	2	2	42209	49390	0.921604	1.0784	nucleus	K23859			GO:0002009 morphogenesis of an epithelium; GO:0002165 instar larval or pupal development; GO:0003002 regionalization; GO:0007275 multicellular organism development; GO:0007389 pattern specification process; GO:0007444 imaginal disc development; GO:0007472 wing disc morphogenesis; GO:0007474 imaginal disc-derived wing vein specification; GO:0007476 imaginal disc-derived wing morphogenesis; GO:0007…	GO:0005622 intracellular anatomical structure; GO:0005737 cytoplasm; GO:0043226 organelle; GO:0043228 non-membrane-bounded organelle; GO:0043229 intracellular organelle; GO:0043232 intracellular non-membrane-bounded organelle; GO:0043292 contractile fiber; GO:0055120 striated muscle dense body; GO:0099080 supramolecular complex; GO:0099081 supramolecular polymer; GO:0099512 supramolecular fiber;	GO:0005085 guanyl-nucleotide exchange factor activity; GO:0005488 binding; GO:0005515 protein binding; GO:0019899 enzyme binding; GO:0019904 protein domain specific binding; GO:0031267 small GTPase binding; GO:0051020 GTPase binding; GO:0098772 molecular function regulator;	PF00621; PF00169	PF00621 RhoGEF domain; PF00169 PH domain	R	KOG3518	Putative guanine nucleotide exchange factor				R-HSA-162582 Signal Transduction;R-HSA-194315 Signaling by Rho GTPases;R-HSA-8980692 RHOA GTPase cycle;R-HSA-9012999 RHO GTPase cycle;R-HSA-9013148 CDC42 GTPase cycle;R-HSA-9013149 RAC1 GTPase cycle;R-HSA-9013406 RHOQ GTPase cycle;R-HSA-9013408 RHOG GTPase cycle;R-HSA-9716542 Signaling by Rho GTPases, Miro GTPases and RHOBTB3	https://reactome.org/PathwayBrowser/#/R-HSA-162582;https://reactome.org/PathwayBrowser/#/R-HSA-194315;https://reactome.org/PathwayBrowser/#/R-HSA-8980692;https://reactome.org/PathwayBrowser/#/R-HSA-9012999;https://reactome.org/PathwayBrowser/#/R-HSA-9013148;https://reactome.org/PathwayBrowser/#/R-HSA-9013149;https://reactome.org/PathwayBrowser/#/R-HSA-9013406;https://reactome.org/PathwayBrowser/#…
A1X283	SH3 and PX domain-containing protein 2B OS=Homo sapiens OX=9606 GN=SH3PXD2B PE=1 SV=3	SH3PXD2B	1.06278	None	101.58	21	13	13	13	252940	268820	0.969565	1.03044	mitochondria	K24032			GO:0000003 reproduction; GO:0001501 skeletal system development; GO:0001503 ossification; GO:0001649 osteoblast differentiation; GO:0001654 eye development; GO:0002051 osteoblast fate commitment; GO:0006801 superoxide metabolic process; GO:0006996 organelle organization; GO:0007275 multicellular organism development; GO:0007423 sensory organ development; GO:0007507 heart development; GO:0008104 p…	GO:0002102 podosome; GO:0005622 intracellular anatomical structure; GO:0005737 cytoplasm; GO:0005856 cytoskeleton; GO:0015629 actin cytoskeleton; GO:0032991 protein-containing complex; GO:0043226 organelle; GO:0043228 non-membrane-bounded organelle; GO:0043229 intracellular organelle; GO:0043232 intracellular non-membrane-bounded organelle;	GO:0005488 binding; GO:0005515 protein binding; GO:0005543 phospholipid binding; GO:0008047 enzyme activator activity; GO:0008289 lipid binding; GO:0010314 phosphatidylinositol-5-phosphate binding; GO:0016176 superoxide-generating NADPH oxidase activator activity; GO:0019904 protein domain specific binding; GO:0030234 enzyme regulator activity; GO:0032266 phosphatidylinositol-3-phosphate binding;…	PF00787; PF00018; PF07653	PF00787 PX domain; PF00018 SH3 domain; PF07653 Variant SH3 domain	T	KOG0905	Phosphoinositide 3-kinase
A2RRP1	NBAS subunit of NRZ tethering complex OS=Homo sapiens OX=9606 GN=NBAS PE=1 SV=2	NBAS	0.767394	None	268.57	3	5	5	5	74611	57256	1.13161	0.86839	nucleus	K20473			GO:0000184 nuclear-transcribed mRNA catabolic process, nonsense-mediated decay; GO:0000956 nuclear-transcribed mRNA catabolic process; GO:0006139 nucleobase-containing compound metabolic process; GO:0006401 RNA catabolic process; GO:0006402 mRNA catabolic process; GO:0006725 cellular aromatic compound metabolic process; GO:0006807 nitrogen compound metabolic process; GO:0006810 transport; GO:0006…	GO:0005622 intracellular anatomical structure; GO:0005737 cytoplasm; GO:0005783 endoplasmic reticulum; GO:0005829 cytosol; GO:0012505 endomembrane system; GO:0032991 protein-containing complex; GO:0043226 organelle; GO:0043227 membrane-bounded organelle; GO:0043229 intracellular organelle; GO:0043231 intracellular membrane-bounded organelle; GO:0070939 Dsl1/NZR complex; GO:0099023 vesicle tetheri…	GO:0000149 SNARE binding; GO:0005488 binding; GO:0005515 protein binding;			S	KOG1797	Uncharacterized conserved protein (Neuroblastoma-amplified protein)				R-HSA-199991 Membrane Trafficking;R-HSA-5653656 Vesicle-mediated transport;R-HSA-6811434 COPI-dependent Golgi-to-ER retrograde traffic;R-HSA-6811442 Intra-Golgi and retrograde Golgi-to-ER traffic;R-HSA-8856688 Golgi-to-ER retrograde transport	https://reactome.org/PathwayBrowser/#/R-HSA-199991;https://reactome.org/PathwayBrowser/#/R-HSA-5653656;https://reactome.org/PathwayBrowser/#/R-HSA-6811434;https://reactome.org/PathwayBrowser/#/R-HSA-6811442;https://reactome.org/PathwayBrowser/#/R-HSA-8856688
A3KMH1	von Willebrand factor A domain-containing protein 8 OS=Homo sapiens OX=9606 GN=VWA8 PE=1 SV=2	VWA8	1.03438	None	214.82	12.3	17	17	17	116920	120940	0.983099	1.0169	mitochondria	K24512				GO:0005622 intracellular anatomical structure; GO:0005737 cytoplasm; GO:0005739 mitochondrion; GO:0043226 organelle; GO:0043227 membrane-bounded organelle; GO:0043229 intracellular organelle; GO:0043231 intracellular membrane-bounded organelle;	GO:0003824 catalytic activity; GO:0016462 pyrophosphatase activity; GO:0016787 hydrolase activity; GO:0016817 hydrolase activity, acting on acid anhydrides; GO:0016818 hydrolase activity, acting on acid anhydrides, in phosphorus-containing anhydrides; GO:0016887 ATP hydrolysis activity; GO:0017111 nucleoside-triphosphatase activity;	PF07728	PF07728 AAA domain (dynein-related subfamily)	R	KOG1808	AAA ATPase containing von Willebrand factor type A (vWA) domain
A3KN83	Protein strawberry notch homolog 1 OS=Homo sapiens OX=9606 GN=SBNO1 PE=1 SV=1	SBNO1	1.37368	None	154.31	18.4	19	19	19	112290	154250	0.842575	1.15742	nucleus				GO:0001775 cell activation; GO:0002237 response to molecule of bacterial origin; GO:0002252 immune effector process; GO:0002263 cell activation involved in immune response; GO:0002274 myeloid leukocyte activation; GO:0002275 myeloid cell activation involved in immune response; GO:0002281 macrophage activation involved in immune response; GO:0002366 leukocyte activation involved in immune response…			PF13872; PF13871	PF13872 P-loop containing NTP hydrolase pore-1; PF13871 C-terminal domain on Strawberry notch homologue	KT	KOG1513	Nuclear helicase MOP-3/SNO (DEAD-box superfamily)
A4D1E9	GTP-binding protein 10 OS=Homo sapiens OX=9606 GN=GTPBP10 PE=1 SV=1	GTPBP10	0.965933	None	42.932	32.3	9	9	9	114480	110580	1.01733	0.982671	cytoplasm					GO:0005622 intracellular anatomical structure; GO:0005634 nucleus; GO:0005730 nucleolus; GO:0031974 membrane-enclosed lumen; GO:0031981 nuclear lumen; GO:0043226 organelle; GO:0043227 membrane-bounded organelle; GO:0043228 non-membrane-bounded organelle; GO:0043229 intracellular organelle; GO:0043231 intracellular membrane-bounded organelle; GO:0043232 intracellular non-membrane-bounded organelle…		PF01018	PF01018 GTP1/OBG	R	KOG1489	Predicted GTP-binding protein (ODN superfamily)
A4D1P6	WD repeat-containing protein 91 OS=Homo sapiens OX=9606 GN=WDR91 PE=1 SV=2	WDR91		None	83.343	2.4	1	1	1	0	0			nucleus	K24760			GO:0006810 transport; GO:0006950 response to stress; GO:0009611 response to wounding; GO:0009894 regulation of catabolic process; GO:0016192 vesicle-mediated transport; GO:0016482 cytosolic transport; GO:0019216 regulation of lipid metabolic process; GO:0019220 regulation of phosphate metabolic process; GO:0019222 regulation of metabolic process; GO:0031323 regulation of cellular metabolic proces…	GO:0005622 intracellular anatomical structure; GO:0005737 cytoplasm; GO:0005768 endosome; GO:0005769 early endosome; GO:0005770 late endosome; GO:0005829 cytosol; GO:0010008 endosome membrane; GO:0012505 endomembrane system; GO:0016020 membrane; GO:0019898 extrinsic component of membrane; GO:0031090 organelle membrane; GO:0031312 extrinsic component of organelle membrane; GO:0031313 extrinsic com…	GO:0019207 kinase regulator activity; GO:0030234 enzyme regulator activity; GO:0035014 phosphatidylinositol 3-kinase regulator activity; GO:0098772 molecular function regulator;			S	KOG1333	Uncharacterized conserved protein				R-HSA-162582 Signal Transduction;R-HSA-194315 Signaling by Rho GTPases;R-HSA-9012999 RHO GTPase cycle;R-HSA-9013148 CDC42 GTPase cycle;R-HSA-9716542 Signaling by Rho GTPases, Miro GTPases and RHOBTB3	https://reactome.org/PathwayBrowser/#/R-HSA-162582;https://reactome.org/PathwayBrowser/#/R-HSA-194315;https://reactome.org/PathwayBrowser/#/R-HSA-9012999;https://reactome.org/PathwayBrowser/#/R-HSA-9013148;https://reactome.org/PathwayBrowser/#/R-HSA-9716542
A4D2P6	Delphilin OS=Homo sapiens OX=9606 GN=GRID2IP PE=3 SV=2	GRID2IP		None	132.27	0.9	1	1	1	0	0			nucleus				GO:0006996 organelle organization; GO:0007010 cytoskeleton organization; GO:0007154 cell communication; GO:0007165 signal transduction; GO:0007166 cell surface receptor signaling pathway; GO:0007186 G protein-coupled receptor signaling pathway; GO:0007215 glutamate receptor signaling pathway; GO:0007216 G protein-coupled glutamate receptor signaling pathway; GO:0009987 cellular process; GO:001064…	GO:0005886 plasma membrane; GO:0016020 membrane; GO:0030425 dendrite; GO:0036477 somatodendritic compartment; GO:0042995 cell projection; GO:0043005 neuron projection; GO:0043197 dendritic spine; GO:0044309 neuron spine; GO:0045202 synapse; GO:0045211 postsynaptic membrane; GO:0071944 cell periphery; GO:0097060 synaptic membrane; GO:0097447 dendritic tree; GO:0098590 plasma membrane region; GO:00…		PF00595	PF00595 PDZ domain	T	KOG3589	G protein signaling regulators
A4FU49	SH3 domain-containing protein 21 OS=Homo sapiens OX=9606 GN=SH3D21 PE=2 SV=2	SH3D21		None	70.518	2.2	1	1	1	0	0			nucleus	K23715				GO:0005622 intracellular anatomical structure; GO:0005634 nucleus; GO:0005654 nucleoplasm; GO:0005886 plasma membrane; GO:0016020 membrane; GO:0031974 membrane-enclosed lumen; GO:0031981 nuclear lumen; GO:0043226 organelle; GO:0043227 membrane-bounded organelle; GO:0043229 intracellular organelle; GO:0043231 intracellular membrane-bounded organelle; GO:0043233 organelle lumen; GO:0070013 intracel…		PF07653	PF07653 Variant SH3 domain	T	KOG4348	Adaptor protein CMS/SETA
A5D8V6	Vacuolar protein sorting-associated protein 37C OS=Homo sapiens OX=9606 GN=VPS37C PE=1 SV=2	VPS37C	0.807782	None	38.658	9	2	2	2	162420	131200	1.10633	0.893672	nucleus	K12185	VPS37; ESCRT-I complex subunit VPS37	hsa04144 Endocytosis	GO:0006810 transport; GO:0006914 autophagy; GO:0006996 organelle organization; GO:0007032 endosome organization; GO:0008152 metabolic process; GO:0009056 catabolic process; GO:0009987 cellular process; GO:0010256 endomembrane system organization; GO:0016032 viral process; GO:0016043 cellular component organization; GO:0016050 vesicle organization; GO:0016192 vesicle-mediated transport; GO:0016197…	GO:0000813 ESCRT I complex; GO:0005622 intracellular anatomical structure; GO:0005737 cytoplasm; GO:0005768 endosome; GO:0010008 endosome membrane; GO:0012505 endomembrane system; GO:0016020 membrane; GO:0031090 organelle membrane; GO:0031410 cytoplasmic vesicle; GO:0031982 vesicle; GO:0032991 protein-containing complex; GO:0036452 ESCRT complex; GO:0043226 organelle; GO:0043227 membrane-bounded …	GO:0005488 binding; GO:0005515 protein binding; GO:0048306 calcium-dependent protein binding;	PF07200	PF07200 Modifier of rudimentary (Mod(r)) protein	S	KOG3270	Uncharacterized conserved protein	WP4932 7Q1123 COPY NUMBER VARIATION SYNDROME	http://www.wikipathways.org/instance/WP4932_r118797		R-HSA-162587 HIV Life Cycle;R-HSA-162588 Budding and maturation of HIV virion;R-HSA-162599 Late Phase of HIV Life Cycle;R-HSA-162906 HIV Infection;R-HSA-1643685 Disease;R-HSA-174490 Membrane binding and targetting of GAG proteins;R-HSA-174495 Synthesis And Processing Of GAG, GAGPOL Polyproteins;R-HSA-175474 Assembly Of The HIV Virion;R-HSA-199991 Membrane Trafficking;R-HSA-5653656 Vesicle-mediate…	https://reactome.org/PathwayBrowser/#/R-HSA-162587;https://reactome.org/PathwayBrowser/#/R-HSA-162588;https://reactome.org/PathwayBrowser/#/R-HSA-162599;https://reactome.org/PathwayBrowser/#/R-HSA-162906;https://reactome.org/PathwayBrowser/#/R-HSA-1643685;https://reactome.org/PathwayBrowser/#/R-HSA-174490;https://reactome.org/PathwayBrowser/#/R-HSA-174495;https://reactome.org/PathwayBrowser/#/R-H…
A5PLL7	Plasmanylethanolamine desaturase OS=Homo sapiens OX=9606 GN=PEDS1 PE=1 SV=3	PEDS1		None	31.135	9.6	2	2	2	0	0			plasma membrane	K20656	TMEM189; plasmanylethanolamine desaturase [EC:1.14.19.77]	hsa00565 Ether lipid metabolism; hsa01100 Metabolic pathways	GO:0006464 cellular protein modification process; GO:0006807 nitrogen compound metabolic process; GO:0008152 metabolic process; GO:0009987 cellular process; GO:0016567 protein ubiquitination; GO:0019538 protein metabolic process; GO:0032446 protein modification by small protein conjugation; GO:0036211 protein modification process; GO:0043170 macromolecule metabolic process; GO:0043412 macromolecu…	GO:0005622 intracellular anatomical structure; GO:0005737 cytoplasm; GO:0005783 endoplasmic reticulum; GO:0012505 endomembrane system; GO:0016020 membrane; GO:0016021 integral component of membrane; GO:0031224 intrinsic component of membrane; GO:0043226 organelle; GO:0043227 membrane-bounded organelle; GO:0043229 intracellular organelle; GO:0043231 intracellular membrane-bounded organelle;	GO:0003824 catalytic activity; GO:0004842 ubiquitin-protein transferase activity; GO:0005488 binding; GO:0005515 protein binding; GO:0016491 oxidoreductase activity; GO:0016740 transferase activity; GO:0019787 ubiquitin-like protein transferase activity; GO:0019899 enzyme binding; GO:0031625 ubiquitin protein ligase binding; GO:0044389 ubiquitin-like protein ligase binding; GO:0061630 ubiquitin p…	PF10520	PF10520 Lipid desaturase domain	O	KOG3011	Ubiquitin-conjugating enzyme
A5PLN9	Trafficking protein particle complex subunit 13 OS=Homo sapiens OX=9606 GN=TRAPPC13 PE=1 SV=2	TRAPPC13	1.00801	None	46.523	33.6	9	9	9	48564	48953	0.996011	1.00399	cytoplasm	K20310			GO:0065007 biological regulation; GO:0065009 regulation of molecular function;	GO:0005622 intracellular anatomical structure; GO:0005737 cytoplasm; GO:0005829 cytosol;	GO:0005085 guanyl-nucleotide exchange factor activity; GO:0005488 binding; GO:0005515 protein binding; GO:0019899 enzyme binding; GO:0031267 small GTPase binding; GO:0051020 GTPase binding; GO:0098772 molecular function regulator;			S	KOG2625	Uncharacterized conserved protein				R-HSA-199991 Membrane Trafficking;R-HSA-5653656 Vesicle-mediated transport;R-HSA-8876198 RAB GEFs exchange GTP for GDP on RABs;R-HSA-9007101 Rab regulation of trafficking	https://reactome.org/PathwayBrowser/#/R-HSA-199991;https://reactome.org/PathwayBrowser/#/R-HSA-5653656;https://reactome.org/PathwayBrowser/#/R-HSA-8876198;https://reactome.org/PathwayBrowser/#/R-HSA-9007101
A5YKK6	CCR4-NOT transcription complex subunit 1 OS=Homo sapiens OX=9606 GN=CNOT1 PE=1 SV=2	CNOT1	1.13695	None	266.94	20.5	37	37	37	248770	282840	0.935912	1.06409	cytoplasm	K12604	CNOT1; CCR4-NOT transcription complex subunit 1	hsa03018 RNA degradation	GO:0000003 reproduction; GO:0000075 cell cycle checkpoint signaling; GO:0000077 DNA damage checkpoint signaling; GO:0000122 negative regulation of transcription by RNA polymerase II; GO:0000226 microtubule cytoskeleton organization; GO:0000278 mitotic cell cycle; GO:0000288 nuclear-transcribed mRNA catabolic process, deadenylation-dependent decay; GO:0000289 nuclear-transcribed mRNA poly(A) tail …	GO:0000932 P-body; GO:0005622 intracellular anatomical structure; GO:0005737 cytoplasm; GO:0005829 cytosol; GO:0030014 CCR4-NOT complex; GO:0030015 CCR4-NOT core complex; GO:0032991 protein-containing complex; GO:0035770 ribonucleoprotein granule; GO:0036464 cytoplasmic ribonucleoprotein granule; GO:0043226 organelle; GO:0043228 non-membrane-bounded organelle; GO:0043229 intracellular organelle; …	GO:0000175 3'-5'-exoribonuclease activity; GO:0003824 catalytic activity; GO:0004518 nuclease activity; GO:0004527 exonuclease activity; GO:0004532 exoribonuclease activity; GO:0004535 poly(A)-specific ribonuclease activity; GO:0004540 ribonuclease activity; GO:0005102 signaling receptor binding; GO:0005198 structural molecule activity; GO:0005488 binding; GO:0005515 protein binding; GO:0008134 t…	PF16418; PF16417; PF16415; PF12842	PF16418 CCR4-NOT transcription complex subunit 1 HEAT repeat; PF16417 CCR4-NOT transcription complex subunit 1 TTP binding domain; PF16415 CCR4-NOT transcription complex subunit 1 CAF1-binding domain; PF12842 CCR4-Not complex, Not1 subunit, domain of unknown function DUF3819	K	KOG1831	Negative regulator of transcription	WP4352 CILIARY LANDSCAPE	http://www.wikipathways.org/instance/WP4352_r102218		R-HSA-212436 Generic Transcription Pathway;R-HSA-3700989 Transcriptional Regulation by TP53;R-HSA-429914 Deadenylation-dependent mRNA decay;R-HSA-429947 Deadenylation of mRNA;R-HSA-6791312 TP53 Regulates Transcription of Cell Cycle Genes;R-HSA-6804115 TP53 regulates transcription of additional cell cycle genes whose exact role in the p53 pathway remain uncertain;R-HSA-73857 RNA Polymerase II Tran…	https://reactome.org/PathwayBrowser/#/R-HSA-212436;https://reactome.org/PathwayBrowser/#/R-HSA-3700989;https://reactome.org/PathwayBrowser/#/R-HSA-429914;https://reactome.org/PathwayBrowser/#/R-HSA-429947;https://reactome.org/PathwayBrowser/#/R-HSA-6791312;https://reactome.org/PathwayBrowser/#/R-HSA-6804115;https://reactome.org/PathwayBrowser/#/R-HSA-73857;https://reactome.org/PathwayBrowser/#/R-…
A6NCE7	Microtubule-associated proteins 1A/1B light chain 3 beta 2 OS=Homo sapiens OX=9606 GN=MAP1LC3B2 PE=1 SV=1	MAP1LC3B2	1.38841	None	14.628	16.8	2	2	2	139130	193170	0.837376	1.16262	cytoplasm	K10435	MAP1LC; microtubule-associated protein 1 light chain	hsa04216 Ferroptosis; hsa04140 Autophagy - animal; hsa04371 Apelin signaling pathway; hsa05131 Shigellosis; hsa04621 NOD-like receptor signaling pathway; hsa04137 Mitophagy - animal; hsa05022 Pathways of neurodegeneration - multiple diseases; hsa05167 Kaposi sarcoma-associated herpesvirus infection; hsa05014 Amyotrophic lateral sclerosis	GO:0000045 autophagosome assembly; GO:0000422 autophagy of mitochondrion; GO:0006914 autophagy; GO:0006950 response to stress; GO:0006995 cellular response to nitrogen starvation; GO:0006996 organelle organization; GO:0007005 mitochondrion organization; GO:0007033 vacuole organization; GO:0007154 cell communication; GO:0008152 metabolic process; GO:0009056 catabolic process; GO:0009267 cellular r…	GO:0000323 lytic vacuole; GO:0000421 autophagosome membrane; GO:0005622 intracellular anatomical structure; GO:0005737 cytoplasm; GO:0005739 mitochondrion; GO:0005764 lysosome; GO:0005767 secondary lysosome; GO:0005773 vacuole; GO:0005774 vacuolar membrane; GO:0005776 autophagosome; GO:0005829 cytosol; GO:0005856 cytoskeleton; GO:0005875 microtubule associated complex; GO:0005929 cilium; GO:00059…	GO:0005488 binding; GO:0005515 protein binding; GO:0008017 microtubule binding; GO:0008092 cytoskeletal protein binding; GO:0015631 tubulin binding; GO:0019899 enzyme binding; GO:0019904 protein domain specific binding; GO:0031625 ubiquitin protein ligase binding; GO:0044389 ubiquitin-like protein ligase binding;	PF02991	PF02991 Autophagy protein Atg8 ubiquitin like	Z	KOG1654	Microtubule-associated anchor protein involved in autophagy and membrane trafficking
A6NCS6	Uncharacterized protein C2orf72 OS=Homo sapiens OX=9606 GN=C2orf72 PE=1 SV=2	C2orf72	0.607922	Down	30.48	31.2	6	6	6	94976	57738	1.24384	0.756159	nucleus
A6ND36	Protein FAM83G OS=Homo sapiens OX=9606 GN=FAM83G PE=1 SV=2	FAM83G	1.02772	None	90.834	6.7	3	3	3	44264	45491	0.986329	1.01367	nucleus	K23930			GO:0006355 regulation of transcription, DNA-templated; GO:0006357 regulation of transcription by RNA polymerase II; GO:0007154 cell communication; GO:0007165 signal transduction; GO:0007166 cell surface receptor signaling pathway; GO:0007167 enzyme linked receptor protein signaling pathway; GO:0007178 transmembrane receptor protein serine/threonine kinase signaling pathway; GO:0009719 response to…	GO:0005622 intracellular anatomical structure; GO:0005634 nucleus; GO:0005737 cytoplasm; GO:0005829 cytosol; GO:0043226 organelle; GO:0043227 membrane-bounded organelle; GO:0043229 intracellular organelle; GO:0043231 intracellular membrane-bounded organelle;
A6NDB9	Paralemmin-3 OS=Homo sapiens OX=9606 GN=PALM3 PE=1 SV=2	PALM3	1.07456	None	71.695	25.4	12	12	12	179720	193120	0.96406	1.03594	nucleus				GO:0001959 regulation of cytokine-mediated signaling pathway; GO:0001960 negative regulation of cytokine-mediated signaling pathway; GO:0002237 response to molecule of bacterial origin; GO:0007154 cell communication; GO:0007165 signal transduction; GO:0007166 cell surface receptor signaling pathway; GO:0008063 Toll signaling pathway; GO:0009605 response to external stimulus; GO:0009607 response t…
A6NDG6	Glycerol-3-phosphate phosphatase OS=Homo sapiens OX=9606 GN=PGP PE=1 SV=1	PGP	1.17493	None	34.006	37.4	9	9	9	568340	667760	0.91957	1.08043	extracellular	K19269	PGP; phosphoglycolate phosphatase [EC:3.1.3.18 3.1.3.48]	hsa01200 Carbon metabolism; hsa00630 Glyoxylate and dicarboxylate metabolism; hsa01100 Metabolic pathways	GO:0005975 carbohydrate metabolic process; GO:0006066 alcohol metabolic process; GO:0006071 glycerol metabolic process; GO:0006109 regulation of carbohydrate metabolic process; GO:0006111 regulation of gluconeogenesis; GO:0006114 glycerol biosynthetic process; GO:0006464 cellular protein modification process; GO:0006470 protein dephosphorylation; GO:0006629 lipid metabolic process; GO:0006644 pho…	GO:0005622 intracellular anatomical structure; GO:0005634 nucleus; GO:0005737 cytoplasm; GO:0005829 cytosol; GO:0043226 organelle; GO:0043227 membrane-bounded organelle; GO:0043229 intracellular organelle; GO:0043231 intracellular membrane-bounded organelle;	GO:0000287 magnesium ion binding; GO:0003824 catalytic activity; GO:0004035 alkaline phosphatase activity; GO:0004721 phosphoprotein phosphatase activity; GO:0004725 protein tyrosine phosphatase activity; GO:0005488 binding; GO:0008967 phosphoglycolate phosphatase activity; GO:0016787 hydrolase activity; GO:0016788 hydrolase activity, acting on ester bonds; GO:0016791 phosphatase activity; GO:004…	PF13344; PF13242	PF13344 Haloacid dehalogenase-like hydrolase; PF13242 HAD-hyrolase-like	P	KOG2882	p-Nitrophenyl phosphatase				R-HSA-1430728 Metabolism;R-HSA-70171 Glycolysis;R-HSA-70326 Glucose metabolism;R-HSA-71387 Metabolism of carbohydrates	https://reactome.org/PathwayBrowser/#/R-HSA-1430728;https://reactome.org/PathwayBrowser/#/R-HSA-70171;https://reactome.org/PathwayBrowser/#/R-HSA-70326;https://reactome.org/PathwayBrowser/#/R-HSA-71387
A6NDU8	RAB7A-interacting MON1-CCZ1 complex subunit 1 OS=Homo sapiens OX=9606 GN=RIMOC1 PE=1 SV=1	RIMOC1	0.980295	None	33.62	35.7	7	7	7	200460	196510	1.00995	0.99005	extracellular					GO:0005622 intracellular anatomical structure; GO:0005634 nucleus; GO:0005654 nucleoplasm; GO:0005737 cytoplasm; GO:0005829 cytosol; GO:0031974 membrane-enclosed lumen; GO:0031981 nuclear lumen; GO:0043226 organelle; GO:0043227 membrane-bounded organelle; GO:0043229 intracellular organelle; GO:0043231 intracellular membrane-bounded organelle; GO:0043233 organelle lumen; GO:0070013 intracellular o…
A6NED2	RCC1 domain-containing protein 1 OS=Homo sapiens OX=9606 GN=RCCD1 PE=1 SV=1	RCCD1	0.858002	None	40.078	14.9	4	4	4	76191	65372	1.07643	0.923575	nucleus					GO:0005622 intracellular anatomical structure; GO:0005737 cytoplasm; GO:0005829 cytosol; GO:0005886 plasma membrane; GO:0016020 membrane; GO:0071944 cell periphery;				S	KOG1426	FOG: RCC1 domain
A6NHL2	Tubulin alpha chain-like 3 OS=Homo sapiens OX=9606 GN=TUBAL3 PE=1 SV=2	TUBAL3		None	49.908	9.9	6	1	1	0	0			cytoskeleton	K07374	TUBA; tubulin alpha	hsa05016 Huntington disease; hsa04540 Gap junction; hsa04530 Tight junction; hsa05012 Parkinson disease; hsa05010 Alzheimer disease; hsa05132 Salmonella infection; hsa04145 Phagosome; hsa05130 Pathogenic Escherichia coli infection; hsa04210 Apoptosis; hsa05022 Pathways of neurodegeneration - multiple diseases; hsa05014 Amyotrophic lateral sclerosis; hsa05020 Prion disease				PF00091; PF03953	PF00091 Tubulin/FtsZ family, GTPase domain; PF03953 Tubulin C-terminal domain	Z	KOG1376	Alpha tubulin	WP5124 ALZHEIMERS DISEASE;WP2059 ALZHEIMERS DISEASE AND MIRNA EFFECTS;WP2359 PARKINUBIQUITIN PROTEASOMAL SYSTEM PATHWAY;WP2272 PATHOGENIC ESCHERICHIA COLI INFECTION	http://www.wikipathways.org/instance/WP5124_r119432;http://www.wikipathways.org/instance/WP2059_r119468;http://www.wikipathways.org/instance/WP2359_r119918;http://www.wikipathways.org/instance/WP2272_r118427		R-HSA-109582 Hemostasis;R-HSA-112314 Neurotransmitter receptors and postsynaptic signal transmission;R-HSA-112315 Transmission across Chemical Synapses;R-HSA-112316 Neuronal System;R-HSA-1266738 Developmental Biology;R-HSA-1280218 Adaptive Immune System;R-HSA-1445148 Translocation of SLC2A4 (GLUT4) to the plasma membrane;R-HSA-157858 Gap junction trafficking and regulation;R-HSA-162582 Signal Tra…
A6NHQ2	rRNA/tRNA 2'-O-methyltransferase fibrillarin-like protein 1 OS=Homo sapiens OX=9606 GN=FBLL1 PE=3 SV=2	FBLL1		None	34.803	11.1	3	1	1	0	0			nucleus	K14563	NOP1; rRNA 2'-O-methyltransferase fibrillarin [EC:2.1.1.-]	hsa03008 Ribosome biogenesis in eukaryotes	GO:0000154 rRNA modification; GO:0000494 box C/D RNA 3'-end processing; GO:0001510 RNA methylation; GO:0006139 nucleobase-containing compound metabolic process; GO:0006325 chromatin organization; GO:0006364 rRNA processing; GO:0006396 RNA processing; GO:0006464 cellular protein modification process; GO:0006479 protein methylation; GO:0006725 cellular aromatic compound metabolic process; GO:000680…	GO:0001650 fibrillar center; GO:0005622 intracellular anatomical structure; GO:0005634 nucleus; GO:0005654 nucleoplasm; GO:0005730 nucleolus; GO:0005732 sno(s)RNA-containing ribonucleoprotein complex; GO:0015030 Cajal body; GO:0016604 nuclear body; GO:0030684 preribosome; GO:0031428 box C/D RNP complex; GO:0031974 membrane-enclosed lumen; GO:0031981 nuclear lumen; GO:0032040 small-subunit process…	GO:0003676 nucleic acid binding; GO:0003723 RNA binding; GO:0003824 catalytic activity; GO:0005488 binding; GO:0008168 methyltransferase activity; GO:0008170 N-methyltransferase activity; GO:0008173 RNA methyltransferase activity; GO:0008276 protein methyltransferase activity; GO:0008649 rRNA methyltransferase activity; GO:0008757 S-adenosylmethionine-dependent methyltransferase activity; GO:0016…	PF01269	PF01269 Fibrillarin	A	KOG1596	Fibrillarin and related nucleolar RNA-binding proteins
A6NHR9	Structural maintenance of chromosomes flexible hinge domain-containing protein 1 OS=Homo sapiens OX=9606 GN=SMCHD1 PE=1 SV=2	SMCHD1	0.963116	None	226.37	23.8	33	33	33	284680	274180	1.01879	0.981212	cytoplasm	K23113			GO:0007275 multicellular organism development; GO:0007423 sensory organ development; GO:0007549 dosage compensation; GO:0009048 dosage compensation by inactivation of X chromosome; GO:0010468 regulation of gene expression; GO:0019222 regulation of metabolic process; GO:0032501 multicellular organismal process; GO:0032502 developmental process; GO:0040029 regulation of gene expression, epigenetic;…	GO:0000228 nuclear chromosome; GO:0000803 sex chromosome; GO:0000805 X chromosome; GO:0001740 Barr body; GO:0005622 intracellular anatomical structure; GO:0005634 nucleus; GO:0005694 chromosome; GO:0031974 membrane-enclosed lumen; GO:0031981 nuclear lumen; GO:0043226 organelle; GO:0043227 membrane-bounded organelle; GO:0043228 non-membrane-bounded organelle; GO:0043229 intracellular organelle; GO…	GO:0003824 catalytic activity; GO:0016462 pyrophosphatase activity; GO:0016787 hydrolase activity; GO:0016817 hydrolase activity, acting on acid anhydrides; GO:0016818 hydrolase activity, acting on acid anhydrides, in phosphorus-containing anhydrides; GO:0016887 ATP hydrolysis activity; GO:0017111 nucleoside-triphosphatase activity;	PF13589; PF06470	PF13589 Histidine kinase-, DNA gyrase B-, and HSP90-like ATPase; PF06470 SMC proteins Flexible Hinge Domain						Transcription factor
A6NHX0	Cytosolic arginine sensor for mTORC1 subunit 2 OS=Homo sapiens OX=9606 GN=CASTOR2 PE=1 SV=3	CASTOR2		None	36.056	4.9	1	1	1	0	0			cytoplasm	K23081	CASTOR2; cytosolic arginine sensor for mTORC1 subunit 2	hsa04150 mTOR signaling pathway	GO:0009966 regulation of signal transduction; GO:0009968 negative regulation of signal transduction; GO:0010646 regulation of cell communication; GO:0010648 negative regulation of cell communication; GO:0023051 regulation of signaling; GO:0023057 negative regulation of signaling; GO:0032006 regulation of TOR signaling; GO:0032007 negative regulation of TOR signaling; GO:0048519 negative regulatio…	GO:0005622 intracellular anatomical structure; GO:0005737 cytoplasm; GO:0005829 cytosol;	GO:0005488 binding; GO:0005515 protein binding; GO:0042802 identical protein binding;	PF18700; PF13840	PF18700 Cytosolic arginine sensor for mTORC1 subunit 1 N-terminal domain; PF13840 ACT domain							R-HSA-2262752 Cellular responses to stress;R-HSA-8953897 Cellular responses to stimuli;R-HSA-9639288 Amino acids regulate mTORC1;R-HSA-9711097 Cellular response to starvation	https://reactome.org/PathwayBrowser/#/R-HSA-2262752;https://reactome.org/PathwayBrowser/#/R-HSA-8953897;https://reactome.org/PathwayBrowser/#/R-HSA-9639288;https://reactome.org/PathwayBrowser/#/R-HSA-9711097
A6NIH7	Protein unc-119 homolog B OS=Homo sapiens OX=9606 GN=UNC119B PE=1 SV=1	UNC119B	0.997695	None	28.136	21.9	3	3	3	41641	41545	1.00115	0.998846	cytoplasm	K23539			GO:0000003 reproduction; GO:0001558 regulation of cell growth; GO:0002119 nematode larval development; GO:0002164 larval development; GO:0006810 transport; GO:0006996 organelle organization; GO:0007275 multicellular organism development; GO:0007399 nervous system development; GO:0007610 behavior; GO:0007631 feeding behavior; GO:0007635 chemosensory behavior; GO:0008104 protein localization; GO:00…	GO:0005622 intracellular anatomical structure; GO:0005737 cytoplasm; GO:0005829 cytosol; GO:0005929 cilium; GO:0030424 axon; GO:0035869 ciliary transition zone; GO:0042995 cell projection; GO:0043005 neuron projection; GO:0043226 organelle; GO:0120025 plasma membrane bounded cell projection;	GO:0005488 binding; GO:0005515 protein binding; GO:0008289 lipid binding;			UT	KOG4037	Photoreceptor synaptic vesicle protein HRG4/UNC-119				R-HSA-1852241 Organelle biogenesis and maintenance;R-HSA-5617833 Cilium Assembly;R-HSA-5620920 Cargo trafficking to the periciliary membrane;R-HSA-5624138 Trafficking of myristoylated proteins to the cilium	https://reactome.org/PathwayBrowser/#/R-HSA-1852241;https://reactome.org/PathwayBrowser/#/R-HSA-5617833;https://reactome.org/PathwayBrowser/#/R-HSA-5620920;https://reactome.org/PathwayBrowser/#/R-HSA-5624138
A6NJ78	12S rRNA N4-methylcytidine (m4C) methyltransferase OS=Homo sapiens OX=9606 GN=METTL15 PE=1 SV=1	METTL15	1.06441	None	46.121	9.3	3	3	3	38366	40837	0.968802	1.0312	nucleus	K25876			GO:0000154 rRNA modification; GO:0001510 RNA methylation; GO:0006139 nucleobase-containing compound metabolic process; GO:0006364 rRNA processing; GO:0006396 RNA processing; GO:0006725 cellular aromatic compound metabolic process; GO:0006807 nitrogen compound metabolic process; GO:0008152 metabolic process; GO:0009451 RNA modification; GO:0009987 cellular process; GO:0010467 gene expression; GO:0…		GO:0003824 catalytic activity; GO:0008168 methyltransferase activity; GO:0008170 N-methyltransferase activity; GO:0008173 RNA methyltransferase activity; GO:0008649 rRNA methyltransferase activity; GO:0008757 S-adenosylmethionine-dependent methyltransferase activity; GO:0016434 rRNA (cytosine) methyltransferase activity; GO:0016740 transferase activity; GO:0016741 transferase activity, transferri…			R	KOG2782	Putative SAM dependent methyltransferases
A6NKD9	Coiled-coil domain-containing protein 85C OS=Homo sapiens OX=9606 GN=CCDC85C PE=1 SV=1	CCDC85C	1.1813	None	45.209	15.8	4	4	4	96411	113890	0.916886	1.08311	nucleus				GO:0007275 multicellular organism development; GO:0007399 nervous system development; GO:0007417 central nervous system development; GO:0007420 brain development; GO:0009892 negative regulation of metabolic process; GO:0009987 cellular process; GO:0010468 regulation of gene expression; GO:0010605 negative regulation of macromolecule metabolic process; GO:0010608 posttranscriptional regulation of …	GO:0005911 cell-cell junction; GO:0030054 cell junction; GO:0043296 apical junction complex;	GO:0005488 binding; GO:0005515 protein binding;			S	KOG3819	Uncharacterized conserved proteins (Hepatitis delta antigen-interacting protein A)
P0DN87	Choriogonadotropin subunit beta 7 OS=Homo sapiens OX=9606 GN=CGB7 PE=2 SV=1	CGB7	0.888048	None	17.757	28.5	3	3	3	202230	179590	1.05929	0.940705	extracellular	K10045			GO:0000003 reproduction; GO:0006810 transport; GO:0006869 lipid transport; GO:0006915 apoptotic process; GO:0007154 cell communication; GO:0007165 signal transduction; GO:0007186 G protein-coupled receptor signaling pathway; GO:0007267 cell-cell signaling; GO:0007276 gamete generation; GO:0007292 female gamete generation; GO:0008219 cell death; GO:0009719 response to endogenous stimulus; GO:00097…	GO:0005576 extracellular region; GO:0005615 extracellular space; GO:0005622 intracellular anatomical structure; GO:0005737 cytoplasm;	GO:0005102 signaling receptor binding; GO:0005179 hormone activity; GO:0005488 binding; GO:0005515 protein binding; GO:0030545 signaling receptor regulator activity; GO:0048018 receptor ligand activity; GO:0098772 molecular function regulator;	PF00007	PF00007 Cystine-knot domain
A6NKT7	RanBP2-like and GRIP domain-containing protein 3 OS=Homo sapiens OX=9606 GN=RGPD3 PE=3 SV=2	RGPD3		None	197.48	15.6	20	1	1	0	0			nucleus	K24044			GO:0000082 G1/S transition of mitotic cell cycle; GO:0000226 microtubule cytoskeleton organization; GO:0000278 mitotic cell cycle; GO:0006109 regulation of carbohydrate metabolic process; GO:0006111 regulation of gluconeogenesis; GO:0006403 RNA localization; GO:0006405 RNA export from nucleus; GO:0006406 mRNA export from nucleus; GO:0006464 cellular protein modification process; GO:0006508 proteo…	GO:0005622 intracellular anatomical structure; GO:0005634 nucleus; GO:0005635 nuclear envelope; GO:0005642 annulate lamellae; GO:0005643 nuclear pore; GO:0005737 cytoplasm; GO:0005739 mitochondrion; GO:0005813 centrosome; GO:0005815 microtubule organizing center; GO:0005829 cytosol; GO:0005856 cytoskeleton; GO:0012505 endomembrane system; GO:0015630 microtubule cytoskeleton; GO:0016020 membrane; …	GO:0003824 catalytic activity; GO:0005488 binding; GO:0005515 protein binding; GO:0016740 transferase activity; GO:0019787 ubiquitin-like protein transferase activity; GO:0019789 SUMO transferase activity; GO:0019899 enzyme binding; GO:0031267 small GTPase binding; GO:0051020 GTPase binding; GO:0140096 catalytic activity, acting on a protein;	PF00638; PF16704	PF00638 RanBP1 domain; PF16704 Rab binding domain	U	KOG0864	Ran-binding protein RANBP1 and related RanBD domain proteins
A8CG34	Nuclear envelope pore membrane protein POM 121C OS=Homo sapiens OX=9606 GN=POM121C PE=1 SV=3	POM121C	1.24536	None	125.09	8.8	6	6	6	129400	161150	0.890724	1.10928	plasma membrane	K14316	POM121; nuclear pore complex protein Nup121	hsa03013 Nucleocytoplasmic transport; hsa05014 Amyotrophic lateral sclerosis	GO:0006403 RNA localization; GO:0006405 RNA export from nucleus; GO:0006406 mRNA export from nucleus; GO:0006606 protein import into nucleus; GO:0006611 protein export from nucleus; GO:0006810 transport; GO:0006886 intracellular protein transport; GO:0006913 nucleocytoplasmic transport; GO:0006996 organelle organization; GO:0006997 nucleus organization; GO:0006999 nuclear pore organization; GO:00…	GO:0005622 intracellular anatomical structure; GO:0005634 nucleus; GO:0005635 nuclear envelope; GO:0005643 nuclear pore; GO:0005654 nucleoplasm; GO:0012505 endomembrane system; GO:0016020 membrane; GO:0031090 organelle membrane; GO:0031965 nuclear membrane; GO:0031967 organelle envelope; GO:0031974 membrane-enclosed lumen; GO:0031975 envelope; GO:0031981 nuclear lumen; GO:0032991 protein-containi…	GO:0005048 signal sequence binding; GO:0005198 structural molecule activity; GO:0005488 binding; GO:0008139 nuclear localization sequence binding; GO:0017056 structural constituent of nuclear pore; GO:0033218 amide binding; GO:0042277 peptide binding;									R-HSA-1169408 ISG15 antiviral mechanism;R-HSA-1169410 Antiviral mechanism by IFN-stimulated genes;R-HSA-1280215 Cytokine Signaling in Immune system;R-HSA-1430728 Metabolism;R-HSA-159227 Transport of the SLBP independent Mature mRNA;R-HSA-159230 Transport of the SLBP Dependant Mature mRNA;R-HSA-159231 Transport of Mature mRNA Derived from an Intronless Transcript;R-HSA-159234 Transport of Mature m…
A8MPP1	Putative ATP-dependent RNA helicase DDX11-like protein 8 OS=Homo sapiens OX=9606 GN=DDX11L8 PE=1 SV=1	DDX11L8		None	101.81	13.8	9	1	1	0	0			cytoplasm				GO:0000819 sister chromatid segregation; GO:0006139 nucleobase-containing compound metabolic process; GO:0006259 DNA metabolic process; GO:0006260 DNA replication; GO:0006261 DNA-dependent DNA replication; GO:0006282 regulation of DNA repair; GO:0006325 chromatin organization; GO:0006351 transcription, DNA-templated; GO:0006355 regulation of transcription, DNA-templated; GO:0006356 regulation of …	GO:0000228 nuclear chromosome; GO:0000785 chromatin; GO:0000922 spindle pole; GO:0001650 fibrillar center; GO:0005576 extracellular region; GO:0005615 extracellular space; GO:0005622 intracellular anatomical structure; GO:0005634 nucleus; GO:0005654 nucleoplasm; GO:0005694 chromosome; GO:0005730 nucleolus; GO:0005813 centrosome; GO:0005815 microtubule organizing center; GO:0005819 spindle; GO:000…	GO:0003676 nucleic acid binding; GO:0003677 DNA binding; GO:0003678 DNA helicase activity; GO:0003682 chromatin binding; GO:0003688 DNA replication origin binding; GO:0003690 double-stranded DNA binding; GO:0003697 single-stranded DNA binding; GO:0003723 RNA binding; GO:0003727 single-stranded RNA binding; GO:0003824 catalytic activity; GO:0004386 helicase activity; GO:0005488 binding; GO:0008094…	PF13307	PF13307 Helicase C-terminal domain	L	KOG1133	Helicase of the DEAD superfamily
A8MT69	Centromere protein X OS=Homo sapiens OX=9606 GN=CENPX PE=1 SV=1	CENPX		None	8.9593	17.3	1	1	1	0	0			cytoplasm	K15360	STRA13; centromere protein X	hsa03460 Fanconi anemia pathway	GO:0000003 reproduction; GO:0000280 nuclear division; GO:0000712 resolution of meiotic recombination intermediates; GO:0006139 nucleobase-containing compound metabolic process; GO:0006259 DNA metabolic process; GO:0006260 DNA replication; GO:0006261 DNA-dependent DNA replication; GO:0006281 DNA repair; GO:0006310 DNA recombination; GO:0006323 DNA packaging; GO:0006325 chromatin organization; GO:0…	GO:0005622 intracellular anatomical structure; GO:0005634 nucleus; GO:0005654 nucleoplasm; GO:0031974 membrane-enclosed lumen; GO:0031981 nuclear lumen; GO:0032991 protein-containing complex; GO:0043226 organelle; GO:0043227 membrane-bounded organelle; GO:0043229 intracellular organelle; GO:0043231 intracellular membrane-bounded organelle; GO:0043233 organelle lumen; GO:0043240 Fanconi anaemia nu…	GO:0003676 nucleic acid binding; GO:0003677 DNA binding; GO:0003690 double-stranded DNA binding; GO:0005488 binding; GO:0097159 organic cyclic compound binding; GO:1901363 heterocyclic compound binding;	PF09415	PF09415 CENP-S associating Centromere protein X				WP4946 DNA REPAIR PATHWAYS FULL NETWORK	http://www.wikipathways.org/instance/WP4946_r117703		R-HSA-1640170 Cell Cycle;R-HSA-606279 Deposition of new CENPA-containing nucleosomes at the centromere;R-HSA-6783310 Fanconi Anemia Pathway;R-HSA-73886 Chromosome Maintenance;R-HSA-73894 DNA Repair;R-HSA-774815 Nucleosome assembly	https://reactome.org/PathwayBrowser/#/R-HSA-1640170;https://reactome.org/PathwayBrowser/#/R-HSA-606279;https://reactome.org/PathwayBrowser/#/R-HSA-6783310;https://reactome.org/PathwayBrowser/#/R-HSA-73886;https://reactome.org/PathwayBrowser/#/R-HSA-73894;https://reactome.org/PathwayBrowser/#/R-HSA-774815
P62308	Small nuclear ribonucleoprotein G OS=Homo sapiens OX=9606 GN=SNRPG PE=1 SV=1	SNRPG	0.761166	None	8.496	25	2	2	2	1894200	1441800	1.13561	0.864388	cytoplasm	K11099	SNRPG; small nuclear ribonucleoprotein G	hsa03040 Spliceosome	GO:0000245 spliceosomal complex assembly; GO:0000375 RNA splicing, via transesterification reactions; GO:0000377 RNA splicing, via transesterification reactions with bulged adenosine as nucleophile; GO:0000387 spliceosomal snRNP assembly; GO:0000398 mRNA splicing, via spliceosome; GO:0006139 nucleobase-containing compound metabolic process; GO:0006351 transcription, DNA-templated; GO:0006353 DNA-…	GO:0005622 intracellular anatomical structure; GO:0005634 nucleus; GO:0005654 nucleoplasm; GO:0005681 spliceosomal complex; GO:0005682 U5 snRNP; GO:0005683 U7 snRNP; GO:0005684 U2-type spliceosomal complex; GO:0005685 U1 snRNP; GO:0005686 U2 snRNP; GO:0005687 U4 snRNP; GO:0005689 U12-type spliceosomal complex; GO:0005737 cytoplasm; GO:0005829 cytosol; GO:0030532 small nuclear ribonucleoprotein co…	GO:0003676 nucleic acid binding; GO:0003723 RNA binding; GO:0005488 binding; GO:0043021 ribonucleoprotein complex binding; GO:0044877 protein-containing complex binding; GO:0070990 snRNP binding; GO:0097159 organic cyclic compound binding; GO:1901363 heterocyclic compound binding; GO:1990446 U1 snRNP binding;	PF01423	PF01423 LSM domain	A	KOG1780	Small Nuclear ribonucleoprotein G	WP411 MRNA PROCESSING	http://www.wikipathways.org/instance/WP411_r117160		R-HSA-111367 SLBP independent Processing of Histone Pre-mRNAs;R-HSA-1643685 Disease;R-HSA-191859 snRNP Assembly;R-HSA-194441 Metabolism of non-coding RNA;R-HSA-5663205 Infectious disease;R-HSA-72163 mRNA Splicing - Major Pathway;R-HSA-72165 mRNA Splicing - Minor Pathway;R-HSA-72172 mRNA Splicing;R-HSA-72203 Processing of Capped Intron-Containing Pre-mRNA;R-HSA-73856 RNA Polymerase II Transcriptio…	https://reactome.org/PathwayBrowser/#/R-HSA-111367;https://reactome.org/PathwayBrowser/#/R-HSA-1643685;https://reactome.org/PathwayBrowser/#/R-HSA-191859;https://reactome.org/PathwayBrowser/#/R-HSA-194441;https://reactome.org/PathwayBrowser/#/R-HSA-5663205;https://reactome.org/PathwayBrowser/#/R-HSA-72163;https://reactome.org/PathwayBrowser/#/R-HSA-72165;https://reactome.org/PathwayBrowser/#/R-HS…	MYC TARGETS V1	https://www.gsea-msigdb.org/gsea/msigdb/cards/HALLMARK_MYC_TARGETS_V1
A9UHW6	MIF4G domain-containing protein OS=Homo sapiens OX=9606 GN=MIF4GD PE=1 SV=1	MIF4GD		None	25.423	7.7	1	1	1	0	0			cytoplasm					GO:0005622 intracellular anatomical structure; GO:0005634 nucleus; GO:0005730 nucleolus; GO:0005737 cytoplasm; GO:0005829 cytosol; GO:0031974 membrane-enclosed lumen; GO:0031981 nuclear lumen; GO:0043226 organelle; GO:0043227 membrane-bounded organelle; GO:0043228 non-membrane-bounded organelle; GO:0043229 intracellular organelle; GO:0043231 intracellular membrane-bounded organelle; GO:0043232 in…	GO:0005488 binding; GO:0005515 protein binding; GO:0008022 protein C-terminus binding;			J	KOG3942	MIF4G domain-containing protein
B2RUZ4	Small integral membrane protein 1 OS=Homo sapiens OX=9606 GN=SMIM1 PE=1 SV=1	SMIM1		None	8.749	15.4	1	1	1	0	0			plasma membrane
B7ZAP0	Rab GTPase-activating protein 1-like, isoform 10 OS=Homo sapiens OX=9606 GN=RABGAP1L PE=1 SV=1	RABGAP1L	1.05468	None	29.038	23.7	5	4	4	403270	425320	0.973389	1.02661	cytoplasm									R	KOG1102	Rab6 GTPase activator GAPCenA and related TBC domain proteins						IL2 STAT5 SIGNALING;KRAS SIGNALING UP	https://www.gsea-msigdb.org/gsea/msigdb/cards/HALLMARK_IL2_STAT5_SIGNALING;https://www.gsea-msigdb.org/gsea/msigdb/cards/HALLMARK_KRAS_SIGNALING_UP
P0CG08	Golgi pH regulator B OS=Homo sapiens OX=9606 GN=GPR89B PE=1 SV=1	GPR89B	0.972314	None	52.916	8.6	3	3	3	145200	141180	1.01404	0.985963	plasma membrane	K22193			GO:0006810 transport; GO:0006811 ion transport; GO:0006820 anion transport; GO:0006873 cellular ion homeostasis; GO:0006885 regulation of pH; GO:0006996 organelle organization; GO:0007030 Golgi organization; GO:0007275 multicellular organism development; GO:0009987 cellular process; GO:0010256 endomembrane system organization; GO:0015698 inorganic anion transport; GO:0016043 cellular component or…	GO:0000139 Golgi membrane; GO:0005622 intracellular anatomical structure; GO:0005737 cytoplasm; GO:0005783 endoplasmic reticulum; GO:0005794 Golgi apparatus; GO:0005795 Golgi stack; GO:0005798 Golgi-associated vesicle; GO:0012505 endomembrane system; GO:0016020 membrane; GO:0016021 integral component of membrane; GO:0030660 Golgi-associated vesicle membrane; GO:0031090 organelle membrane; GO:0031…	GO:0005215 transporter activity; GO:0005216 ion channel activity; GO:0005244 voltage-gated ion channel activity; GO:0005253 anion channel activity; GO:0008308 voltage-gated anion channel activity; GO:0008509 anion transmembrane transporter activity; GO:0015075 ion transmembrane transporter activity; GO:0015103 inorganic anion transmembrane transporter activity; GO:0015267 channel activity; GO:001…			T	KOG2417	Predicted G-protein coupled receptor
P0DOY3	Immunoglobulin lambda constant 3 OS=Homo sapiens OX=9606 GN=IGLC3 PE=1 SV=1	IGLC3		None	11.265	14.2	1	1	1	0	0			extracellular				GO:0002250 adaptive immune response; GO:0002252 immune effector process; GO:0002253 activation of immune response; GO:0002376 immune system process; GO:0002429 immune response-activating cell surface receptor signaling pathway; GO:0002431 Fc receptor mediated stimulatory signaling pathway; GO:0002433 immune response-regulating cell surface receptor signaling pathway involved in phagocytosis; GO:0…	GO:0005576 extracellular region; GO:0005615 extracellular space; GO:0005886 plasma membrane; GO:0009897 external side of plasma membrane; GO:0009986 cell surface; GO:0016020 membrane; GO:0019814 immunoglobulin complex; GO:0032991 protein-containing complex; GO:0042571 immunoglobulin complex, circulating; GO:0071944 cell periphery; GO:0072562 blood microparticle; GO:0098552 side of membrane;	GO:0003823 antigen binding; GO:0003824 catalytic activity; GO:0004175 endopeptidase activity; GO:0004252 serine-type endopeptidase activity; GO:0005102 signaling receptor binding; GO:0005488 binding; GO:0005515 protein binding; GO:0008233 peptidase activity; GO:0008236 serine-type peptidase activity; GO:0016787 hydrolase activity; GO:0017171 serine hydrolase activity; GO:0034987 immunoglobulin re…	PF07654	PF07654 Immunoglobulin C1-set domain							R-HSA-109582 Hemostasis;R-HSA-1280218 Adaptive Immune System;R-HSA-1643685 Disease;R-HSA-166658 Complement cascade;R-HSA-166663 Initial triggering of complement;R-HSA-166786 Creation of C4 and C2 activators;R-HSA-168249 Innate Immune System;R-HSA-168256 Immune System;R-HSA-173623 Classical antibody-mediated complement activation;R-HSA-198933 Immunoregulatory interactions between a Lymphoid and a …	https://reactome.org/PathwayBrowser/#/R-HSA-109582;https://reactome.org/PathwayBrowser/#/R-HSA-1280218;https://reactome.org/PathwayBrowser/#/R-HSA-1643685;https://reactome.org/PathwayBrowser/#/R-HSA-166658;https://reactome.org/PathwayBrowser/#/R-HSA-166663;https://reactome.org/PathwayBrowser/#/R-HSA-166786;https://reactome.org/PathwayBrowser/#/R-HSA-168249;https://reactome.org/PathwayBrowser/#/R-…
C4AMC7	Putative WAS protein family homolog 3 OS=Homo sapiens OX=9606 GN=WASH3P PE=1 SV=2	WASH3P	0.905253	None	49.994	12.3	4	4	4	76530	69279	1.04973	0.950271	cytoplasm,nucleus	K18461	WASH1; WAS protein family homolog 1	hsa04144 Endocytosis	GO:0006810 transport; GO:0006887 exocytosis; GO:0006996 organelle organization; GO:0007010 cytoskeleton organization; GO:0007015 actin filament organization; GO:0008064 regulation of actin polymerization or depolymerization; GO:0009892 negative regulation of metabolic process; GO:0009894 regulation of catabolic process; GO:0009895 negative regulation of catabolic process; GO:0009987 cellular proc…	GO:0005622 intracellular anatomical structure; GO:0005737 cytoplasm; GO:0005768 endosome; GO:0005769 early endosome; GO:0005773 vacuole; GO:0005776 autophagosome; GO:0012505 endomembrane system; GO:0031410 cytoplasmic vesicle; GO:0031982 vesicle; GO:0032991 protein-containing complex; GO:0042995 cell projection; GO:0043226 organelle; GO:0043227 membrane-bounded organelle; GO:0043229 intracellular…	GO:0005488 binding; GO:0005515 protein binding; GO:0008092 cytoskeletal protein binding; GO:0015631 tubulin binding; GO:0019899 enzyme binding; GO:0031625 ubiquitin protein ligase binding; GO:0043014 alpha-tubulin binding; GO:0044389 ubiquitin-like protein ligase binding;	PF11945	PF11945 WAHD domain of WASH complex	O	KOG1366	Alpha-macroglobulin
C9J7I0	UBAP1-MVB12-associated (UMA)-domain containing protein 1 OS=Homo sapiens OX=9606 GN=UMAD1 PE=1 SV=2	UMAD1		None	15.2	21.9	2	2	2	0	0			cytoplasm,nucleus
C9JLW8	Mapk-regulated corepressor-interacting protein 1 OS=Homo sapiens OX=9606 GN=MCRIP1 PE=1 SV=1	MCRIP1	0.765158	None	10.92	29.9	2	2	2	241950	185130	1.13304	0.866957	nucleus				GO:0010717 regulation of epithelial to mesenchymal transition; GO:0045595 regulation of cell differentiation; GO:0050789 regulation of biological process; GO:0050793 regulation of developmental process; GO:0050794 regulation of cellular process; GO:0051239 regulation of multicellular organismal process; GO:0065007 biological regulation; GO:2000026 regulation of multicellular organismal developmen…	GO:0005622 intracellular anatomical structure; GO:0005634 nucleus; GO:0005737 cytoplasm; GO:0010494 cytoplasmic stress granule; GO:0032991 protein-containing complex; GO:0035770 ribonucleoprotein granule; GO:0036464 cytoplasmic ribonucleoprotein granule; GO:0043226 organelle; GO:0043227 membrane-bounded organelle; GO:0043228 non-membrane-bounded organelle; GO:0043229 intracellular organelle; GO:0…
E9PAV3	Nascent polypeptide-associated complex subunit alpha, muscle-specific form OS=Homo sapiens OX=9606 GN=NACA PE=1 SV=1	NACA	1.03477	None	205.42	3.4	5	5	5	4524200	4681500	0.982913	1.01709	nucleus				GO:0000003 reproduction; GO:0000122 negative regulation of transcription by RNA polymerase II; GO:0002376 immune system process; GO:0002520 immune system development; GO:0003006 developmental process involved in reproduction; GO:0003205 cardiac chamber development; GO:0003231 cardiac ventricle development; GO:0006355 regulation of transcription, DNA-templated; GO:0006357 regulation of transcripti…	GO:0005622 intracellular anatomical structure; GO:0005634 nucleus; GO:0005737 cytoplasm; GO:0005854 nascent polypeptide-associated complex; GO:0032991 protein-containing complex; GO:0043226 organelle; GO:0043227 membrane-bounded organelle; GO:0043229 intracellular organelle; GO:0043231 intracellular membrane-bounded organelle;	GO:0003712 transcription coregulator activity; GO:0003713 transcription coactivator activity; GO:0005488 binding; GO:0005515 protein binding; GO:0008134 transcription factor binding; GO:0017025 TBP-class protein binding; GO:0140110 transcription regulator activity;	PF19026	PF19026 HYPK UBA domain	K	KOG2239	Transcription factor containing NAC and TS-N domains
E9PRG8	Uncharacterized protein C11orf98 OS=Homo sapiens OX=9606 GN=C11orf98 PE=4 SV=2	C11orf98	1.08273	None	14.234	21.1	3	3	3	372680	403510	0.96028	1.03972	nucleus
L0R6Q1	SLC35A4 upstream open reading frame protein OS=Homo sapiens OX=9606 GN=SLC35A4 PE=3 SV=1	SLC35A4	0.990836	None	11.133	45.6	4	4	4	224800	222740	1.0046	0.995397	cytoplasm
M5A8F1	Suppressyn OS=Homo sapiens OX=9606 GN=ERVH48-1 PE=1 SV=1	ERVH48-1	0.622989	Down	18.128	39.4	5	5	5	640300	398900	1.23229	0.767706	extracellular
O00115	Deoxyribonuclease-2-alpha OS=Homo sapiens OX=9606 GN=DNASE2 PE=1 SV=2	DNASE2	0.88743	None	39.58	12.2	4	4	4	216310	191960	1.05964	0.940358	extracellular	K01158	DNASE2; deoxyribonuclease II [EC:3.1.22.1]	hsa04142 Lysosome; hsa04623 Cytosolic DNA-sensing pathway	GO:0000737 DNA catabolic process, endonucleolytic; GO:0002262 myeloid cell homeostasis; GO:0002376 immune system process; GO:0002520 immune system development; GO:0006139 nucleobase-containing compound metabolic process; GO:0006259 DNA metabolic process; GO:0006308 DNA catabolic process; GO:0006309 apoptotic DNA fragmentation; GO:0006725 cellular aromatic compound metabolic process; GO:0006807 ni…	GO:0000323 lytic vacuole; GO:0005622 intracellular anatomical structure; GO:0005737 cytoplasm; GO:0005764 lysosome; GO:0005773 vacuole; GO:0043226 organelle; GO:0043227 membrane-bounded organelle; GO:0043229 intracellular organelle; GO:0043231 intracellular membrane-bounded organelle;	GO:0003676 nucleic acid binding; GO:0003677 DNA binding; GO:0003824 catalytic activity; GO:0004518 nuclease activity; GO:0004519 endonuclease activity; GO:0004520 endodeoxyribonuclease activity; GO:0004531 deoxyribonuclease II activity; GO:0004536 deoxyribonuclease activity; GO:0005488 binding; GO:0016787 hydrolase activity; GO:0016788 hydrolase activity, acting on ester bonds; GO:0016889 endodeo…			L	KOG3825	Deoxyribonuclease II				R-HSA-199991 Membrane Trafficking;R-HSA-199992 trans-Golgi Network Vesicle Budding;R-HSA-432720 Lysosome Vesicle Biogenesis;R-HSA-5653656 Vesicle-mediated transport	https://reactome.org/PathwayBrowser/#/R-HSA-199991;https://reactome.org/PathwayBrowser/#/R-HSA-199992;https://reactome.org/PathwayBrowser/#/R-HSA-432720;https://reactome.org/PathwayBrowser/#/R-HSA-5653656
O00116	Alkyldihydroxyacetonephosphate synthase, peroxisomal OS=Homo sapiens OX=9606 GN=AGPS PE=1 SV=1	AGPS	1.00547	None	72.911	37.5	16	16	16	717200	721120	0.997275	1.00273	cytoplasm	K00803	AGPS; alkyldihydroxyacetonephosphate synthase [EC:2.5.1.26]	hsa00565 Ether lipid metabolism; hsa04146 Peroxisome; hsa01100 Metabolic pathways	GO:0006605 protein targeting; GO:0006625 protein targeting to peroxisome; GO:0006629 lipid metabolic process; GO:0006662 glycerol ether metabolic process; GO:0006810 transport; GO:0006886 intracellular protein transport; GO:0006996 organelle organization; GO:0007031 peroxisome organization; GO:0008104 protein localization; GO:0008152 metabolic process; GO:0008610 lipid biosynthetic process; GO:00…	GO:0005622 intracellular anatomical structure; GO:0005634 nucleus; GO:0005730 nucleolus; GO:0005737 cytoplasm; GO:0005739 mitochondrion; GO:0005777 peroxisome; GO:0005778 peroxisomal membrane; GO:0005782 peroxisomal matrix; GO:0005829 cytosol; GO:0016020 membrane; GO:0031090 organelle membrane; GO:0031903 microbody membrane; GO:0031907 microbody lumen; GO:0031974 membrane-enclosed lumen; GO:00319…	GO:0000166 nucleotide binding; GO:0003824 catalytic activity; GO:0005488 binding; GO:0008609 alkylglycerone-phosphate synthase activity; GO:0016740 transferase activity; GO:0016765 transferase activity, transferring alkyl or aryl (other than methyl) groups; GO:0036094 small molecule binding; GO:0043167 ion binding; GO:0043168 anion binding; GO:0050660 flavin adenine dinucleotide binding; GO:00719…	PF01565; PF02913	PF01565 FAD binding domain ; PF02913 FAD linked oxidases, C-terminal domain	R	KOG1233	Alkyl-dihydroxyacetonephosphate synthase	WP2533 GLYCEROPHOSPHOLIPID BIOSYNTHETIC PATHWAY;WP325 TRIACYLGLYCERIDE SYNTHESIS	http://www.wikipathways.org/instance/WP2533_r120261;http://www.wikipathways.org/instance/WP325_r116669		R-HSA-1430728 Metabolism;R-HSA-556833 Metabolism of lipids;R-HSA-75896 Plasmalogen biosynthesis;R-HSA-8848584 Wax and plasmalogen biosynthesis;R-HSA-9033241 Peroxisomal protein import;R-HSA-9033500 TYSND1 cleaves peroxisomal proteins;R-HSA-9609507 Protein localization	https://reactome.org/PathwayBrowser/#/R-HSA-1430728;https://reactome.org/PathwayBrowser/#/R-HSA-556833;https://reactome.org/PathwayBrowser/#/R-HSA-75896;https://reactome.org/PathwayBrowser/#/R-HSA-8848584;https://reactome.org/PathwayBrowser/#/R-HSA-9033241;https://reactome.org/PathwayBrowser/#/R-HSA-9033500;https://reactome.org/PathwayBrowser/#/R-HSA-9609507
O00139	Kinesin-like protein KIF2A OS=Homo sapiens OX=9606 GN=KIF2A PE=1 SV=3	KIF2A	0.896996	None	79.954	30.2	15	14	15	319210	286330	1.0543	0.945701	cytoplasm,nucleus	K10393			GO:0000003 reproduction; GO:0000070 mitotic sister chromatid segregation; GO:0000212 meiotic spindle organization; GO:0000226 microtubule cytoskeleton organization; GO:0000278 mitotic cell cycle; GO:0000280 nuclear division; GO:0000819 sister chromatid segregation; GO:0001578 microtubule bundle formation; GO:0001709 cell fate determination; GO:0002376 immune system process; GO:0002478 antigen pro…	GO:0000235 astral microtubule; GO:0000775 chromosome, centromeric region; GO:0000776 kinetochore; GO:0000779 condensed chromosome, centromeric region; GO:0000793 condensed chromosome; GO:0000922 spindle pole; GO:0005622 intracellular anatomical structure; GO:0005634 nucleus; GO:0005654 nucleoplasm; GO:0005694 chromosome; GO:0005730 nucleolus; GO:0005737 cytoplasm; GO:0005813 centrosome; GO:000581…	GO:0003774 cytoskeletal motor activity; GO:0003777 microtubule motor activity; GO:0003824 catalytic activity; GO:0005488 binding; GO:0005515 protein binding; GO:0008017 microtubule binding; GO:0008092 cytoskeletal protein binding; GO:0008574 plus-end-directed microtubule motor activity; GO:0015631 tubulin binding; GO:0016462 pyrophosphatase activity; GO:0016787 hydrolase activity; GO:0016817 hydr…	PF00225	PF00225 Kinesin motor domain	Z	KOG0246	Kinesin-like protein				R-HSA-109582 Hemostasis;R-HSA-1280218 Adaptive Immune System;R-HSA-141424 Amplification of signal from the kinetochores;R-HSA-141444 Amplification of signal from unattached kinetochores via a MAD2 inhibitory signal;R-HSA-162582 Signal Transduction;R-HSA-1640170 Cell Cycle;R-HSA-168256 Immune System;R-HSA-194315 Signaling by Rho GTPases;R-HSA-195258 RHO GTPase Effectors;R-HSA-199991 Membrane Traff…	https://reactome.org/PathwayBrowser/#/R-HSA-109582;https://reactome.org/PathwayBrowser/#/R-HSA-1280218;https://reactome.org/PathwayBrowser/#/R-HSA-141424;https://reactome.org/PathwayBrowser/#/R-HSA-141444;https://reactome.org/PathwayBrowser/#/R-HSA-162582;https://reactome.org/PathwayBrowser/#/R-HSA-1640170;https://reactome.org/PathwayBrowser/#/R-HSA-168256;https://reactome.org/PathwayBrowser/#/R-…	COMPLEMENT;GLYCOLYSIS	https://www.gsea-msigdb.org/gsea/msigdb/cards/HALLMARK_COMPLEMENT;https://www.gsea-msigdb.org/gsea/msigdb/cards/HALLMARK_GLYCOLYSIS
O00148	ATP-dependent RNA helicase DDX39A OS=Homo sapiens OX=9606 GN=DDX39A PE=1 SV=2	DDX39A	0.952525	None	49.129	55.5	17	7	7	460450	438590	1.02431	0.975685	cytoplasm	K13182			GO:0000375 RNA splicing, via transesterification reactions; GO:0000377 RNA splicing, via transesterification reactions with bulged adenosine as nucleophile; GO:0000381 regulation of alternative mRNA splicing, via spliceosome; GO:0000398 mRNA splicing, via spliceosome; GO:0006139 nucleobase-containing compound metabolic process; GO:0006325 chromatin organization; GO:0006338 chromatin remodeling; G…	GO:0000346 transcription export complex; GO:0005622 intracellular anatomical structure; GO:0005634 nucleus; GO:0005654 nucleoplasm; GO:0005667 transcription regulator complex; GO:0005681 spliceosomal complex; GO:0005730 nucleolus; GO:0005737 cytoplasm; GO:0016604 nuclear body; GO:0016607 nuclear speck; GO:0031974 membrane-enclosed lumen; GO:0031981 nuclear lumen; GO:0032991 protein-containing com…	GO:0003724 RNA helicase activity; GO:0003824 catalytic activity; GO:0004386 helicase activity; GO:0005488 binding; GO:0005515 protein binding; GO:0008134 transcription factor binding; GO:0008186 ATP-dependent activity, acting on RNA; GO:0016462 pyrophosphatase activity; GO:0016787 hydrolase activity; GO:0016817 hydrolase activity, acting on acid anhydrides; GO:0016818 hydrolase activity, acting o…	PF00270; PF00271	PF00270 DEAD/DEAH box helicase; PF00271 Helicase conserved C-terminal domain	A	KOG0329	ATP-dependent RNA helicase				R-HSA-159236 Transport of Mature mRNA derived from an Intron-Containing Transcript;R-HSA-72187 mRNA 3'-end processing;R-HSA-72202 Transport of Mature Transcript to Cytoplasm;R-HSA-72203 Processing of Capped Intron-Containing Pre-mRNA;R-HSA-73856 RNA Polymerase II Transcription Termination;R-HSA-73857 RNA Polymerase II Transcription;R-HSA-74160 Gene expression (Transcription);R-HSA-8953854 Metabol…	https://reactome.org/PathwayBrowser/#/R-HSA-159236;https://reactome.org/PathwayBrowser/#/R-HSA-72187;https://reactome.org/PathwayBrowser/#/R-HSA-72202;https://reactome.org/PathwayBrowser/#/R-HSA-72203;https://reactome.org/PathwayBrowser/#/R-HSA-73856;https://reactome.org/PathwayBrowser/#/R-HSA-73857;https://reactome.org/PathwayBrowser/#/R-HSA-74160;https://reactome.org/PathwayBrowser/#/R-HSA-8953…	E2F TARGETS;G2M CHECKPOINT;MTORC1 SIGNALING	https://www.gsea-msigdb.org/gsea/msigdb/cards/HALLMARK_E2F_TARGETS;https://www.gsea-msigdb.org/gsea/msigdb/cards/HALLMARK_G2M_CHECKPOINT;https://www.gsea-msigdb.org/gsea/msigdb/cards/HALLMARK_MTORC1_SIGNALING
O00151	PDZ and LIM domain protein 1 OS=Homo sapiens OX=9606 GN=PDLIM1 PE=1 SV=4	PDLIM1	0.701011	None	36.071	48.6	10	10	10	1583000	1109700	1.17577	0.824228	cytoplasm	K23353			GO:0006355 regulation of transcription, DNA-templated; GO:0006950 response to stress; GO:0006979 response to oxidative stress; GO:0009889 regulation of biosynthetic process; GO:0009891 positive regulation of biosynthetic process; GO:0009893 positive regulation of metabolic process; GO:0010468 regulation of gene expression; GO:0010556 regulation of macromolecule biosynthetic process; GO:0010557 po…	GO:0005622 intracellular anatomical structure; GO:0005667 transcription regulator complex; GO:0032991 protein-containing complex;	GO:0003712 transcription coregulator activity; GO:0003713 transcription coactivator activity; GO:0140110 transcription regulator activity;	PF00595; PF00412	PF00595 PDZ domain; PF00412 LIM domain	TZ	KOG1703	Adaptor protein Enigma and related PDZ-LIM proteins						REACTIVE OXYGEN SPECIES PATHWAY	https://www.gsea-msigdb.org/gsea/msigdb/cards/HALLMARK_REACTIVE_OXYGEN_SPECIES_PATHWAY
O00154	Cytosolic acyl coenzyme A thioester hydrolase OS=Homo sapiens OX=9606 GN=ACOT7 PE=1 SV=3	ACOT7	1.06299	None	41.796	28.9	7	7	7	569760	605650	0.969466	1.03053	mitochondria	K17360	ACOT7; acyl-coenzyme A thioesterase 7 [EC:3.1.2.2]	hsa00062 Fatty acid elongation; hsa01040 Biosynthesis of unsaturated fatty acids	GO:0001676 long-chain fatty acid metabolic process; GO:0006082 organic acid metabolic process; GO:0006139 nucleobase-containing compound metabolic process; GO:0006163 purine nucleotide metabolic process; GO:0006164 purine nucleotide biosynthetic process; GO:0006195 purine nucleotide catabolic process; GO:0006629 lipid metabolic process; GO:0006631 fatty acid metabolic process; GO:0006633 fatty ac…	GO:0005622 intracellular anatomical structure; GO:0005634 nucleus; GO:0005654 nucleoplasm; GO:0005737 cytoplasm; GO:0005739 mitochondrion; GO:0005829 cytosol; GO:0031974 membrane-enclosed lumen; GO:0031981 nuclear lumen; GO:0043226 organelle; GO:0043227 membrane-bounded organelle; GO:0043229 intracellular organelle; GO:0043231 intracellular membrane-bounded organelle; GO:0043233 organelle lumen; …	GO:0000062 fatty-acyl-CoA binding; GO:0000166 nucleotide binding; GO:0003824 catalytic activity; GO:0005488 binding; GO:0005515 protein binding; GO:0016289 CoA hydrolase activity; GO:0016290 palmitoyl-CoA hydrolase activity; GO:0016787 hydrolase activity; GO:0016788 hydrolase activity, acting on ester bonds; GO:0016790 thiolester hydrolase activity; GO:0017076 purine nucleotide binding; GO:003055…			I	KOG2763	Acyl-CoA thioesterase	WP5064 7OXOC AND 7BETAHC PATHWAYS;WP4545 OXYSTEROLS DERIVED FROM CHOLESTEROL	http://www.wikipathways.org/instance/WP5064_r120384;http://www.wikipathways.org/instance/WP4545_r120411		R-HSA-1430728 Metabolism;R-HSA-556833 Metabolism of lipids;R-HSA-77289 Mitochondrial Fatty Acid Beta-Oxidation;R-HSA-8978868 Fatty acid metabolism	https://reactome.org/PathwayBrowser/#/R-HSA-1430728;https://reactome.org/PathwayBrowser/#/R-HSA-556833;https://reactome.org/PathwayBrowser/#/R-HSA-77289;https://reactome.org/PathwayBrowser/#/R-HSA-8978868
O00159	Unconventional myosin-Ic OS=Homo sapiens OX=9606 GN=MYO1C PE=1 SV=4	MYO1C	0.860193	None	121.68	17.8	14	14	14	176600	151910	1.07516	0.924842	cytoplasm	K10356	MYO1; myosin I	hsa05130 Pathogenic Escherichia coli infection	GO:0000003 reproduction; GO:0002009 morphogenesis of an epithelium; GO:0002165 instar larval or pupal development; GO:0002252 immune effector process; GO:0002253 activation of immune response; GO:0002376 immune system process; GO:0002429 immune response-activating cell surface receptor signaling pathway; GO:0002431 Fc receptor mediated stimulatory signaling pathway; GO:0002433 immune response-reg…	GO:0001726 ruffle; GO:0005622 intracellular anatomical structure; GO:0005634 nucleus; GO:0005635 nuclear envelope; GO:0005643 nuclear pore; GO:0005654 nucleoplasm; GO:0005730 nucleolus; GO:0005737 cytoplasm; GO:0005829 cytosol; GO:0005856 cytoskeleton; GO:0005884 actin filament; GO:0005886 plasma membrane; GO:0005902 microvillus; GO:0005903 brush border; GO:0005938 cell cortex; GO:0009925 basal p…	GO:0000146 microfilament motor activity; GO:0000166 nucleotide binding; GO:0003774 cytoskeletal motor activity; GO:0003779 actin binding; GO:0003824 catalytic activity; GO:0005102 signaling receptor binding; GO:0005488 binding; GO:0005515 protein binding; GO:0005516 calmodulin binding; GO:0005524 ATP binding; GO:0005543 phospholipid binding; GO:0008022 protein C-terminus binding; GO:0008092 cytos…	PF00063; PF06017	PF00063 Myosin head (motor domain); PF06017 Unconventional myosin tail, actin- and lipid-binding	Z	KOG0164	Myosin class I heavy chain	WP4932 7Q1123 COPY NUMBER VARIATION SYNDROME;WP481 INSULIN SIGNALING;WP3888 VEGFAVEGFR2 SIGNALING PATHWAY	http://www.wikipathways.org/instance/WP4932_r118797;http://www.wikipathways.org/instance/WP481_r120562;http://www.wikipathways.org/instance/WP3888_r116782		R-HSA-1445148 Translocation of SLC2A4 (GLUT4) to the plasma membrane;R-HSA-1643685 Disease;R-HSA-168249 Innate Immune System;R-HSA-168256 Immune System;R-HSA-199991 Membrane Trafficking;R-HSA-2029480 Fcgamma receptor (FCGR) dependent phagocytosis;R-HSA-2029482 Regulation of actin dynamics for phagocytic cup formation;R-HSA-5653656 Vesicle-mediated transport;R-HSA-5663205 Infectious disease;R-HSA-…	https://reactome.org/PathwayBrowser/#/R-HSA-1445148;https://reactome.org/PathwayBrowser/#/R-HSA-1643685;https://reactome.org/PathwayBrowser/#/R-HSA-168249;https://reactome.org/PathwayBrowser/#/R-HSA-168256;https://reactome.org/PathwayBrowser/#/R-HSA-199991;https://reactome.org/PathwayBrowser/#/R-HSA-2029480;https://reactome.org/PathwayBrowser/#/R-HSA-2029482;https://reactome.org/PathwayBrowser/#/…	IL2 STAT5 SIGNALING;MYOGENESIS	https://www.gsea-msigdb.org/gsea/msigdb/cards/HALLMARK_IL2_STAT5_SIGNALING;https://www.gsea-msigdb.org/gsea/msigdb/cards/HALLMARK_MYOGENESIS
O00161	Synaptosomal-associated protein 23 OS=Homo sapiens OX=9606 GN=SNAP23 PE=1 SV=1	SNAP23	0.787651	None	23.354	53.1	8	8	8	601840	474040	1.11879	0.881214	cytoplasm	K08508	SNAP23; synaptosomal-associated protein 23	hsa04130 SNARE interactions in vesicular transport; hsa04611 Platelet activation	GO:0001505 regulation of neurotransmitter levels; GO:0001775 cell activation; GO:0001821 histamine secretion; GO:0002252 immune effector process; GO:0002263 cell activation involved in immune response; GO:0002274 myeloid leukocyte activation; GO:0002275 myeloid cell activation involved in immune response; GO:0002279 mast cell activation involved in immune response; GO:0002283 neutrophil activatio…	GO:0000323 lytic vacuole; GO:0005622 intracellular anatomical structure; GO:0005634 nucleus; GO:0005654 nucleoplasm; GO:0005737 cytoplasm; GO:0005764 lysosome; GO:0005766 primary lysosome; GO:0005773 vacuole; GO:0005886 plasma membrane; GO:0005911 cell-cell junction; GO:0005912 adherens junction; GO:0012505 endomembrane system; GO:0012506 vesicle membrane; GO:0016020 membrane; GO:0030054 cell jun…	GO:0000149 SNARE binding; GO:0005484 SNAP receptor activity; GO:0005488 binding; GO:0005515 protein binding; GO:0019905 syntaxin binding;			U	KOG3065	SNAP-25 (synaptosome-associated protein) component of SNARE complex	WP481 INSULIN SIGNALING	http://www.wikipathways.org/instance/WP481_r120562		R-HSA-1236974 ER-Phagosome pathway;R-HSA-1236975 Antigen processing-Cross presentation;R-HSA-1280218 Adaptive Immune System;R-HSA-1445148 Translocation of SLC2A4 (GLUT4) to the plasma membrane;R-HSA-162582 Signal Transduction;R-HSA-168249 Innate Immune System;R-HSA-168256 Immune System;R-HSA-194315 Signaling by Rho GTPases;R-HSA-199991 Membrane Trafficking;R-HSA-199992 trans-Golgi Network Vesicle…	https://reactome.org/PathwayBrowser/#/R-HSA-1236974;https://reactome.org/PathwayBrowser/#/R-HSA-1236975;https://reactome.org/PathwayBrowser/#/R-HSA-1280218;https://reactome.org/PathwayBrowser/#/R-HSA-1445148;https://reactome.org/PathwayBrowser/#/R-HSA-162582;https://reactome.org/PathwayBrowser/#/R-HSA-168249;https://reactome.org/PathwayBrowser/#/R-HSA-168256;https://reactome.org/PathwayBrowser/#/…	PROTEIN SECRETION	https://www.gsea-msigdb.org/gsea/msigdb/cards/HALLMARK_PROTEIN_SECRETION
O00165	HCLS1-associated protein X-1 OS=Homo sapiens OX=9606 GN=HAX1 PE=1 SV=2	HAX1	1.13015	None	31.62	28	4	4	4	101190	114360	0.9389	1.0611	cytoplasm,nucleus	K16220			GO:0001932 regulation of protein phosphorylation; GO:0001934 positive regulation of protein phosphorylation; GO:0002682 regulation of immune system process; GO:0002684 positive regulation of immune system process; GO:0002761 regulation of myeloid leukocyte differentiation; GO:0002763 positive regulation of myeloid leukocyte differentiation; GO:0006355 regulation of transcription, DNA-templated; G…	GO:0005622 intracellular anatomical structure; GO:0005634 nucleus; GO:0005635 nuclear envelope; GO:0005667 transcription regulator complex; GO:0005737 cytoplasm; GO:0005739 mitochondrion; GO:0005740 mitochondrial envelope; GO:0005741 mitochondrial outer membrane; GO:0005758 mitochondrial intermembrane space; GO:0005783 endoplasmic reticulum; GO:0005856 cytoskeleton; GO:0005886 plasma membrane; GO…	GO:0005488 binding; GO:0005515 protein binding; GO:0019838 growth factor binding; GO:0019904 protein domain specific binding; GO:0019955 cytokine binding; GO:0019966 interleukin-1 binding; GO:0047485 protein N-terminus binding;								Transcription factor			GLYCOLYSIS;IL6 JAK STAT3 SIGNALING	https://www.gsea-msigdb.org/gsea/msigdb/cards/HALLMARK_GLYCOLYSIS;https://www.gsea-msigdb.org/gsea/msigdb/cards/HALLMARK_IL6_JAK_STAT3_SIGNALING
O00170	AH receptor-interacting protein OS=Homo sapiens OX=9606 GN=AIP PE=1 SV=3	AIP	0.955651	None	37.664	40.3	8	8	8	217820	208160	1.02268	0.977323	cytoplasm	K17767	AIP; AH receptor-interacting protein	hsa04934 Cushing syndrome; hsa05207 Chemical carcinogenesis - receptor activation	GO:0003008 system process; GO:0006457 protein folding; GO:0006605 protein targeting; GO:0006626 protein targeting to mitochondrion; GO:0006805 xenobiotic metabolic process; GO:0006807 nitrogen compound metabolic process; GO:0006810 transport; GO:0006839 mitochondrial transport; GO:0006886 intracellular protein transport; GO:0006996 organelle organization; GO:0007005 mitochondrion organization; GO…	GO:0005622 intracellular anatomical structure; GO:0005634 nucleus; GO:0005654 nucleoplasm; GO:0005667 transcription regulator complex; GO:0005737 cytoplasm; GO:0005829 cytosol; GO:0016020 membrane; GO:0031974 membrane-enclosed lumen; GO:0031981 nuclear lumen; GO:0032991 protein-containing complex; GO:0034751 aryl hydrocarbon receptor complex; GO:0043226 organelle; GO:0043227 membrane-bounded orga…	GO:0003712 transcription coregulator activity; GO:0003713 transcription coactivator activity; GO:0005102 signaling receptor binding; GO:0005488 binding; GO:0005515 protein binding; GO:0008134 transcription factor binding; GO:0017162 aryl hydrocarbon receptor binding; GO:0019904 protein domain specific binding; GO:0036004 GAF domain binding; GO:0051082 unfolded protein binding; GO:0140110 transcri…	PF00254	PF00254 FKBP-type peptidyl-prolyl cis-trans isomerase	O	KOG0545	Aryl-hydrocarbon receptor-interacting protein	WP2586 ARYL HYDROCARBON RECEPTOR PATHWAY WP2586;WP2873 ARYL HYDROCARBON RECEPTOR PATHWAY WP2873;WP2882 NUCLEAR RECEPTORS METAPATHWAY	http://www.wikipathways.org/instance/WP2586_r120796;http://www.wikipathways.org/instance/WP2873_r120645;http://www.wikipathways.org/instance/WP2882_r117808	Transcription factor	R-HSA-1280215 Cytokine Signaling in Immune system;R-HSA-1430728 Metabolism;R-HSA-168256 Immune System;R-HSA-211859 Biological oxidations;R-HSA-211945 Phase I - Functionalization of compounds;R-HSA-447115 Interleukin-12 family signaling;R-HSA-449147 Signaling by Interleukins;R-HSA-8937144 Aryl hydrocarbon receptor signalling;R-HSA-8950505 Gene and protein expression by JAK-STAT signaling after Int…	https://reactome.org/PathwayBrowser/#/R-HSA-1280215;https://reactome.org/PathwayBrowser/#/R-HSA-1430728;https://reactome.org/PathwayBrowser/#/R-HSA-168256;https://reactome.org/PathwayBrowser/#/R-HSA-211859;https://reactome.org/PathwayBrowser/#/R-HSA-211945;https://reactome.org/PathwayBrowser/#/R-HSA-447115;https://reactome.org/PathwayBrowser/#/R-HSA-449147;https://reactome.org/PathwayBrowser/#/R-…
O00178	GTP-binding protein 1 OS=Homo sapiens OX=9606 GN=GTPBP1 PE=1 SV=3	GTPBP1	0.93595	None	72.453	19.6	8	8	8	154880	144960	1.03308	0.966916	cytoplasm	K24887			GO:0002376 immune system process; GO:0006139 nucleobase-containing compound metabolic process; GO:0006163 purine nucleotide metabolic process; GO:0006725 cellular aromatic compound metabolic process; GO:0006753 nucleoside phosphate metabolic process; GO:0006793 phosphorus metabolic process; GO:0006796 phosphate-containing compound metabolic process; GO:0006807 nitrogen compound metabolic process;…	GO:0000177 cytoplasmic exosome (RNase complex); GO:0000178 exosome (RNase complex); GO:0005622 intracellular anatomical structure; GO:0005737 cytoplasm; GO:0005829 cytosol; GO:0032991 protein-containing complex; GO:1902494 catalytic complex; GO:1905354 exoribonuclease complex;	GO:0000166 nucleotide binding; GO:0001882 nucleoside binding; GO:0001883 purine nucleoside binding; GO:0003824 catalytic activity; GO:0003924 GTPase activity; GO:0005488 binding; GO:0005525 GTP binding; GO:0016462 pyrophosphatase activity; GO:0016787 hydrolase activity; GO:0016817 hydrolase activity, acting on acid anhydrides; GO:0016818 hydrolase activity, acting on acid anhydrides, in phosphoru…	PF00009	PF00009 Elongation factor Tu GTP binding domain	R	KOG0463	GTP-binding protein GP-1
O00186	Syntaxin-binding protein 3 OS=Homo sapiens OX=9606 GN=STXBP3 PE=1 SV=2	STXBP3	0.942352	None	67.764	20.3	10	10	10	135650	127830	1.02968	0.97032	cytoplasm	K15301			GO:0001775 cell activation; GO:0002252 immune effector process; GO:0002263 cell activation involved in immune response; GO:0002274 myeloid leukocyte activation; GO:0002275 myeloid cell activation involved in immune response; GO:0002283 neutrophil activation involved in immune response; GO:0002366 leukocyte activation involved in immune response; GO:0002376 immune system process; GO:0002443 leukoc…	GO:0005622 intracellular anatomical structure; GO:0005737 cytoplasm; GO:0005829 cytosol; GO:0005886 plasma membrane; GO:0012505 endomembrane system; GO:0016020 membrane; GO:0016323 basolateral plasma membrane; GO:0016324 apical plasma membrane; GO:0030139 endocytic vesicle; GO:0030141 secretory granule; GO:0031091 platelet alpha granule; GO:0031410 cytoplasmic vesicle; GO:0031982 vesicle; GO:0042…	GO:0000149 SNARE binding; GO:0005488 binding; GO:0005515 protein binding; GO:0017075 syntaxin-1 binding; GO:0019905 syntaxin binding;			U	KOG1300	Vesicle trafficking protein Sec1	WP481 INSULIN SIGNALING	http://www.wikipathways.org/instance/WP481_r120562		R-HSA-109582 Hemostasis;R-HSA-114516 Disinhibition of SNARE formation;R-HSA-1445148 Translocation of SLC2A4 (GLUT4) to the plasma membrane;R-HSA-199991 Membrane Trafficking;R-HSA-5653656 Vesicle-mediated transport;R-HSA-76002 Platelet activation, signaling and aggregation;R-HSA-76005 Response to elevated platelet cytosolic Ca2+	https://reactome.org/PathwayBrowser/#/R-HSA-109582;https://reactome.org/PathwayBrowser/#/R-HSA-114516;https://reactome.org/PathwayBrowser/#/R-HSA-1445148;https://reactome.org/PathwayBrowser/#/R-HSA-199991;https://reactome.org/PathwayBrowser/#/R-HSA-5653656;https://reactome.org/PathwayBrowser/#/R-HSA-76002;https://reactome.org/PathwayBrowser/#/R-HSA-76005
O00189	AP-4 complex subunit mu-1 OS=Homo sapiens OX=9606 GN=AP4M1 PE=1 SV=2	AP4M1		None	49.976	2.4	1	1	1	0	0			nucleus	K12402	AP4M1; AP-4 complex subunit mu-1	hsa04142 Lysosome	GO:0006605 protein targeting; GO:0006622 protein targeting to lysosome; GO:0006623 protein targeting to vacuole; GO:0006810 transport; GO:0006886 intracellular protein transport; GO:0006892 post-Golgi vesicle-mediated transport; GO:0006895 Golgi to endosome transport; GO:0006896 Golgi to vacuole transport; GO:0007034 vacuolar transport; GO:0007041 lysosomal transport; GO:0008104 protein localizat…	GO:0000139 Golgi membrane; GO:0005622 intracellular anatomical structure; GO:0005737 cytoplasm; GO:0005768 endosome; GO:0005769 early endosome; GO:0005794 Golgi apparatus; GO:0005802 trans-Golgi network; GO:0012505 endomembrane system; GO:0016020 membrane; GO:0030117 membrane coat; GO:0030119 AP-type membrane coat adaptor complex; GO:0030124 AP-4 adaptor complex; GO:0031090 organelle membrane; GO…	GO:0005488 binding; GO:0005515 protein binding; GO:0019904 protein domain specific binding;	PF01217	PF01217 Clathrin adaptor complex small chain	U	KOG0937	Adaptor complexes medium subunit family				R-HSA-199991 Membrane Trafficking;R-HSA-199992 trans-Golgi Network Vesicle Budding;R-HSA-432720 Lysosome Vesicle Biogenesis;R-HSA-5653656 Vesicle-mediated transport	https://reactome.org/PathwayBrowser/#/R-HSA-199991;https://reactome.org/PathwayBrowser/#/R-HSA-199992;https://reactome.org/PathwayBrowser/#/R-HSA-432720;https://reactome.org/PathwayBrowser/#/R-HSA-5653656
O00193	Small acidic protein OS=Homo sapiens OX=9606 GN=SMAP PE=1 SV=1	SMAP	0.911296	None	20.332	21.9	3	3	3	852950	777290	1.04641	0.95359	nucleus
O00203	AP-3 complex subunit beta-1 OS=Homo sapiens OX=9606 GN=AP3B1 PE=1 SV=3	AP3B1	1.0181	None	121.32	29.3	23	23	23	385670	392650	0.991032	1.00897	cytoplasm	K12397	AP3B; AP-3 complex subunit beta	hsa04142 Lysosome	GO:0000041 transition metal ion transport; GO:0002376 immune system process; GO:0002475 antigen processing and presentation via MHC class Ib; GO:0002682 regulation of immune system process; GO:0002684 positive regulation of immune system process; GO:0002694 regulation of leukocyte activation; GO:0002696 positive regulation of leukocyte activation; GO:0006605 protein targeting; GO:0006622 protein …	GO:0005622 intracellular anatomical structure; GO:0005737 cytoplasm; GO:0005794 Golgi apparatus; GO:0005798 Golgi-associated vesicle; GO:0005802 trans-Golgi network; GO:0012505 endomembrane system; GO:0016020 membrane; GO:0030117 membrane coat; GO:0030119 AP-type membrane coat adaptor complex; GO:0030123 AP-3 adaptor complex; GO:0030135 coated vesicle; GO:0030137 COPI-coated vesicle; GO:0031410 c…	GO:0005215 transporter activity; GO:0005488 binding; GO:0005515 protein binding; GO:0019899 enzyme binding; GO:0019902 phosphatase binding; GO:0019903 protein phosphatase binding; GO:0030742 GTP-dependent protein binding;			U	KOG1060	Vesicle coat complex AP-3, beta subunit				R-HSA-1643685 Disease;R-HSA-199991 Membrane Trafficking;R-HSA-199992 trans-Golgi Network Vesicle Budding;R-HSA-432722 Golgi Associated Vesicle Biogenesis;R-HSA-5653656 Vesicle-mediated transport;R-HSA-5663202 Diseases of signal transduction by growth factor receptors and second messengers;R-HSA-6802952 Signaling by BRAF and RAF1 fusions;R-HSA-6802957 Oncogenic MAPK signaling	https://reactome.org/PathwayBrowser/#/R-HSA-1643685;https://reactome.org/PathwayBrowser/#/R-HSA-199991;https://reactome.org/PathwayBrowser/#/R-HSA-199992;https://reactome.org/PathwayBrowser/#/R-HSA-432722;https://reactome.org/PathwayBrowser/#/R-HSA-5653656;https://reactome.org/PathwayBrowser/#/R-HSA-5663202;https://reactome.org/PathwayBrowser/#/R-HSA-6802952;https://reactome.org/PathwayBrowser/#/…	PROTEIN SECRETION	https://www.gsea-msigdb.org/gsea/msigdb/cards/HALLMARK_PROTEIN_SECRETION
O00214	Galectin-8 OS=Homo sapiens OX=9606 GN=LGALS8 PE=1 SV=4	LGALS8	0.875976	None	35.808	12.9	4	4	4	87112	76308	1.06611	0.933888	cytoplasm	K06832			GO:0001667 ameboidal-type cell migration; GO:0001775 cell activation; GO:0001944 vasculature development; GO:0001945 lymph vessel development; GO:0002252 immune effector process; GO:0002263 cell activation involved in immune response; GO:0002285 lymphocyte activation involved in immune response; GO:0002312 B cell activation involved in immune response; GO:0002313 mature B cell differentiation inv…	GO:0005576 extracellular region; GO:0005615 extracellular space; GO:0005622 intracellular anatomical structure; GO:0005737 cytoplasm; GO:0005829 cytosol;	GO:0005102 signaling receptor binding; GO:0005178 integrin binding; GO:0005488 binding; GO:0005515 protein binding; GO:0016936 galactoside binding; GO:0030246 carbohydrate binding; GO:0044877 protein-containing complex binding; GO:0050839 cell adhesion molecule binding; GO:0097367 carbohydrate derivative binding;	PF00337	PF00337 Galactoside-binding lectin	W	KOG3587	Galectin, galactose-binding lectin
O00217	NADH dehydrogenase [ubiquinone] iron-sulfur protein 8, mitochondrial OS=Homo sapiens OX=9606 GN=NDUFS8 PE=1 SV=1	NDUFS8	1.11136	None	23.705	29	5	5	5	387760	430940	0.947258	1.05274	mitochondria	K03941	NDUFS8; NADH dehydrogenase (ubiquinone) Fe-S protein 8 [EC:7.1.1.2]	hsa04932 Non-alcoholic fatty liver disease; hsa05208 Chemical carcinogenesis - reactive oxygen species; hsa05016 Huntington disease; hsa00190 Oxidative phosphorylation; hsa05415 Diabetic cardiomyopathy; hsa05012 Parkinson disease; hsa05010 Alzheimer disease; hsa04723 Retrograde endocannabinoid signaling; hsa04714 Thermogenesis; hsa05022 Pathways of neurodegeneration - multiple diseases; hsa05014 …	GO:0006091 generation of precursor metabolites and energy; GO:0006119 oxidative phosphorylation; GO:0006120 mitochondrial electron transport, NADH to ubiquinone; GO:0006139 nucleobase-containing compound metabolic process; GO:0006163 purine nucleotide metabolic process; GO:0006725 cellular aromatic compound metabolic process; GO:0006753 nucleoside phosphate metabolic process; GO:0006793 phosphoru…	GO:0005622 intracellular anatomical structure; GO:0005737 cytoplasm; GO:0005739 mitochondrion; GO:0005740 mitochondrial envelope; GO:0005743 mitochondrial inner membrane; GO:0005746 mitochondrial respirasome; GO:0005747 mitochondrial respiratory chain complex I; GO:0005759 mitochondrial matrix; GO:0016020 membrane; GO:0019866 organelle inner membrane; GO:0030964 NADH dehydrogenase complex; GO:003…	GO:0003824 catalytic activity; GO:0003954 NADH dehydrogenase activity; GO:0008137 NADH dehydrogenase (ubiquinone) activity; GO:0016491 oxidoreductase activity; GO:0016651 oxidoreductase activity, acting on NAD(P)H; GO:0016655 oxidoreductase activity, acting on NAD(P)H, quinone or similar compound as acceptor; GO:0050136 NADH dehydrogenase (quinone) activity;	PF12838	PF12838 4Fe-4S dicluster domain	C	KOG3256	NADH:ubiquinone oxidoreductase, NDUFS8/23 kDa subunit	WP111 ELECTRON TRANSPORT CHAIN OXPHOS SYSTEM IN MITOCHONDRIA;WP4396 NONALCOHOLIC FATTY LIVER DISEASE;WP623 OXIDATIVE PHOSPHORYLATION	http://www.wikipathways.org/instance/WP111_r117097;http://www.wikipathways.org/instance/WP4396_r98945;http://www.wikipathways.org/instance/WP623_r107189		R-HSA-1428517 The citric acid (TCA) cycle and respiratory electron transport;R-HSA-1430728 Metabolism;R-HSA-163200 Respiratory electron transport, ATP synthesis by chemiosmotic coupling, and heat production by uncoupling proteins.;R-HSA-611105 Respiratory electron transport;R-HSA-6799198 Complex I biogenesis	https://reactome.org/PathwayBrowser/#/R-HSA-1428517;https://reactome.org/PathwayBrowser/#/R-HSA-1430728;https://reactome.org/PathwayBrowser/#/R-HSA-163200;https://reactome.org/PathwayBrowser/#/R-HSA-611105;https://reactome.org/PathwayBrowser/#/R-HSA-6799198	OXIDATIVE PHOSPHORYLATION	https://www.gsea-msigdb.org/gsea/msigdb/cards/HALLMARK_OXIDATIVE_PHOSPHORYLATION
O00231	26S proteasome non-ATPase regulatory subunit 11 OS=Homo sapiens OX=9606 GN=PSMD11 PE=1 SV=3	PSMD11	1.01786	None	47.463	61.1	23	23	23	1192800	1214100	0.99115	1.00885	cytoplasm	K03036	PSMD11; 26S proteasome regulatory subunit N6	hsa05017 Spinocerebellar ataxia; hsa05016 Huntington disease; hsa03050 Proteasome; hsa05169 Epstein-Barr virus infection; hsa05012 Parkinson disease; hsa05010 Alzheimer disease; hsa05022 Pathways of neurodegeneration - multiple diseases; hsa05014 Amyotrophic lateral sclerosis; hsa05020 Prion disease	GO:0001775 cell activation; GO:0002252 immune effector process; GO:0002263 cell activation involved in immune response; GO:0002274 myeloid leukocyte activation; GO:0002275 myeloid cell activation involved in immune response; GO:0002283 neutrophil activation involved in immune response; GO:0002366 leukocyte activation involved in immune response; GO:0002376 immune system process; GO:0002443 leukoc…	GO:0000502 proteasome complex; GO:0005576 extracellular region; GO:0005622 intracellular anatomical structure; GO:0005634 nucleus; GO:0005654 nucleoplasm; GO:0005737 cytoplasm; GO:0005829 cytosol; GO:0005838 proteasome regulatory particle; GO:0008541 proteasome regulatory particle, lid subcomplex; GO:0012505 endomembrane system; GO:0022624 proteasome accessory complex; GO:0030141 secretory granul…	GO:0005198 structural molecule activity; GO:0005488 binding; GO:0005515 protein binding;	PF18055; PF01399; PF18503	PF18055 26S proteasome regulatory subunit RPN6 N-terminal domain; PF01399 PCI domain; PF18503 26S proteasome subunit RPN6 C-terminal helix domain	O	KOG1463	26S proteasome regulatory complex, subunit RPN6/PSMD11	WP2359 PARKINUBIQUITIN PROTEASOMAL SYSTEM PATHWAY;WP183 PROTEASOME DEGRADATION;WP3888 VEGFAVEGFR2 SIGNALING PATHWAY	http://www.wikipathways.org/instance/WP2359_r119918;http://www.wikipathways.org/instance/WP183_r117060;http://www.wikipathways.org/instance/WP3888_r116782		R-HSA-109581 Apoptosis;R-HSA-1168372 Downstream signaling events of B Cell Receptor (BCR);R-HSA-1169091 Activation of NF-kappaB in B cells;R-HSA-1234174 Cellular response to hypoxia;R-HSA-1234176 Oxygen-dependent proline hydroxylation of Hypoxia-inducible Factor Alpha;R-HSA-1236974 ER-Phagosome pathway;R-HSA-1236975 Antigen processing-Cross presentation;R-HSA-1236978 Cross-presentation of soluble…
O00232	26S proteasome non-ATPase regulatory subunit 12 OS=Homo sapiens OX=9606 GN=PSMD12 PE=1 SV=3	PSMD12	1.0151	None	52.904	55	24	24	24	997140	1012200	0.992505	1.00749	cytoplasm	K03035	PSMD12; 26S proteasome regulatory subunit N5	hsa05017 Spinocerebellar ataxia; hsa05016 Huntington disease; hsa03050 Proteasome; hsa05169 Epstein-Barr virus infection; hsa05012 Parkinson disease; hsa05010 Alzheimer disease; hsa05022 Pathways of neurodegeneration - multiple diseases; hsa05014 Amyotrophic lateral sclerosis; hsa05020 Prion disease	GO:0001775 cell activation; GO:0002252 immune effector process; GO:0002263 cell activation involved in immune response; GO:0002274 myeloid leukocyte activation; GO:0002275 myeloid cell activation involved in immune response; GO:0002283 neutrophil activation involved in immune response; GO:0002366 leukocyte activation involved in immune response; GO:0002376 immune system process; GO:0002443 leukoc…	GO:0000502 proteasome complex; GO:0005576 extracellular region; GO:0005622 intracellular anatomical structure; GO:0005634 nucleus; GO:0005654 nucleoplasm; GO:0005737 cytoplasm; GO:0005829 cytosol; GO:0005838 proteasome regulatory particle; GO:0008541 proteasome regulatory particle, lid subcomplex; GO:0012505 endomembrane system; GO:0022624 proteasome accessory complex; GO:0030141 secretory granul…		PF01399; PF18098	PF01399 PCI domain; PF18098 26S proteasome regulatory subunit RPN5 C-terminal domain	O	KOG1498	26S proteasome regulatory complex, subunit RPN5/PSMD12	WP5124 ALZHEIMERS DISEASE;WP2059 ALZHEIMERS DISEASE AND MIRNA EFFECTS;WP4352 CILIARY LANDSCAPE;WP2359 PARKINUBIQUITIN PROTEASOMAL SYSTEM PATHWAY;WP183 PROTEASOME DEGRADATION	http://www.wikipathways.org/instance/WP5124_r119432;http://www.wikipathways.org/instance/WP2059_r119468;http://www.wikipathways.org/instance/WP4352_r102218;http://www.wikipathways.org/instance/WP2359_r119918;http://www.wikipathways.org/instance/WP183_r117060		R-HSA-109581 Apoptosis;R-HSA-1168372 Downstream signaling events of B Cell Receptor (BCR);R-HSA-1169091 Activation of NF-kappaB in B cells;R-HSA-1234174 Cellular response to hypoxia;R-HSA-1234176 Oxygen-dependent proline hydroxylation of Hypoxia-inducible Factor Alpha;R-HSA-1236974 ER-Phagosome pathway;R-HSA-1236975 Antigen processing-Cross presentation;R-HSA-1236978 Cross-presentation of soluble…		MTORC1 SIGNALING	https://www.gsea-msigdb.org/gsea/msigdb/cards/HALLMARK_MTORC1_SIGNALING
O00233	26S proteasome non-ATPase regulatory subunit 9 OS=Homo sapiens OX=9606 GN=PSMD9 PE=1 SV=3	PSMD9	0.934844	None	24.682	44.4	8	8	8	455980	426270	1.03368	0.966325	cytoskeleton	K06693	PSMD9; 26S proteasome regulatory subunit N4	hsa05017 Spinocerebellar ataxia; hsa05016 Huntington disease; hsa03050 Proteasome; hsa05012 Parkinson disease; hsa05010 Alzheimer disease; hsa05022 Pathways of neurodegeneration - multiple diseases; hsa05014 Amyotrophic lateral sclerosis; hsa05020 Prion disease	GO:0002791 regulation of peptide secretion; GO:0002792 negative regulation of peptide secretion; GO:0002793 positive regulation of peptide secretion; GO:0006355 regulation of transcription, DNA-templated; GO:0006357 regulation of transcription by RNA polymerase II; GO:0006464 cellular protein modification process; GO:0006508 proteolysis; GO:0006511 ubiquitin-dependent protein catabolic process; G…	GO:0000502 proteasome complex; GO:0005622 intracellular anatomical structure; GO:0005634 nucleus; GO:0005654 nucleoplasm; GO:0005737 cytoplasm; GO:0005829 cytosol; GO:0005838 proteasome regulatory particle; GO:0008540 proteasome regulatory particle, base subcomplex; GO:0022624 proteasome accessory complex; GO:0031974 membrane-enclosed lumen; GO:0031981 nuclear lumen; GO:0032991 protein-containing…	GO:0003712 transcription coregulator activity; GO:0003713 transcription coactivator activity; GO:0005488 binding; GO:0005515 protein binding; GO:0008022 protein C-terminus binding; GO:0008134 transcription factor binding; GO:0043425 bHLH transcription factor binding; GO:0140110 transcription regulator activity;	PF18265; PF17820	PF18265 Nas2 N_terminal domain; PF17820 PDZ domain	O	KOG3129	26S proteasome regulatory complex, subunit PSMD9	WP5124 ALZHEIMERS DISEASE;WP2059 ALZHEIMERS DISEASE AND MIRNA EFFECTS;WP2359 PARKINUBIQUITIN PROTEASOMAL SYSTEM PATHWAY;WP183 PROTEASOME DEGRADATION	http://www.wikipathways.org/instance/WP5124_r119432;http://www.wikipathways.org/instance/WP2059_r119468;http://www.wikipathways.org/instance/WP2359_r119918;http://www.wikipathways.org/instance/WP183_r117060		R-HSA-109581 Apoptosis;R-HSA-1168372 Downstream signaling events of B Cell Receptor (BCR);R-HSA-1169091 Activation of NF-kappaB in B cells;R-HSA-1234174 Cellular response to hypoxia;R-HSA-1234176 Oxygen-dependent proline hydroxylation of Hypoxia-inducible Factor Alpha;R-HSA-1236974 ER-Phagosome pathway;R-HSA-1236975 Antigen processing-Cross presentation;R-HSA-1236978 Cross-presentation of soluble…		HEME METABOLISM	https://www.gsea-msigdb.org/gsea/msigdb/cards/HALLMARK_HEME_METABOLISM
O00244	Copper transport protein ATOX1 OS=Homo sapiens OX=9606 GN=ATOX1 PE=1 SV=1	ATOX1	1.23669	None	7.4016	52.9	3	3	3	785570	971510	0.894177	1.10582	extracellular	K07213	ATOX1; copper chaperone	hsa04978 Mineral absorption	GO:0000041 transition metal ion transport; GO:0006810 transport; GO:0006811 ion transport; GO:0006812 cation transport; GO:0006825 copper ion transport; GO:0006873 cellular ion homeostasis; GO:0006875 cellular metal ion homeostasis; GO:0006878 cellular copper ion homeostasis; GO:0006950 response to stress; GO:0006979 response to oxidative stress; GO:0009987 cellular process; GO:0015680 protein ma…	GO:0005622 intracellular anatomical structure; GO:0005737 cytoplasm; GO:0005829 cytosol;	GO:0005488 binding; GO:0005507 copper ion binding; GO:0005515 protein binding; GO:0016530 metallochaperone activity; GO:0016531 copper chaperone activity; GO:0032767 copper-dependent protein binding; GO:0043167 ion binding; GO:0043169 cation binding; GO:0046872 metal ion binding; GO:0046914 transition metal ion binding; GO:0140104 molecular carrier activity;	PF00403	PF00403 Heavy-metal-associated domain	P	KOG1603	Copper chaperone	WP3286 COPPER HOMEOSTASIS	http://www.wikipathways.org/instance/WP3286_r106367		R-HSA-168249 Innate Immune System;R-HSA-168256 Immune System;R-HSA-2262752 Cellular responses to stress;R-HSA-3299685 Detoxification of Reactive Oxygen Species;R-HSA-6803157 Antimicrobial peptides;R-HSA-6803544 Ion influx/efflux at host-pathogen interface;R-HSA-8953897 Cellular responses to stimuli;R-HSA-9711123 Cellular response to chemical stress	https://reactome.org/PathwayBrowser/#/R-HSA-168249;https://reactome.org/PathwayBrowser/#/R-HSA-168256;https://reactome.org/PathwayBrowser/#/R-HSA-2262752;https://reactome.org/PathwayBrowser/#/R-HSA-3299685;https://reactome.org/PathwayBrowser/#/R-HSA-6803157;https://reactome.org/PathwayBrowser/#/R-HSA-6803544;https://reactome.org/PathwayBrowser/#/R-HSA-8953897;https://reactome.org/PathwayBrowser/#…	COMPLEMENT;REACTIVE OXYGEN SPECIES PATHWAY	https://www.gsea-msigdb.org/gsea/msigdb/cards/HALLMARK_COMPLEMENT;https://www.gsea-msigdb.org/gsea/msigdb/cards/HALLMARK_REACTIVE_OXYGEN_SPECIES_PATHWAY
O00255	Menin OS=Homo sapiens OX=9606 GN=MEN1 PE=1 SV=4	MEN1		None	68.023	2.3	1	1	1	0	0			mitochondria	K14970	MEN1; menin	hsa04934 Cushing syndrome; hsa05202 Transcriptional misregulation in cancer	GO:0000003 reproduction; GO:0000075 cell cycle checkpoint signaling; GO:0000077 DNA damage checkpoint signaling; GO:0000079 regulation of cyclin-dependent protein serine/threonine kinase activity; GO:0000122 negative regulation of transcription by RNA polymerase II; GO:0000165 MAPK cascade; GO:0000278 mitotic cell cycle; GO:0001501 skeletal system development; GO:0001503 ossification; GO:0001649 …	GO:0000228 nuclear chromosome; GO:0000781 chromosome, telomeric region; GO:0000785 chromatin; GO:0005622 intracellular anatomical structure; GO:0005634 nucleus; GO:0005654 nucleoplasm; GO:0005694 chromosome; GO:0005737 cytoplasm; GO:0005783 endoplasmic reticulum; GO:0005788 endoplasmic reticulum lumen; GO:0005829 cytosol; GO:0005886 plasma membrane; GO:0012505 endomembrane system; GO:0016020 memb…	GO:0000217 DNA secondary structure binding; GO:0000400 four-way junction DNA binding; GO:0000403 Y-form DNA binding; GO:0001067 transcription regulatory region nucleic acid binding; GO:0003676 nucleic acid binding; GO:0003677 DNA binding; GO:0003682 chromatin binding; GO:0003690 double-stranded DNA binding; GO:0005488 binding; GO:0005515 protein binding; GO:0030674 protein-macromolecule adaptor a…								Transcription factor	R-HSA-162582 Signal Transduction;R-HSA-170834 Signaling by TGF-beta Receptor Complex;R-HSA-194315 Signaling by Rho GTPases;R-HSA-195258 RHO GTPase Effectors;R-HSA-195721 Signaling by WNT;R-HSA-201681 TCF dependent signaling in response to WNT;R-HSA-201722 Formation of the beta-catenin:TCF transactivating complex;R-HSA-212436 Generic Transcription Pathway;R-HSA-2173793 Transcriptional activity of …	https://reactome.org/PathwayBrowser/#/R-HSA-162582;https://reactome.org/PathwayBrowser/#/R-HSA-170834;https://reactome.org/PathwayBrowser/#/R-HSA-194315;https://reactome.org/PathwayBrowser/#/R-HSA-195258;https://reactome.org/PathwayBrowser/#/R-HSA-195721;https://reactome.org/PathwayBrowser/#/R-HSA-201681;https://reactome.org/PathwayBrowser/#/R-HSA-201722;https://reactome.org/PathwayBrowser/#/R-HS…
O00264	Membrane-associated progesterone receptor component 1 OS=Homo sapiens OX=9606 GN=PGRMC1 PE=1 SV=3	PGRMC1	0.959091	None	21.671	42.1	8	7	8	2178000	2088900	1.02088	0.979118	nucleus	K17278	PGRMC1_2; membrane-associated progesterone receptor component	hsa04080 Neuroactive ligand-receptor interaction	GO:0000003 reproduction; GO:0000902 cell morphogenesis; GO:0000904 cell morphogenesis involved in differentiation; GO:0001556 oocyte maturation; GO:0001775 cell activation; GO:0002252 immune effector process; GO:0002263 cell activation involved in immune response; GO:0002274 myeloid leukocyte activation; GO:0002275 myeloid cell activation involved in immune response; GO:0002283 neutrophil activat…	GO:0000775 chromosome, centromeric region; GO:0001674 female germ cell nucleus; GO:0005576 extracellular region; GO:0005615 extracellular space; GO:0005622 intracellular anatomical structure; GO:0005634 nucleus; GO:0005694 chromosome; GO:0005737 cytoplasm; GO:0005768 endosome; GO:0005783 endoplasmic reticulum; GO:0005819 spindle; GO:0005856 cytoskeleton; GO:0005886 plasma membrane; GO:0005887 int…	GO:0005488 binding; GO:0005496 steroid binding; GO:0008289 lipid binding; GO:0020037 heme binding; GO:0032934 sterol binding; GO:0035100 ecdysone binding; GO:0036094 small molecule binding; GO:0042562 hormone binding; GO:0043178 alcohol binding; GO:0046906 tetrapyrrole binding; GO:0097159 organic cyclic compound binding; GO:1901363 heterocyclic compound binding;	PF00173	PF00173 Cytochrome b5-like Heme/Steroid binding domain	R	KOG1110	Putative steroid membrane receptor Hpr6.6/25-Dx				R-HSA-168249 Innate Immune System;R-HSA-168256 Immune System;R-HSA-6798695 Neutrophil degranulation	https://reactome.org/PathwayBrowser/#/R-HSA-168249;https://reactome.org/PathwayBrowser/#/R-HSA-168256;https://reactome.org/PathwayBrowser/#/R-HSA-6798695	XENOBIOTIC METABOLISM	https://www.gsea-msigdb.org/gsea/msigdb/cards/HALLMARK_XENOBIOTIC_METABOLISM
O00267	Transcription elongation factor SPT5 OS=Homo sapiens OX=9606 GN=SUPT5H PE=1 SV=1	SUPT5H	1.07601	None	121	33.9	24	24	24	369810	397920	0.963386	1.03661	nucleus	K15172	SUPT5H; transcription elongation factor SPT5	hsa03250 Viral life cycle - HIV-1	GO:0000122 negative regulation of transcription by RNA polymerase II; GO:0001764 neuron migration; GO:0001959 regulation of cytokine-mediated signaling pathway; GO:0001961 positive regulation of cytokine-mediated signaling pathway; GO:0002376 immune system process; GO:0002520 immune system development; GO:0002682 regulation of immune system process; GO:0002684 positive regulation of immune system…	GO:0005622 intracellular anatomical structure; GO:0005634 nucleus; GO:0005654 nucleoplasm; GO:0005694 chromosome; GO:0005700 polytene chromosome; GO:0005703 polytene chromosome puff; GO:0005705 polytene chromosome interband; GO:0008023 transcription elongation factor complex; GO:0031974 membrane-enclosed lumen; GO:0031981 nuclear lumen; GO:0032044 DSIF complex; GO:0032991 protein-containing compl…	GO:0003676 nucleic acid binding; GO:0003677 DNA binding; GO:0003682 chromatin binding; GO:0003723 RNA binding; GO:0003729 mRNA binding; GO:0005488 binding; GO:0005515 protein binding; GO:0019899 enzyme binding; GO:0046982 protein heterodimerization activity; GO:0046983 protein dimerization activity; GO:0097159 organic cyclic compound binding; GO:1901363 heterocyclic compound binding;	PF11942	PF11942 Spt5 transcription elongation factor, acidic N-terminal	K	KOG1999	RNA polymerase II transcription elongation factor DSIF/SUPT5H/SPT5	WP3414 INITIATION OF TRANSCRIPTION AND TRANSLATION ELONGATION AT THE HIV1 LTR;WP411 MRNA PROCESSING	http://www.wikipathways.org/instance/WP3414_r106735;http://www.wikipathways.org/instance/WP411_r117160	Transcription factor	R-HSA-112382 Formation of RNA Pol II elongation complex ;R-HSA-113418 Formation of the Early Elongation Complex;R-HSA-162587 HIV Life Cycle;R-HSA-162599 Late Phase of HIV Life Cycle;R-HSA-162906 HIV Infection;R-HSA-1643685 Disease;R-HSA-167152 Formation of HIV elongation complex in the absence of HIV Tat;R-HSA-167158 Formation of the HIV-1 Early Elongation Complex;R-HSA-167160 RNA Pol II CTD phos…	https://reactome.org/PathwayBrowser/#/R-HSA-112382;https://reactome.org/PathwayBrowser/#/R-HSA-113418;https://reactome.org/PathwayBrowser/#/R-HSA-162587;https://reactome.org/PathwayBrowser/#/R-HSA-162599;https://reactome.org/PathwayBrowser/#/R-HSA-162906;https://reactome.org/PathwayBrowser/#/R-HSA-1643685;https://reactome.org/PathwayBrowser/#/R-HSA-167152;https://reactome.org/PathwayBrowser/#/R-H…	DNA REPAIR	https://www.gsea-msigdb.org/gsea/msigdb/cards/HALLMARK_DNA_REPAIR
O00268	Transcription initiation factor TFIID subunit 4 OS=Homo sapiens OX=9606 GN=TAF4 PE=1 SV=2	TAF4	1.02865	None	110.11	10.9	7	6	7	116230	119560	0.985877	1.01412	nucleus	K03129	TAF4; transcription initiation factor TFIID subunit 4	hsa03022 Basal transcription factors; hsa05016 Huntington disease	GO:0006139 nucleobase-containing compound metabolic process; GO:0006351 transcription, DNA-templated; GO:0006352 DNA-templated transcription, initiation; GO:0006355 regulation of transcription, DNA-templated; GO:0006357 regulation of transcription by RNA polymerase II; GO:0006366 transcription by RNA polymerase II; GO:0006367 transcription initiation from RNA polymerase II promoter; GO:0006725 ce…	GO:0000123 histone acetyltransferase complex; GO:0000228 nuclear chromosome; GO:0000428 DNA-directed RNA polymerase complex; GO:0000785 chromatin; GO:0001650 fibrillar center; GO:0005622 intracellular anatomical structure; GO:0005634 nucleus; GO:0005654 nucleoplasm; GO:0005667 transcription regulator complex; GO:0005669 transcription factor TFIID complex; GO:0005694 chromosome; GO:0005730 nucleol…	GO:0003676 nucleic acid binding; GO:0003677 DNA binding; GO:0003712 transcription coregulator activity; GO:0003713 transcription coactivator activity; GO:0005102 signaling receptor binding; GO:0005488 binding; GO:0005515 protein binding; GO:0008134 transcription factor binding; GO:0017162 aryl hydrocarbon receptor binding; GO:0051059 NF-kappaB binding; GO:0097159 organic cyclic compound binding; …			K	KOG2341	TATA box binding protein (TBP)-associated factor, RNA polymerase II			Transcription factor	R-HSA-162587 HIV Life Cycle;R-HSA-162599 Late Phase of HIV Life Cycle;R-HSA-162906 HIV Infection;R-HSA-1643685 Disease;R-HSA-167161 HIV Transcription Initiation;R-HSA-167162 RNA Polymerase II HIV Promoter Escape;R-HSA-167172 Transcription of the HIV genome;R-HSA-212436 Generic Transcription Pathway;R-HSA-3700989 Transcriptional Regulation by TP53;R-HSA-5633007 Regulation of TP53 Activity;R-HSA-56…	https://reactome.org/PathwayBrowser/#/R-HSA-162587;https://reactome.org/PathwayBrowser/#/R-HSA-162599;https://reactome.org/PathwayBrowser/#/R-HSA-162906;https://reactome.org/PathwayBrowser/#/R-HSA-1643685;https://reactome.org/PathwayBrowser/#/R-HSA-167161;https://reactome.org/PathwayBrowser/#/R-HSA-167162;https://reactome.org/PathwayBrowser/#/R-HSA-167172;https://reactome.org/PathwayBrowser/#/R-H…
O00273	DNA fragmentation factor subunit alpha OS=Homo sapiens OX=9606 GN=DFFA PE=1 SV=1	DFFA	0.867956	None	36.521	39	10	10	10	326180	283110	1.07069	0.929311	nucleus	K02310	DFFA; DNA fragmentation factor, 45 kD, alpha subunit	hsa04210 Apoptosis	GO:0000737 DNA catabolic process, endonucleolytic; GO:0006139 nucleobase-containing compound metabolic process; GO:0006259 DNA metabolic process; GO:0006308 DNA catabolic process; GO:0006309 apoptotic DNA fragmentation; GO:0006457 protein folding; GO:0006725 cellular aromatic compound metabolic process; GO:0006807 nitrogen compound metabolic process; GO:0006915 apoptotic process; GO:0006921 cellu…	GO:0000228 nuclear chromosome; GO:0000785 chromatin; GO:0005622 intracellular anatomical structure; GO:0005634 nucleus; GO:0005654 nucleoplasm; GO:0005694 chromosome; GO:0005737 cytoplasm; GO:0005829 cytosol; GO:0005886 plasma membrane; GO:0016020 membrane; GO:0031974 membrane-enclosed lumen; GO:0031981 nuclear lumen; GO:0043226 organelle; GO:0043227 membrane-bounded organelle; GO:0043228 non-mem…	GO:0004857 enzyme inhibitor activity; GO:0005488 binding; GO:0005515 protein binding; GO:0019904 protein domain specific binding; GO:0030234 enzyme regulator activity; GO:0044183 protein folding chaperone; GO:0060703 deoxyribonuclease inhibitor activity; GO:0098772 molecular function regulator;	PF02017; PF09033	PF02017 CIDE-N domain; PF09033 DNA Fragmentation factor 45kDa, C terminal domain				WP4298 ACUTE VIRAL MYOCARDITIS;WP254 APOPTOSIS;WP1772 APOPTOSIS MODULATION AND SIGNALING;WP314 FAS LIGAND PATHWAY AND STRESS INDUCTION OF HEAT SHOCK PROTEINS	http://www.wikipathways.org/instance/WP4298_r120527;http://www.wikipathways.org/instance/WP254_r118382;http://www.wikipathways.org/instance/WP1772_r120736;http://www.wikipathways.org/instance/WP314_r116694		R-HSA-109581 Apoptosis;R-HSA-140342 Apoptosis induced DNA fragmentation;R-HSA-5357801 Programmed Cell Death;R-HSA-75153 Apoptotic execution phase	https://reactome.org/PathwayBrowser/#/R-HSA-109581;https://reactome.org/PathwayBrowser/#/R-HSA-140342;https://reactome.org/PathwayBrowser/#/R-HSA-5357801;https://reactome.org/PathwayBrowser/#/R-HSA-75153	APOPTOSIS	https://www.gsea-msigdb.org/gsea/msigdb/cards/HALLMARK_APOPTOSIS
O00287	Regulatory factor X-associated protein OS=Homo sapiens OX=9606 GN=RFXAP PE=1 SV=1	RFXAP	1.10772	None	28.232	13.2	2	2	2	28305	31354	0.948893	1.05111	nucleus	K08063	RFXAP; regulatory factor X-associated protein	hsa05152 Tuberculosis; hsa04612 Antigen processing and presentation; hsa05340 Primary immunodeficiency	GO:0006355 regulation of transcription, DNA-templated; GO:0009889 regulation of biosynthetic process; GO:0009891 positive regulation of biosynthetic process; GO:0009893 positive regulation of metabolic process; GO:0010468 regulation of gene expression; GO:0010556 regulation of macromolecule biosynthetic process; GO:0010557 positive regulation of macromolecule biosynthetic process; GO:0010604 posi…	GO:0005622 intracellular anatomical structure; GO:0005634 nucleus; GO:0005654 nucleoplasm; GO:0016604 nuclear body; GO:0016607 nuclear speck; GO:0031974 membrane-enclosed lumen; GO:0031981 nuclear lumen; GO:0043226 organelle; GO:0043227 membrane-bounded organelle; GO:0043229 intracellular organelle; GO:0043231 intracellular membrane-bounded organelle; GO:0043233 organelle lumen; GO:0070013 intrac…	GO:0003676 nucleic acid binding; GO:0003677 DNA binding; GO:0003700 DNA-binding transcription factor activity; GO:0003712 transcription coregulator activity; GO:0003713 transcription coactivator activity; GO:0005488 binding; GO:0097159 organic cyclic compound binding; GO:0140110 transcription regulator activity; GO:1901363 heterocyclic compound binding;	PF15289	PF15289 Regulatory factor X-associated C-terminal binding domain						Transcription factor
O00291	Huntingtin-interacting protein 1 OS=Homo sapiens OX=9606 GN=HIP1 PE=1 SV=5	HIP1	0.642142	Down	116.22	6.7	5	4	4	132790	85270	1.21792	0.782078	nucleus	K04559	HIP1; huntingtin interacting protein 1	hsa05016 Huntington disease; hsa05022 Pathways of neurodegeneration - multiple diseases	GO:0006810 transport; GO:0006839 mitochondrial transport; GO:0006886 intracellular protein transport; GO:0006897 endocytosis; GO:0006898 receptor-mediated endocytosis; GO:0006915 apoptotic process; GO:0006919 activation of cysteine-type endopeptidase activity involved in apoptotic process; GO:0006996 organelle organization; GO:0007005 mitochondrion organization; GO:0007006 mitochondrial membrane …	GO:0001726 ruffle; GO:0005622 intracellular anatomical structure; GO:0005634 nucleus; GO:0005737 cytoplasm; GO:0005794 Golgi apparatus; GO:0005829 cytosol; GO:0005856 cytoskeleton; GO:0005886 plasma membrane; GO:0009898 cytoplasmic side of plasma membrane; GO:0012505 endomembrane system; GO:0012506 vesicle membrane; GO:0014069 postsynaptic density; GO:0016020 membrane; GO:0019897 extrinsic compon…	GO:0003779 actin binding; GO:0005102 signaling receptor binding; GO:0005154 epidermal growth factor receptor binding; GO:0005198 structural molecule activity; GO:0005200 structural constituent of cytoskeleton; GO:0005488 binding; GO:0005515 protein binding; GO:0005543 phospholipid binding; GO:0005546 phosphatidylinositol-4,5-bisphosphate binding; GO:0005547 phosphatidylinositol-3,4,5-trisphosphat…	PF07651	PF07651 ANTH domain	Z	KOG0980	Actin-binding protein SLA2/Huntingtin-interacting protein Hip1				R-HSA-1643685 Disease;R-HSA-199991 Membrane Trafficking;R-HSA-5653656 Vesicle-mediated transport;R-HSA-5663202 Diseases of signal transduction by growth factor receptors and second messengers;R-HSA-8856828 Clathrin-mediated endocytosis;R-HSA-9700206 Signaling by ALK in cancer;R-HSA-9700645 ALK mutants bind TKIs;R-HSA-9725370 Signaling by ALK fusions and activated point mutants	https://reactome.org/PathwayBrowser/#/R-HSA-1643685;https://reactome.org/PathwayBrowser/#/R-HSA-199991;https://reactome.org/PathwayBrowser/#/R-HSA-5653656;https://reactome.org/PathwayBrowser/#/R-HSA-5663202;https://reactome.org/PathwayBrowser/#/R-HSA-8856828;https://reactome.org/PathwayBrowser/#/R-HSA-9700206;https://reactome.org/PathwayBrowser/#/R-HSA-9700645;https://reactome.org/PathwayBrowser/…
O00299	Chloride intracellular channel protein 1 OS=Homo sapiens OX=9606 GN=CLIC1 PE=1 SV=4	CLIC1	0.944327	None	26.922	79.3	15	15	15	3585200	3385600	1.02863	0.971366	cytoplasm	K05021			GO:0006810 transport; GO:0006811 ion transport; GO:0006820 anion transport; GO:0006821 chloride transport; GO:0007154 cell communication; GO:0007165 signal transduction; GO:0009987 cellular process; GO:0015698 inorganic anion transport; GO:0023052 signaling; GO:0030278 regulation of ossification; GO:0034220 ion transmembrane transport; GO:0042391 regulation of membrane potential; GO:0045595 regul…	GO:0005576 extracellular region; GO:0005615 extracellular space; GO:0005622 intracellular anatomical structure; GO:0005634 nucleus; GO:0005635 nuclear envelope; GO:0005737 cytoplasm; GO:0005739 mitochondrion; GO:0005903 brush border; GO:0012505 endomembrane system; GO:0031967 organelle envelope; GO:0031975 envelope; GO:0031982 vesicle; GO:0043226 organelle; GO:0043227 membrane-bounded organelle; …	GO:0005215 transporter activity; GO:0005216 ion channel activity; GO:0005244 voltage-gated ion channel activity; GO:0005247 voltage-gated chloride channel activity; GO:0005253 anion channel activity; GO:0005254 chloride channel activity; GO:0008308 voltage-gated anion channel activity; GO:0008509 anion transmembrane transporter activity; GO:0015075 ion transmembrane transporter activity; GO:00151…	PF13409; PF13410	PF13409 Glutathione S-transferase, N-terminal domain; PF13410 Glutathione S-transferase, C-terminal domain	P	KOG1422	Intracellular Cl- channel CLIC, contains GST domain	WP3888 VEGFAVEGFR2 SIGNALING PATHWAY	http://www.wikipathways.org/instance/WP3888_r116782
O00303	Eukaryotic translation initiation factor 3 subunit F OS=Homo sapiens OX=9606 GN=EIF3F PE=1 SV=1	EIF3F	0.942327	None	37.563	35.6	11	11	11	1068100	1006500	1.02969	0.970308	mitochondria	K03249			GO:0006412 translation; GO:0006413 translational initiation; GO:0006464 cellular protein modification process; GO:0006508 proteolysis; GO:0006518 peptide metabolic process; GO:0006807 nitrogen compound metabolic process; GO:0008152 metabolic process; GO:0008593 regulation of Notch signaling pathway; GO:0009058 biosynthetic process; GO:0009059 macromolecule biosynthetic process; GO:0009966 regulat…	GO:0005622 intracellular anatomical structure; GO:0005737 cytoplasm; GO:0005829 cytosol; GO:0005852 eukaryotic translation initiation factor 3 complex; GO:0032991 protein-containing complex; GO:0071541 eukaryotic translation initiation factor 3 complex, eIF3m;	GO:0003676 nucleic acid binding; GO:0003723 RNA binding; GO:0003743 translation initiation factor activity; GO:0003824 catalytic activity; GO:0004843 thiol-dependent deubiquitinase; GO:0005488 binding; GO:0005515 protein binding; GO:0008135 translation factor activity, RNA binding; GO:0008233 peptidase activity; GO:0008234 cysteine-type peptidase activity; GO:0016787 hydrolase activity; GO:001978…			J	KOG2975	Translation initiation factor 3, subunit f (eIF-3f)	WP5027 NSP1 FROM SARSCOV2 INHIBITS TRANSLATION INITIATION IN THE HOST CELL;WP107 TRANSLATION FACTORS;WP3888 VEGFAVEGFR2 SIGNALING PATHWAY	http://www.wikipathways.org/instance/WP5027_r120060;http://www.wikipathways.org/instance/WP107_r117851;http://www.wikipathways.org/instance/WP3888_r116782		R-HSA-156827 L13a-mediated translational silencing of Ceruloplasmin expression;R-HSA-392499 Metabolism of proteins;R-HSA-72613 Eukaryotic Translation Initiation;R-HSA-72649 Translation initiation complex formation;R-HSA-72662 Activation of the mRNA upon binding of the cap-binding complex and eIFs, and subsequent binding to 43S;R-HSA-72689 Formation of a pool of free 40S subunits;R-HSA-72695 Forma…	https://reactome.org/PathwayBrowser/#/R-HSA-156827;https://reactome.org/PathwayBrowser/#/R-HSA-392499;https://reactome.org/PathwayBrowser/#/R-HSA-72613;https://reactome.org/PathwayBrowser/#/R-HSA-72649;https://reactome.org/PathwayBrowser/#/R-HSA-72662;https://reactome.org/PathwayBrowser/#/R-HSA-72689;https://reactome.org/PathwayBrowser/#/R-HSA-72695;https://reactome.org/PathwayBrowser/#/R-HSA-727…
O00311	Cell division cycle 7-related protein kinase OS=Homo sapiens OX=9606 GN=CDC7 PE=1 SV=1	CDC7	1.17197	None	63.887	3.3	2	2	2	357100	418510	0.920824	1.07918	cytoplasm	K02214	CDC7; cell division control protein 7 [EC:2.7.11.1]	hsa04110 Cell cycle	GO:0000003 reproduction; GO:0000082 G1/S transition of mitotic cell cycle; GO:0000278 mitotic cell cycle; GO:0000724 double-strand break repair via homologous recombination; GO:0000725 recombinational repair; GO:0000727 double-strand break repair via break-induced replication; GO:0002064 epithelial cell development; GO:0002065 columnar/cuboidal epithelial cell differentiation; GO:0002066 columnar…	GO:0005576 extracellular region; GO:0005622 intracellular anatomical structure; GO:0005634 nucleus; GO:0005654 nucleoplasm; GO:0005737 cytoplasm; GO:0005819 spindle; GO:0005856 cytoskeleton; GO:0015630 microtubule cytoskeleton; GO:0031431 Dbf4-dependent protein kinase complex; GO:0031974 membrane-enclosed lumen; GO:0031981 nuclear lumen; GO:0032991 protein-containing complex; GO:0043226 organelle…	GO:0003824 catalytic activity; GO:0004672 protein kinase activity; GO:0004674 protein serine/threonine kinase activity; GO:0016301 kinase activity; GO:0016740 transferase activity; GO:0016772 transferase activity, transferring phosphorus-containing groups; GO:0016773 phosphotransferase activity, alcohol group as acceptor; GO:0035173 histone kinase activity; GO:0140096 catalytic activity, acting o…	PF00069	PF00069 Protein kinase domain	L	KOG1167	Serine/threonine protein kinase of the CDC7 subfamily involved in DNA synthesis, repair and recombination	WP179 CELL CYCLE;WP466 DNA REPLICATION;WP2446 RETINOBLASTOMA GENE IN CANCER	http://www.wikipathways.org/instance/WP179_r120742;http://www.wikipathways.org/instance/WP466_r117096;http://www.wikipathways.org/instance/WP2446_r116593		R-HSA-1640170 Cell Cycle;R-HSA-176187 Activation of ATR in response to replication stress;R-HSA-212436 Generic Transcription Pathway;R-HSA-453279 Mitotic G1 phase and G1/S transition;R-HSA-68962 Activation of the pre-replicative complex;R-HSA-69002 DNA Replication Pre-Initiation;R-HSA-69206 G1/S Transition;R-HSA-69278 Cell Cycle, Mitotic;R-HSA-69306 DNA Replication;R-HSA-69481 G2/M Checkpoints;R-…	https://reactome.org/PathwayBrowser/#/R-HSA-1640170;https://reactome.org/PathwayBrowser/#/R-HSA-176187;https://reactome.org/PathwayBrowser/#/R-HSA-212436;https://reactome.org/PathwayBrowser/#/R-HSA-453279;https://reactome.org/PathwayBrowser/#/R-HSA-68962;https://reactome.org/PathwayBrowser/#/R-HSA-69002;https://reactome.org/PathwayBrowser/#/R-HSA-69206;https://reactome.org/PathwayBrowser/#/R-HSA-…	G2M CHECKPOINT	https://www.gsea-msigdb.org/gsea/msigdb/cards/HALLMARK_G2M_CHECKPOINT
O00330	Pyruvate dehydrogenase protein X component, mitochondrial OS=Homo sapiens OX=9606 GN=PDHX PE=1 SV=3	PDHX	0.929597	None	54.122	17.4	6	6	6	211070	196210	1.03649	0.963514	mitochondria	K13997	PDHX; dihydrolipoamide dehydrogenase-binding protein of pyruvate dehydrogenase complex	hsa01100 Metabolic pathways	GO:0006082 organic acid metabolic process; GO:0006084 acetyl-CoA metabolic process; GO:0006085 acetyl-CoA biosynthetic process; GO:0006086 acetyl-CoA biosynthetic process from pyruvate; GO:0006090 pyruvate metabolic process; GO:0006139 nucleobase-containing compound metabolic process; GO:0006163 purine nucleotide metabolic process; GO:0006164 purine nucleotide biosynthetic process; GO:0006637 acy…	GO:0005622 intracellular anatomical structure; GO:0005737 cytoplasm; GO:0005739 mitochondrion; GO:0005759 mitochondrial matrix; GO:0031974 membrane-enclosed lumen; GO:0032991 protein-containing complex; GO:0043226 organelle; GO:0043227 membrane-bounded organelle; GO:0043229 intracellular organelle; GO:0043231 intracellular membrane-bounded organelle; GO:0043233 organelle lumen; GO:0045254 pyruvat…		PF00364	PF00364 Biotin-requiring enzyme	C	KOG0557	Dihydrolipoamide acetyltransferase	WP3925 AMINO ACID METABOLISM;WP4236 KREBS CYCLE DISORDERS	http://www.wikipathways.org/instance/WP3925_r117062;http://www.wikipathways.org/instance/WP4236_r120410		R-HSA-1428517 The citric acid (TCA) cycle and respiratory electron transport;R-HSA-1430728 Metabolism;R-HSA-162582 Signal Transduction;R-HSA-204174 Regulation of pyruvate dehydrogenase (PDH) complex;R-HSA-389661 Glyoxylate metabolism and glycine degradation;R-HSA-5362517 Signaling by Retinoic Acid;R-HSA-70268 Pyruvate metabolism;R-HSA-71291 Metabolism of amino acids and derivatives;R-HSA-71406 Py…	https://reactome.org/PathwayBrowser/#/R-HSA-1428517;https://reactome.org/PathwayBrowser/#/R-HSA-1430728;https://reactome.org/PathwayBrowser/#/R-HSA-162582;https://reactome.org/PathwayBrowser/#/R-HSA-204174;https://reactome.org/PathwayBrowser/#/R-HSA-389661;https://reactome.org/PathwayBrowser/#/R-HSA-5362517;https://reactome.org/PathwayBrowser/#/R-HSA-70268;https://reactome.org/PathwayBrowser/#/R-…	OXIDATIVE PHOSPHORYLATION	https://www.gsea-msigdb.org/gsea/msigdb/cards/HALLMARK_OXIDATIVE_PHOSPHORYLATION
O00399	Dynactin subunit 6 OS=Homo sapiens OX=9606 GN=DCTN6 PE=1 SV=1	DCTN6	0.735604	None	20.747	22.6	3	3	3	184420	135660	1.15234	0.847663	cytoplasm	K10428	DCTN6; dynactin 6	hsa05132 Salmonella infection; hsa05016 Huntington disease; hsa05022 Pathways of neurodegeneration - multiple diseases; hsa04962 Vasopressin-regulated water reabsorption; hsa05014 Amyotrophic lateral sclerosis	GO:0000226 microtubule cytoskeleton organization; GO:0000278 mitotic cell cycle; GO:0002376 immune system process; GO:0002478 antigen processing and presentation of exogenous peptide antigen; GO:0002495 antigen processing and presentation of peptide antigen via MHC class II; GO:0002504 antigen processing and presentation of peptide or polysaccharide antigen via MHC class II; GO:0006629 lipid meta…	GO:0005622 intracellular anatomical structure; GO:0005737 cytoplasm; GO:0005739 mitochondrion; GO:0005813 centrosome; GO:0005815 microtubule organizing center; GO:0005829 cytosol; GO:0005856 cytoskeleton; GO:0005869 dynactin complex; GO:0005875 microtubule associated complex; GO:0015629 actin cytoskeleton; GO:0015630 microtubule cytoskeleton; GO:0032991 protein-containing complex; GO:0043226 orga…	GO:0003824 catalytic activity; GO:0005488 binding; GO:0044877 protein-containing complex binding; GO:0070840 dynein complex binding;			UZ	KOG4042	Dynactin subunit p27/WS-3, involved in transport of organelles along microtubules	WP5085 VASOPRESSINREGULATED WATER REABSORPTION	http://www.wikipathways.org/instance/WP5085_r119785		R-HSA-1280218 Adaptive Immune System;R-HSA-168256 Immune System;R-HSA-199977 ER to Golgi Anterograde Transport;R-HSA-199991 Membrane Trafficking;R-HSA-2132295 MHC class II antigen presentation;R-HSA-2262752 Cellular responses to stress;R-HSA-3371497 HSP90 chaperone cycle for steroid hormone receptors (SHR) in the presence of ligand;R-HSA-392499 Metabolism of proteins;R-HSA-446203 Asparagine N-lin…	https://reactome.org/PathwayBrowser/#/R-HSA-1280218;https://reactome.org/PathwayBrowser/#/R-HSA-168256;https://reactome.org/PathwayBrowser/#/R-HSA-199977;https://reactome.org/PathwayBrowser/#/R-HSA-199991;https://reactome.org/PathwayBrowser/#/R-HSA-2132295;https://reactome.org/PathwayBrowser/#/R-HSA-2262752;https://reactome.org/PathwayBrowser/#/R-HSA-3371497;https://reactome.org/PathwayBrowser/#/…
O00400	Acetyl-coenzyme A transporter 1 OS=Homo sapiens OX=9606 GN=SLC33A1 PE=1 SV=1	SLC33A1	0.974901	None	60.908	6.7	3	3	3	90284	88018	1.01271	0.987291	plasma membrane	K03372	SLC33A1; MFS transporter, PAT family, solute carrier family 33 (acetyl-CoA transportor), member 1 [EC:2.3.1.-]	hsa00604 Glycosphingolipid biosynthesis - ganglio series; hsa01100 Metabolic pathways	GO:0006355 regulation of transcription, DNA-templated; GO:0006357 regulation of transcription by RNA polymerase II; GO:0006810 transport; GO:0006811 ion transport; GO:0006812 cation transport; GO:0006820 anion transport; GO:0006862 nucleotide transport; GO:0007154 cell communication; GO:0007165 signal transduction; GO:0007166 cell surface receptor signaling pathway; GO:0007167 enzyme linked recep…	GO:0000139 Golgi membrane; GO:0005622 intracellular anatomical structure; GO:0005737 cytoplasm; GO:0005783 endoplasmic reticulum; GO:0005789 endoplasmic reticulum membrane; GO:0005794 Golgi apparatus; GO:0005886 plasma membrane; GO:0005887 integral component of plasma membrane; GO:0012505 endomembrane system; GO:0016020 membrane; GO:0016021 integral component of membrane; GO:0031090 organelle mem…	GO:0000295 adenine nucleotide transmembrane transporter activity; GO:0005215 transporter activity; GO:0005346 purine ribonucleotide transmembrane transporter activity; GO:0008324 cation transmembrane transporter activity; GO:0008509 anion transmembrane transporter activity; GO:0008514 organic anion transmembrane transporter activity; GO:0008521 acetyl-CoA transmembrane transporter activity; GO:00…			P	KOG3574	Acetyl-CoA transporter	WP1423 GANGLIO SPHINGOLIPID METABOLISM	http://www.wikipathways.org/instance/WP1423_r117518		R-HSA-1643685 Disease;R-HSA-382551 Transport of small molecules;R-HSA-425397 Transport of vitamins, nucleosides, and related molecules;R-HSA-425407 SLC-mediated transmembrane transport;R-HSA-5619061 Defective SLC33A1 causes spastic paraplegia 42 (SPG42);R-HSA-5619102 SLC transporter disorders;R-HSA-5619115 Disorders of transmembrane transporters	https://reactome.org/PathwayBrowser/#/R-HSA-1643685;https://reactome.org/PathwayBrowser/#/R-HSA-382551;https://reactome.org/PathwayBrowser/#/R-HSA-425397;https://reactome.org/PathwayBrowser/#/R-HSA-425407;https://reactome.org/PathwayBrowser/#/R-HSA-5619061;https://reactome.org/PathwayBrowser/#/R-HSA-5619102;https://reactome.org/PathwayBrowser/#/R-HSA-5619115
O00401	Actin nucleation-promoting factor WASL OS=Homo sapiens OX=9606 GN=WASL PE=1 SV=2	WASL	1.5136	Up	54.826	21.8	5	5	5	95653	144780	0.795673	1.20433	mitochondria	K23612	WASL; neural Wiskott-Aldrich syndrome protein	hsa05131 Shigellosis; hsa05132 Salmonella infection; hsa04810 Regulation of actin cytoskeleton; hsa05100 Bacterial invasion of epithelial cells; hsa05130 Pathogenic Escherichia coli infection; hsa04520 Adherens junction; hsa04144 Endocytosis; hsa05135 Yersinia infection	GO:0000003 reproduction; GO:0000226 microtubule cytoskeleton organization; GO:0000768 syncytium formation by plasma membrane fusion; GO:0000902 cell morphogenesis; GO:0000904 cell morphogenesis involved in differentiation; GO:0001578 microtubule bundle formation; GO:0001667 ameboidal-type cell migration; GO:0002009 morphogenesis of an epithelium; GO:0002064 epithelial cell development; GO:0002252…	GO:0000139 Golgi membrane; GO:0005622 intracellular anatomical structure; GO:0005634 nucleus; GO:0005737 cytoplasm; GO:0005794 Golgi apparatus; GO:0005829 cytosol; GO:0005856 cytoskeleton; GO:0005886 plasma membrane; GO:0005902 microvillus; GO:0005938 cell cortex; GO:0012505 endomembrane system; GO:0012506 vesicle membrane; GO:0015629 actin cytoskeleton; GO:0016020 membrane; GO:0016028 rhabdomere…	GO:0003779 actin binding; GO:0005198 structural molecule activity; GO:0005488 binding; GO:0005515 protein binding; GO:0005519 cytoskeletal regulatory protein binding; GO:0008092 cytoskeletal protein binding; GO:0019899 enzyme binding; GO:0030234 enzyme regulator activity; GO:0030695 GTPase regulator activity; GO:0031267 small GTPase binding; GO:0042802 identical protein binding; GO:0051020 GTPase…	PF00568; PF00786	PF00568 WH1 domain; PF00786 P21-Rho-binding domain	TZ	KOG3671	Actin regulatory protein (Wiskott-Aldrich syndrome protein)	WP3929 CHEMOKINE SIGNALING PATHWAY;WP3850 FACTORS AND PATHWAYS AFFECTING INSULINLIKE GROWTH FACTOR IGF1AKT SIGNALING;WP524 G13 SIGNALING PATHWAY;WP2272 PATHOGENIC ESCHERICHIA COLI INFECTION;WP2526 PDGF PATHWAY	http://www.wikipathways.org/instance/WP3929_r119247;http://www.wikipathways.org/instance/WP3850_r110688;http://www.wikipathways.org/instance/WP524_r117113;http://www.wikipathways.org/instance/WP2272_r118427;http://www.wikipathways.org/instance/WP2526_r117815		R-HSA-1266738 Developmental Biology;R-HSA-1430728 Metabolism;R-HSA-1500931 Cell-Cell communication;R-HSA-162582 Signal Transduction;R-HSA-1643685 Disease;R-HSA-168249 Innate Immune System;R-HSA-168256 Immune System;R-HSA-194315 Signaling by Rho GTPases;R-HSA-195258 RHO GTPase Effectors;R-HSA-199991 Membrane Trafficking;R-HSA-202131 Metabolism of nitric oxide: NOS3 activation and regulation;R-HSA-…	https://reactome.org/PathwayBrowser/#/R-HSA-1266738;https://reactome.org/PathwayBrowser/#/R-HSA-1430728;https://reactome.org/PathwayBrowser/#/R-HSA-1500931;https://reactome.org/PathwayBrowser/#/R-HSA-162582;https://reactome.org/PathwayBrowser/#/R-HSA-1643685;https://reactome.org/PathwayBrowser/#/R-HSA-168249;https://reactome.org/PathwayBrowser/#/R-HSA-168256;https://reactome.org/PathwayBrowser/#/…	APICAL JUNCTION;MITOTIC SPINDLE	https://www.gsea-msigdb.org/gsea/msigdb/cards/HALLMARK_APICAL_JUNCTION;https://www.gsea-msigdb.org/gsea/msigdb/cards/HALLMARK_MITOTIC_SPINDLE
O00410	Importin-5 OS=Homo sapiens OX=9606 GN=IPO5 PE=1 SV=4	IPO5	1.04125	None	123.63	53.4	41	39	41	2346900	2443700	0.979794	1.02021	cytoplasm	K20222	IPO5; importin-5	hsa03013 Nucleocytoplasmic transport	GO:0000079 regulation of cyclin-dependent protein serine/threonine kinase activity; GO:0001101 response to acid chemical; GO:0001932 regulation of protein phosphorylation; GO:0001933 negative regulation of protein phosphorylation; GO:0006469 negative regulation of protein kinase activity; GO:0006606 protein import into nucleus; GO:0006607 NLS-bearing protein import into nucleus; GO:0006610 riboso…	GO:0005622 intracellular anatomical structure; GO:0005634 nucleus; GO:0005635 nuclear envelope; GO:0005643 nuclear pore; GO:0005730 nucleolus; GO:0005737 cytoplasm; GO:0005829 cytosol; GO:0012505 endomembrane system; GO:0016020 membrane; GO:0031090 organelle membrane; GO:0031965 nuclear membrane; GO:0031967 organelle envelope; GO:0031974 membrane-enclosed lumen; GO:0031975 envelope; GO:0031981 nu…	GO:0004857 enzyme inhibitor activity; GO:0005048 signal sequence binding; GO:0005095 GTPase inhibitor activity; GO:0005215 transporter activity; GO:0005488 binding; GO:0005515 protein binding; GO:0008139 nuclear localization sequence binding; GO:0019899 enzyme binding; GO:0030234 enzyme regulator activity; GO:0030695 GTPase regulator activity; GO:0031267 small GTPase binding; GO:0033218 amide bin…			YU	KOG2171	Karyopherin (importin) beta 3				R-HSA-1643685 Disease;R-HSA-168255 Influenza Infection;R-HSA-168273 Influenza Viral RNA Transcription and Replication;R-HSA-192905 vRNP Assembly;R-HSA-5663205 Infectious disease	https://reactome.org/PathwayBrowser/#/R-HSA-1643685;https://reactome.org/PathwayBrowser/#/R-HSA-168255;https://reactome.org/PathwayBrowser/#/R-HSA-168273;https://reactome.org/PathwayBrowser/#/R-HSA-192905;https://reactome.org/PathwayBrowser/#/R-HSA-5663205
O00411	DNA-directed RNA polymerase, mitochondrial OS=Homo sapiens OX=9606 GN=POLRMT PE=1 SV=2	POLRMT	1.21948	None	138.62	24.1	17	17	17	121790	148520	0.901114	1.09889	nucleus	K10908			GO:0000959 mitochondrial RNA metabolic process; GO:0006139 nucleobase-containing compound metabolic process; GO:0006351 transcription, DNA-templated; GO:0006352 DNA-templated transcription, initiation; GO:0006390 mitochondrial transcription; GO:0006391 transcription initiation from mitochondrial promoter; GO:0006725 cellular aromatic compound metabolic process; GO:0006807 nitrogen compound metabo…	GO:0000428 DNA-directed RNA polymerase complex; GO:0005622 intracellular anatomical structure; GO:0005737 cytoplasm; GO:0005739 mitochondrion; GO:0005759 mitochondrial matrix; GO:0009295 nucleoid; GO:0030880 RNA polymerase complex; GO:0031974 membrane-enclosed lumen; GO:0032991 protein-containing complex; GO:0034245 mitochondrial DNA-directed RNA polymerase complex; GO:0042645 mitochondrial nucle…	GO:0003676 nucleic acid binding; GO:0003677 DNA binding; GO:0003824 catalytic activity; GO:0003899 DNA-directed 5'-3' RNA polymerase activity; GO:0005488 binding; GO:0016740 transferase activity; GO:0016772 transferase activity, transferring phosphorus-containing groups; GO:0016779 nucleotidyltransferase activity; GO:0034062 5'-3' RNA polymerase activity; GO:0043565 sequence-specific DNA binding;…	PF14700	PF14700 DNA-directed RNA polymerase N-terminal	KL	KOG1038	Mitochondrial/chloroplast DNA-directed RNA polymerase RPO41, provides primers for DNA replication-initiation	WP391 MITOCHONDRIAL GENE EXPRESSION	http://www.wikipathways.org/instance/WP391_r117794		R-HSA-1592230 Mitochondrial biogenesis;R-HSA-163282 Mitochondrial transcription initiation;R-HSA-1852241 Organelle biogenesis and maintenance;R-HSA-2151201 Transcriptional activation of mitochondrial biogenesis;R-HSA-74160 Gene expression (Transcription);R-HSA-75944 Transcription from mitochondrial promoters	https://reactome.org/PathwayBrowser/#/R-HSA-1592230;https://reactome.org/PathwayBrowser/#/R-HSA-163282;https://reactome.org/PathwayBrowser/#/R-HSA-1852241;https://reactome.org/PathwayBrowser/#/R-HSA-2151201;https://reactome.org/PathwayBrowser/#/R-HSA-74160;https://reactome.org/PathwayBrowser/#/R-HSA-75944
O00418	Eukaryotic elongation factor 2 kinase OS=Homo sapiens OX=9606 GN=EEF2K PE=1 SV=2	EEF2K	1.58612	Up	82.143	7.9	5	5	5	110080	174600	0.77336	1.22664	cytoplasm,nucleus	K08292	EEF2K; elongation factor 2 kinase [EC:2.7.11.20]	hsa04921 Oxytocin signaling pathway; hsa04152 AMPK signaling pathway	GO:0001932 regulation of protein phosphorylation; GO:0002931 response to ischemia; GO:0006412 translation; GO:0006414 translational elongation; GO:0006464 cellular protein modification process; GO:0006468 protein phosphorylation; GO:0006518 peptide metabolic process; GO:0006793 phosphorus metabolic process; GO:0006796 phosphate-containing compound metabolic process; GO:0006807 nitrogen compound m…	GO:0005622 intracellular anatomical structure; GO:0005737 cytoplasm; GO:0005829 cytosol; GO:0014069 postsynaptic density; GO:0030425 dendrite; GO:0032279 asymmetric synapse; GO:0036477 somatodendritic compartment; GO:0042995 cell projection; GO:0043005 neuron projection; GO:0043197 dendritic spine; GO:0043226 organelle; GO:0044309 neuron spine; GO:0045202 synapse; GO:0097447 dendritic tree; GO:00…	GO:0003676 nucleic acid binding; GO:0003723 RNA binding; GO:0003824 catalytic activity; GO:0004672 protein kinase activity; GO:0004674 protein serine/threonine kinase activity; GO:0004683 calmodulin-dependent protein kinase activity; GO:0004686 elongation factor-2 kinase activity; GO:0005488 binding; GO:0005515 protein binding; GO:0005516 calmodulin binding; GO:0008135 translation factor activity…						WP1403 AMPACTIVATED PROTEIN KINASE AMPK SIGNALING;WP3676 BDNFTRKB SIGNALING;WP107 TRANSLATION FACTORS	http://www.wikipathways.org/instance/WP1403_r116516;http://www.wikipathways.org/instance/WP3676_r116809;http://www.wikipathways.org/instance/WP107_r117851		R-HSA-162582 Signal Transduction;R-HSA-165159 MTOR signalling;R-HSA-166208 mTORC1-mediated signalling	https://reactome.org/PathwayBrowser/#/R-HSA-162582;https://reactome.org/PathwayBrowser/#/R-HSA-165159;https://reactome.org/PathwayBrowser/#/R-HSA-166208
O00422	Histone deacetylase complex subunit SAP18 OS=Homo sapiens OX=9606 GN=SAP18 PE=1 SV=1	SAP18	1.03651	None	17.561	55.6	8	8	8	307290	318510	0.982071	1.01793	nucleus	K14324	SAP18; histone deacetylase complex subunit SAP18	hsa03013 Nucleocytoplasmic transport; hsa03015 mRNA surveillance pathway	GO:0000375 RNA splicing, via transesterification reactions; GO:0000377 RNA splicing, via transesterification reactions with bulged adenosine as nucleophile; GO:0000381 regulation of alternative mRNA splicing, via spliceosome; GO:0000398 mRNA splicing, via spliceosome; GO:0006139 nucleobase-containing compound metabolic process; GO:0006325 chromatin organization; GO:0006355 regulation of transcrip…	GO:0000118 histone deacetylase complex; GO:0000228 nuclear chromosome; GO:0000785 chromatin; GO:0005622 intracellular anatomical structure; GO:0005634 nucleus; GO:0005654 nucleoplasm; GO:0005667 transcription regulator complex; GO:0005694 chromosome; GO:0005737 cytoplasm; GO:0005829 cytosol; GO:0016580 Sin3 complex; GO:0016604 nuclear body; GO:0016607 nuclear speck; GO:0031974 membrane-enclosed l…	GO:0003712 transcription coregulator activity; GO:0003714 transcription corepressor activity; GO:0003824 catalytic activity; GO:0004407 histone deacetylase activity; GO:0005488 binding; GO:0005515 protein binding; GO:0008134 transcription factor binding; GO:0016787 hydrolase activity; GO:0016810 hydrolase activity, acting on carbon-nitrogen (but not peptide) bonds; GO:0016811 hydrolase activity, …			K	KOG3391	Transcriptional co-repressor component	WP47 HEDGEHOG SIGNALING PATHWAY WP47	http://www.wikipathways.org/instance/WP47_r120579		R-HSA-1643685 Disease;R-HSA-212165 Epigenetic regulation of gene expression;R-HSA-3214815 HDACs deacetylate histones;R-HSA-3247509 Chromatin modifying enzymes;R-HSA-427413 NoRC negatively regulates rRNA expression;R-HSA-4839726 Chromatin organization;R-HSA-5250941 Negative epigenetic regulation of rRNA expression;R-HSA-5663205 Infectious disease;R-HSA-74160 Gene expression (Transcription);R-HSA-9…	https://reactome.org/PathwayBrowser/#/R-HSA-1643685;https://reactome.org/PathwayBrowser/#/R-HSA-212165;https://reactome.org/PathwayBrowser/#/R-HSA-3214815;https://reactome.org/PathwayBrowser/#/R-HSA-3247509;https://reactome.org/PathwayBrowser/#/R-HSA-427413;https://reactome.org/PathwayBrowser/#/R-HSA-4839726;https://reactome.org/PathwayBrowser/#/R-HSA-5250941;https://reactome.org/PathwayBrowser/#…
O00425	Insulin-like growth factor 2 mRNA-binding protein 3 OS=Homo sapiens OX=9606 GN=IGF2BP3 PE=1 SV=2	IGF2BP3	1.01874	None	63.704	39.9	17	15	17	1761400	1794400	0.990719	1.00928	cytoplasm	K13197			GO:0000003 reproduction; GO:0000375 RNA splicing, via transesterification reactions; GO:0000377 RNA splicing, via transesterification reactions with bulged adenosine as nucleophile; GO:0000398 mRNA splicing, via spliceosome; GO:0001817 regulation of cytokine production; GO:0005975 carbohydrate metabolic process; GO:0006139 nucleobase-containing compound metabolic process; GO:0006396 RNA processin…	GO:0005622 intracellular anatomical structure; GO:0005634 nucleus; GO:0005737 cytoplasm; GO:0005829 cytosol; GO:0030424 axon; GO:0036477 somatodendritic compartment; GO:0042995 cell projection; GO:0043005 neuron projection; GO:0043025 neuronal cell body; GO:0043226 organelle; GO:0043227 membrane-bounded organelle; GO:0043229 intracellular organelle; GO:0043231 intracellular membrane-bounded organ…	GO:0003676 nucleic acid binding; GO:0003723 RNA binding; GO:0003729 mRNA binding; GO:0003730 mRNA 3'-UTR binding; GO:0005488 binding; GO:0005515 protein binding; GO:0019955 cytokine binding; GO:0045182 translation regulator activity; GO:0048027 mRNA 5'-UTR binding; GO:0097159 organic cyclic compound binding; GO:1901363 heterocyclic compound binding;	PF00076; PF00013	PF00076 RNA recognition motif. (a.k.a. RRM, RBD, or RNP domain); PF00013 KH domain	AR	KOG2193	IGF-II mRNA-binding protein IMP, contains RRM and KH domains				R-HSA-428359 Insulin-like Growth Factor-2 mRNA Binding Proteins (IGF2BPs/IMPs/VICKZs) bind RNA;R-HSA-8953854 Metabolism of RNA	https://reactome.org/PathwayBrowser/#/R-HSA-428359;https://reactome.org/PathwayBrowser/#/R-HSA-8953854
O00429	Dynamin-1-like protein OS=Homo sapiens OX=9606 GN=DNM1L PE=1 SV=2	DNM1L	1.01719	None	81.876	58.7	31	31	31	470490	478580	0.991476	1.00852	cytoplasm	K17065	DNM1L; dynamin 1-like protein [EC:3.6.5.5]	hsa04621 NOD-like receptor signaling pathway; hsa04668 TNF signaling pathway; hsa04217 Necroptosis	GO:0000266 mitochondrial fission; GO:0000278 mitotic cell cycle; GO:0000281 mitotic cytokinesis; GO:0000910 cytokinesis; GO:0001505 regulation of neurotransmitter levels; GO:0001666 response to hypoxia; GO:0001703 gastrulation with mouth forming first; GO:0001836 release of cytochrome c from mitochondria; GO:0001956 positive regulation of neurotransmitter secretion; GO:0002791 regulation of pepti…	GO:0000139 Golgi membrane; GO:0005622 intracellular anatomical structure; GO:0005737 cytoplasm; GO:0005739 mitochondrion; GO:0005740 mitochondrial envelope; GO:0005741 mitochondrial outer membrane; GO:0005777 peroxisome; GO:0005783 endoplasmic reticulum; GO:0005789 endoplasmic reticulum membrane; GO:0005794 Golgi apparatus; GO:0005829 cytosol; GO:0005856 cytoskeleton; GO:0005874 microtubule; GO:0…	GO:0000166 nucleotide binding; GO:0001882 nucleoside binding; GO:0001883 purine nucleoside binding; GO:0003824 catalytic activity; GO:0003924 GTPase activity; GO:0005096 GTPase activator activity; GO:0005488 binding; GO:0005515 protein binding; GO:0005525 GTP binding; GO:0008017 microtubule binding; GO:0008047 enzyme activator activity; GO:0008092 cytoskeletal protein binding; GO:0015631 tubulin …	PF00350	PF00350 Dynamin family	UR	KOG0446	Vacuolar sorting protein VPS1, dynamin, and related proteins	WP4874 CAMKK2 PATHWAY;WP2267 SYNAPTIC VESICLE PATHWAY	http://www.wikipathways.org/instance/WP4874_r117669;http://www.wikipathways.org/instance/WP2267_r117179		R-HSA-109581 Apoptosis;R-HSA-5357801 Programmed Cell Death;R-HSA-75153 Apoptotic execution phase	https://reactome.org/PathwayBrowser/#/R-HSA-109581;https://reactome.org/PathwayBrowser/#/R-HSA-5357801;https://reactome.org/PathwayBrowser/#/R-HSA-75153	APOPTOSIS;PROTEIN SECRETION	https://www.gsea-msigdb.org/gsea/msigdb/cards/HALLMARK_APOPTOSIS;https://www.gsea-msigdb.org/gsea/msigdb/cards/HALLMARK_PROTEIN_SECRETION
O00442	RNA 3'-terminal phosphate cyclase OS=Homo sapiens OX=9606 GN=RTCA PE=1 SV=1	RTCA	1.091	None	39.336	31.4	8	8	8	241420	263390	0.956479	1.04352	endoplasmic reticulum,mitochondria	K01974			GO:0007275 multicellular organism development; GO:0007399 nervous system development; GO:0009987 cellular process; GO:0010721 negative regulation of cell development; GO:0010975 regulation of neuron projection development; GO:0010977 negative regulation of neuron projection development; GO:0022008 neurogenesis; GO:0030154 cell differentiation; GO:0031344 regulation of cell projection organization…	GO:0005622 intracellular anatomical structure; GO:0005634 nucleus; GO:0005654 nucleoplasm; GO:0031974 membrane-enclosed lumen; GO:0031981 nuclear lumen; GO:0043226 organelle; GO:0043227 membrane-bounded organelle; GO:0043229 intracellular organelle; GO:0043231 intracellular membrane-bounded organelle; GO:0043233 organelle lumen; GO:0070013 intracellular organelle lumen;	GO:0003824 catalytic activity; GO:0003963 RNA-3'-phosphate cyclase activity; GO:0009975 cyclase activity; GO:0016874 ligase activity; GO:0016886 ligase activity, forming phosphoric ester bonds; GO:0140098 catalytic activity, acting on RNA;	PF01137; PF05189	PF01137 RNA 3'-terminal phosphate cyclase; PF05189 RNA 3'-terminal phosphate cyclase (RTC), insert domain	A	KOG3980	RNA 3'-terminal phosphate cyclase
O00443	Phosphatidylinositol 4-phosphate 3-kinase C2 domain-containing subunit alpha OS=Homo sapiens OX=9606 GN=PIK3C2A PE=1 SV=2	PIK3C2A	0.966597	None	190.68	4.9	6	6	6	63796	61665	1.01699	0.983015	cytoplasm	K00923	PIK3C2; phosphatidylinositol-4-phosphate 3-kinase [EC:2.7.1.154]	hsa05132 Salmonella infection; hsa04070 Phosphatidylinositol signaling system; hsa00562 Inositol phosphate metabolism; hsa01100 Metabolic pathways	GO:0002119 nematode larval development; GO:0002164 larval development; GO:0003008 system process; GO:0003012 muscle system process; GO:0003013 circulatory system process; GO:0003018 vascular process in circulatory system; GO:0006629 lipid metabolic process; GO:0006644 phospholipid metabolic process; GO:0006650 glycerophospholipid metabolic process; GO:0006661 phosphatidylinositol biosynthetic pro…	GO:0005622 intracellular anatomical structure; GO:0005634 nucleus; GO:0005654 nucleoplasm; GO:0005737 cytoplasm; GO:0005768 endosome; GO:0005829 cytosol; GO:0005886 plasma membrane; GO:0005942 phosphatidylinositol 3-kinase complex; GO:0010008 endosome membrane; GO:0012505 endomembrane system; GO:0016020 membrane; GO:0019898 extrinsic component of membrane; GO:0030139 endocytic vesicle; GO:0031090…	GO:0003824 catalytic activity; GO:0005488 binding; GO:0005515 protein binding; GO:0005543 phospholipid binding; GO:0008289 lipid binding; GO:0016301 kinase activity; GO:0016303 1-phosphatidylinositol-3-kinase activity; GO:0016307 phosphatidylinositol phosphate kinase activity; GO:0016740 transferase activity; GO:0016772 transferase activity, transferring phosphorus-containing groups; GO:0016773 p…	PF00794; PF00792; PF00787; PF00168	PF00794 PI3-kinase family, ras-binding domain; PF00792 Phosphoinositide 3-kinase C2; PF00787 PX domain; PF00168 C2 domain	T	KOG0905	Phosphoinositide 3-kinase	WP3915 ANGIOPOIETINLIKE PROTEIN 8 REGULATORY PATHWAY;WP710 DNA DAMAGE RESPONSE ONLY ATM DEPENDENT;WP3932 FOCAL ADHESION PI3KAKTMTORSIGNALING PATHWAY;WP2261 GLIOBLASTOMA SIGNALING PATHWAYS;WP481 INSULIN SIGNALING;WP3937 MICROGLIA PATHOGEN PHAGOCYTOSIS PATHWAY;WP4787 OSTEOBLAST DIFFERENTIATION AND RELATED DISEASES;WP4971 PHOSPHOINOSITIDES METABOLISM;WP51 REGULATION OF ACTIN CYTOSKELETON	http://www.wikipathways.org/instance/WP3915_r120659;http://www.wikipathways.org/instance/WP710_r116542;http://www.wikipathways.org/instance/WP3932_r120304;http://www.wikipathways.org/instance/WP2261_r118379;http://www.wikipathways.org/instance/WP481_r120562;http://www.wikipathways.org/instance/WP3937_r120792;http://www.wikipathways.org/instance/WP4787_r118872;http://www.wikipathways.org/instance/…		R-HSA-1430728 Metabolism;R-HSA-1483255 PI Metabolism;R-HSA-1483257 Phospholipid metabolism;R-HSA-1660499 Synthesis of PIPs at the plasma membrane;R-HSA-1660514 Synthesis of PIPs at the Golgi membrane;R-HSA-1660516 Synthesis of PIPs at the early endosome membrane;R-HSA-1660517 Synthesis of PIPs at the late endosome membrane;R-HSA-199991 Membrane Trafficking;R-HSA-199992 trans-Golgi Network Vesicle…	https://reactome.org/PathwayBrowser/#/R-HSA-1430728;https://reactome.org/PathwayBrowser/#/R-HSA-1483255;https://reactome.org/PathwayBrowser/#/R-HSA-1483257;https://reactome.org/PathwayBrowser/#/R-HSA-1660499;https://reactome.org/PathwayBrowser/#/R-HSA-1660514;https://reactome.org/PathwayBrowser/#/R-HSA-1660516;https://reactome.org/PathwayBrowser/#/R-HSA-1660517;https://reactome.org/PathwayBrowser…
O00458	Interferon-related developmental regulator 1 OS=Homo sapiens OX=9606 GN=IFRD1 PE=1 SV=4	IFRD1		None	50.268	8.6	2	2	2	0	0			nucleus				GO:0001558 regulation of cell growth; GO:0001709 cell fate determination; GO:0006355 regulation of transcription, DNA-templated; GO:0006357 regulation of transcription by RNA polymerase II; GO:0006950 response to stress; GO:0007275 multicellular organism development; GO:0007399 nervous system development; GO:0007405 neuroblast proliferation; GO:0007518 myoblast fate determination; GO:0008283 cell…	GO:0005622 intracellular anatomical structure; GO:0005634 nucleus; GO:0005737 cytoplasm; GO:0043226 organelle; GO:0043227 membrane-bounded organelle; GO:0043229 intracellular organelle; GO:0043231 intracellular membrane-bounded organelle;	GO:0005488 binding; GO:0005515 protein binding; GO:0008134 transcription factor binding; GO:0061629 RNA polymerase II-specific DNA-binding transcription factor binding;			Z	KOG2842	Interferon-related protein PC4 like	WP516 HYPERTROPHY MODEL	http://www.wikipathways.org/instance/WP516_r117755				MTORC1 SIGNALING;MYC TARGETS V1;MYOGENESIS	https://www.gsea-msigdb.org/gsea/msigdb/cards/HALLMARK_MTORC1_SIGNALING;https://www.gsea-msigdb.org/gsea/msigdb/cards/HALLMARK_MYC_TARGETS_V1;https://www.gsea-msigdb.org/gsea/msigdb/cards/HALLMARK_MYOGENESIS
O00461	Golgi integral membrane protein 4 OS=Homo sapiens OX=9606 GN=GOLIM4 PE=1 SV=1	GOLIM4	1.40378	None	81.879	9.8	5	5	5	28649	40217	0.832022	1.16798	extracellular	K23540				GO:0000139 Golgi membrane; GO:0005622 intracellular anatomical structure; GO:0005737 cytoplasm; GO:0005794 Golgi apparatus; GO:0005796 Golgi lumen; GO:0005801 cis-Golgi network; GO:0012505 endomembrane system; GO:0016020 membrane; GO:0016021 integral component of membrane; GO:0030133 transport vesicle; GO:0030139 endocytic vesicle; GO:0031090 organelle membrane; GO:0031224 intrinsic component of …										R-HSA-199991 Membrane Trafficking;R-HSA-5653656 Vesicle-mediated transport;R-HSA-6811438 Intra-Golgi traffic;R-HSA-6811442 Intra-Golgi and retrograde Golgi-to-ER traffic	https://reactome.org/PathwayBrowser/#/R-HSA-199991;https://reactome.org/PathwayBrowser/#/R-HSA-5653656;https://reactome.org/PathwayBrowser/#/R-HSA-6811438;https://reactome.org/PathwayBrowser/#/R-HSA-6811442
O00468	Agrin OS=Homo sapiens OX=9606 GN=AGRN PE=1 SV=6	AGRN	1.24089	None	217.32	7	8	8	8	42198	52363	0.892503	1.1075	extracellular	K06254	AGRN; agrin	hsa04512 ECM-receptor interaction	GO:0001523 retinoid metabolic process; GO:0001932 regulation of protein phosphorylation; GO:0001934 positive regulation of protein phosphorylation; GO:0001941 postsynaptic membrane organization; GO:0002028 regulation of sodium ion transport; GO:0006022 aminoglycan metabolic process; GO:0006023 aminoglycan biosynthetic process; GO:0006024 glycosaminoglycan biosynthetic process; GO:0006026 aminogly…	GO:0000323 lytic vacuole; GO:0005576 extracellular region; GO:0005604 basement membrane; GO:0005615 extracellular space; GO:0005622 intracellular anatomical structure; GO:0005737 cytoplasm; GO:0005764 lysosome; GO:0005773 vacuole; GO:0005775 vacuolar lumen; GO:0005794 Golgi apparatus; GO:0005796 Golgi lumen; GO:0005829 cytosol; GO:0005886 plasma membrane; GO:0009986 cell surface; GO:0012505 endom…	GO:0002162 dystroglycan binding; GO:0004857 enzyme inhibitor activity; GO:0005198 structural molecule activity; GO:0005200 structural constituent of cytoskeleton; GO:0005488 binding; GO:0005509 calcium ion binding; GO:0005515 protein binding; GO:0005539 glycosaminoglycan binding; GO:0008047 enzyme activator activity; GO:0008201 heparin binding; GO:0019207 kinase regulator activity; GO:0019209 kin…	PF03146; PF07648; PF00050; PF00053; PF00008; PF00054	PF03146 Agrin NtA domain; PF07648 Kazal-type serine protease inhibitor domain; PF00050 Kazal-type serine protease inhibitor domain; PF00053 Laminin EGF domain; PF00008 EGF-like domain; PF00054 Laminin G domain	O	KOG3509	Basement membrane-specific heparan sulfate proteoglycan (HSPG) core protein	WP2572 PRIMARY FOCAL SEGMENTAL GLOMERULOSCLEROSIS FSGS;WP4148 SPLICING FACTOR NOVA REGULATED SYNAPTIC PROTEINS	http://www.wikipathways.org/instance/WP2572_r119251;http://www.wikipathways.org/instance/WP4148_r110682		R-HSA-1266738 Developmental Biology;R-HSA-1430728 Metabolism;R-HSA-1474244 Extracellular matrix organization;R-HSA-1630316 Glycosaminoglycan metabolism;R-HSA-1638091 Heparan sulfate/heparin (HS-GAG) metabolism;R-HSA-1643685 Disease;R-HSA-1793185 Chondroitin sulfate/dermatan sulfate metabolism;R-HSA-196854 Metabolism of vitamins and cofactors;R-HSA-1971475 A tetrasaccharide linker sequence is requ…	https://reactome.org/PathwayBrowser/#/R-HSA-1266738;https://reactome.org/PathwayBrowser/#/R-HSA-1430728;https://reactome.org/PathwayBrowser/#/R-HSA-1474244;https://reactome.org/PathwayBrowser/#/R-HSA-1630316;https://reactome.org/PathwayBrowser/#/R-HSA-1638091;https://reactome.org/PathwayBrowser/#/R-HSA-1643685;https://reactome.org/PathwayBrowser/#/R-HSA-1793185;https://reactome.org/PathwayBrowser…	GLYCOLYSIS;MYOGENESIS	https://www.gsea-msigdb.org/gsea/msigdb/cards/HALLMARK_GLYCOLYSIS;https://www.gsea-msigdb.org/gsea/msigdb/cards/HALLMARK_MYOGENESIS
O00469	Procollagen-lysine,2-oxoglutarate 5-dioxygenase 2 OS=Homo sapiens OX=9606 GN=PLOD2 PE=1 SV=2	PLOD2	2.37599	Up	84.685	13.2	7	7	7	21987	52241	0.592418	1.40758	extracellular	K13645	PLOD2; procollagen-lysine,2-oxoglutarate 5-dioxygenase 2 [EC:1.14.11.4]	hsa00310 Lysine degradation; hsa01100 Metabolic pathways	GO:0000003 reproduction; GO:0001666 response to hypoxia; GO:0003006 developmental process involved in reproduction; GO:0006011 UDP-glucose metabolic process; GO:0006082 organic acid metabolic process; GO:0006139 nucleobase-containing compound metabolic process; GO:0006464 cellular protein modification process; GO:0006486 protein glycosylation; GO:0006493 protein O-linked glycosylation; GO:0006520…	GO:0005576 extracellular region; GO:0005615 extracellular space; GO:0005622 intracellular anatomical structure; GO:0005737 cytoplasm; GO:0005783 endoplasmic reticulum; GO:0005789 endoplasmic reticulum membrane; GO:0005791 rough endoplasmic reticulum; GO:0005794 Golgi apparatus; GO:0012505 endomembrane system; GO:0016020 membrane; GO:0030867 rough endoplasmic reticulum membrane; GO:0031090 organel…	GO:0003824 catalytic activity; GO:0003980 UDP-glucose:glycoprotein glucosyltransferase activity; GO:0005488 binding; GO:0005515 protein binding; GO:0008194 UDP-glycosyltransferase activity; GO:0008378 galactosyltransferase activity; GO:0008475 procollagen-lysine 5-dioxygenase activity; GO:0016491 oxidoreductase activity; GO:0016705 oxidoreductase activity, acting on paired donors, with incorporat…			O	KOG1971	Lysyl hydroxylase	WP4018 CLEAR CELL RENAL CELL CARCINOMA PATHWAYS;WP4786 TYPE I COLLAGEN SYNTHESIS IN THE CONTEXT OF OSTEOGENESIS IMPERFECTA	http://www.wikipathways.org/instance/WP4018_r117168;http://www.wikipathways.org/instance/WP4786_r117852		R-HSA-1474244 Extracellular matrix organization;R-HSA-1474290 Collagen formation;R-HSA-1650814 Collagen biosynthesis and modifying enzymes	https://reactome.org/PathwayBrowser/#/R-HSA-1474244;https://reactome.org/PathwayBrowser/#/R-HSA-1474290;https://reactome.org/PathwayBrowser/#/R-HSA-1650814	EPITHELIAL MESENCHYMAL TRANSITION;GLYCOLYSIS;MTORC1 SIGNALING	https://www.gsea-msigdb.org/gsea/msigdb/cards/HALLMARK_EPITHELIAL_MESENCHYMAL_TRANSITION;https://www.gsea-msigdb.org/gsea/msigdb/cards/HALLMARK_GLYCOLYSIS;https://www.gsea-msigdb.org/gsea/msigdb/cards/HALLMARK_MTORC1_SIGNALING
O00471	Exocyst complex component 5 OS=Homo sapiens OX=9606 GN=EXOC5 PE=1 SV=1	EXOC5	0.902421	None	81.852	16.1	9	9	9	139170	125590	1.05129	0.948708	cytoplasm	K19984	EXOC5; exocyst complex component 5	hsa05132 Salmonella infection	GO:0001505 regulation of neurotransmitter levels; GO:0001736 establishment of planar polarity; GO:0001738 morphogenesis of a polarized epithelium; GO:0001894 tissue homeostasis; GO:0002009 morphogenesis of an epithelium; GO:0006810 transport; GO:0006836 neurotransmitter transport; GO:0006887 exocytosis; GO:0006892 post-Golgi vesicle-mediated transport; GO:0006893 Golgi to plasma membrane transpor…	GO:0000145 exocyst; GO:0005622 intracellular anatomical structure; GO:0005737 cytoplasm; GO:0005829 cytosol; GO:0005938 cell cortex; GO:0032991 protein-containing complex; GO:0071944 cell periphery; GO:0099023 vesicle tethering complex; GO:0099568 cytoplasmic region;	GO:0005488 binding; GO:0005515 protein binding; GO:0008013 beta-catenin binding; GO:0019899 enzyme binding; GO:0031267 small GTPase binding; GO:0047485 protein N-terminus binding; GO:0051020 GTPase binding;			U	KOG3745	Exocyst subunit - Sec10p	WP4352 CILIARY LANDSCAPE	http://www.wikipathways.org/instance/WP4352_r102218		R-HSA-1445148 Translocation of SLC2A4 (GLUT4) to the plasma membrane;R-HSA-1852241 Organelle biogenesis and maintenance;R-HSA-199991 Membrane Trafficking;R-HSA-264876 Insulin processing;R-HSA-2980736 Peptide hormone metabolism;R-HSA-392499 Metabolism of proteins;R-HSA-5617833 Cilium Assembly;R-HSA-5620916 VxPx cargo-targeting to cilium;R-HSA-5620920 Cargo trafficking to the periciliary membrane;R…	https://reactome.org/PathwayBrowser/#/R-HSA-1445148;https://reactome.org/PathwayBrowser/#/R-HSA-1852241;https://reactome.org/PathwayBrowser/#/R-HSA-199991;https://reactome.org/PathwayBrowser/#/R-HSA-264876;https://reactome.org/PathwayBrowser/#/R-HSA-2980736;https://reactome.org/PathwayBrowser/#/R-HSA-392499;https://reactome.org/PathwayBrowser/#/R-HSA-5617833;https://reactome.org/PathwayBrowser/#/…
O00483	Cytochrome c oxidase subunit NDUFA4 OS=Homo sapiens OX=9606 GN=NDUFA4 PE=1 SV=1	NDUFA4	1.30261	None	9.3697	46.9	4	4	4	983560	1281200	0.868578	1.13142	mitochondria	K03948	NDUFA4; NADH dehydrogenase (ubiquinone) 1 alpha subcomplex subunit 4	hsa04932 Non-alcoholic fatty liver disease; hsa05208 Chemical carcinogenesis - reactive oxygen species; hsa05016 Huntington disease; hsa00190 Oxidative phosphorylation; hsa05415 Diabetic cardiomyopathy; hsa05012 Parkinson disease; hsa05010 Alzheimer disease; hsa04723 Retrograde endocannabinoid signaling; hsa04714 Thermogenesis; hsa05022 Pathways of neurodegeneration - multiple diseases; hsa05014 …	GO:0006091 generation of precursor metabolites and energy; GO:0006119 oxidative phosphorylation; GO:0006120 mitochondrial electron transport, NADH to ubiquinone; GO:0006139 nucleobase-containing compound metabolic process; GO:0006163 purine nucleotide metabolic process; GO:0006725 cellular aromatic compound metabolic process; GO:0006753 nucleoside phosphate metabolic process; GO:0006793 phosphoru…	GO:0005622 intracellular anatomical structure; GO:0005737 cytoplasm; GO:0005739 mitochondrion; GO:0005740 mitochondrial envelope; GO:0005743 mitochondrial inner membrane; GO:0005746 mitochondrial respirasome; GO:0005747 mitochondrial respiratory chain complex I; GO:0005751 mitochondrial respiratory chain complex IV; GO:0016020 membrane; GO:0019866 organelle inner membrane; GO:0030964 NADH dehydro…	GO:0003824 catalytic activity; GO:0003954 NADH dehydrogenase activity; GO:0005488 binding; GO:0008137 NADH dehydrogenase (ubiquinone) activity; GO:0016491 oxidoreductase activity; GO:0016651 oxidoreductase activity, acting on NAD(P)H; GO:0016655 oxidoreductase activity, acting on NAD(P)H, quinone or similar compound as acceptor; GO:0044877 protein-containing complex binding; GO:0050136 NADH dehyd…						WP111 ELECTRON TRANSPORT CHAIN OXPHOS SYSTEM IN MITOCHONDRIA;WP4922 MITOCHONDRIAL COMPLEX IV ASSEMBLY;WP4396 NONALCOHOLIC FATTY LIVER DISEASE;WP623 OXIDATIVE PHOSPHORYLATION	http://www.wikipathways.org/instance/WP111_r117097;http://www.wikipathways.org/instance/WP4922_r117792;http://www.wikipathways.org/instance/WP4396_r98945;http://www.wikipathways.org/instance/WP623_r107189		R-HSA-1428517 The citric acid (TCA) cycle and respiratory electron transport;R-HSA-1430728 Metabolism;R-HSA-163200 Respiratory electron transport, ATP synthesis by chemiosmotic coupling, and heat production by uncoupling proteins.;R-HSA-212436 Generic Transcription Pathway;R-HSA-2262752 Cellular responses to stress;R-HSA-3700989 Transcriptional Regulation by TP53;R-HSA-5628897 TP53 Regulates Meta…	https://reactome.org/PathwayBrowser/#/R-HSA-1428517;https://reactome.org/PathwayBrowser/#/R-HSA-1430728;https://reactome.org/PathwayBrowser/#/R-HSA-163200;https://reactome.org/PathwayBrowser/#/R-HSA-212436;https://reactome.org/PathwayBrowser/#/R-HSA-2262752;https://reactome.org/PathwayBrowser/#/R-HSA-3700989;https://reactome.org/PathwayBrowser/#/R-HSA-5628897;https://reactome.org/PathwayBrowser/#…	OXIDATIVE PHOSPHORYLATION	https://www.gsea-msigdb.org/gsea/msigdb/cards/HALLMARK_OXIDATIVE_PHOSPHORYLATION
O00487	26S proteasome non-ATPase regulatory subunit 14 OS=Homo sapiens OX=9606 GN=PSMD14 PE=1 SV=1	PSMD14	1.06088	None	34.577	53.9	13	13	13	1261400	1338200	0.970457	1.02954	cytoplasm	K03030	PSMD14; 26S proteasome regulatory subunit N11	hsa05017 Spinocerebellar ataxia; hsa05016 Huntington disease; hsa03050 Proteasome; hsa05169 Epstein-Barr virus infection; hsa05012 Parkinson disease; hsa05010 Alzheimer disease; hsa05022 Pathways of neurodegeneration - multiple diseases; hsa05014 Amyotrophic lateral sclerosis; hsa05020 Prion disease	GO:0000724 double-strand break repair via homologous recombination; GO:0000725 recombinational repair; GO:0001775 cell activation; GO:0002252 immune effector process; GO:0002263 cell activation involved in immune response; GO:0002274 myeloid leukocyte activation; GO:0002275 myeloid cell activation involved in immune response; GO:0002283 neutrophil activation involved in immune response; GO:000236…	GO:0000502 proteasome complex; GO:0005576 extracellular region; GO:0005622 intracellular anatomical structure; GO:0005634 nucleus; GO:0005654 nucleoplasm; GO:0005737 cytoplasm; GO:0005829 cytosol; GO:0005838 proteasome regulatory particle; GO:0008541 proteasome regulatory particle, lid subcomplex; GO:0012505 endomembrane system; GO:0022624 proteasome accessory complex; GO:0030141 secretory granul…	GO:0003824 catalytic activity; GO:0004175 endopeptidase activity; GO:0004843 thiol-dependent deubiquitinase; GO:0005488 binding; GO:0005515 protein binding; GO:0008047 enzyme activator activity; GO:0008233 peptidase activity; GO:0008234 cysteine-type peptidase activity; GO:0008237 metallopeptidase activity; GO:0016504 peptidase activator activity; GO:0016787 hydrolase activity; GO:0019783 ubiquit…			O	KOG1555	26S proteasome regulatory complex, subunit RPN11	WP5124 ALZHEIMERS DISEASE;WP2059 ALZHEIMERS DISEASE AND MIRNA EFFECTS;WP2359 PARKINUBIQUITIN PROTEASOMAL SYSTEM PATHWAY	http://www.wikipathways.org/instance/WP5124_r119432;http://www.wikipathways.org/instance/WP2059_r119468;http://www.wikipathways.org/instance/WP2359_r119918		R-HSA-109581 Apoptosis;R-HSA-1168372 Downstream signaling events of B Cell Receptor (BCR);R-HSA-1169091 Activation of NF-kappaB in B cells;R-HSA-1234174 Cellular response to hypoxia;R-HSA-1234176 Oxygen-dependent proline hydroxylation of Hypoxia-inducible Factor Alpha;R-HSA-1236974 ER-Phagosome pathway;R-HSA-1236975 Antigen processing-Cross presentation;R-HSA-1236978 Cross-presentation of soluble…		MTORC1 SIGNALING;MYC TARGETS V1	https://www.gsea-msigdb.org/gsea/msigdb/cards/HALLMARK_MTORC1_SIGNALING;https://www.gsea-msigdb.org/gsea/msigdb/cards/HALLMARK_MYC_TARGETS_V1
O00488	Zinc finger protein 593 OS=Homo sapiens OX=9606 GN=ZNF593 PE=1 SV=2	ZNF593	0.979061	None	15.199	39.6	4	4	4	138020	135130	1.01058	0.98942	nucleus	K14821			GO:0000054 ribosomal subunit export from nucleus; GO:0000055 ribosomal large subunit export from nucleus; GO:0006355 regulation of transcription, DNA-templated; GO:0006357 regulation of transcription by RNA polymerase II; GO:0006403 RNA localization; GO:0006405 RNA export from nucleus; GO:0006611 protein export from nucleus; GO:0006810 transport; GO:0006886 intracellular protein transport; GO:000…	GO:0005622 intracellular anatomical structure; GO:0005634 nucleus; GO:0005730 nucleolus; GO:0030684 preribosome; GO:0030687 preribosome, large subunit precursor; GO:0031974 membrane-enclosed lumen; GO:0031981 nuclear lumen; GO:0032991 protein-containing complex; GO:0043226 organelle; GO:0043227 membrane-bounded organelle; GO:0043228 non-membrane-bounded organelle; GO:0043229 intracellular organel…	GO:0000981 DNA-binding transcription factor activity, RNA polymerase II-specific; GO:0003700 DNA-binding transcription factor activity; GO:0005488 binding; GO:0008270 zinc ion binding; GO:0043021 ribonucleoprotein complex binding; GO:0043023 ribosomal large subunit binding; GO:0043167 ion binding; GO:0043169 cation binding; GO:0044877 protein-containing complex binding; GO:0046872 metal ion bindi…			A	KOG3408	U1-like Zn-finger-containing protein, probabl erole in RNA processing/splicing
O00505	Importin subunit alpha-4 OS=Homo sapiens OX=9606 GN=KPNA3 PE=1 SV=2	KPNA3	0.964335	None	57.81	43	13	10	13	634240	611620	1.01816	0.981844	cytoplasm	K23583	KPNA3_4; importin subunit alpha-4/3	hsa05132 Salmonella infection; hsa03013 Nucleocytoplasmic transport; hsa05207 Chemical carcinogenesis - receptor activation	GO:0000003 reproduction; GO:0000280 nuclear division; GO:0002119 nematode larval development; GO:0002164 larval development; GO:0003006 developmental process involved in reproduction; GO:0006606 protein import into nucleus; GO:0006607 NLS-bearing protein import into nucleus; GO:0006810 transport; GO:0006886 intracellular protein transport; GO:0006913 nucleocytoplasmic transport; GO:0006996 organe…	GO:0005622 intracellular anatomical structure; GO:0005634 nucleus; GO:0005635 nuclear envelope; GO:0005643 nuclear pore; GO:0005654 nucleoplasm; GO:0005737 cytoplasm; GO:0005829 cytosol; GO:0012505 endomembrane system; GO:0031967 organelle envelope; GO:0031974 membrane-enclosed lumen; GO:0031975 envelope; GO:0031981 nuclear lumen; GO:0032991 protein-containing complex; GO:0043226 organelle; GO:00…	GO:0005048 signal sequence binding; GO:0005102 signaling receptor binding; GO:0005112 Notch binding; GO:0005215 transporter activity; GO:0005488 binding; GO:0005515 protein binding; GO:0008022 protein C-terminus binding; GO:0008092 cytoskeletal protein binding; GO:0008139 nuclear localization sequence binding; GO:0017022 myosin binding; GO:0033218 amide binding; GO:0042277 peptide binding;			U	KOG0166	Karyopherin (importin) alpha				R-HSA-1169408 ISG15 antiviral mechanism;R-HSA-1169410 Antiviral mechanism by IFN-stimulated genes;R-HSA-1280215 Cytokine Signaling in Immune system;R-HSA-1643685 Disease;R-HSA-168255 Influenza Infection;R-HSA-168256 Immune System;R-HSA-168276 NS1 Mediated Effects on Host Pathways;R-HSA-5663205 Infectious disease;R-HSA-913531 Interferon Signaling	https://reactome.org/PathwayBrowser/#/R-HSA-1169408;https://reactome.org/PathwayBrowser/#/R-HSA-1169410;https://reactome.org/PathwayBrowser/#/R-HSA-1280215;https://reactome.org/PathwayBrowser/#/R-HSA-1643685;https://reactome.org/PathwayBrowser/#/R-HSA-168255;https://reactome.org/PathwayBrowser/#/R-HSA-168256;https://reactome.org/PathwayBrowser/#/R-HSA-168276;https://reactome.org/PathwayBrowser/#/…
O00515	Ladinin-1 OS=Homo sapiens OX=9606 GN=LAD1 PE=1 SV=2	LAD1	0.651173	Down	57.13	11.8	4	4	4	51140	33301	1.21126	0.78874	nucleus					GO:0005622 intracellular anatomical structure; GO:0005856 cytoskeleton; GO:0015629 actin cytoskeleton; GO:0043226 organelle; GO:0043228 non-membrane-bounded organelle; GO:0043229 intracellular organelle; GO:0043232 intracellular non-membrane-bounded organelle;	GO:0005198 structural molecule activity;											ESTROGEN RESPONSE EARLY	https://www.gsea-msigdb.org/gsea/msigdb/cards/HALLMARK_ESTROGEN_RESPONSE_EARLY
O00541	Pescadillo homolog OS=Homo sapiens OX=9606 GN=PES1 PE=1 SV=1	PES1	1.06541	None	68.002	35.7	18	18	18	441960	470870	0.968329	1.03167	cytoplasm,nucleus	K14843			GO:0000460 maturation of 5.8S rRNA; GO:0000463 maturation of LSU-rRNA from tricistronic rRNA transcript (SSU-rRNA, 5.8S rRNA, LSU-rRNA); GO:0000466 maturation of 5.8S rRNA from tricistronic rRNA transcript (SSU-rRNA, 5.8S rRNA, LSU-rRNA); GO:0000470 maturation of LSU-rRNA; GO:0006139 nucleobase-containing compound metabolic process; GO:0006364 rRNA processing; GO:0006396 RNA processing; GO:000672…	GO:0000793 condensed chromosome; GO:0005622 intracellular anatomical structure; GO:0005634 nucleus; GO:0005654 nucleoplasm; GO:0005694 chromosome; GO:0005730 nucleolus; GO:0005737 cytoplasm; GO:0005829 cytosol; GO:0030684 preribosome; GO:0030686 90S preribosome; GO:0030687 preribosome, large subunit precursor; GO:0031974 membrane-enclosed lumen; GO:0031981 nuclear lumen; GO:0032991 protein-contai…	GO:0003676 nucleic acid binding; GO:0003723 RNA binding; GO:0005488 binding; GO:0097159 organic cyclic compound binding; GO:1901363 heterocyclic compound binding;			A	KOG2481	Protein required for normal rRNA processing				R-HSA-6791226 Major pathway of rRNA processing in the nucleolus and cytosol;R-HSA-72312 rRNA processing;R-HSA-8868773 rRNA processing in the nucleus and cytosol;R-HSA-8953854 Metabolism of RNA	https://reactome.org/PathwayBrowser/#/R-HSA-6791226;https://reactome.org/PathwayBrowser/#/R-HSA-72312;https://reactome.org/PathwayBrowser/#/R-HSA-8868773;https://reactome.org/PathwayBrowser/#/R-HSA-8953854	MYC TARGETS V2	https://www.gsea-msigdb.org/gsea/msigdb/cards/HALLMARK_MYC_TARGETS_V2
O00559	Receptor-binding cancer antigen expressed on SiSo cells OS=Homo sapiens OX=9606 GN=EBAG9 PE=1 SV=1	EBAG9		None	24.377	8.9	1	1	1	0	0			mitochondria	K22455	EBAG9; estrogen receptor-binding fragment-associated gene 9 protein	hsa04915 Estrogen signaling pathway	GO:0001558 regulation of cell growth; GO:0006915 apoptotic process; GO:0008219 cell death; GO:0009893 positive regulation of metabolic process; GO:0009987 cellular process; GO:0010604 positive regulation of macromolecule metabolic process; GO:0010952 positive regulation of peptidase activity; GO:0012501 programmed cell death; GO:0019222 regulation of metabolic process; GO:0030162 regulation of pr…	GO:0000139 Golgi membrane; GO:0005622 intracellular anatomical structure; GO:0005737 cytoplasm; GO:0005794 Golgi apparatus; GO:0012505 endomembrane system; GO:0016020 membrane; GO:0030141 secretory granule; GO:0031090 organelle membrane; GO:0031410 cytoplasmic vesicle; GO:0031982 vesicle; GO:0031984 organelle subcompartment; GO:0043226 organelle; GO:0043227 membrane-bounded organelle; GO:0043229 …	GO:0008047 enzyme activator activity; GO:0016504 peptidase activator activity; GO:0016505 peptidase activator activity involved in apoptotic process; GO:0030234 enzyme regulator activity; GO:0061134 peptidase regulator activity; GO:0098772 molecular function regulator;									R-HSA-162582 Signal Transduction;R-HSA-8939211 ESR-mediated signaling;R-HSA-9006931 Signaling by Nuclear Receptors;R-HSA-9018519 Estrogen-dependent gene expression	https://reactome.org/PathwayBrowser/#/R-HSA-162582;https://reactome.org/PathwayBrowser/#/R-HSA-8939211;https://reactome.org/PathwayBrowser/#/R-HSA-9006931;https://reactome.org/PathwayBrowser/#/R-HSA-9018519
O00560	Syntenin-1 OS=Homo sapiens OX=9606 GN=SDCBP PE=1 SV=1	SDCBP		None	32.444	12.4	2	2	2	0	0			cytoskeleton	K17254			GO:0001558 regulation of cell growth; GO:0001775 cell activation; GO:0001932 regulation of protein phosphorylation; GO:0001934 positive regulation of protein phosphorylation; GO:0002090 regulation of receptor internalization; GO:0002091 negative regulation of receptor internalization; GO:0002252 immune effector process; GO:0002263 cell activation involved in immune response; GO:0002274 myeloid le…	GO:0000323 lytic vacuole; GO:0005576 extracellular region; GO:0005615 extracellular space; GO:0005622 intracellular anatomical structure; GO:0005634 nucleus; GO:0005635 nuclear envelope; GO:0005654 nucleoplasm; GO:0005737 cytoplasm; GO:0005764 lysosome; GO:0005766 primary lysosome; GO:0005773 vacuole; GO:0005775 vacuolar lumen; GO:0005829 cytosol; GO:0005856 cytoskeleton; GO:0005886 plasma membra…	GO:0001664 G protein-coupled receptor binding; GO:0005102 signaling receptor binding; GO:0005109 frizzled binding; GO:0005126 cytokine receptor binding; GO:0005137 interleukin-5 receptor binding; GO:0005488 binding; GO:0005515 protein binding; GO:0005543 phospholipid binding; GO:0005546 phosphatidylinositol-4,5-bisphosphate binding; GO:0008022 protein C-terminus binding; GO:0008092 cytoskeletal p…	PF00595	PF00595 PDZ domain	K	KOG0849	Transcription factor PRD and related proteins, contain PAX and HOX domains	WP2858 ECTODERM DIFFERENTIATION;WP3888 VEGFAVEGFR2 SIGNALING PATHWAY	http://www.wikipathways.org/instance/WP2858_r116763;http://www.wikipathways.org/instance/WP3888_r116782		R-HSA-1266738 Developmental Biology;R-HSA-168249 Innate Immune System;R-HSA-168256 Immune System;R-HSA-2682334 EPH-Ephrin signaling;R-HSA-373760 L1CAM interactions;R-HSA-3928664 Ephrin signaling;R-HSA-422475 Axon guidance;R-HSA-447043 Neurofascin interactions;R-HSA-5213460 RIPK1-mediated regulated necrosis;R-HSA-5218859 Regulated Necrosis;R-HSA-5357801 Programmed Cell Death;R-HSA-5675482 Regulati…	https://reactome.org/PathwayBrowser/#/R-HSA-1266738;https://reactome.org/PathwayBrowser/#/R-HSA-168249;https://reactome.org/PathwayBrowser/#/R-HSA-168256;https://reactome.org/PathwayBrowser/#/R-HSA-2682334;https://reactome.org/PathwayBrowser/#/R-HSA-373760;https://reactome.org/PathwayBrowser/#/R-HSA-3928664;https://reactome.org/PathwayBrowser/#/R-HSA-422475;https://reactome.org/PathwayBrowser/#/R…	DNA REPAIR;HEME METABOLISM	https://www.gsea-msigdb.org/gsea/msigdb/cards/HALLMARK_DNA_REPAIR;https://www.gsea-msigdb.org/gsea/msigdb/cards/HALLMARK_HEME_METABOLISM
O00566	U3 small nucleolar ribonucleoprotein protein MPP10 OS=Homo sapiens OX=9606 GN=MPHOSPH10 PE=1 SV=2	MPHOSPH10	0.975088	None	78.863	22.8	9	9	9	337190	328790	1.01261	0.987387	nucleus	K14559	MPP10; U3 small nucleolar RNA-associated protein MPP10	hsa03008 Ribosome biogenesis in eukaryotes	GO:0000375 RNA splicing, via transesterification reactions; GO:0006139 nucleobase-containing compound metabolic process; GO:0006364 rRNA processing; GO:0006396 RNA processing; GO:0006725 cellular aromatic compound metabolic process; GO:0006807 nitrogen compound metabolic process; GO:0008152 metabolic process; GO:0008380 RNA splicing; GO:0009892 negative regulation of metabolic process; GO:0009987…	GO:0005622 intracellular anatomical structure; GO:0005634 nucleus; GO:0005654 nucleoplasm; GO:0005730 nucleolus; GO:0005732 sno(s)RNA-containing ribonucleoprotein complex; GO:0030684 preribosome; GO:0030686 90S preribosome; GO:0031974 membrane-enclosed lumen; GO:0031981 nuclear lumen; GO:0032040 small-subunit processome; GO:0032991 protein-containing complex; GO:0034457 Mpp10 complex; GO:0043226 …				A	KOG2600	U3 small nucleolar ribonucleoprotein (snoRNP) subunit - Mpp10p				R-HSA-6790901 rRNA modification in the nucleus and cytosol;R-HSA-6791226 Major pathway of rRNA processing in the nucleolus and cytosol;R-HSA-72312 rRNA processing;R-HSA-8868773 rRNA processing in the nucleus and cytosol;R-HSA-8953854 Metabolism of RNA	https://reactome.org/PathwayBrowser/#/R-HSA-6790901;https://reactome.org/PathwayBrowser/#/R-HSA-6791226;https://reactome.org/PathwayBrowser/#/R-HSA-72312;https://reactome.org/PathwayBrowser/#/R-HSA-8868773;https://reactome.org/PathwayBrowser/#/R-HSA-8953854	MYC TARGETS V2	https://www.gsea-msigdb.org/gsea/msigdb/cards/HALLMARK_MYC_TARGETS_V2
O00567	Nucleolar protein 56 OS=Homo sapiens OX=9606 GN=NOP56 PE=1 SV=4	NOP56	0.926234	None	66.049	68.4	28	28	28	1249900	1157700	1.0383	0.961705	nucleus	K14564	NOP56; nucleolar protein 56	hsa05017 Spinocerebellar ataxia; hsa03008 Ribosome biogenesis in eukaryotes	GO:0000154 rRNA modification; GO:0006139 nucleobase-containing compound metabolic process; GO:0006364 rRNA processing; GO:0006396 RNA processing; GO:0006725 cellular aromatic compound metabolic process; GO:0006807 nitrogen compound metabolic process; GO:0008152 metabolic process; GO:0009451 RNA modification; GO:0009987 cellular process; GO:0010467 gene expression; GO:0016070 RNA metabolic process…	GO:0001650 fibrillar center; GO:0005622 intracellular anatomical structure; GO:0005634 nucleus; GO:0005654 nucleoplasm; GO:0005730 nucleolus; GO:0005732 sno(s)RNA-containing ribonucleoprotein complex; GO:0030684 preribosome; GO:0031428 box C/D RNP complex; GO:0031974 membrane-enclosed lumen; GO:0031981 nuclear lumen; GO:0032040 small-subunit processome; GO:0032991 protein-containing complex; GO:0…	GO:0003676 nucleic acid binding; GO:0003723 RNA binding; GO:0005488 binding; GO:0005515 protein binding; GO:0019899 enzyme binding; GO:0030515 snoRNA binding; GO:0097159 organic cyclic compound binding; GO:1901363 heterocyclic compound binding; GO:1990226 histone methyltransferase binding;	PF08156	PF08156 NOP5NT (NUC127) domain	AJ	KOG2573	Ribosome biogenesis protein - Nop56p/Sik1p				R-HSA-390466 Chaperonin-mediated protein folding;R-HSA-390471 Association of TriC/CCT with target proteins during biosynthesis;R-HSA-391251 Protein folding;R-HSA-392499 Metabolism of proteins;R-HSA-6790901 rRNA modification in the nucleus and cytosol;R-HSA-6791226 Major pathway of rRNA processing in the nucleolus and cytosol;R-HSA-72312 rRNA processing;R-HSA-8868773 rRNA processing in the nucleus…	https://reactome.org/PathwayBrowser/#/R-HSA-390466;https://reactome.org/PathwayBrowser/#/R-HSA-390471;https://reactome.org/PathwayBrowser/#/R-HSA-391251;https://reactome.org/PathwayBrowser/#/R-HSA-392499;https://reactome.org/PathwayBrowser/#/R-HSA-6790901;https://reactome.org/PathwayBrowser/#/R-HSA-6791226;https://reactome.org/PathwayBrowser/#/R-HSA-72312;https://reactome.org/PathwayBrowser/#/R-H…	E2F TARGETS;MYC TARGETS V1;MYC TARGETS V2;UNFOLDED PROTEIN RESPONSE	https://www.gsea-msigdb.org/gsea/msigdb/cards/HALLMARK_E2F_TARGETS;https://www.gsea-msigdb.org/gsea/msigdb/cards/HALLMARK_MYC_TARGETS_V1;https://www.gsea-msigdb.org/gsea/msigdb/cards/HALLMARK_MYC_TARGETS_V2;https://www.gsea-msigdb.org/gsea/msigdb/cards/HALLMARK_UNFOLDED_PROTEIN_RESPONSE
O00571	ATP-dependent RNA helicase DDX3X OS=Homo sapiens OX=9606 GN=DDX3X PE=1 SV=3	DDX3X	1.03536	None	73.243	52.1	27	9	26	1982700	2052800	0.982629	1.01737	nucleus	K11594	DDX3X; ATP-dependent RNA helicase DDX3X [EC:3.6.4.13]	hsa04622 RIG-I-like receptor signaling pathway; hsa05161 Hepatitis B; hsa05203 Viral carcinogenesis	GO:0000003 reproduction; GO:0000070 mitotic sister chromatid segregation; GO:0000278 mitotic cell cycle; GO:0000280 nuclear division; GO:0000819 sister chromatid segregation; GO:0001558 regulation of cell growth; GO:0001775 cell activation; GO:0001817 regulation of cytokine production; GO:0001819 positive regulation of cytokine production; GO:0001932 regulation of protein phosphorylation; GO:0001…	GO:0005576 extracellular region; GO:0005622 intracellular anatomical structure; GO:0005634 nucleus; GO:0005654 nucleoplasm; GO:0005730 nucleolus; GO:0005737 cytoplasm; GO:0005739 mitochondrion; GO:0005740 mitochondrial envelope; GO:0005741 mitochondrial outer membrane; GO:0005829 cytosol; GO:0010494 cytoplasmic stress granule; GO:0012505 endomembrane system; GO:0016020 membrane; GO:0016442 RISC c…	GO:0003676 nucleic acid binding; GO:0003677 DNA binding; GO:0003678 DNA helicase activity; GO:0003723 RNA binding; GO:0003724 RNA helicase activity; GO:0003725 double-stranded RNA binding; GO:0003727 single-stranded RNA binding; GO:0003729 mRNA binding; GO:0003824 catalytic activity; GO:0003924 GTPase activity; GO:0004386 helicase activity; GO:0005488 binding; GO:0005515 protein binding; GO:00080…	PF00270; PF00271	PF00270 DEAD/DEAH box helicase; PF00271 Helicase conserved C-terminal domain	A	KOG0335	ATP-dependent RNA helicase	WP4666 HEPATITIS B INFECTION;WP3865 NOVEL INTRACELLULAR COMPONENTS OF RIGILIKE RECEPTOR RLR PATHWAY	http://www.wikipathways.org/instance/WP4666_r119241;http://www.wikipathways.org/instance/WP3865_r106524		R-HSA-168249 Innate Immune System;R-HSA-168256 Immune System;R-HSA-6798695 Neutrophil degranulation	https://reactome.org/PathwayBrowser/#/R-HSA-168249;https://reactome.org/PathwayBrowser/#/R-HSA-168256;https://reactome.org/PathwayBrowser/#/R-HSA-6798695
O00623	Peroxisome assembly protein 12 OS=Homo sapiens OX=9606 GN=PEX12 PE=1 SV=1	PEX12		None	40.797	4.2	1	1	1	0	0			cytoplasm,nucleus	K13345	PEX12; peroxin-12	hsa04146 Peroxisome	GO:0000003 reproduction; GO:0002119 nematode larval development; GO:0002164 larval development; GO:0003006 developmental process involved in reproduction; GO:0006464 cellular protein modification process; GO:0006513 protein monoubiquitination; GO:0006605 protein targeting; GO:0006625 protein targeting to peroxisome; GO:0006807 nitrogen compound metabolic process; GO:0006810 transport; GO:0006886 …	GO:0005622 intracellular anatomical structure; GO:0005737 cytoplasm; GO:0005777 peroxisome; GO:0005778 peroxisomal membrane; GO:0005779 integral component of peroxisomal membrane; GO:0016020 membrane; GO:0016021 integral component of membrane; GO:0031090 organelle membrane; GO:0031224 intrinsic component of membrane; GO:0031231 intrinsic component of peroxisomal membrane; GO:0031300 intrinsic com…	GO:0003824 catalytic activity; GO:0004842 ubiquitin-protein transferase activity; GO:0005488 binding; GO:0005515 protein binding; GO:0008022 protein C-terminus binding; GO:0008270 zinc ion binding; GO:0016740 transferase activity; GO:0019787 ubiquitin-like protein transferase activity; GO:0043167 ion binding; GO:0043169 cation binding; GO:0046872 metal ion binding; GO:0046914 transition metal ion…			O	KOG0826	Predicted E3 ubiquitin ligase involved in peroxisome organization				R-HSA-392499 Metabolism of proteins;R-HSA-597592 Post-translational protein modification;R-HSA-8852135 Protein ubiquitination;R-HSA-8866654 E3 ubiquitin ligases ubiquitinate target proteins;R-HSA-9033241 Peroxisomal protein import;R-HSA-9603798 Class I peroxisomal membrane protein import;R-HSA-9609507 Protein localization	https://reactome.org/PathwayBrowser/#/R-HSA-392499;https://reactome.org/PathwayBrowser/#/R-HSA-597592;https://reactome.org/PathwayBrowser/#/R-HSA-8852135;https://reactome.org/PathwayBrowser/#/R-HSA-8866654;https://reactome.org/PathwayBrowser/#/R-HSA-9033241;https://reactome.org/PathwayBrowser/#/R-HSA-9603798;https://reactome.org/PathwayBrowser/#/R-HSA-9609507	BILE ACID METABOLISM	https://www.gsea-msigdb.org/gsea/msigdb/cards/HALLMARK_BILE_ACID_METABOLISM
O00625	Pirin OS=Homo sapiens OX=9606 GN=PIR PE=1 SV=1	PIR	1.2288	None	32.113	40	8	8	8	208480	256180	0.897344	1.10266	cytoplasm	K06911			GO:0002376 immune system process; GO:0002520 immune system development; GO:0002521 leukocyte differentiation; GO:0002573 myeloid leukocyte differentiation; GO:0006139 nucleobase-containing compound metabolic process; GO:0006351 transcription, DNA-templated; GO:0006366 transcription by RNA polymerase II; GO:0006725 cellular aromatic compound metabolic process; GO:0006807 nitrogen compound metaboli…	GO:0005622 intracellular anatomical structure; GO:0005634 nucleus; GO:0005654 nucleoplasm; GO:0005737 cytoplasm; GO:0005829 cytosol; GO:0031974 membrane-enclosed lumen; GO:0031981 nuclear lumen; GO:0043226 organelle; GO:0043227 membrane-bounded organelle; GO:0043229 intracellular organelle; GO:0043231 intracellular membrane-bounded organelle; GO:0043233 organelle lumen; GO:0070013 intracellular o…	GO:0003712 transcription coregulator activity; GO:0003824 catalytic activity; GO:0005488 binding; GO:0008127 quercetin 2,3-dioxygenase activity; GO:0016491 oxidoreductase activity; GO:0016701 oxidoreductase activity, acting on single donors with incorporation of molecular oxygen; GO:0016702 oxidoreductase activity, acting on single donors with incorporation of molecular oxygen, incorporation of t…	PF05726	PF05726 Pirin C-terminal cupin domain						Transcription factor	R-HSA-8935690 Digestion;R-HSA-8963743 Digestion and absorption	https://reactome.org/PathwayBrowser/#/R-HSA-8935690;https://reactome.org/PathwayBrowser/#/R-HSA-8963743
O00628	Peroxisomal targeting signal 2 receptor OS=Homo sapiens OX=9606 GN=PEX7 PE=1 SV=1	PEX7		None	35.891	5.3	1	1	1	0	0			cytoplasm,nucleus	K13341	PEX7; peroxin-7	hsa04146 Peroxisome	GO:0001501 skeletal system development; GO:0001503 ossification; GO:0001764 neuron migration; GO:0001958 endochondral ossification; GO:0006082 organic acid metabolic process; GO:0006605 protein targeting; GO:0006625 protein targeting to peroxisome; GO:0006629 lipid metabolic process; GO:0006631 fatty acid metabolic process; GO:0006635 fatty acid beta-oxidation; GO:0006662 glycerol ether metabolic…	GO:0005622 intracellular anatomical structure; GO:0005737 cytoplasm; GO:0005777 peroxisome; GO:0005778 peroxisomal membrane; GO:0005782 peroxisomal matrix; GO:0005829 cytosol; GO:0016020 membrane; GO:0031090 organelle membrane; GO:0031903 microbody membrane; GO:0031907 microbody lumen; GO:0031974 membrane-enclosed lumen; GO:0042579 microbody; GO:0043226 organelle; GO:0043227 membrane-bounded orga…	GO:0000268 peroxisome targeting sequence binding; GO:0005048 signal sequence binding; GO:0005053 peroxisome matrix targeting signal-2 binding; GO:0005488 binding; GO:0005515 protein binding; GO:0019899 enzyme binding; GO:0033218 amide binding; GO:0042277 peptide binding; GO:0042802 identical protein binding; GO:0042803 protein homodimerization activity; GO:0046983 protein dimerization activity;			U	KOG0277	Peroxisomal targeting signal type 2 receptor				R-HSA-9033241 Peroxisomal protein import;R-HSA-9609507 Protein localization	https://reactome.org/PathwayBrowser/#/R-HSA-9033241;https://reactome.org/PathwayBrowser/#/R-HSA-9609507	BILE ACID METABOLISM	https://www.gsea-msigdb.org/gsea/msigdb/cards/HALLMARK_BILE_ACID_METABOLISM
O00629	Importin subunit alpha-3 OS=Homo sapiens OX=9606 GN=KPNA4 PE=1 SV=1	KPNA4	0.94704	None	57.886	45.1	12	9	9	285310	270200	1.0272	0.9728	cytoplasm	K23583	KPNA3_4; importin subunit alpha-4/3	hsa05132 Salmonella infection; hsa03013 Nucleocytoplasmic transport; hsa05207 Chemical carcinogenesis - receptor activation	GO:0000003 reproduction; GO:0000280 nuclear division; GO:0000302 response to reactive oxygen species; GO:0002119 nematode larval development; GO:0002164 larval development; GO:0003006 developmental process involved in reproduction; GO:0006606 protein import into nucleus; GO:0006607 NLS-bearing protein import into nucleus; GO:0006810 transport; GO:0006886 intracellular protein transport; GO:000691…	GO:0005622 intracellular anatomical structure; GO:0005634 nucleus; GO:0005635 nuclear envelope; GO:0005643 nuclear pore; GO:0005654 nucleoplasm; GO:0005737 cytoplasm; GO:0005829 cytosol; GO:0012505 endomembrane system; GO:0016020 membrane; GO:0031090 organelle membrane; GO:0031965 nuclear membrane; GO:0031967 organelle envelope; GO:0031974 membrane-enclosed lumen; GO:0031975 envelope; GO:0031981 …	GO:0005048 signal sequence binding; GO:0005102 signaling receptor binding; GO:0005112 Notch binding; GO:0005215 transporter activity; GO:0005488 binding; GO:0005515 protein binding; GO:0008092 cytoskeletal protein binding; GO:0008139 nuclear localization sequence binding; GO:0017022 myosin binding; GO:0033218 amide binding; GO:0042277 peptide binding;			U	KOG0166	Karyopherin (importin) alpha	WP2034 LEPTIN SIGNALING PATHWAY	http://www.wikipathways.org/instance/WP2034_r120670		R-HSA-1169408 ISG15 antiviral mechanism;R-HSA-1169410 Antiviral mechanism by IFN-stimulated genes;R-HSA-1280215 Cytokine Signaling in Immune system;R-HSA-1643685 Disease;R-HSA-168255 Influenza Infection;R-HSA-168256 Immune System;R-HSA-168276 NS1 Mediated Effects on Host Pathways;R-HSA-5663205 Infectious disease;R-HSA-913531 Interferon Signaling	https://reactome.org/PathwayBrowser/#/R-HSA-1169408;https://reactome.org/PathwayBrowser/#/R-HSA-1169410;https://reactome.org/PathwayBrowser/#/R-HSA-1280215;https://reactome.org/PathwayBrowser/#/R-HSA-1643685;https://reactome.org/PathwayBrowser/#/R-HSA-168255;https://reactome.org/PathwayBrowser/#/R-HSA-168256;https://reactome.org/PathwayBrowser/#/R-HSA-168276;https://reactome.org/PathwayBrowser/#/…
O00635	E3 ubiquitin-protein ligase TRIM38 OS=Homo sapiens OX=9606 GN=TRIM38 PE=1 SV=1	TRIM38	0.848038	None	53.415	8	3	3	3	48170	40850	1.08223	0.917771	nucleus	K12014			GO:0002376 immune system process; GO:0006355 regulation of transcription, DNA-templated; GO:0006950 response to stress; GO:0006952 defense response; GO:0006955 immune response; GO:0007154 cell communication; GO:0007165 signal transduction; GO:0007166 cell surface receptor signaling pathway; GO:0009889 regulation of biosynthetic process; GO:0009966 regulation of signal transduction; GO:0009967 pos…	GO:0005622 intracellular anatomical structure; GO:0005737 cytoplasm; GO:0005829 cytosol;		PF15227; PF00643	PF15227 zinc finger of C3HC4-type, RING; PF00643 B-box zinc finger	O	KOG2177	Predicted E3 ubiquitin ligase				R-HSA-1280215 Cytokine Signaling in Immune system;R-HSA-168256 Immune System;R-HSA-877300 Interferon gamma signaling;R-HSA-913531 Interferon Signaling	https://reactome.org/PathwayBrowser/#/R-HSA-1280215;https://reactome.org/PathwayBrowser/#/R-HSA-168256;https://reactome.org/PathwayBrowser/#/R-HSA-877300;https://reactome.org/PathwayBrowser/#/R-HSA-913531
O00743	Serine/threonine-protein phosphatase 6 catalytic subunit OS=Homo sapiens OX=9606 GN=PPP6C PE=1 SV=1	PPP6C	1.11638	None	35.144	29.2	7	7	7	231920	258910	0.945012	1.05499	extracellular	K15498			GO:0000082 G1/S transition of mitotic cell cycle; GO:0000226 microtubule cytoskeleton organization; GO:0000278 mitotic cell cycle; GO:0001932 regulation of protein phosphorylation; GO:0001933 negative regulation of protein phosphorylation; GO:0006464 cellular protein modification process; GO:0006470 protein dephosphorylation; GO:0006793 phosphorus metabolic process; GO:0006796 phosphate-containin…	GO:0000235 astral microtubule; GO:0005622 intracellular anatomical structure; GO:0005737 cytoplasm; GO:0005818 aster; GO:0005819 spindle; GO:0005829 cytosol; GO:0005856 cytoskeleton; GO:0005874 microtubule; GO:0005876 spindle microtubule; GO:0005881 cytoplasmic microtubule; GO:0005938 cell cortex; GO:0015630 microtubule cytoskeleton; GO:0043226 organelle; GO:0043228 non-membrane-bounded organelle…	GO:0003824 catalytic activity; GO:0004721 phosphoprotein phosphatase activity; GO:0004722 protein serine/threonine phosphatase activity; GO:0016787 hydrolase activity; GO:0016788 hydrolase activity, acting on ester bonds; GO:0016791 phosphatase activity; GO:0042578 phosphoric ester hydrolase activity; GO:0140096 catalytic activity, acting on a protein;	PF00149	PF00149 Calcineurin-like phosphoesterase	DT	KOG0373	Serine/threonine specific protein phosphatase involved in cell cycle control, PP2A-related				R-HSA-157579 Telomere Maintenance;R-HSA-1640170 Cell Cycle;R-HSA-171319 Telomere Extension By Telomerase;R-HSA-180786 Extension of Telomeres;R-HSA-199977 ER to Golgi Anterograde Transport;R-HSA-199991 Membrane Trafficking;R-HSA-204005 COPII-mediated vesicle transport;R-HSA-392499 Metabolism of proteins;R-HSA-446203 Asparagine N-linked glycosylation;R-HSA-5653656 Vesicle-mediated transport;R-HSA-5…	https://reactome.org/PathwayBrowser/#/R-HSA-157579;https://reactome.org/PathwayBrowser/#/R-HSA-1640170;https://reactome.org/PathwayBrowser/#/R-HSA-171319;https://reactome.org/PathwayBrowser/#/R-HSA-180786;https://reactome.org/PathwayBrowser/#/R-HSA-199977;https://reactome.org/PathwayBrowser/#/R-HSA-199991;https://reactome.org/PathwayBrowser/#/R-HSA-204005;https://reactome.org/PathwayBrowser/#/R-H…
O00750	Phosphatidylinositol 4-phosphate 3-kinase C2 domain-containing subunit beta OS=Homo sapiens OX=9606 GN=PIK3C2B PE=1 SV=2	PIK3C2B		None	184.77	1.3	1	1	1	0	0			nucleus	K00923	PIK3C2; phosphatidylinositol-4-phosphate 3-kinase [EC:2.7.1.154]	hsa05132 Salmonella infection; hsa04070 Phosphatidylinositol signaling system; hsa00562 Inositol phosphate metabolism; hsa01100 Metabolic pathways	GO:0002119 nematode larval development; GO:0002164 larval development; GO:0003008 system process; GO:0003012 muscle system process; GO:0003013 circulatory system process; GO:0003018 vascular process in circulatory system; GO:0006629 lipid metabolic process; GO:0006644 phospholipid metabolic process; GO:0006650 glycerophospholipid metabolic process; GO:0006661 phosphatidylinositol biosynthetic pro…	GO:0005622 intracellular anatomical structure; GO:0005634 nucleus; GO:0005654 nucleoplasm; GO:0005737 cytoplasm; GO:0005768 endosome; GO:0005829 cytosol; GO:0005886 plasma membrane; GO:0005942 phosphatidylinositol 3-kinase complex; GO:0010008 endosome membrane; GO:0012505 endomembrane system; GO:0016020 membrane; GO:0019898 extrinsic component of membrane; GO:0030139 endocytic vesicle; GO:0031090…	GO:0003824 catalytic activity; GO:0005488 binding; GO:0005515 protein binding; GO:0005543 phospholipid binding; GO:0008289 lipid binding; GO:0016301 kinase activity; GO:0016303 1-phosphatidylinositol-3-kinase activity; GO:0016307 phosphatidylinositol phosphate kinase activity; GO:0016740 transferase activity; GO:0016772 transferase activity, transferring phosphorus-containing groups; GO:0016773 p…	PF00794; PF00792; PF00787; PF00168	PF00794 PI3-kinase family, ras-binding domain; PF00792 Phosphoinositide 3-kinase C2; PF00787 PX domain; PF00168 C2 domain	T	KOG0905	Phosphoinositide 3-kinase	WP710 DNA DAMAGE RESPONSE ONLY ATM DEPENDENT;WP437 EGFEGFR SIGNALING PATHWAY;WP3932 FOCAL ADHESION PI3KAKTMTORSIGNALING PATHWAY;WP2261 GLIOBLASTOMA SIGNALING PATHWAYS;WP4787 OSTEOBLAST DIFFERENTIATION AND RELATED DISEASES;WP4971 PHOSPHOINOSITIDES METABOLISM;WP51 REGULATION OF ACTIN CYTOSKELETON;WP26 S1P RECEPTOR SIGNAL TRANSDUCTION	http://www.wikipathways.org/instance/WP710_r116542;http://www.wikipathways.org/instance/WP437_r120689;http://www.wikipathways.org/instance/WP3932_r120304;http://www.wikipathways.org/instance/WP2261_r118379;http://www.wikipathways.org/instance/WP4787_r118872;http://www.wikipathways.org/instance/WP4971_r112223;http://www.wikipathways.org/instance/WP51_r116716;http://www.wikipathways.org/instance/WP…		R-HSA-1430728 Metabolism;R-HSA-1483255 PI Metabolism;R-HSA-1483257 Phospholipid metabolism;R-HSA-1660499 Synthesis of PIPs at the plasma membrane;R-HSA-556833 Metabolism of lipids	https://reactome.org/PathwayBrowser/#/R-HSA-1430728;https://reactome.org/PathwayBrowser/#/R-HSA-1483255;https://reactome.org/PathwayBrowser/#/R-HSA-1483257;https://reactome.org/PathwayBrowser/#/R-HSA-1660499;https://reactome.org/PathwayBrowser/#/R-HSA-556833
O00754	Lysosomal alpha-mannosidase OS=Homo sapiens OX=9606 GN=MAN2B1 PE=1 SV=3	MAN2B1	0.909581	None	113.74	10.8	7	7	7	165230	150290	1.04735	0.95265	extracellular	K12311	MAN2B1; lysosomal alpha-mannosidase [EC:3.2.1.24]	hsa04142 Lysosome; hsa00511 Other glycan degradation	GO:0001775 cell activation; GO:0002252 immune effector process; GO:0002263 cell activation involved in immune response; GO:0002274 myeloid leukocyte activation; GO:0002275 myeloid cell activation involved in immune response; GO:0002283 neutrophil activation involved in immune response; GO:0002366 leukocyte activation involved in immune response; GO:0002376 immune system process; GO:0002443 leukoc…	GO:0000323 lytic vacuole; GO:0005576 extracellular region; GO:0005615 extracellular space; GO:0005622 intracellular anatomical structure; GO:0005737 cytoplasm; GO:0005764 lysosome; GO:0005766 primary lysosome; GO:0005773 vacuole; GO:0005775 vacuolar lumen; GO:0012505 endomembrane system; GO:0030141 secretory granule; GO:0031410 cytoplasmic vesicle; GO:0031974 membrane-enclosed lumen; GO:0031982 v…	GO:0003824 catalytic activity; GO:0004553 hydrolase activity, hydrolyzing O-glycosyl compounds; GO:0004559 alpha-mannosidase activity; GO:0004571 mannosyl-oligosaccharide 1,2-alpha-mannosidase activity; GO:0005488 binding; GO:0005537 mannose binding; GO:0015923 mannosidase activity; GO:0015924 mannosyl-oligosaccharide mannosidase activity; GO:0016787 hydrolase activity; GO:0016798 hydrolase activ…	PF01074; PF09261; PF07748; PF17677	PF01074 Glycosyl hydrolases family 38 N-terminal domain; PF09261 Alpha mannosidase middle domain; PF07748 Glycosyl hydrolases family 38 C-terminal domain; PF17677 Glycosyl hydrolases family 38 C-terminal beta sandwich domain	G	KOG1959	Glycosyl hydrolase, family 38 - alpha-mannosidase				R-HSA-1430728 Metabolism;R-HSA-168249 Innate Immune System;R-HSA-168256 Immune System;R-HSA-6798695 Neutrophil degranulation;R-HSA-71387 Metabolism of carbohydrates;R-HSA-8853383 Lysosomal oligosaccharide catabolism	https://reactome.org/PathwayBrowser/#/R-HSA-1430728;https://reactome.org/PathwayBrowser/#/R-HSA-168249;https://reactome.org/PathwayBrowser/#/R-HSA-168256;https://reactome.org/PathwayBrowser/#/R-HSA-6798695;https://reactome.org/PathwayBrowser/#/R-HSA-71387;https://reactome.org/PathwayBrowser/#/R-HSA-8853383
O00762	Ubiquitin-conjugating enzyme E2 C OS=Homo sapiens OX=9606 GN=UBE2C PE=1 SV=1	UBE2C	1.5039	Up	19.652	16.8	2	2	2	49010	73706	0.798755	1.20125	cytoplasm	K06688	UBE2C; ubiquitin-conjugating enzyme E2 C [EC:2.3.2.23]	hsa04120 Ubiquitin mediated proteolysis	GO:0000209 protein polyubiquitination; GO:0000278 mitotic cell cycle; GO:0000280 nuclear division; GO:0006464 cellular protein modification process; GO:0006508 proteolysis; GO:0006511 ubiquitin-dependent protein catabolic process; GO:0006807 nitrogen compound metabolic process; GO:0006996 organelle organization; GO:0007049 cell cycle; GO:0007088 regulation of mitotic nuclear division; GO:0007096 …	GO:0000151 ubiquitin ligase complex; GO:0000152 nuclear ubiquitin ligase complex; GO:0005622 intracellular anatomical structure; GO:0005634 nucleus; GO:0005654 nucleoplasm; GO:0005680 anaphase-promoting complex; GO:0005737 cytoplasm; GO:0005829 cytosol; GO:0005886 plasma membrane; GO:0016020 membrane; GO:0031461 cullin-RING ubiquitin ligase complex; GO:0031974 membrane-enclosed lumen; GO:0031981 …	GO:0003824 catalytic activity; GO:0004842 ubiquitin-protein transferase activity; GO:0005488 binding; GO:0005515 protein binding; GO:0016740 transferase activity; GO:0019787 ubiquitin-like protein transferase activity; GO:0019899 enzyme binding; GO:0031625 ubiquitin protein ligase binding; GO:0044389 ubiquitin-like protein ligase binding; GO:0061630 ubiquitin protein ligase activity; GO:0061631 u…	PF00179	PF00179 Ubiquitin-conjugating enzyme	O	KOG0421	Ubiquitin-protein ligase	WP2361 GASTRIC CANCER NETWORK 1;WP2363 GASTRIC CANCER NETWORK 2	http://www.wikipathways.org/instance/WP2361_r117731;http://www.wikipathways.org/instance/WP2363_r117737		R-HSA-1280218 Adaptive Immune System;R-HSA-141405 Inhibition of the proteolytic activity of APC/C required for the onset of anaphase by mitotic spindle checkpoint components;R-HSA-141430 Inactivation of APC/C via direct inhibition of the APC/C complex;R-HSA-1640170 Cell Cycle;R-HSA-1643685 Disease;R-HSA-168256 Immune System;R-HSA-174048 APC/C:Cdc20 mediated degradation of Cyclin B;R-HSA-174084 Au…		G2M CHECKPOINT	https://www.gsea-msigdb.org/gsea/msigdb/cards/HALLMARK_G2M_CHECKPOINT
O00764	Pyridoxal kinase OS=Homo sapiens OX=9606 GN=PDXK PE=1 SV=1	PDXK	0.785288	None	35.102	31.4	7	7	7	328580	258030	1.12027	0.879733	cytoplasm	K00868	pdxK; pyridoxine kinase [EC:2.7.1.35]	hsa01240 Biosynthesis of cofactors; hsa00750 Vitamin B6 metabolism; hsa01100 Metabolic pathways	GO:0001775 cell activation; GO:0002252 immune effector process; GO:0002263 cell activation involved in immune response; GO:0002274 myeloid leukocyte activation; GO:0002275 myeloid cell activation involved in immune response; GO:0002283 neutrophil activation involved in immune response; GO:0002366 leukocyte activation involved in immune response; GO:0002376 immune system process; GO:0002443 leukoc…	GO:0005576 extracellular region; GO:0005622 intracellular anatomical structure; GO:0005634 nucleus; GO:0005654 nucleoplasm; GO:0005737 cytoplasm; GO:0005829 cytosol; GO:0012505 endomembrane system; GO:0030141 secretory granule; GO:0031410 cytoplasmic vesicle; GO:0031974 membrane-enclosed lumen; GO:0031981 nuclear lumen; GO:0031982 vesicle; GO:0031983 vesicle lumen; GO:0034774 secretory granule lu…	GO:0000166 nucleotide binding; GO:0000287 magnesium ion binding; GO:0003824 catalytic activity; GO:0005488 binding; GO:0005515 protein binding; GO:0005524 ATP binding; GO:0008270 zinc ion binding; GO:0008478 pyridoxal kinase activity; GO:0016301 kinase activity; GO:0016740 transferase activity; GO:0016772 transferase activity, transferring phosphorus-containing groups; GO:0016773 phosphotransfera…			H	KOG2599	Pyridoxal/pyridoxine/pyridoxamine kinase				R-HSA-1430728 Metabolism;R-HSA-168249 Innate Immune System;R-HSA-168256 Immune System;R-HSA-196849 Metabolism of water-soluble vitamins and cofactors;R-HSA-196854 Metabolism of vitamins and cofactors;R-HSA-6798695 Neutrophil degranulation;R-HSA-964975 Vitamins B6 activation to pyridoxal phosphate	https://reactome.org/PathwayBrowser/#/R-HSA-1430728;https://reactome.org/PathwayBrowser/#/R-HSA-168249;https://reactome.org/PathwayBrowser/#/R-HSA-168256;https://reactome.org/PathwayBrowser/#/R-HSA-196849;https://reactome.org/PathwayBrowser/#/R-HSA-196854;https://reactome.org/PathwayBrowser/#/R-HSA-6798695;https://reactome.org/PathwayBrowser/#/R-HSA-964975
O00767	Stearoyl-CoA desaturase OS=Homo sapiens OX=9606 GN=SCD PE=1 SV=2	SCD	1.8361	Up	41.522	17.8	3	3	3	847940	1556900	0.705195	1.29481	cytoplasm	K00507	SCD; stearoyl-CoA desaturase (Delta-9 desaturase) [EC:1.14.19.1]	hsa04936 Alcoholic liver disease; hsa03320 PPAR signaling pathway; hsa01040 Biosynthesis of unsaturated fatty acids; hsa01212 Fatty acid metabolism; hsa04152 AMPK signaling pathway; hsa01100 Metabolic pathways	GO:0000003 reproduction; GO:0000278 mitotic cell cycle; GO:0000281 mitotic cytokinesis; GO:0000910 cytokinesis; GO:0001101 response to acid chemical; GO:0001676 long-chain fatty acid metabolic process; GO:0002376 immune system process; GO:0006082 organic acid metabolic process; GO:0006139 nucleobase-containing compound metabolic process; GO:0006163 purine nucleotide metabolic process; GO:0006164 …	GO:0005622 intracellular anatomical structure; GO:0005634 nucleus; GO:0005730 nucleolus; GO:0005737 cytoplasm; GO:0005783 endoplasmic reticulum; GO:0005789 endoplasmic reticulum membrane; GO:0012505 endomembrane system; GO:0016020 membrane; GO:0016021 integral component of membrane; GO:0030176 integral component of endoplasmic reticulum membrane; GO:0031224 intrinsic component of membrane; GO:003…	GO:0003824 catalytic activity; GO:0004768 stearoyl-CoA 9-desaturase activity; GO:0005488 binding; GO:0005506 iron ion binding; GO:0016215 acyl-CoA desaturase activity; GO:0016491 oxidoreductase activity; GO:0016705 oxidoreductase activity, acting on paired donors, with incorporation or reduction of molecular oxygen; GO:0016717 oxidoreductase activity, acting on paired donors, with oxidation of a …			I	KOG1600	Fatty acid desaturase	WP236 ADIPOGENESIS;WP3915 ANGIOPOIETINLIKE PROTEIN 8 REGULATORY PATHWAY;WP4718 CHOLESTEROL METABOLISM WITH BLOCH AND KANDUTSCHRUSSELL PATHWAYS;WP357 FATTY ACID BIOSYNTHESIS;WP2874 LIVER X RECEPTOR PATHWAY;WP2882 NUCLEAR RECEPTORS METAPATHWAY;WP4724 OMEGA9 FATTY ACID SYNTHESIS;WP3942 PPAR SIGNALING PATHWAY;WP2011 SREBF AND MIR33 IN CHOLESTEROL AND LIPID HOMEOSTASIS;WP1982 STEROL REGULATORY ELEMENT…	http://www.wikipathways.org/instance/WP236_r105873;http://www.wikipathways.org/instance/WP3915_r120659;http://www.wikipathways.org/instance/WP4718_r119764;http://www.wikipathways.org/instance/WP357_r117722;http://www.wikipathways.org/instance/WP2874_r116465;http://www.wikipathways.org/instance/WP2882_r117808;http://www.wikipathways.org/instance/WP4724_r117812;http://www.wikipathways.org/instance/…		R-HSA-1430728 Metabolism;R-HSA-162582 Signal Transduction;R-HSA-1655829 Regulation of cholesterol biosynthesis by SREBP (SREBF);R-HSA-2426168 Activation of gene expression by SREBF (SREBP);R-HSA-556833 Metabolism of lipids;R-HSA-75105 Fatty acyl-CoA biosynthesis;R-HSA-8957322 Metabolism of steroids;R-HSA-8978868 Fatty acid metabolism;R-HSA-9006931 Signaling by Nuclear Receptors;R-HSA-9024446 NR1H…	https://reactome.org/PathwayBrowser/#/R-HSA-1430728;https://reactome.org/PathwayBrowser/#/R-HSA-162582;https://reactome.org/PathwayBrowser/#/R-HSA-1655829;https://reactome.org/PathwayBrowser/#/R-HSA-2426168;https://reactome.org/PathwayBrowser/#/R-HSA-556833;https://reactome.org/PathwayBrowser/#/R-HSA-75105;https://reactome.org/PathwayBrowser/#/R-HSA-8957322;https://reactome.org/PathwayBrowser/#/R…	ANDROGEN RESPONSE;CHOLESTEROL HOMEOSTASIS;MTORC1 SIGNALING;MYOGENESIS	https://www.gsea-msigdb.org/gsea/msigdb/cards/HALLMARK_ANDROGEN_RESPONSE;https://www.gsea-msigdb.org/gsea/msigdb/cards/HALLMARK_CHOLESTEROL_HOMEOSTASIS;https://www.gsea-msigdb.org/gsea/msigdb/cards/HALLMARK_MTORC1_SIGNALING;https://www.gsea-msigdb.org/gsea/msigdb/cards/HALLMARK_MYOGENESIS
O14497	AT-rich interactive domain-containing protein 1A OS=Homo sapiens OX=9606 GN=ARID1A PE=1 SV=3	ARID1A	0.997706	None	242.04	23.5	29	28	29	335610	334840	1.00115	0.998852	cytoplasm	K11653	ARID1; AT-rich interactive domain-containing protein 1	hsa05225 Hepatocellular carcinoma; hsa04714 Thermogenesis	GO:0000003 reproduction; GO:0000122 negative regulation of transcription by RNA polymerase II; GO:0001568 blood vessel development; GO:0001654 eye development; GO:0001704 formation of primary germ layer; GO:0001838 embryonic epithelial tube formation; GO:0001841 neural tube formation; GO:0001843 neural tube closure; GO:0001890 placenta development; GO:0001944 vasculature development; GO:0002009 m…	GO:0000228 nuclear chromosome; GO:0000785 chromatin; GO:0005622 intracellular anatomical structure; GO:0005634 nucleus; GO:0005654 nucleoplasm; GO:0005694 chromosome; GO:0005737 cytoplasm; GO:0005829 cytosol; GO:0005886 plasma membrane; GO:0016020 membrane; GO:0016514 SWI/SNF complex; GO:0031974 membrane-enclosed lumen; GO:0031981 nuclear lumen; GO:0032991 protein-containing complex; GO:0035060 b…	GO:0000981 DNA-binding transcription factor activity, RNA polymerase II-specific; GO:0003676 nucleic acid binding; GO:0003677 DNA binding; GO:0003700 DNA-binding transcription factor activity; GO:0003712 transcription coregulator activity; GO:0003713 transcription coactivator activity; GO:0005102 signaling receptor binding; GO:0005488 binding; GO:0005515 protein binding; GO:0008134 transcription …	PF01388	PF01388 ARID/BRIGHT DNA binding domain	B	KOG2510	SWI-SNF chromatin-remodeling complex protein	WP3651 PATHWAYS AFFECTED IN ADENOID CYSTIC CARCINOMA;WP4321 THERMOGENESIS;WP4204 TUMOR SUPPRESSOR ACTIVITY OF SMARCB1	http://www.wikipathways.org/instance/WP3651_r116547;http://www.wikipathways.org/instance/WP4321_r106178;http://www.wikipathways.org/instance/WP4204_r108297	Transcription factor	R-HSA-212436 Generic Transcription Pathway;R-HSA-3214858 RMTs methylate histone arginines;R-HSA-3247509 Chromatin modifying enzymes;R-HSA-4839726 Chromatin organization;R-HSA-73857 RNA Polymerase II Transcription;R-HSA-74160 Gene expression (Transcription);R-HSA-8878171 Transcriptional regulation by RUNX1;R-HSA-8939243 RUNX1 interacts with co-factors whose precise effect on RUNX1 targets is not k…	https://reactome.org/PathwayBrowser/#/R-HSA-212436;https://reactome.org/PathwayBrowser/#/R-HSA-3214858;https://reactome.org/PathwayBrowser/#/R-HSA-3247509;https://reactome.org/PathwayBrowser/#/R-HSA-4839726;https://reactome.org/PathwayBrowser/#/R-HSA-73857;https://reactome.org/PathwayBrowser/#/R-HSA-74160;https://reactome.org/PathwayBrowser/#/R-HSA-8878171;https://reactome.org/PathwayBrowser/#/R-…
O14519	Cyclin-dependent kinase 2-associated protein 1 OS=Homo sapiens OX=9606 GN=CDK2AP1 PE=1 SV=1	CDK2AP1	0.878622	None	12.365	27	3	3	3	142860	125520	1.06461	0.93539	mitochondria				GO:0001701 in utero embryonic development; GO:0001932 regulation of protein phosphorylation; GO:0001934 positive regulation of protein phosphorylation; GO:0006139 nucleobase-containing compound metabolic process; GO:0006259 DNA metabolic process; GO:0006260 DNA replication; GO:0006261 DNA-dependent DNA replication; GO:0006725 cellular aromatic compound metabolic process; GO:0006807 nitrogen compo…	GO:0005622 intracellular anatomical structure; GO:0005634 nucleus; GO:0005654 nucleoplasm; GO:0005737 cytoplasm; GO:0005829 cytosol; GO:0031974 membrane-enclosed lumen; GO:0031981 nuclear lumen; GO:0043226 organelle; GO:0043227 membrane-bounded organelle; GO:0043229 intracellular organelle; GO:0043231 intracellular membrane-bounded organelle; GO:0043233 organelle lumen; GO:0048471 perinuclear reg…	GO:0005488 binding; GO:0005515 protein binding; GO:0019899 enzyme binding; GO:0070182 DNA polymerase binding;			TD	KOG4713	Cyclin-dependent kinase 2-associated protein
O14530	Thioredoxin domain-containing protein 9 OS=Homo sapiens OX=9606 GN=TXNDC9 PE=1 SV=2	TXNDC9	1.20757	None	26.534	19	4	4	4	235870	284830	0.905973	1.09403	cytoplasm				GO:0000226 microtubule cytoskeleton organization; GO:0006139 nucleobase-containing compound metabolic process; GO:0006725 cellular aromatic compound metabolic process; GO:0006807 nitrogen compound metabolic process; GO:0006996 organelle organization; GO:0007010 cytoskeleton organization; GO:0007017 microtubule-based process; GO:0008152 metabolic process; GO:0008616 queuosine biosynthetic process;…	GO:0005622 intracellular anatomical structure; GO:0005634 nucleus; GO:0005737 cytoplasm; GO:0005813 centrosome; GO:0005815 microtubule organizing center; GO:0005829 cytosol; GO:0005856 cytoskeleton; GO:0015630 microtubule cytoskeleton; GO:0030496 midbody; GO:0043226 organelle; GO:0043227 membrane-bounded organelle; GO:0043228 non-membrane-bounded organelle; GO:0043229 intracellular organelle; GO:…		PF00085	PF00085 Thioredoxin	OC	KOG1672	ATP binding protein
O14544	Suppressor of cytokine signaling 6 OS=Homo sapiens OX=9606 GN=SOCS6 PE=1 SV=2	SOCS6		None	59.527	3.2	1	1	1	0	0			nucleus	K04699	SOCS6_7; suppressor of cytokine signaling 6/7	hsa04917 Prolactin signaling pathway; hsa04630 JAK-STAT signaling pathway	GO:0001932 regulation of protein phosphorylation; GO:0001933 negative regulation of protein phosphorylation; GO:0002682 regulation of immune system process; GO:0002683 negative regulation of immune system process; GO:0002694 regulation of leukocyte activation; GO:0002695 negative regulation of leukocyte activation; GO:0006464 cellular protein modification process; GO:0006469 negative regulation o…	GO:0001772 immunological synapse; GO:0005622 intracellular anatomical structure; GO:0005737 cytoplasm; GO:0005829 cytosol; GO:0005886 plasma membrane; GO:0016020 membrane; GO:0071944 cell periphery;	GO:0004857 enzyme inhibitor activity; GO:0004860 protein kinase inhibitor activity; GO:0019207 kinase regulator activity; GO:0019210 kinase inhibitor activity; GO:0019887 protein kinase regulator activity; GO:0030234 enzyme regulator activity; GO:0098772 molecular function regulator;	PF00017; PF07525	PF00017 SH2 domain; PF07525 SOCS box	T	KOG4566	Cytokine-inducible SH2 protein	WP304 KIT RECEPTOR SIGNALING PATHWAY	http://www.wikipathways.org/instance/WP304_r120696		R-HSA-1280215 Cytokine Signaling in Immune system;R-HSA-1433557 Signaling by SCF-KIT;R-HSA-1433559 Regulation of KIT signaling;R-HSA-162582 Signal Transduction;R-HSA-168256 Immune System;R-HSA-392499 Metabolism of proteins;R-HSA-597592 Post-translational protein modification;R-HSA-8951664 Neddylation;R-HSA-9006934 Signaling by Receptor Tyrosine Kinases;R-HSA-9607240 FLT3 Signaling;R-HSA-9706369 N…	https://reactome.org/PathwayBrowser/#/R-HSA-1280215;https://reactome.org/PathwayBrowser/#/R-HSA-1433557;https://reactome.org/PathwayBrowser/#/R-HSA-1433559;https://reactome.org/PathwayBrowser/#/R-HSA-162582;https://reactome.org/PathwayBrowser/#/R-HSA-168256;https://reactome.org/PathwayBrowser/#/R-HSA-392499;https://reactome.org/PathwayBrowser/#/R-HSA-597592;https://reactome.org/PathwayBrowser/#/R…
O14545	TRAF-type zinc finger domain-containing protein 1 OS=Homo sapiens OX=9606 GN=TRAFD1 PE=1 SV=1	TRAFD1	1.00358	None	64.84	11.9	5	5	5	87221	87533	0.998215	1.00179	nucleus				GO:0002682 regulation of immune system process; GO:0002683 negative regulation of immune system process; GO:0010033 response to organic substance; GO:0031347 regulation of defense response; GO:0031348 negative regulation of defense response; GO:0034097 response to cytokine; GO:0042221 response to chemical; GO:0045088 regulation of innate immune response; GO:0045824 negative regulation of innate i…													INTERFERON ALPHA RESPONSE;INTERFERON GAMMA RESPONSE;P53 PATHWAY	https://www.gsea-msigdb.org/gsea/msigdb/cards/HALLMARK_INTERFERON_ALPHA_RESPONSE;https://www.gsea-msigdb.org/gsea/msigdb/cards/HALLMARK_INTERFERON_GAMMA_RESPONSE;https://www.gsea-msigdb.org/gsea/msigdb/cards/HALLMARK_P53_PATHWAY
O14561	Acyl carrier protein, mitochondrial OS=Homo sapiens OX=9606 GN=NDUFAB1 PE=1 SV=3	NDUFAB1	0.938364	None	17.417	15.4	3	3	3	902550	846920	1.0318	0.968202	mitochondria	K03955	NDUFAB1; NADH dehydrogenase (ubiquinone) 1 alpha/beta subcomplex 1, acyl-carrier protein	hsa04932 Non-alcoholic fatty liver disease; hsa05208 Chemical carcinogenesis - reactive oxygen species; hsa05016 Huntington disease; hsa00190 Oxidative phosphorylation; hsa05415 Diabetic cardiomyopathy; hsa05012 Parkinson disease; hsa05010 Alzheimer disease; hsa04723 Retrograde endocannabinoid signaling; hsa04714 Thermogenesis; hsa05022 Pathways of neurodegeneration - multiple diseases; hsa05014 …	GO:0005975 carbohydrate metabolic process; GO:0006082 organic acid metabolic process; GO:0006091 generation of precursor metabolites and energy; GO:0006119 oxidative phosphorylation; GO:0006120 mitochondrial electron transport, NADH to ubiquinone; GO:0006139 nucleobase-containing compound metabolic process; GO:0006163 purine nucleotide metabolic process; GO:0006464 cellular protein modification p…	GO:0005622 intracellular anatomical structure; GO:0005634 nucleus; GO:0005654 nucleoplasm; GO:0005737 cytoplasm; GO:0005739 mitochondrion; GO:0005740 mitochondrial envelope; GO:0005743 mitochondrial inner membrane; GO:0005746 mitochondrial respirasome; GO:0005747 mitochondrial respiratory chain complex I; GO:0005759 mitochondrial matrix; GO:0005829 cytosol; GO:0016020 membrane; GO:0019866 organel…	GO:0000035 acyl binding; GO:0000036 acyl carrier activity; GO:0003824 catalytic activity; GO:0003954 NADH dehydrogenase activity; GO:0005488 binding; GO:0005504 fatty acid binding; GO:0005509 calcium ion binding; GO:0008137 NADH dehydrogenase (ubiquinone) activity; GO:0008289 lipid binding; GO:0016491 oxidoreductase activity; GO:0016651 oxidoreductase activity, acting on NAD(P)H; GO:0016655 oxido…	PF00550	PF00550 Phosphopantetheine attachment site	CIQ	KOG1748	Acyl carrier protein/NADH-ubiquinone oxidoreductase, NDUFAB1/SDAP subunit	WP111 ELECTRON TRANSPORT CHAIN OXPHOS SYSTEM IN MITOCHONDRIA;WP4324 MITOCHONDRIAL COMPLEX I ASSEMBLY MODEL OXPHOS SYSTEM;WP4396 NONALCOHOLIC FATTY LIVER DISEASE;WP623 OXIDATIVE PHOSPHORYLATION	http://www.wikipathways.org/instance/WP111_r117097;http://www.wikipathways.org/instance/WP4324_r98172;http://www.wikipathways.org/instance/WP4396_r98945;http://www.wikipathways.org/instance/WP623_r107189		R-HSA-1428517 The citric acid (TCA) cycle and respiratory electron transport;R-HSA-1430728 Metabolism;R-HSA-163200 Respiratory electron transport, ATP synthesis by chemiosmotic coupling, and heat production by uncoupling proteins.;R-HSA-389661 Glyoxylate metabolism and glycine degradation;R-HSA-556833 Metabolism of lipids;R-HSA-611105 Respiratory electron transport;R-HSA-6799198 Complex I biogene…	https://reactome.org/PathwayBrowser/#/R-HSA-1428517;https://reactome.org/PathwayBrowser/#/R-HSA-1430728;https://reactome.org/PathwayBrowser/#/R-HSA-163200;https://reactome.org/PathwayBrowser/#/R-HSA-389661;https://reactome.org/PathwayBrowser/#/R-HSA-556833;https://reactome.org/PathwayBrowser/#/R-HSA-611105;https://reactome.org/PathwayBrowser/#/R-HSA-6799198;https://reactome.org/PathwayBrowser/#/R…	ADIPOGENESIS;MYC TARGETS V1;OXIDATIVE PHOSPHORYLATION	https://www.gsea-msigdb.org/gsea/msigdb/cards/HALLMARK_ADIPOGENESIS;https://www.gsea-msigdb.org/gsea/msigdb/cards/HALLMARK_MYC_TARGETS_V1;https://www.gsea-msigdb.org/gsea/msigdb/cards/HALLMARK_OXIDATIVE_PHOSPHORYLATION
O14562	Ubiquitin domain-containing protein UBFD1 OS=Homo sapiens OX=9606 GN=UBFD1 PE=1 SV=2	UBFD1	1.12162	None	33.382	21	5	5	5	344920	386870	0.942675	1.05733	cytoplasm							PF00240	PF00240 Ubiquitin family	O	KOG1872	Ubiquitin-specific protease
O14569	Transmembrane reductase CYB561D2 OS=Homo sapiens OX=9606 GN=CYB561D2 PE=1 SV=1	CYB561D2		None	23.973	5.4	1	1	1	69514	69325			plasma membrane	K08371
O14576	Cytoplasmic dynein 1 intermediate chain 1 OS=Homo sapiens OX=9606 GN=DYNC1I1 PE=1 SV=2	DYNC1I1		None	72.955	5.3	1	1	1	0	0			nucleus	K10415	DYNC1I; dynein cytoplasmic 1 intermediate chain	hsa05132 Salmonella infection; hsa04145 Phagosome; hsa04962 Vasopressin-regulated water reabsorption	GO:0000003 reproduction; GO:0000226 microtubule cytoskeleton organization; GO:0001654 eye development; GO:0001754 eye photoreceptor cell differentiation; GO:0002376 immune system process; GO:0002478 antigen processing and presentation of exogenous peptide antigen; GO:0002495 antigen processing and presentation of peptide antigen via MHC class II; GO:0002504 antigen processing and presentation of …	GO:0000775 chromosome, centromeric region; GO:0000776 kinetochore; GO:0000922 spindle pole; GO:0005622 intracellular anatomical structure; GO:0005634 nucleus; GO:0005694 chromosome; GO:0005737 cytoplasm; GO:0005768 endosome; GO:0005819 spindle; GO:0005829 cytosol; GO:0005856 cytoskeleton; GO:0005868 cytoplasmic dynein complex; GO:0005875 microtubule associated complex; GO:0005929 cilium; GO:00125…	GO:0003774 cytoskeletal motor activity; GO:0003777 microtubule motor activity; GO:0003824 catalytic activity; GO:0005488 binding; GO:0005515 protein binding; GO:0008017 microtubule binding; GO:0008092 cytoskeletal protein binding; GO:0015631 tubulin binding; GO:0016462 pyrophosphatase activity; GO:0016787 hydrolase activity; GO:0016817 hydrolase activity, acting on acid anhydrides; GO:0016818 hyd…			Z	KOG1587	Cytoplasmic dynein intermediate chain	WP4532 INTRAFLAGELLAR TRANSPORT PROTEINS BINDING TO DYNEIN;WP5085 VASOPRESSINREGULATED WATER REABSORPTION	http://www.wikipathways.org/instance/WP4532_r103287;http://www.wikipathways.org/instance/WP5085_r119785		R-HSA-1280218 Adaptive Immune System;R-HSA-141424 Amplification of signal from the kinetochores;R-HSA-141444 Amplification of signal from unattached kinetochores via a MAD2 inhibitory signal;R-HSA-162582 Signal Transduction;R-HSA-1632852 Macroautophagy;R-HSA-1640170 Cell Cycle;R-HSA-1643685 Disease;R-HSA-168256 Immune System;R-HSA-194315 Signaling by Rho GTPases;R-HSA-195258 RHO GTPase Effectors;…
O14578	Citron Rho-interacting kinase OS=Homo sapiens OX=9606 GN=CIT PE=1 SV=2	CIT	1.27548	None	231.43	7.6	11	11	11	87371	111440	0.878935	1.12106	nucleus	K16308			GO:0000003 reproduction; GO:0000070 mitotic sister chromatid segregation; GO:0000086 G2/M transition of mitotic cell cycle; GO:0000278 mitotic cell cycle; GO:0000280 nuclear division; GO:0000281 mitotic cytokinesis; GO:0000819 sister chromatid segregation; GO:0000910 cytokinesis; GO:0000912 assembly of actomyosin apparatus involved in cytokinesis; GO:0000915 actomyosin contractile ring assembly; …	GO:0001726 ruffle; GO:0005622 intracellular anatomical structure; GO:0005737 cytoplasm; GO:0005773 vacuole; GO:0005794 Golgi apparatus; GO:0005795 Golgi stack; GO:0005826 actomyosin contractile ring; GO:0005829 cytosol; GO:0005856 cytoskeleton; GO:0005886 plasma membrane; GO:0005938 cell cortex; GO:0012505 endomembrane system; GO:0015629 actin cytoskeleton; GO:0016020 membrane; GO:0030496 midbody…	GO:0003824 catalytic activity; GO:0004672 protein kinase activity; GO:0004674 protein serine/threonine kinase activity; GO:0005488 binding; GO:0005515 protein binding; GO:0016301 kinase activity; GO:0016740 transferase activity; GO:0016772 transferase activity, transferring phosphorus-containing groups; GO:0016773 phosphotransferase activity, alcohol group as acceptor; GO:0019899 enzyme binding; …	PF00069; PF00169	PF00069 Protein kinase domain; PF00169 PH domain	T	KOG0976	Rho/Rac1-interacting serine/threonine kinase Citron	WP524 G13 SIGNALING PATHWAY;WP5087 MALIGNANT PLEURAL MESOTHELIOMA	http://www.wikipathways.org/instance/WP524_r117113;http://www.wikipathways.org/instance/WP5087_r120373		R-HSA-162582 Signal Transduction;R-HSA-194315 Signaling by Rho GTPases;R-HSA-195258 RHO GTPase Effectors;R-HSA-5625900 RHO GTPases activate CIT;R-HSA-8980692 RHOA GTPase cycle;R-HSA-9012999 RHO GTPase cycle;R-HSA-9013026 RHOB GTPase cycle;R-HSA-9013106 RHOC GTPase cycle;R-HSA-9013149 RAC1 GTPase cycle;R-HSA-9716542 Signaling by Rho GTPases, Miro GTPases and RHOBTB3	https://reactome.org/PathwayBrowser/#/R-HSA-162582;https://reactome.org/PathwayBrowser/#/R-HSA-194315;https://reactome.org/PathwayBrowser/#/R-HSA-195258;https://reactome.org/PathwayBrowser/#/R-HSA-5625900;https://reactome.org/PathwayBrowser/#/R-HSA-8980692;https://reactome.org/PathwayBrowser/#/R-HSA-9012999;https://reactome.org/PathwayBrowser/#/R-HSA-9013026;https://reactome.org/PathwayBrowser/#/…	E2F TARGETS	https://www.gsea-msigdb.org/gsea/msigdb/cards/HALLMARK_E2F_TARGETS
O14579	Coatomer subunit epsilon OS=Homo sapiens OX=9606 GN=COPE PE=1 SV=3	COPE	1.05811	None	34.482	41.2	8	8	8	1159900	1227300	0.971766	1.02823	cytoplasm	K17268			GO:0006810 transport; GO:0006888 endoplasmic reticulum to Golgi vesicle-mediated transport; GO:0006890 retrograde vesicle-mediated transport, Golgi to endoplasmic reticulum; GO:0006891 intra-Golgi vesicle-mediated transport; GO:0016192 vesicle-mediated transport; GO:0046907 intracellular transport; GO:0048193 Golgi vesicle transport; GO:0051179 localization; GO:0051234 establishment of localizati…	GO:0000139 Golgi membrane; GO:0005622 intracellular anatomical structure; GO:0005634 nucleus; GO:0005654 nucleoplasm; GO:0005737 cytoplasm; GO:0005783 endoplasmic reticulum; GO:0005789 endoplasmic reticulum membrane; GO:0005794 Golgi apparatus; GO:0005798 Golgi-associated vesicle; GO:0005829 cytosol; GO:0012505 endomembrane system; GO:0012506 vesicle membrane; GO:0016020 membrane; GO:0030117 memb…				U	KOG3081	Vesicle coat complex COPI, epsilon subunit				R-HSA-199977 ER to Golgi Anterograde Transport;R-HSA-199991 Membrane Trafficking;R-HSA-392499 Metabolism of proteins;R-HSA-446203 Asparagine N-linked glycosylation;R-HSA-5653656 Vesicle-mediated transport;R-HSA-597592 Post-translational protein modification;R-HSA-6807878 COPI-mediated anterograde transport;R-HSA-6811434 COPI-dependent Golgi-to-ER retrograde traffic;R-HSA-6811442 Intra-Golgi and r…	https://reactome.org/PathwayBrowser/#/R-HSA-199977;https://reactome.org/PathwayBrowser/#/R-HSA-199991;https://reactome.org/PathwayBrowser/#/R-HSA-392499;https://reactome.org/PathwayBrowser/#/R-HSA-446203;https://reactome.org/PathwayBrowser/#/R-HSA-5653656;https://reactome.org/PathwayBrowser/#/R-HSA-597592;https://reactome.org/PathwayBrowser/#/R-HSA-6807878;https://reactome.org/PathwayBrowser/#/R-…	PROTEIN SECRETION	https://www.gsea-msigdb.org/gsea/msigdb/cards/HALLMARK_PROTEIN_SECRETION
O14602	Eukaryotic translation initiation factor 1A, Y-chromosomal OS=Homo sapiens OX=9606 GN=EIF1AY PE=1 SV=4	EIF1AY		None	16.442	31.2	4	1	1	0	0			cytoplasm,nucleus	K03236						PF01176	PF01176 Translation initiation factor 1A / IF-1	J	KOG3403	Translation initiation factor 1A (eIF-1A)	WP107 TRANSLATION FACTORS	http://www.wikipathways.org/instance/WP107_r117851
O14617	AP-3 complex subunit delta-1 OS=Homo sapiens OX=9606 GN=AP3D1 PE=1 SV=1	AP3D1	1.00382	None	130.16	31.4	28	28	28	487190	489050	0.998095	1.00191	cytoplasm	K12396	AP3D; AP-3 complex subunit delta	hsa04142 Lysosome	GO:0000041 transition metal ion transport; GO:0002376 immune system process; GO:0002475 antigen processing and presentation via MHC class Ib; GO:0002682 regulation of immune system process; GO:0002684 positive regulation of immune system process; GO:0002694 regulation of leukocyte activation; GO:0002696 positive regulation of leukocyte activation; GO:0006725 cellular aromatic compound metabolic p…	GO:0005622 intracellular anatomical structure; GO:0005737 cytoplasm; GO:0005768 endosome; GO:0005770 late endosome; GO:0005783 endoplasmic reticulum; GO:0005794 Golgi apparatus; GO:0005795 Golgi stack; GO:0005798 Golgi-associated vesicle; GO:0005802 trans-Golgi network; GO:0010008 endosome membrane; GO:0012505 endomembrane system; GO:0016020 membrane; GO:0030117 membrane coat; GO:0030119 AP-type …	GO:0005215 transporter activity;			U	KOG1059	Vesicle coat complex AP-3, delta subunit
O14618	Copper chaperone for superoxide dismutase OS=Homo sapiens OX=9606 GN=CCS PE=1 SV=1	CCS	1.27431	None	29.04	18.6	3	3	3	46141	58798	0.879387	1.12061	extracellular	K04569	CCS; copper chaperone for superoxide dismutase	hsa05022 Pathways of neurodegeneration - multiple diseases; hsa05014 Amyotrophic lateral sclerosis	GO:0000041 transition metal ion transport; GO:0006801 superoxide metabolic process; GO:0006810 transport; GO:0006811 ion transport; GO:0006812 cation transport; GO:0006825 copper ion transport; GO:0006950 response to stress; GO:0006979 response to oxidative stress; GO:0007275 multicellular organism development; GO:0007568 aging; GO:0008152 metabolic process; GO:0008340 determination of adult life…	GO:0005622 intracellular anatomical structure; GO:0005634 nucleus; GO:0005737 cytoplasm; GO:0005739 mitochondrion; GO:0005740 mitochondrial envelope; GO:0005758 mitochondrial intermembrane space; GO:0005777 peroxisome; GO:0005829 cytosol; GO:0031967 organelle envelope; GO:0031970 organelle envelope lumen; GO:0031974 membrane-enclosed lumen; GO:0031975 envelope; GO:0042579 microbody; GO:0043226 or…	GO:0003824 catalytic activity; GO:0005488 binding; GO:0005507 copper ion binding; GO:0005515 protein binding; GO:0008047 enzyme activator activity; GO:0008270 zinc ion binding; GO:0015035 protein-disulfide reductase activity; GO:0015036 disulfide oxidoreductase activity; GO:0016491 oxidoreductase activity; GO:0016530 metallochaperone activity; GO:0016531 copper chaperone activity; GO:0016532 supe…	PF00403; PF00080	PF00403 Heavy-metal-associated domain; PF00080 Copper/zinc superoxide dismutase (SODC)	P	KOG4656	Copper chaperone for superoxide dismutase	WP2447 AMYOTROPHIC LATERAL SCLEROSIS ALS;WP3286 COPPER HOMEOSTASIS	http://www.wikipathways.org/instance/WP2447_r113794;http://www.wikipathways.org/instance/WP3286_r106367		R-HSA-2262752 Cellular responses to stress;R-HSA-3299685 Detoxification of Reactive Oxygen Species;R-HSA-8953897 Cellular responses to stimuli;R-HSA-9711123 Cellular response to chemical stress	https://reactome.org/PathwayBrowser/#/R-HSA-2262752;https://reactome.org/PathwayBrowser/#/R-HSA-3299685;https://reactome.org/PathwayBrowser/#/R-HSA-8953897;https://reactome.org/PathwayBrowser/#/R-HSA-9711123
O14646	Chromodomain-helicase-DNA-binding protein 1 OS=Homo sapiens OX=9606 GN=CHD1 PE=1 SV=2	CHD1	1.11499	None	196.69	16.4	19	14	19	119310	133030	0.945629	1.05437	nucleus	K11367			GO:0000003 reproduction; GO:0002009 morphogenesis of an epithelium; GO:0002165 instar larval or pupal development; GO:0003006 developmental process involved in reproduction; GO:0006139 nucleobase-containing compound metabolic process; GO:0006325 chromatin organization; GO:0006333 chromatin assembly or disassembly; GO:0006338 chromatin remodeling; GO:0006355 regulation of transcription, DNA-templa…	GO:0001650 fibrillar center; GO:0005622 intracellular anatomical structure; GO:0005634 nucleus; GO:0005654 nucleoplasm; GO:0005694 chromosome; GO:0005700 polytene chromosome; GO:0005703 polytene chromosome puff; GO:0005705 polytene chromosome interband; GO:0005730 nucleolus; GO:0005737 cytoplasm; GO:0030684 preribosome; GO:0030688 preribosome, small subunit precursor; GO:0031974 membrane-enclosed…	GO:0000976 transcription cis-regulatory region binding; GO:0000977 RNA polymerase II transcription regulatory region sequence-specific DNA binding; GO:0000978 RNA polymerase II cis-regulatory region sequence-specific DNA binding; GO:0000987 cis-regulatory region sequence-specific DNA binding; GO:0001067 transcription regulatory region nucleic acid binding; GO:0003676 nucleic acid binding; GO:0003…	PF00385; PF00176; PF00271; PF18375; PF13907	PF00385 Chromo (CHRromatin Organisation MOdifier) domain; PF00176 SNF2-related domain; PF00271 Helicase conserved C-terminal domain; PF18375 CDH1/2 SANT-Helical linker 1; PF13907 Domain of unknown function (DUF4208)	K	KOG0384	Chromodomain-helicase DNA-binding protein	WP5144 NRP1TRIGGERED SIGNALING PATHWAYS IN PANCREATIC CANCER	http://www.wikipathways.org/instance/WP5144_r120537	Transcription factor	R-HSA-162582 Signal Transduction;R-HSA-8939211 ESR-mediated signaling;R-HSA-9006931 Signaling by Nuclear Receptors;R-HSA-9018519 Estrogen-dependent gene expression	https://reactome.org/PathwayBrowser/#/R-HSA-162582;https://reactome.org/PathwayBrowser/#/R-HSA-8939211;https://reactome.org/PathwayBrowser/#/R-HSA-9006931;https://reactome.org/PathwayBrowser/#/R-HSA-9018519
O14647	Chromodomain-helicase-DNA-binding protein 2 OS=Homo sapiens OX=9606 GN=CHD2 PE=1 SV=2	CHD2	0.809318	None	211.34	8.9	12	7	7	80663	65282	1.10539	0.894611	nucleus	K20091			GO:0000003 reproduction; GO:0002009 morphogenesis of an epithelium; GO:0002165 instar larval or pupal development; GO:0002244 hematopoietic progenitor cell differentiation; GO:0002376 immune system process; GO:0002520 immune system development; GO:0003006 developmental process involved in reproduction; GO:0006325 chromatin organization; GO:0006338 chromatin remodeling; GO:0006355 regulation of tr…	GO:0001650 fibrillar center; GO:0005622 intracellular anatomical structure; GO:0005634 nucleus; GO:0005654 nucleoplasm; GO:0005694 chromosome; GO:0005700 polytene chromosome; GO:0005703 polytene chromosome puff; GO:0005705 polytene chromosome interband; GO:0005730 nucleolus; GO:0005737 cytoplasm; GO:0031974 membrane-enclosed lumen; GO:0031981 nuclear lumen; GO:0043226 organelle; GO:0043227 membra…	GO:0000976 transcription cis-regulatory region binding; GO:0000977 RNA polymerase II transcription regulatory region sequence-specific DNA binding; GO:0000978 RNA polymerase II cis-regulatory region sequence-specific DNA binding; GO:0000987 cis-regulatory region sequence-specific DNA binding; GO:0001067 transcription regulatory region nucleic acid binding; GO:0003676 nucleic acid binding; GO:0003…	PF00385; PF00176; PF00271; PF18375; PF13907	PF00385 Chromo (CHRromatin Organisation MOdifier) domain; PF00176 SNF2-related domain; PF00271 Helicase conserved C-terminal domain; PF18375 CDH1/2 SANT-Helical linker 1; PF13907 Domain of unknown function (DUF4208)	K	KOG0384	Chromodomain-helicase DNA-binding protein	WP4673 MALE INFERTILITY;WP5144 NRP1TRIGGERED SIGNALING PATHWAYS IN PANCREATIC CANCER;WP3995 PRION DISEASE PATHWAY	http://www.wikipathways.org/instance/WP4673_r119920;http://www.wikipathways.org/instance/WP5144_r120537;http://www.wikipathways.org/instance/WP3995_r119304	Transcription factor
O14653	Golgi SNAP receptor complex member 2 OS=Homo sapiens OX=9606 GN=GOSR2 PE=1 SV=2	GOSR2	1.12093	None	24.775	26.9	4	4	4	204330	229040	0.942982	1.05702	cytoplasm	K08496	GOSR2; golgi SNAP receptor complex member 2	hsa04130 SNARE interactions in vesicular transport	GO:0006605 protein targeting; GO:0006623 protein targeting to vacuole; GO:0006810 transport; GO:0006886 intracellular protein transport; GO:0006888 endoplasmic reticulum to Golgi vesicle-mediated transport; GO:0006891 intra-Golgi vesicle-mediated transport; GO:0006892 post-Golgi vesicle-mediated transport; GO:0006896 Golgi to vacuole transport; GO:0006900 vesicle budding from membrane; GO:0006901…	GO:0000139 Golgi membrane; GO:0005622 intracellular anatomical structure; GO:0005737 cytoplasm; GO:0005768 endosome; GO:0005770 late endosome; GO:0005783 endoplasmic reticulum; GO:0005789 endoplasmic reticulum membrane; GO:0005793 endoplasmic reticulum-Golgi intermediate compartment; GO:0005794 Golgi apparatus; GO:0005798 Golgi-associated vesicle; GO:0010008 endosome membrane; GO:0012505 endomemb…	GO:0000149 SNARE binding; GO:0005484 SNAP receptor activity; GO:0005488 binding; GO:0005515 protein binding;	PF12352	PF12352 Snare region anchored in the vesicle membrane C-terminus	U	KOG3251	Golgi SNAP receptor complex member				R-HSA-199977 ER to Golgi Anterograde Transport;R-HSA-199991 Membrane Trafficking;R-HSA-204005 COPII-mediated vesicle transport;R-HSA-2262752 Cellular responses to stress;R-HSA-381038 XBP1(S) activates chaperone genes;R-HSA-381070 IRE1alpha activates chaperones;R-HSA-381119 Unfolded Protein Response (UPR);R-HSA-392499 Metabolism of proteins;R-HSA-446203 Asparagine N-linked glycosylation;R-HSA-5653…	https://reactome.org/PathwayBrowser/#/R-HSA-199977;https://reactome.org/PathwayBrowser/#/R-HSA-199991;https://reactome.org/PathwayBrowser/#/R-HSA-204005;https://reactome.org/PathwayBrowser/#/R-HSA-2262752;https://reactome.org/PathwayBrowser/#/R-HSA-381038;https://reactome.org/PathwayBrowser/#/R-HSA-381070;https://reactome.org/PathwayBrowser/#/R-HSA-381119;https://reactome.org/PathwayBrowser/#/R-H…	PROTEIN SECRETION;UNFOLDED PROTEIN RESPONSE	https://www.gsea-msigdb.org/gsea/msigdb/cards/HALLMARK_PROTEIN_SECRETION;https://www.gsea-msigdb.org/gsea/msigdb/cards/HALLMARK_UNFOLDED_PROTEIN_RESPONSE
O14656	Torsin-1A OS=Homo sapiens OX=9606 GN=TOR1A PE=1 SV=1	TOR1A	0.904377	None	37.808	22.9	7	7	7	122460	110750	1.05021	0.949788	endoplasmic reticulum	K22990			GO:0000338 protein deneddylation; GO:0001505 regulation of neurotransmitter levels; GO:0001558 regulation of cell growth; GO:0002009 morphogenesis of an epithelium; GO:0002011 morphogenesis of an epithelial sheet; GO:0002164 larval development; GO:0002165 instar larval or pupal development; GO:0002168 instar larval development; GO:0006403 RNA localization; GO:0006405 RNA export from nucleus; GO:0…	GO:0000922 spindle pole; GO:0005622 intracellular anatomical structure; GO:0005634 nucleus; GO:0005635 nuclear envelope; GO:0005737 cytoplasm; GO:0005783 endoplasmic reticulum; GO:0005788 endoplasmic reticulum lumen; GO:0005789 endoplasmic reticulum membrane; GO:0005818 aster; GO:0005819 spindle; GO:0005829 cytosol; GO:0005856 cytoskeleton; GO:0005886 plasma membrane; GO:0008021 synaptic vesicle;…	GO:0000166 nucleotide binding; GO:0003824 catalytic activity; GO:0005488 binding; GO:0005515 protein binding; GO:0005524 ATP binding; GO:0008092 cytoskeletal protein binding; GO:0016462 pyrophosphatase activity; GO:0016787 hydrolase activity; GO:0016817 hydrolase activity, acting on acid anhydrides; GO:0016818 hydrolase activity, acting on acid anhydrides, in phosphorus-containing anhydrides; GO:…			R	KOG2170	ATPase of the AAA+ superfamily				R-HSA-199991 Membrane Trafficking;R-HSA-5653656 Vesicle-mediated transport;R-HSA-8856825 Cargo recognition for clathrin-mediated endocytosis;R-HSA-8856828 Clathrin-mediated endocytosis	https://reactome.org/PathwayBrowser/#/R-HSA-199991;https://reactome.org/PathwayBrowser/#/R-HSA-5653656;https://reactome.org/PathwayBrowser/#/R-HSA-8856825;https://reactome.org/PathwayBrowser/#/R-HSA-8856828
O14657	Torsin-1B OS=Homo sapiens OX=9606 GN=TOR1B PE=1 SV=2	TOR1B	1.07177	None	37.978	23.8	6	6	6	105620	113200	0.96536	1.03464	extracellular	K22990			GO:0001558 regulation of cell growth; GO:0002164 larval development; GO:0002165 instar larval or pupal development; GO:0002168 instar larval development; GO:0006403 RNA localization; GO:0006405 RNA export from nucleus; GO:0006611 protein export from nucleus; GO:0006629 lipid metabolic process; GO:0006643 membrane lipid metabolic process; GO:0006810 transport; GO:0006886 intracellular protein tran…	GO:0000922 spindle pole; GO:0005622 intracellular anatomical structure; GO:0005634 nucleus; GO:0005635 nuclear envelope; GO:0005737 cytoplasm; GO:0005783 endoplasmic reticulum; GO:0005788 endoplasmic reticulum lumen; GO:0005818 aster; GO:0005819 spindle; GO:0005856 cytoskeleton; GO:0005886 plasma membrane; GO:0012505 endomembrane system; GO:0015630 microtubule cytoskeleton; GO:0016020 membrane; G…	GO:0000166 nucleotide binding; GO:0003824 catalytic activity; GO:0005488 binding; GO:0005524 ATP binding; GO:0016462 pyrophosphatase activity; GO:0016787 hydrolase activity; GO:0016817 hydrolase activity, acting on acid anhydrides; GO:0016818 hydrolase activity, acting on acid anhydrides, in phosphorus-containing anhydrides; GO:0016887 ATP hydrolysis activity; GO:0017076 purine nucleotide binding…			R	KOG2170	ATPase of the AAA+ superfamily				R-HSA-199991 Membrane Trafficking;R-HSA-5653656 Vesicle-mediated transport;R-HSA-8856825 Cargo recognition for clathrin-mediated endocytosis;R-HSA-8856828 Clathrin-mediated endocytosis	https://reactome.org/PathwayBrowser/#/R-HSA-199991;https://reactome.org/PathwayBrowser/#/R-HSA-5653656;https://reactome.org/PathwayBrowser/#/R-HSA-8856825;https://reactome.org/PathwayBrowser/#/R-HSA-8856828	INTERFERON GAMMA RESPONSE	https://www.gsea-msigdb.org/gsea/msigdb/cards/HALLMARK_INTERFERON_GAMMA_RESPONSE
O14662	Syntaxin-16 OS=Homo sapiens OX=9606 GN=STX16 PE=1 SV=3	STX16		None	37.031	15.1	3	3	3	0	0			mitochondria	K08489	STX16; syntaxin 16	hsa04130 SNARE interactions in vesicular transport	GO:0001505 regulation of neurotransmitter levels; GO:0006810 transport; GO:0006836 neurotransmitter transport; GO:0006886 intracellular protein transport; GO:0006887 exocytosis; GO:0006904 vesicle docking involved in exocytosis; GO:0006906 vesicle fusion; GO:0006996 organelle organization; GO:0007030 Golgi organization; GO:0007154 cell communication; GO:0007267 cell-cell signaling; GO:0007268 che…	GO:0000139 Golgi membrane; GO:0000323 lytic vacuole; GO:0005622 intracellular anatomical structure; GO:0005737 cytoplasm; GO:0005764 lysosome; GO:0005773 vacuole; GO:0005794 Golgi apparatus; GO:0005795 Golgi stack; GO:0005802 trans-Golgi network; GO:0005829 cytosol; GO:0005886 plasma membrane; GO:0012505 endomembrane system; GO:0016020 membrane; GO:0016021 integral component of membrane; GO:00310…	GO:0000149 SNARE binding; GO:0005484 SNAP receptor activity; GO:0005488 binding; GO:0005515 protein binding; GO:0019905 syntaxin binding;	PF00804	PF00804 Syntaxin	U	KOG0809	SNARE protein TLG2/Syntaxin 16	WP2858 ECTODERM DIFFERENTIATION	http://www.wikipathways.org/instance/WP2858_r116763		R-HSA-199991 Membrane Trafficking;R-HSA-5653656 Vesicle-mediated transport;R-HSA-6811438 Intra-Golgi traffic;R-HSA-6811440 Retrograde transport at the Trans-Golgi-Network;R-HSA-6811442 Intra-Golgi and retrograde Golgi-to-ER traffic	https://reactome.org/PathwayBrowser/#/R-HSA-199991;https://reactome.org/PathwayBrowser/#/R-HSA-5653656;https://reactome.org/PathwayBrowser/#/R-HSA-6811438;https://reactome.org/PathwayBrowser/#/R-HSA-6811440;https://reactome.org/PathwayBrowser/#/R-HSA-6811442	PROTEIN SECRETION	https://www.gsea-msigdb.org/gsea/msigdb/cards/HALLMARK_PROTEIN_SECRETION
O14672	Disintegrin and metalloproteinase domain-containing protein 10 OS=Homo sapiens OX=9606 GN=ADAM10 PE=1 SV=1	ADAM10	1.07904	None	84.141	27.4	13	13	13	133730	144300	0.961983	1.03802	plasma membrane	K06704	ADAM10; disintegrin and metalloproteinase domain-containing protein 10 [EC:3.4.24.81]	hsa05120 Epithelial cell signaling in Helicobacter pylori infection; hsa05010 Alzheimer disease	GO:0000003 reproduction; GO:0000902 cell morphogenesis; GO:0000904 cell morphogenesis involved in differentiation; GO:0001558 regulation of cell growth; GO:0001655 urogenital system development; GO:0001667 ameboidal-type cell migration; GO:0001701 in utero embryonic development; GO:0001708 cell fate specification; GO:0001709 cell fate determination; GO:0001775 cell activation; GO:0002064 epitheli…	GO:0005622 intracellular anatomical structure; GO:0005634 nucleus; GO:0005737 cytoplasm; GO:0005783 endoplasmic reticulum; GO:0005788 endoplasmic reticulum lumen; GO:0005794 Golgi apparatus; GO:0005798 Golgi-associated vesicle; GO:0005802 trans-Golgi network; GO:0005886 plasma membrane; GO:0009986 cell surface; GO:0012505 endomembrane system; GO:0012506 vesicle membrane; GO:0014069 postsynaptic d…	GO:0003824 catalytic activity; GO:0004175 endopeptidase activity; GO:0004222 metalloendopeptidase activity; GO:0005102 signaling receptor binding; GO:0005178 integrin binding; GO:0005488 binding; GO:0005515 protein binding; GO:0008233 peptidase activity; GO:0008237 metallopeptidase activity; GO:0016787 hydrolase activity; GO:0019899 enzyme binding; GO:0019900 kinase binding; GO:0019901 protein ki…	PF13574; PF00200	PF13574 Metallo-peptidase family M12B Reprolysin-like; PF00200 Disintegrin	W	KOG3658	Tumor necrosis factor-alpha-converting enzyme (TACE/ADAM17) and related metalloproteases	WP4906 3Q29 COPY NUMBER VARIATION SYNDROME;WP5124 ALZHEIMERS DISEASE;WP2059 ALZHEIMERS DISEASE AND MIRNA EFFECTS;WP3845 CANONICAL AND NONCANONICAL NOTCH SIGNALING;WP3286 COPPER HOMEOSTASIS;WP516 HYPERTROPHY MODEL;WP5092 INTERACTIONS OF NATURAL KILLER CELLS IN PANCREATIC CANCER;WP3888 VEGFAVEGFR2 SIGNALING PATHWAY	http://www.wikipathways.org/instance/WP4906_r115773;http://www.wikipathways.org/instance/WP5124_r119432;http://www.wikipathways.org/instance/WP2059_r119468;http://www.wikipathways.org/instance/WP3845_r116460;http://www.wikipathways.org/instance/WP3286_r106367;http://www.wikipathways.org/instance/WP516_r117755;http://www.wikipathways.org/instance/WP5092_r119997;http://www.wikipathways.org/instance…		R-HSA-1266738 Developmental Biology;R-HSA-1442490 Collagen degradation;R-HSA-1474228 Degradation of the extracellular matrix;R-HSA-1474244 Extracellular matrix organization;R-HSA-157118 Signaling by NOTCH;R-HSA-162582 Signal Transduction;R-HSA-1643685 Disease;R-HSA-168249 Innate Immune System;R-HSA-168256 Immune System;R-HSA-177929 Signaling by EGFR;R-HSA-1980143 Signaling by NOTCH1;R-HSA-1980145…	https://reactome.org/PathwayBrowser/#/R-HSA-1266738;https://reactome.org/PathwayBrowser/#/R-HSA-1442490;https://reactome.org/PathwayBrowser/#/R-HSA-1474228;https://reactome.org/PathwayBrowser/#/R-HSA-1474244;https://reactome.org/PathwayBrowser/#/R-HSA-157118;https://reactome.org/PathwayBrowser/#/R-HSA-162582;https://reactome.org/PathwayBrowser/#/R-HSA-1643685;https://reactome.org/PathwayBrowser/#…	APICAL SURFACE;PROTEIN SECRETION	https://www.gsea-msigdb.org/gsea/msigdb/cards/HALLMARK_APICAL_SURFACE;https://www.gsea-msigdb.org/gsea/msigdb/cards/HALLMARK_PROTEIN_SECRETION
O14681	Etoposide-induced protein 2.4 homolog OS=Homo sapiens OX=9606 GN=EI24 PE=1 SV=4	EI24	0.883855	None	38.964	9.7	3	3	3	101890	90056	1.06165	0.938347	plasma membrane	K10134	EI24; etoposide-induced 2.4 mRNA	hsa04115 p53 signaling pathway	GO:0001558 regulation of cell growth; GO:0003008 system process; GO:0006914 autophagy; GO:0006915 apoptotic process; GO:0006950 response to stress; GO:0006974 cellular response to DNA damage stimulus; GO:0007154 cell communication; GO:0007165 signal transduction; GO:0008152 metabolic process; GO:0008219 cell death; GO:0008630 intrinsic apoptotic signaling pathway in response to DNA damage; GO:000…	GO:0005622 intracellular anatomical structure; GO:0005737 cytoplasm; GO:0005783 endoplasmic reticulum; GO:0005794 Golgi apparatus; GO:0005829 cytosol; GO:0012505 endomembrane system; GO:0043226 organelle; GO:0043227 membrane-bounded organelle; GO:0043229 intracellular organelle; GO:0043231 intracellular membrane-bounded organelle;				TV	KOG3966	p53-mediated apoptosis protein EI24/PIG8	WP3982 MIRNA REGULATION OF P53 PATHWAY IN PROSTATE CANCER	http://www.wikipathways.org/instance/WP3982_r108115				P53 PATHWAY	https://www.gsea-msigdb.org/gsea/msigdb/cards/HALLMARK_P53_PATHWAY
O14684	Prostaglandin E synthase OS=Homo sapiens OX=9606 GN=PTGES PE=1 SV=2	PTGES	0.537526	Down	17.102	29.6	3	3	3	1328400	714050	1.30079	0.699209	extracellular	K15729	PTGES; microsomal prostaglandin-E synthase 1 [EC:5.3.99.3]	hsa00590 Arachidonic acid metabolism; hsa01100 Metabolic pathways	GO:0001516 prostaglandin biosynthetic process; GO:0001676 long-chain fatty acid metabolic process; GO:0006082 organic acid metabolic process; GO:0006629 lipid metabolic process; GO:0006631 fatty acid metabolic process; GO:0006633 fatty acid biosynthetic process; GO:0006636 unsaturated fatty acid biosynthetic process; GO:0006690 icosanoid metabolic process; GO:0006692 prostanoid metabolic process;…	GO:0005622 intracellular anatomical structure; GO:0005634 nucleus; GO:0005635 nuclear envelope; GO:0005641 nuclear envelope lumen; GO:0005737 cytoplasm; GO:0005783 endoplasmic reticulum; GO:0005789 endoplasmic reticulum membrane; GO:0012505 endomembrane system; GO:0016020 membrane; GO:0016021 integral component of membrane; GO:0031224 intrinsic component of membrane; GO:0031967 organelle envelope…	GO:0003824 catalytic activity; GO:0004667 prostaglandin-D synthase activity; GO:0005488 binding; GO:0016853 isomerase activity; GO:0016860 intramolecular oxidoreductase activity; GO:0033218 amide binding; GO:0042277 peptide binding; GO:0043167 ion binding; GO:0043168 anion binding; GO:0043295 glutathione binding; GO:0050220 prostaglandin-E synthase activity; GO:0072341 modified amino acid binding…						WP4719 EICOSANOID METABOLISM VIA CYCLOOXYGENASES COX;WP167 EICOSANOID SYNTHESIS;WP5122 PROSTAGLANDIN AND LEUKOTRIENE METABOLISM IN SENESCENCE;WP5088 PROSTAGLANDIN SIGNALING;WP98 PROSTAGLANDIN SYNTHESIS AND REGULATION	http://www.wikipathways.org/instance/WP4719_r116307;http://www.wikipathways.org/instance/WP167_r120547;http://www.wikipathways.org/instance/WP5122_r119484;http://www.wikipathways.org/instance/WP5088_r119639;http://www.wikipathways.org/instance/WP98_r117172		R-HSA-1430728 Metabolism;R-HSA-2142753 Arachidonic acid metabolism;R-HSA-2162123 Synthesis of Prostaglandins (PG) and Thromboxanes (TX);R-HSA-556833 Metabolism of lipids;R-HSA-8978868 Fatty acid metabolism	https://reactome.org/PathwayBrowser/#/R-HSA-1430728;https://reactome.org/PathwayBrowser/#/R-HSA-2142753;https://reactome.org/PathwayBrowser/#/R-HSA-2162123;https://reactome.org/PathwayBrowser/#/R-HSA-556833;https://reactome.org/PathwayBrowser/#/R-HSA-8978868	ESTROGEN RESPONSE EARLY;ESTROGEN RESPONSE LATE;XENOBIOTIC METABOLISM	https://www.gsea-msigdb.org/gsea/msigdb/cards/HALLMARK_ESTROGEN_RESPONSE_EARLY;https://www.gsea-msigdb.org/gsea/msigdb/cards/HALLMARK_ESTROGEN_RESPONSE_LATE;https://www.gsea-msigdb.org/gsea/msigdb/cards/HALLMARK_XENOBIOTIC_METABOLISM
O14686	Histone-lysine N-methyltransferase 2D OS=Homo sapiens OX=9606 GN=KMT2D PE=1 SV=2	KMT2D	1.09888	None	593.38	0.6	2	2	2	35124	38597	0.95289	1.04711	nucleus	K09187	MLL2; [histone H3]-lysine4 N-trimethyltransferase MLL2 [EC:2.1.1.354]	hsa00310 Lysine degradation; hsa04934 Cushing syndrome; hsa01100 Metabolic pathways	GO:0000003 reproduction; GO:0001555 oocyte growth; GO:0001654 eye development; GO:0001701 in utero embryonic development; GO:0001745 compound eye morphogenesis; GO:0002009 morphogenesis of an epithelium; GO:0002165 instar larval or pupal development; GO:0002682 regulation of immune system process; GO:0003002 regionalization; GO:0003006 developmental process involved in reproduction; GO:0006325 ch…	GO:0005622 intracellular anatomical structure; GO:0005634 nucleus; GO:0005654 nucleoplasm; GO:0005667 transcription regulator complex; GO:0005694 chromosome; GO:0005700 polytene chromosome; GO:0005703 polytene chromosome puff; GO:0008230 ecdysone receptor holocomplex; GO:0031974 membrane-enclosed lumen; GO:0031981 nuclear lumen; GO:0032991 protein-containing complex; GO:0034708 methyltransferase …	GO:0000981 DNA-binding transcription factor activity, RNA polymerase II-specific; GO:0001067 transcription regulatory region nucleic acid binding; GO:0003676 nucleic acid binding; GO:0003677 DNA binding; GO:0003682 chromatin binding; GO:0003700 DNA-binding transcription factor activity; GO:0003712 transcription coregulator activity; GO:0003713 transcription coactivator activity; GO:0003824 cataly…	PF13771; PF00628; PF13832	PF13771 PHD-like zinc-binding domain; PF00628 PHD-finger; PF13832 PHD-zinc-finger like domain	R	KOG4443	Putative transcription factor HALR/MLL3, involved in embryonic development	WP4949 16P112 PROXIMAL DELETION SYNDROME;WP2369 HISTONE MODIFICATIONS	http://www.wikipathways.org/instance/WP4949_r115778;http://www.wikipathways.org/instance/WP2369_r118380	Transcription factor	R-HSA-1266738 Developmental Biology;R-HSA-162582 Signal Transduction;R-HSA-195721 Signaling by WNT;R-HSA-201681 TCF dependent signaling in response to WNT;R-HSA-201722 Formation of the beta-catenin:TCF transactivating complex;R-HSA-212436 Generic Transcription Pathway;R-HSA-3214841 PKMTs methylate histone lysines;R-HSA-3247509 Chromatin modifying enzymes;R-HSA-3769402 Deactivation of the beta-cat…	https://reactome.org/PathwayBrowser/#/R-HSA-1266738;https://reactome.org/PathwayBrowser/#/R-HSA-162582;https://reactome.org/PathwayBrowser/#/R-HSA-195721;https://reactome.org/PathwayBrowser/#/R-HSA-201681;https://reactome.org/PathwayBrowser/#/R-HSA-201722;https://reactome.org/PathwayBrowser/#/R-HSA-212436;https://reactome.org/PathwayBrowser/#/R-HSA-3214841;https://reactome.org/PathwayBrowser/#/R-…	KRAS SIGNALING DN	https://www.gsea-msigdb.org/gsea/msigdb/cards/HALLMARK_KRAS_SIGNALING_DN
O14727	Apoptotic protease-activating factor 1 OS=Homo sapiens OX=9606 GN=APAF1 PE=1 SV=2	APAF1		None	141.84	1.1	1	1	1	0	0			cytoplasm	K02084	APAF1; apoptotic protease-activating factor	hsa05160 Hepatitis C; hsa05161 Hepatitis B; hsa05200 Pathways in cancer; hsa05169 Epstein-Barr virus infection; hsa05012 Parkinson disease; hsa05010 Alzheimer disease; hsa05168 Herpes simplex virus 1 infection; hsa04210 Apoptosis; hsa05022 Pathways of neurodegeneration - multiple diseases; hsa04215 Apoptosis - multiple species; hsa05134 Legionellosis; hsa05152 Tuberculosis; hsa05162 Measles; hsa0…	GO:0001666 response to hypoxia; GO:0001775 cell activation; GO:0001838 embryonic epithelial tube formation; GO:0001841 neural tube formation; GO:0001843 neural tube closure; GO:0002009 morphogenesis of an epithelium; GO:0002252 immune effector process; GO:0002263 cell activation involved in immune response; GO:0002274 myeloid leukocyte activation; GO:0002275 myeloid cell activation involved in im…	GO:0005576 extracellular region; GO:0005622 intracellular anatomical structure; GO:0005634 nucleus; GO:0005737 cytoplasm; GO:0005829 cytosol; GO:0012505 endomembrane system; GO:0030141 secretory granule; GO:0031410 cytoplasmic vesicle; GO:0031974 membrane-enclosed lumen; GO:0031982 vesicle; GO:0031983 vesicle lumen; GO:0032991 protein-containing complex; GO:0034774 secretory granule lumen; GO:004…	GO:0000166 nucleotide binding; GO:0005488 binding; GO:0005515 protein binding; GO:0008047 enzyme activator activity; GO:0008656 cysteine-type endopeptidase activator activity involved in apoptotic process; GO:0016504 peptidase activator activity; GO:0016505 peptidase activator activity involved in apoptotic process; GO:0030234 enzyme regulator activity; GO:0031072 heat shock protein binding; GO:0…	PF00619; PF00931; PF17908	PF00619 Caspase recruitment domain; PF00931 NB-ARC domain; PF17908 APAF-1 helical domain	T	KOG4658	Apoptotic ATPase	WP5124 ALZHEIMERS DISEASE;WP2059 ALZHEIMERS DISEASE AND MIRNA EFFECTS;WP2447 AMYOTROPHIC LATERAL SCLEROSIS ALS;WP254 APOPTOSIS;WP1772 APOPTOSIS MODULATION AND SIGNALING;WP384 APOPTOSIS MODULATION BY HSP70;WP5090 COMPLEMENT SYSTEM IN NEURONAL DEVELOPMENT AND PLASTICITY;WP707 DNA DAMAGE RESPONSE;WP3959 DNA IRDOUBLE STRAND BREAKS AND CELLULAR RESPONSE VIA ATM;WP314 FAS LIGAND PATHWAY AND STRESS INDU…	http://www.wikipathways.org/instance/WP5124_r119432;http://www.wikipathways.org/instance/WP2059_r119468;http://www.wikipathways.org/instance/WP2447_r113794;http://www.wikipathways.org/instance/WP254_r118382;http://www.wikipathways.org/instance/WP1772_r120736;http://www.wikipathways.org/instance/WP384_r119819;http://www.wikipathways.org/instance/WP5090_r118898;http://www.wikipathways.org/instance/…		R-HSA-109581 Apoptosis;R-HSA-109606 Intrinsic Pathway for Apoptosis;R-HSA-111458 Formation of apoptosome;R-HSA-111459 Activation of caspases through apoptosome-mediated cleavage;R-HSA-111461 Cytochrome c-mediated apoptotic response;R-HSA-111463 SMAC (DIABLO) binds to IAPs ;R-HSA-111464 SMAC(DIABLO)-mediated dissociation of IAP:caspase complexes ;R-HSA-111469 SMAC, XIAP-regulated apoptotic respons…	https://reactome.org/PathwayBrowser/#/R-HSA-109581;https://reactome.org/PathwayBrowser/#/R-HSA-109606;https://reactome.org/PathwayBrowser/#/R-HSA-111458;https://reactome.org/PathwayBrowser/#/R-HSA-111459;https://reactome.org/PathwayBrowser/#/R-HSA-111461;https://reactome.org/PathwayBrowser/#/R-HSA-111463;https://reactome.org/PathwayBrowser/#/R-HSA-111464;https://reactome.org/PathwayBrowser/#/R-HS…	P53 PATHWAY	https://www.gsea-msigdb.org/gsea/msigdb/cards/HALLMARK_P53_PATHWAY
O14730	Serine/threonine-protein kinase RIO3 OS=Homo sapiens OX=9606 GN=RIOK3 PE=1 SV=2	RIOK3	0.634212	Down	59.092	9.8	4	3	4	64931	41180	1.22383	0.776168	cytoplasm	K08872			GO:0001817 regulation of cytokine production; GO:0001819 positive regulation of cytokine production; GO:0002682 regulation of immune system process; GO:0002683 negative regulation of immune system process; GO:0002684 positive regulation of immune system process; GO:0002697 regulation of immune effector process; GO:0002698 negative regulation of immune effector process; GO:0002831 regulation of re…	GO:0005622 intracellular anatomical structure; GO:0005634 nucleus; GO:0005737 cytoplasm; GO:0005829 cytosol; GO:0030684 preribosome; GO:0030688 preribosome, small subunit precursor; GO:0032991 protein-containing complex; GO:0043226 organelle; GO:0043227 membrane-bounded organelle; GO:0043229 intracellular organelle; GO:0043231 intracellular membrane-bounded organelle; GO:1990904 ribonucleoprotein…	GO:0002020 protease binding; GO:0003824 catalytic activity; GO:0004672 protein kinase activity; GO:0004674 protein serine/threonine kinase activity; GO:0005488 binding; GO:0005515 protein binding; GO:0016301 kinase activity; GO:0016740 transferase activity; GO:0016772 transferase activity, transferring phosphorus-containing groups; GO:0016773 phosphotransferase activity, alcohol group as acceptor…			T	KOG2269	Serine/threonine protein kinase	WP2849 HEMATOPOIETIC STEM CELL DIFFERENTIATION	http://www.wikipathways.org/instance/WP2849_r117150		R-HSA-6791226 Major pathway of rRNA processing in the nucleolus and cytosol;R-HSA-72312 rRNA processing;R-HSA-8868773 rRNA processing in the nucleus and cytosol;R-HSA-8953854 Metabolism of RNA	https://reactome.org/PathwayBrowser/#/R-HSA-6791226;https://reactome.org/PathwayBrowser/#/R-HSA-72312;https://reactome.org/PathwayBrowser/#/R-HSA-8868773;https://reactome.org/PathwayBrowser/#/R-HSA-8953854	ADIPOGENESIS;HEME METABOLISM	https://www.gsea-msigdb.org/gsea/msigdb/cards/HALLMARK_ADIPOGENESIS;https://www.gsea-msigdb.org/gsea/msigdb/cards/HALLMARK_HEME_METABOLISM
O14732	Inositol monophosphatase 2 OS=Homo sapiens OX=9606 GN=IMPA2 PE=1 SV=1	IMPA2	0.908786	None	31.321	46.5	8	8	8	886270	805430	1.04779	0.952214	cytoskeleton	K01092	E3.1.3.25; myo-inositol-1(or 4)-monophosphatase [EC:3.1.3.25]	hsa04070 Phosphatidylinositol signaling system; hsa00562 Inositol phosphate metabolism; hsa01100 Metabolic pathways	GO:0005975 carbohydrate metabolic process; GO:0006020 inositol metabolic process; GO:0006066 alcohol metabolic process; GO:0006629 lipid metabolic process; GO:0006644 phospholipid metabolic process; GO:0006650 glycerophospholipid metabolic process; GO:0006661 phosphatidylinositol biosynthetic process; GO:0006793 phosphorus metabolic process; GO:0006796 phosphate-containing compound metabolic proc…	GO:0005622 intracellular anatomical structure; GO:0005737 cytoplasm; GO:0005829 cytosol;	GO:0000287 magnesium ion binding; GO:0003824 catalytic activity; GO:0005488 binding; GO:0005515 protein binding; GO:0008934 inositol monophosphate 1-phosphatase activity; GO:0016787 hydrolase activity; GO:0016788 hydrolase activity, acting on ester bonds; GO:0016791 phosphatase activity; GO:0030145 manganese ion binding; GO:0031403 lithium ion binding; GO:0031420 alkali metal ion binding; GO:0042…			G	KOG2951	Inositol monophosphatase				R-HSA-1430728 Metabolism;R-HSA-1483249 Inositol phosphate metabolism;R-HSA-1855183 Synthesis of IP2, IP, and Ins in the cytosol	https://reactome.org/PathwayBrowser/#/R-HSA-1430728;https://reactome.org/PathwayBrowser/#/R-HSA-1483249;https://reactome.org/PathwayBrowser/#/R-HSA-1855183	ESTROGEN RESPONSE LATE	https://www.gsea-msigdb.org/gsea/msigdb/cards/HALLMARK_ESTROGEN_RESPONSE_LATE
O14733	Dual specificity mitogen-activated protein kinase kinase 7 OS=Homo sapiens OX=9606 GN=MAP2K7 PE=1 SV=2	MAP2K7	1.28923	None	47.484	11	4	4	4	49342	63613	0.873658	1.12634	cytoplasm	K04431	MAP2K7; mitogen-activated protein kinase kinase 7 [EC:2.7.12.2]	hsa04380 Osteoclast differentiation; hsa05208 Chemical carcinogenesis - reactive oxygen species; hsa05161 Hepatitis B; hsa05170 Human immunodeficiency virus 1 infection; hsa05169 Epstein-Barr virus infection; hsa05418 Fluid shear stress and atherosclerosis; hsa05010 Alzheimer disease; hsa05132 Salmonella infection; hsa05022 Pathways of neurodegeneration - multiple diseases; hsa04012 ErbB signalin…	GO:0000003 reproduction; GO:0000165 MAPK cascade; GO:0000280 nuclear division; GO:0000902 cell morphogenesis; GO:0000904 cell morphogenesis involved in differentiation; GO:0001558 regulation of cell growth; GO:0001667 ameboidal-type cell migration; GO:0001700 embryonic development via the syncytial blastoderm; GO:0001736 establishment of planar polarity; GO:0001738 morphogenesis of a polarized ep…	GO:0005622 intracellular anatomical structure; GO:0005634 nucleus; GO:0005737 cytoplasm; GO:0005829 cytosol; GO:0030424 axon; GO:0042995 cell projection; GO:0043005 neuron projection; GO:0043226 organelle; GO:0043227 membrane-bounded organelle; GO:0043229 intracellular organelle; GO:0043231 intracellular membrane-bounded organelle; GO:0120025 plasma membrane bounded cell projection;	GO:0000166 nucleotide binding; GO:0000287 magnesium ion binding; GO:0003824 catalytic activity; GO:0004672 protein kinase activity; GO:0004674 protein serine/threonine kinase activity; GO:0004707 MAP kinase activity; GO:0004708 MAP kinase kinase activity; GO:0004712 protein serine/threonine/tyrosine kinase activity; GO:0005078 MAP-kinase scaffold activity; GO:0005198 structural molecule activity;…	PF00069	PF00069 Protein kinase domain	T	KOG0983	Mitogen-activated protein kinase (MAPK) kinase MKK7/JNKK2	WP5124 ALZHEIMERS DISEASE;WP2059 ALZHEIMERS DISEASE AND MIRNA EFFECTS;WP3915 ANGIOPOIETINLIKE PROTEIN 8 REGULATORY PATHWAY;WP2795 CARDIAC HYPERTROPHIC RESPONSE;WP673 ERBB SIGNALING PATHWAY;WP3853 ERK PATHWAY IN HUNTINGTONS DISEASE;WP2261 GLIOBLASTOMA SIGNALING PATHWAYS;WP4666 HEPATITIS B INFECTION;WP4877 HOSTPATHOGEN INTERACTION OF HUMAN CORONAVIRUSES MAPK SIGNALING;WP4754 IL18 SIGNALING PATHWAY;…	http://www.wikipathways.org/instance/WP5124_r119432;http://www.wikipathways.org/instance/WP2059_r119468;http://www.wikipathways.org/instance/WP3915_r120659;http://www.wikipathways.org/instance/WP2795_r117670;http://www.wikipathways.org/instance/WP673_r118930;http://www.wikipathways.org/instance/WP3853_r120593;http://www.wikipathways.org/instance/WP2261_r118379;http://www.wikipathways.org/instance…		R-HSA-1280215 Cytokine Signaling in Immune system;R-HSA-1643685 Disease;R-HSA-166016 Toll Like Receptor 4 (TLR4) Cascade;R-HSA-166058 MyD88:MAL(TIRAP) cascade initiated on plasma membrane;R-HSA-166166 MyD88-independent TLR4 cascade ;R-HSA-168138 Toll Like Receptor 9 (TLR9) Cascade;R-HSA-168142 Toll Like Receptor 10 (TLR10) Cascade;R-HSA-168164 Toll Like Receptor 3 (TLR3) Cascade;R-HSA-168176 Toll…	https://reactome.org/PathwayBrowser/#/R-HSA-1280215;https://reactome.org/PathwayBrowser/#/R-HSA-1643685;https://reactome.org/PathwayBrowser/#/R-HSA-166016;https://reactome.org/PathwayBrowser/#/R-HSA-166058;https://reactome.org/PathwayBrowser/#/R-HSA-166166;https://reactome.org/PathwayBrowser/#/R-HSA-168138;https://reactome.org/PathwayBrowser/#/R-HSA-168142;https://reactome.org/PathwayBrowser/#/R-…
O14734	Acyl-coenzyme A thioesterase 8 OS=Homo sapiens OX=9606 GN=ACOT8 PE=1 SV=1	ACOT8		None	35.914	5	1	1	1	0	0			cytoplasm	K11992	ACOT8; acyl-CoA thioesterase 8 [EC:3.1.2.27]	hsa00120 Primary bile acid biosynthesis; hsa04146 Peroxisome; hsa01100 Metabolic pathways	GO:0001676 long-chain fatty acid metabolic process; GO:0006082 organic acid metabolic process; GO:0006139 nucleobase-containing compound metabolic process; GO:0006163 purine nucleotide metabolic process; GO:0006605 protein targeting; GO:0006625 protein targeting to peroxisome; GO:0006629 lipid metabolic process; GO:0006631 fatty acid metabolic process; GO:0006635 fatty acid beta-oxidation; GO:000…	GO:0005622 intracellular anatomical structure; GO:0005737 cytoplasm; GO:0005777 peroxisome; GO:0005782 peroxisomal matrix; GO:0005829 cytosol; GO:0031907 microbody lumen; GO:0031974 membrane-enclosed lumen; GO:0042579 microbody; GO:0043226 organelle; GO:0043227 membrane-bounded organelle; GO:0043229 intracellular organelle; GO:0043231 intracellular membrane-bounded organelle; GO:0043233 organelle…	GO:0003824 catalytic activity; GO:0003986 acetyl-CoA hydrolase activity; GO:0005102 signaling receptor binding; GO:0005488 binding; GO:0005515 protein binding; GO:0016289 CoA hydrolase activity; GO:0016290 palmitoyl-CoA hydrolase activity; GO:0016787 hydrolase activity; GO:0016788 hydrolase activity, acting on ester bonds; GO:0016790 thiolester hydrolase activity; GO:0047617 acyl-CoA hydrolase ac…			I	KOG3016	Acyl-CoA thioesterase	WP5064 7OXOC AND 7BETAHC PATHWAYS;WP4545 OXYSTEROLS DERIVED FROM CHOLESTEROL	http://www.wikipathways.org/instance/WP5064_r120384;http://www.wikipathways.org/instance/WP4545_r120411		R-HSA-1430728 Metabolism;R-HSA-192105 Synthesis of bile acids and bile salts;R-HSA-193368 Synthesis of bile acids and bile salts via 7alpha-hydroxycholesterol;R-HSA-194068 Bile acid and bile salt metabolism;R-HSA-2046104 alpha-linolenic (omega3) and linoleic (omega6) acid metabolism;R-HSA-2046106 alpha-linolenic acid (ALA) metabolism;R-HSA-389887 Beta-oxidation of pristanoyl-CoA;R-HSA-390247 Beta…	https://reactome.org/PathwayBrowser/#/R-HSA-1430728;https://reactome.org/PathwayBrowser/#/R-HSA-192105;https://reactome.org/PathwayBrowser/#/R-HSA-193368;https://reactome.org/PathwayBrowser/#/R-HSA-194068;https://reactome.org/PathwayBrowser/#/R-HSA-2046104;https://reactome.org/PathwayBrowser/#/R-HSA-2046106;https://reactome.org/PathwayBrowser/#/R-HSA-389887;https://reactome.org/PathwayBrowser/#/R…	FATTY ACID METABOLISM;PEROXISOME	https://www.gsea-msigdb.org/gsea/msigdb/cards/HALLMARK_FATTY_ACID_METABOLISM;https://www.gsea-msigdb.org/gsea/msigdb/cards/HALLMARK_PEROXISOME
O14735	CDP-diacylglycerol--inositol 3-phosphatidyltransferase OS=Homo sapiens OX=9606 GN=CDIPT PE=1 SV=1	CDIPT	0.796918	None	23.539	22.5	4	4	4	182340	145310	1.11302	0.886983	plasma membrane	K00999	CDIPT; CDP-diacylglycerol--inositol 3-phosphatidyltransferase [EC:2.7.8.11]	hsa04070 Phosphatidylinositol signaling system; hsa00562 Inositol phosphate metabolism; hsa00564 Glycerophospholipid metabolism; hsa01100 Metabolic pathways	GO:0006139 nucleobase-containing compound metabolic process; GO:0006220 pyrimidine nucleotide metabolic process; GO:0006629 lipid metabolic process; GO:0006644 phospholipid metabolic process; GO:0006650 glycerophospholipid metabolic process; GO:0006661 phosphatidylinositol biosynthetic process; GO:0006725 cellular aromatic compound metabolic process; GO:0006753 nucleoside phosphate metabolic proc…	GO:0000139 Golgi membrane; GO:0005622 intracellular anatomical structure; GO:0005737 cytoplasm; GO:0005783 endoplasmic reticulum; GO:0005789 endoplasmic reticulum membrane; GO:0005794 Golgi apparatus; GO:0005886 plasma membrane; GO:0012505 endomembrane system; GO:0016020 membrane; GO:0016021 integral component of membrane; GO:0031090 organelle membrane; GO:0031224 intrinsic component of membrane;…	GO:0003824 catalytic activity; GO:0003881 CDP-diacylglycerol-inositol 3-phosphatidyltransferase activity; GO:0005488 binding; GO:0008289 lipid binding; GO:0016740 transferase activity; GO:0016772 transferase activity, transferring phosphorus-containing groups; GO:0016780 phosphotransferase activity, for other substituted phosphate groups; GO:0017169 CDP-alcohol phosphatidyltransferase activity; G…			I	KOG3240	Phosphatidylinositol synthase	WP4949 16P112 PROXIMAL DELETION SYNDROME;WP4722 GLYCEROLIPIDS AND GLYCEROPHOSPHOLIPIDS;WP2533 GLYCEROPHOSPHOLIPID BIOSYNTHETIC PATHWAY	http://www.wikipathways.org/instance/WP4949_r115778;http://www.wikipathways.org/instance/WP4722_r117144;http://www.wikipathways.org/instance/WP2533_r120261		R-HSA-1430728 Metabolism;R-HSA-1483206 Glycerophospholipid biosynthesis;R-HSA-1483226 Synthesis of PI;R-HSA-1483257 Phospholipid metabolism;R-HSA-556833 Metabolism of lipids	https://reactome.org/PathwayBrowser/#/R-HSA-1430728;https://reactome.org/PathwayBrowser/#/R-HSA-1483206;https://reactome.org/PathwayBrowser/#/R-HSA-1483226;https://reactome.org/PathwayBrowser/#/R-HSA-1483257;https://reactome.org/PathwayBrowser/#/R-HSA-556833
O14737	Programmed cell death protein 5 OS=Homo sapiens OX=9606 GN=PDCD5 PE=1 SV=3	PDCD5	0.955137	None	14.285	47.2	5	5	5	795310	759630	1.02295	0.977054	cytoplasm	K06875			GO:0006915 apoptotic process; GO:0008219 cell death; GO:0008285 negative regulation of cell population proliferation; GO:0009719 response to endogenous stimulus; GO:0009893 positive regulation of metabolic process; GO:0009966 regulation of signal transduction; GO:0009967 positive regulation of signal transduction; GO:0009987 cellular process; GO:0010033 response to organic substance; GO:0010468 r…	GO:0005622 intracellular anatomical structure; GO:0005634 nucleus; GO:0005737 cytoplasm; GO:0005829 cytosol; GO:0043226 organelle; GO:0043227 membrane-bounded organelle; GO:0043229 intracellular organelle; GO:0043231 intracellular membrane-bounded organelle;	GO:0005488 binding; GO:0005515 protein binding; GO:0005539 glycosaminoglycan binding; GO:0008047 enzyme activator activity; GO:0008092 cytoskeletal protein binding; GO:0008201 heparin binding; GO:0010698 acetyltransferase activator activity; GO:0015631 tubulin binding; GO:0030234 enzyme regulator activity; GO:0043167 ion binding; GO:0043168 anion binding; GO:0048487 beta-tubulin binding; GO:00973…			D	KOG3431	Apoptosis-related protein/predicted DNA-binding protein
O14744	Protein arginine N-methyltransferase 5 OS=Homo sapiens OX=9606 GN=PRMT5 PE=1 SV=4	PRMT5	1.01238	None	72.683	40.7	18	18	18	509550	515860	0.993846	1.00615	cytoplasm	K02516			GO:0000003 reproduction; GO:0000122 negative regulation of transcription by RNA polymerase II; GO:0000375 RNA splicing, via transesterification reactions; GO:0000377 RNA splicing, via transesterification reactions with bulged adenosine as nucleophile; GO:0000387 spliceosomal snRNP assembly; GO:0000398 mRNA splicing, via spliceosome; GO:0000578 embryonic axis specification; GO:0001775 cell activat…	GO:0005622 intracellular anatomical structure; GO:0005634 nucleus; GO:0005654 nucleoplasm; GO:0005737 cytoplasm; GO:0005794 Golgi apparatus; GO:0005829 cytosol; GO:0012505 endomembrane system; GO:0031974 membrane-enclosed lumen; GO:0031981 nuclear lumen; GO:0032991 protein-containing complex; GO:0034708 methyltransferase complex; GO:0034709 methylosome; GO:0035097 histone methyltransferase comple…	GO:0000166 nucleotide binding; GO:0000976 transcription cis-regulatory region binding; GO:0000977 RNA polymerase II transcription regulatory region sequence-specific DNA binding; GO:0000978 RNA polymerase II cis-regulatory region sequence-specific DNA binding; GO:0000987 cis-regulatory region sequence-specific DNA binding; GO:0001067 transcription regulatory region nucleic acid binding; GO:000203…	PF17285; PF05185; PF17286	PF17285 PRMT5 TIM barrel domain; PF05185 PRMT5 arginine-N-methyltransferase; PF17286 PRMT5 oligomerisation domain	D	KOG0822	Protein kinase inhibitor	WP3594 CIRCADIAN RHYTHM GENES;WP4947 NITRIC OXIDE METABOLISM IN CYSTIC FIBROSIS;WP4533 TRANSCRIPTION COFACTORS SKI AND SKIL PROTEIN PARTNERS	http://www.wikipathways.org/instance/WP3594_r117682;http://www.wikipathways.org/instance/WP4947_r118070;http://www.wikipathways.org/instance/WP4533_r103380	Transcription factor	R-HSA-191859 snRNP Assembly;R-HSA-194441 Metabolism of non-coding RNA;R-HSA-212436 Generic Transcription Pathway;R-HSA-3214858 RMTs methylate histone arginines;R-HSA-3247509 Chromatin modifying enzymes;R-HSA-3700989 Transcriptional Regulation by TP53;R-HSA-4839726 Chromatin organization;R-HSA-5633007 Regulation of TP53 Activity;R-HSA-6804760 Regulation of TP53 Activity through Methylation;R-HSA-7…	https://reactome.org/PathwayBrowser/#/R-HSA-191859;https://reactome.org/PathwayBrowser/#/R-HSA-194441;https://reactome.org/PathwayBrowser/#/R-HSA-212436;https://reactome.org/PathwayBrowser/#/R-HSA-3214858;https://reactome.org/PathwayBrowser/#/R-HSA-3247509;https://reactome.org/PathwayBrowser/#/R-HSA-3700989;https://reactome.org/PathwayBrowser/#/R-HSA-4839726;https://reactome.org/PathwayBrowser/#/…	G2M CHECKPOINT	https://www.gsea-msigdb.org/gsea/msigdb/cards/HALLMARK_G2M_CHECKPOINT
O14745	Na(+)/H(+) exchange regulatory cofactor NHE-RF1 OS=Homo sapiens OX=9606 GN=SLC9A3R1 PE=1 SV=4	SLC9A3R1	0.981468	None	38.868	42.5	13	13	13	1694400	1663000	1.00935	0.990648	nucleus	K13365	SLC9A3R1; sodium/hydrogen exchange regulatory cofactor NHE-RF1	hsa05165 Human papillomavirus infection; hsa05130 Pathogenic Escherichia coli infection; hsa04928 Parathyroid hormone synthesis, secretion and action; hsa04530 Tight junction	GO:0000902 cell morphogenesis; GO:0000904 cell morphogenesis involved in differentiation; GO:0001738 morphogenesis of a polarized epithelium; GO:0001932 regulation of protein phosphorylation; GO:0001933 negative regulation of protein phosphorylation; GO:0002009 morphogenesis of an epithelium; GO:0002028 regulation of sodium ion transport; GO:0002064 epithelial cell development; GO:0002065 columna…	GO:0001726 ruffle; GO:0005622 intracellular anatomical structure; GO:0005737 cytoplasm; GO:0005856 cytoskeleton; GO:0005886 plasma membrane; GO:0005902 microvillus; GO:0005903 brush border; GO:0005929 cilium; GO:0012505 endomembrane system; GO:0015629 actin cytoskeleton; GO:0016020 membrane; GO:0016324 apical plasma membrane; GO:0030175 filopodium; GO:0031252 cell leading edge; GO:0031253 cell pr…	GO:0001664 G protein-coupled receptor binding; GO:0005102 signaling receptor binding; GO:0005198 structural molecule activity; GO:0005488 binding; GO:0005515 protein binding; GO:0008013 beta-catenin binding; GO:0008092 cytoskeletal protein binding; GO:0016247 channel regulator activity; GO:0017022 myosin binding; GO:0017081 chloride channel regulator activity; GO:0019899 enzyme binding; GO:001990…	PF00595; PF09007	PF00595 PDZ domain; PF09007 EBP50, C-terminal	S	KOG3528	FOG: PDZ domain						ESTROGEN RESPONSE EARLY;ESTROGEN RESPONSE LATE;MTORC1 SIGNALING	https://www.gsea-msigdb.org/gsea/msigdb/cards/HALLMARK_ESTROGEN_RESPONSE_EARLY;https://www.gsea-msigdb.org/gsea/msigdb/cards/HALLMARK_ESTROGEN_RESPONSE_LATE;https://www.gsea-msigdb.org/gsea/msigdb/cards/HALLMARK_MTORC1_SIGNALING
O14757	Serine/threonine-protein kinase Chk1 OS=Homo sapiens OX=9606 GN=CHEK1 PE=1 SV=2	CHEK1	1.26062	None	54.433	17.4	6	6	6	76613	96580	0.884712	1.11529	cytoplasm	K02216	CHEK1; serine/threonine-protein kinase CHEK1 [EC:2.7.11.1]	hsa04110 Cell cycle; hsa04115 p53 signaling pathway; hsa04218 Cellular senescence; hsa05170 Human immunodeficiency virus 1 infection; hsa05203 Viral carcinogenesis; hsa05166 Human T-cell leukemia virus 1 infection	GO:0000018 regulation of DNA recombination; GO:0000075 cell cycle checkpoint signaling; GO:0000076 DNA replication checkpoint signaling; GO:0000077 DNA damage checkpoint signaling; GO:0000086 G2/M transition of mitotic cell cycle; GO:0000226 microtubule cytoskeleton organization; GO:0000278 mitotic cell cycle; GO:0000724 double-strand break repair via homologous recombination; GO:0000725 recombin…	GO:0000228 nuclear chromosome; GO:0000785 chromatin; GO:0000793 condensed chromosome; GO:0000794 condensed nuclear chromosome; GO:0005622 intracellular anatomical structure; GO:0005634 nucleus; GO:0005654 nucleoplasm; GO:0005657 replication fork; GO:0005694 chromosome; GO:0005737 cytoplasm; GO:0005813 centrosome; GO:0005815 microtubule organizing center; GO:0005829 cytosol; GO:0005856 cytoskeleto…	GO:0003824 catalytic activity; GO:0004672 protein kinase activity; GO:0004674 protein serine/threonine kinase activity; GO:0005488 binding; GO:0005515 protein binding; GO:0016301 kinase activity; GO:0016740 transferase activity; GO:0016772 transferase activity, transferring phosphorus-containing groups; GO:0016773 phosphotransferase activity, alcohol group as acceptor; GO:0019904 protein domain s…	PF00069	PF00069 Protein kinase domain	D	KOG0590	Checkpoint kinase and related serine/threonine protein kinases	WP3878 ATM SIGNALING IN DEVELOPMENT AND DISEASE;WP2516 ATM SIGNALING PATHWAY;WP3875 ATR SIGNALING;WP179 CELL CYCLE;WP707 DNA DAMAGE RESPONSE;WP4016 DNA IRDAMAGE AND CELLULAR RESPONSE VIA ATR;WP3959 DNA IRDOUBLE STRAND BREAKS AND CELLULAR RESPONSE VIA ATM;WP4946 DNA REPAIR PATHWAYS FULL NETWORK;WP1971 INTEGRATED CANCER PATHWAY;WP1530 MIRNA REGULATION OF DNA DAMAGE RESPONSE;WP3651 PATHWAYS AFFECTED…	http://www.wikipathways.org/instance/WP3878_r117656;http://www.wikipathways.org/instance/WP2516_r116808;http://www.wikipathways.org/instance/WP3875_r117657;http://www.wikipathways.org/instance/WP179_r120742;http://www.wikipathways.org/instance/WP707_r116541;http://www.wikipathways.org/instance/WP4016_r120667;http://www.wikipathways.org/instance/WP3959_r118468;http://www.wikipathways.org/instance/…		R-HSA-1433557 Signaling by SCF-KIT;R-HSA-162582 Signal Transduction;R-HSA-1640170 Cell Cycle;R-HSA-176187 Activation of ATR in response to replication stress;R-HSA-212436 Generic Transcription Pathway;R-HSA-3700989 Transcriptional Regulation by TP53;R-HSA-5633007 Regulation of TP53 Activity;R-HSA-5685942 HDR through Homologous Recombination (HRR);R-HSA-5693532 DNA Double-Strand Break Repair;R-HSA…	https://reactome.org/PathwayBrowser/#/R-HSA-1433557;https://reactome.org/PathwayBrowser/#/R-HSA-162582;https://reactome.org/PathwayBrowser/#/R-HSA-1640170;https://reactome.org/PathwayBrowser/#/R-HSA-176187;https://reactome.org/PathwayBrowser/#/R-HSA-212436;https://reactome.org/PathwayBrowser/#/R-HSA-3700989;https://reactome.org/PathwayBrowser/#/R-HSA-5633007;https://reactome.org/PathwayBrowser/#/…	E2F TARGETS;G2M CHECKPOINT	https://www.gsea-msigdb.org/gsea/msigdb/cards/HALLMARK_E2F_TARGETS;https://www.gsea-msigdb.org/gsea/msigdb/cards/HALLMARK_G2M_CHECKPOINT
O14763	Tumor necrosis factor receptor superfamily member 10B OS=Homo sapiens OX=9606 GN=TNFRSF10B PE=1 SV=2	TNFRSF10B		None	47.878	3.9	1	1	1	0	0			plasma membrane	K04722	TNFRSF10A_B; tumor necrosis factor receptor superfamily member 10A/B	hsa04115 p53 signaling pathway; hsa04650 Natural killer cell mediated cytotoxicity; hsa05164 Influenza A; hsa05132 Salmonella infection; hsa05130 Pathogenic Escherichia coli infection; hsa04060 Cytokine-cytokine receptor interaction; hsa04210 Apoptosis; hsa04061 Viral protein interaction with cytokine and cytokine receptor; hsa05417 Lipid and atherosclerosis; hsa04217 Necroptosis	GO:0001932 regulation of protein phosphorylation; GO:0001934 positive regulation of protein phosphorylation; GO:0002237 response to molecule of bacterial origin; GO:0002376 immune system process; GO:0006915 apoptotic process; GO:0006919 activation of cysteine-type endopeptidase activity involved in apoptotic process; GO:0006928 movement of cell or subcellular component; GO:0006950 response to str…	GO:0005886 plasma membrane; GO:0005887 integral component of plasma membrane; GO:0009986 cell surface; GO:0016020 membrane; GO:0016021 integral component of membrane; GO:0031224 intrinsic component of membrane; GO:0031226 intrinsic component of plasma membrane; GO:0071944 cell periphery;	GO:0002020 protease binding; GO:0004888 transmembrane signaling receptor activity; GO:0005031 tumor necrosis factor-activated receptor activity; GO:0005035 death receptor activity; GO:0005488 binding; GO:0005515 protein binding; GO:0008134 transcription factor binding; GO:0019899 enzyme binding; GO:0038023 signaling receptor activity; GO:0045569 TRAIL binding; GO:0060089 molecular transducer acti…	PF00020; PF00531	PF00020 TNFR/NGFR cysteine-rich region; PF00531 Death domain				WP254 APOPTOSIS;WP1772 APOPTOSIS MODULATION AND SIGNALING;WP2864 APOPTOSISRELATED NETWORK DUE TO ALTERED NOTCH3 IN OVARIAN CANCER;WP707 DNA DAMAGE RESPONSE;WP1530 MIRNA REGULATION OF DNA DAMAGE RESPONSE;WP3982 MIRNA REGULATION OF P53 PATHWAY IN PROSTATE CANCER;WP4925 UNFOLDED PROTEIN RESPONSE	http://www.wikipathways.org/instance/WP254_r118382;http://www.wikipathways.org/instance/WP1772_r120736;http://www.wikipathways.org/instance/WP2864_r108133;http://www.wikipathways.org/instance/WP707_r116541;http://www.wikipathways.org/instance/WP1530_r118120;http://www.wikipathways.org/instance/WP3982_r108115;http://www.wikipathways.org/instance/WP4925_r112845		R-HSA-109581 Apoptosis;R-HSA-109582 Hemostasis;R-HSA-140534 Caspase activation via Death Receptors in the presence of ligand;R-HSA-162582 Signal Transduction;R-HSA-202733 Cell surface interactions at the vascular wall;R-HSA-212436 Generic Transcription Pathway;R-HSA-3371378 Regulation by c-FLIP;R-HSA-3700989 Transcriptional Regulation by TP53;R-HSA-5213460 RIPK1-mediated regulated necrosis;R-HSA-…	https://reactome.org/PathwayBrowser/#/R-HSA-109581;https://reactome.org/PathwayBrowser/#/R-HSA-109582;https://reactome.org/PathwayBrowser/#/R-HSA-140534;https://reactome.org/PathwayBrowser/#/R-HSA-162582;https://reactome.org/PathwayBrowser/#/R-HSA-202733;https://reactome.org/PathwayBrowser/#/R-HSA-212436;https://reactome.org/PathwayBrowser/#/R-HSA-3371378;https://reactome.org/PathwayBrowser/#/R-H…
O14773	Tripeptidyl-peptidase 1 OS=Homo sapiens OX=9606 GN=TPP1 PE=1 SV=2	TPP1	0.959964	None	61.247	14.7	5	5	5	235540	226110	1.02043	0.979573	extracellular	K01279	TPP1; tripeptidyl-peptidase I [EC:3.4.14.9]	hsa04142 Lysosome	GO:0001894 tissue homeostasis; GO:0003008 system process; GO:0006508 proteolysis; GO:0006518 peptide metabolic process; GO:0006629 lipid metabolic process; GO:0006807 nitrogen compound metabolic process; GO:0006950 response to stress; GO:0006986 response to unfolded protein; GO:0006996 organelle organization; GO:0007033 vacuole organization; GO:0007040 lysosome organization; GO:0007154 cell commu…	GO:0000323 lytic vacuole; GO:0005622 intracellular anatomical structure; GO:0005737 cytoplasm; GO:0005764 lysosome; GO:0005773 vacuole; GO:0005775 vacuolar lumen; GO:0031974 membrane-enclosed lumen; GO:0043202 lysosomal lumen; GO:0043226 organelle; GO:0043227 membrane-bounded organelle; GO:0043229 intracellular organelle; GO:0043231 intracellular membrane-bounded organelle; GO:0043233 organelle l…	GO:0003824 catalytic activity; GO:0004175 endopeptidase activity; GO:0005488 binding; GO:0008233 peptidase activity; GO:0008236 serine-type peptidase activity; GO:0008238 exopeptidase activity; GO:0008240 tripeptidyl-peptidase activity; GO:0016787 hydrolase activity; GO:0017171 serine hydrolase activity; GO:0033218 amide binding; GO:0042277 peptide binding; GO:0140096 catalytic activity, acting o…	PF09286; PF00082	PF09286 Pro-kumamolisin, activation domain ; PF00082 Subtilase family				WP3888 VEGFAVEGFR2 SIGNALING PATHWAY	http://www.wikipathways.org/instance/WP3888_r116782		R-HSA-2262752 Cellular responses to stress;R-HSA-381038 XBP1(S) activates chaperone genes;R-HSA-381070 IRE1alpha activates chaperones;R-HSA-381119 Unfolded Protein Response (UPR);R-HSA-8953897 Cellular responses to stimuli	https://reactome.org/PathwayBrowser/#/R-HSA-2262752;https://reactome.org/PathwayBrowser/#/R-HSA-381038;https://reactome.org/PathwayBrowser/#/R-HSA-381070;https://reactome.org/PathwayBrowser/#/R-HSA-381119;https://reactome.org/PathwayBrowser/#/R-HSA-8953897
O14776	Transcription elongation regulator 1 OS=Homo sapiens OX=9606 GN=TCERG1 PE=1 SV=2	TCERG1	0.962146	None	123.9	26.7	28	28	28	831870	800380	1.01929	0.980708	nucleus	K12824	TCERG1; transcription elongation regulator 1	hsa03040 Spliceosome	GO:0000122 negative regulation of transcription by RNA polymerase II; GO:0000375 RNA splicing, via transesterification reactions; GO:0000377 RNA splicing, via transesterification reactions with bulged adenosine as nucleophile; GO:0000398 mRNA splicing, via spliceosome; GO:0006139 nucleobase-containing compound metabolic process; GO:0006351 transcription, DNA-templated; GO:0006355 regulation of tr…	GO:0005622 intracellular anatomical structure; GO:0005634 nucleus; GO:0005654 nucleoplasm; GO:0031974 membrane-enclosed lumen; GO:0031981 nuclear lumen; GO:0034399 nuclear periphery; GO:0043226 organelle; GO:0043227 membrane-bounded organelle; GO:0043229 intracellular organelle; GO:0043231 intracellular membrane-bounded organelle; GO:0043233 organelle lumen; GO:0070013 intracellular organelle lum…	GO:0003700 DNA-binding transcription factor activity; GO:0003712 transcription coregulator activity; GO:0003713 transcription coactivator activity; GO:0003714 transcription corepressor activity; GO:0005488 binding; GO:0005515 protein binding; GO:0008134 transcription factor binding; GO:0042802 identical protein binding; GO:0070064 proline-rich region binding; GO:0140110 transcription regulator ac…	PF00397	PF00397 WW domain	K	KOG0155	Transcription factor CA150
O14777	Kinetochore protein NDC80 homolog OS=Homo sapiens OX=9606 GN=NDC80 PE=1 SV=1	NDC80	1.10974	None	73.912	6.5	4	4	4	79878	88644	0.947983	1.05202	mitochondria	K11547			GO:0000003 reproduction; GO:0000070 mitotic sister chromatid segregation; GO:0000132 establishment of mitotic spindle orientation; GO:0000226 microtubule cytoskeleton organization; GO:0000278 mitotic cell cycle; GO:0000280 nuclear division; GO:0000819 sister chromatid segregation; GO:0003006 developmental process involved in reproduction; GO:0006928 movement of cell or subcellular component; GO:0…	GO:0000228 nuclear chromosome; GO:0000775 chromosome, centromeric region; GO:0000776 kinetochore; GO:0000779 condensed chromosome, centromeric region; GO:0000793 condensed chromosome; GO:0000794 condensed nuclear chromosome; GO:0000940 outer kinetochore; GO:0005622 intracellular anatomical structure; GO:0005634 nucleus; GO:0005654 nucleoplasm; GO:0005694 chromosome; GO:0005737 cytoplasm; GO:00058…	GO:0005198 structural molecule activity; GO:0005200 structural constituent of cytoskeleton; GO:0005488 binding; GO:0005515 protein binding; GO:0019904 protein domain specific binding; GO:0042802 identical protein binding;	PF18077	PF18077 Domain of unknown function (DUF5595)	D	KOG0995	Centromere-associated protein HEC1				R-HSA-141424 Amplification of signal from the kinetochores;R-HSA-141444 Amplification of signal from unattached kinetochores via a MAD2 inhibitory signal;R-HSA-162582 Signal Transduction;R-HSA-1640170 Cell Cycle;R-HSA-194315 Signaling by Rho GTPases;R-HSA-195258 RHO GTPase Effectors;R-HSA-2467813 Separation of Sister Chromatids;R-HSA-2500257 Resolution of Sister Chromatid Cohesion;R-HSA-2555396 M…	https://reactome.org/PathwayBrowser/#/R-HSA-141424;https://reactome.org/PathwayBrowser/#/R-HSA-141444;https://reactome.org/PathwayBrowser/#/R-HSA-162582;https://reactome.org/PathwayBrowser/#/R-HSA-1640170;https://reactome.org/PathwayBrowser/#/R-HSA-194315;https://reactome.org/PathwayBrowser/#/R-HSA-195258;https://reactome.org/PathwayBrowser/#/R-HSA-2467813;https://reactome.org/PathwayBrowser/#/R-…	G2M CHECKPOINT;MITOTIC SPINDLE	https://www.gsea-msigdb.org/gsea/msigdb/cards/HALLMARK_G2M_CHECKPOINT;https://www.gsea-msigdb.org/gsea/msigdb/cards/HALLMARK_MITOTIC_SPINDLE
O14787	Transportin-2 OS=Homo sapiens OX=9606 GN=TNPO2 PE=1 SV=3	TNPO2	1.00831	None	101.39	17.3	12	7	7	205750	207460	0.995862	1.00414	cytoplasm	K18727	TNPO2; transportin-2	hsa03013 Nucleocytoplasmic transport	GO:0002164 larval development; GO:0002376 immune system process; GO:0002520 immune system development; GO:0006606 protein import into nucleus; GO:0006607 NLS-bearing protein import into nucleus; GO:0006610 ribosomal protein import into nucleus; GO:0006810 transport; GO:0006886 intracellular protein transport; GO:0006913 nucleocytoplasmic transport; GO:0007275 multicellular organism development; G…	GO:0005622 intracellular anatomical structure; GO:0005634 nucleus; GO:0005635 nuclear envelope; GO:0005737 cytoplasm; GO:0005829 cytosol; GO:0012505 endomembrane system; GO:0016020 membrane; GO:0031090 organelle membrane; GO:0031965 nuclear membrane; GO:0031967 organelle envelope; GO:0031974 membrane-enclosed lumen; GO:0031975 envelope; GO:0031981 nuclear lumen; GO:0034399 nuclear periphery; GO:0…	GO:0005048 signal sequence binding; GO:0005215 transporter activity; GO:0005488 binding; GO:0008139 nuclear localization sequence binding; GO:0033218 amide binding; GO:0042277 peptide binding;			YU	KOG2023	Nuclear transport receptor Karyopherin-beta2/Transportin (importin beta superfamily)						G2M CHECKPOINT	https://www.gsea-msigdb.org/gsea/msigdb/cards/HALLMARK_G2M_CHECKPOINT
O14798	Tumor necrosis factor receptor superfamily member 10C OS=Homo sapiens OX=9606 GN=TNFRSF10C PE=1 SV=3	TNFRSF10C		None	27.407	5.8	1	1	1	0	0			extracellular	K22701	TNFRSF10C; tumor necrosis factor receptor superfamily member 10C	hsa04060 Cytokine-cytokine receptor interaction; hsa04061 Viral protein interaction with cytokine and cytokine receptor	GO:0001932 regulation of protein phosphorylation; GO:0001934 positive regulation of protein phosphorylation; GO:0002237 response to molecule of bacterial origin; GO:0002376 immune system process; GO:0006915 apoptotic process; GO:0006919 activation of cysteine-type endopeptidase activity involved in apoptotic process; GO:0006928 movement of cell or subcellular component; GO:0006950 response to str…	GO:0005886 plasma membrane; GO:0005887 integral component of plasma membrane; GO:0009986 cell surface; GO:0016020 membrane; GO:0016021 integral component of membrane; GO:0031224 intrinsic component of membrane; GO:0031226 intrinsic component of plasma membrane; GO:0071944 cell periphery;	GO:0002020 protease binding; GO:0004888 transmembrane signaling receptor activity; GO:0005031 tumor necrosis factor-activated receptor activity; GO:0005035 death receptor activity; GO:0005488 binding; GO:0005515 protein binding; GO:0008134 transcription factor binding; GO:0019899 enzyme binding; GO:0038023 signaling receptor activity; GO:0045569 TRAIL binding; GO:0060089 molecular transducer acti…	PF00020	PF00020 TNFR/NGFR cysteine-rich region				WP1772 APOPTOSIS MODULATION AND SIGNALING;WP3888 VEGFAVEGFR2 SIGNALING PATHWAY	http://www.wikipathways.org/instance/WP1772_r120736;http://www.wikipathways.org/instance/WP3888_r116782		R-HSA-212436 Generic Transcription Pathway;R-HSA-3700989 Transcriptional Regulation by TP53;R-HSA-5633008 TP53 Regulates Transcription of Cell Death Genes;R-HSA-6803211 TP53 Regulates Transcription of Death Receptors and Ligands;R-HSA-73857 RNA Polymerase II Transcription;R-HSA-74160 Gene expression (Transcription)	https://reactome.org/PathwayBrowser/#/R-HSA-212436;https://reactome.org/PathwayBrowser/#/R-HSA-3700989;https://reactome.org/PathwayBrowser/#/R-HSA-5633008;https://reactome.org/PathwayBrowser/#/R-HSA-6803211;https://reactome.org/PathwayBrowser/#/R-HSA-73857;https://reactome.org/PathwayBrowser/#/R-HSA-74160
O14802	DNA-directed RNA polymerase III subunit RPC1 OS=Homo sapiens OX=9606 GN=POLR3A PE=1 SV=2	POLR3A	0.973502	None	155.64	11.4	11	11	11	87779	85453	1.01343	0.986573	cytoplasm	K03018	RPC1; DNA-directed RNA polymerase III subunit RPC1 [EC:2.7.7.6]	hsa04623 Cytosolic DNA-sensing pathway; hsa03020 RNA polymerase	GO:0001817 regulation of cytokine production; GO:0001819 positive regulation of cytokine production; GO:0002376 immune system process; GO:0006139 nucleobase-containing compound metabolic process; GO:0006351 transcription, DNA-templated; GO:0006725 cellular aromatic compound metabolic process; GO:0006807 nitrogen compound metabolic process; GO:0006950 response to stress; GO:0006952 defense respons…	GO:0000428 DNA-directed RNA polymerase complex; GO:0005622 intracellular anatomical structure; GO:0005634 nucleus; GO:0005654 nucleoplasm; GO:0005666 RNA polymerase III complex; GO:0005737 cytoplasm; GO:0005829 cytosol; GO:0030880 RNA polymerase complex; GO:0031974 membrane-enclosed lumen; GO:0031981 nuclear lumen; GO:0032991 protein-containing complex; GO:0043226 organelle; GO:0043227 membrane-b…	GO:0003824 catalytic activity; GO:0003899 DNA-directed 5'-3' RNA polymerase activity; GO:0016740 transferase activity; GO:0016772 transferase activity, transferring phosphorus-containing groups; GO:0016779 nucleotidyltransferase activity; GO:0034062 5'-3' RNA polymerase activity; GO:0097747 RNA polymerase activity; GO:0140098 catalytic activity, acting on RNA;	PF04997; PF00623; PF04983; PF05000; PF04998	PF04997 RNA polymerase Rpb1, domain 1; PF00623 RNA polymerase Rpb1, domain 2; PF04983 RNA polymerase Rpb1, domain 3; PF05000 RNA polymerase Rpb1, domain 4; PF04998 RNA polymerase Rpb1, domain 5	K	KOG0261	RNA polymerase III, large subunit	WP4655 CYTOSOLIC DNASENSING PATHWAY;WP4022 PYRIMIDINE METABOLISM	http://www.wikipathways.org/instance/WP4655_r105163;http://www.wikipathways.org/instance/WP4022_r120306		R-HSA-168249 Innate Immune System;R-HSA-168256 Immune System;R-HSA-1834949 Cytosolic sensors of pathogen-associated DNA ;R-HSA-73780 RNA Polymerase III Chain Elongation;R-HSA-73980 RNA Polymerase III Transcription Termination;R-HSA-74158 RNA Polymerase III Transcription;R-HSA-74160 Gene expression (Transcription);R-HSA-749476 RNA Polymerase III Abortive And Retractive Initiation;R-HSA-76046 RNA P…	https://reactome.org/PathwayBrowser/#/R-HSA-168249;https://reactome.org/PathwayBrowser/#/R-HSA-168256;https://reactome.org/PathwayBrowser/#/R-HSA-1834949;https://reactome.org/PathwayBrowser/#/R-HSA-73780;https://reactome.org/PathwayBrowser/#/R-HSA-73980;https://reactome.org/PathwayBrowser/#/R-HSA-74158;https://reactome.org/PathwayBrowser/#/R-HSA-74160;https://reactome.org/PathwayBrowser/#/R-HSA-7…
O14818	Proteasome subunit alpha type-7 OS=Homo sapiens OX=9606 GN=PSMA7 PE=1 SV=1	PSMA7	1.00546	None	27.887	63.7	14	14	14	2673000	2687600	0.997276	1.00272	cytoplasm	K02731	PSMA7; 20S proteasome subunit alpha 4 [EC:3.4.25.1]	hsa05017 Spinocerebellar ataxia; hsa05016 Huntington disease; hsa03050 Proteasome; hsa05012 Parkinson disease; hsa05010 Alzheimer disease; hsa05022 Pathways of neurodegeneration - multiple diseases; hsa05014 Amyotrophic lateral sclerosis; hsa05020 Prion disease	GO:0006464 cellular protein modification process; GO:0006508 proteolysis; GO:0006511 ubiquitin-dependent protein catabolic process; GO:0006807 nitrogen compound metabolic process; GO:0008152 metabolic process; GO:0009056 catabolic process; GO:0009057 macromolecule catabolic process; GO:0009987 cellular process; GO:0010498 proteasomal protein catabolic process; GO:0016579 protein deubiquitination;…	GO:0000502 proteasome complex; GO:0005622 intracellular anatomical structure; GO:0005634 nucleus; GO:0005654 nucleoplasm; GO:0005737 cytoplasm; GO:0005829 cytosol; GO:0005839 proteasome core complex; GO:0019773 proteasome core complex, alpha-subunit complex; GO:0031974 membrane-enclosed lumen; GO:0031981 nuclear lumen; GO:0032991 protein-containing complex; GO:0043226 organelle; GO:0043227 membra…	GO:0005488 binding; GO:0005515 protein binding; GO:0042802 identical protein binding;	PF00227	PF00227 Proteasome subunit	O	KOG0183	20S proteasome, regulatory subunit alpha type PSMA7/PRE6	WP5124 ALZHEIMERS DISEASE;WP2059 ALZHEIMERS DISEASE AND MIRNA EFFECTS;WP183 PROTEASOME DEGRADATION	http://www.wikipathways.org/instance/WP5124_r119432;http://www.wikipathways.org/instance/WP2059_r119468;http://www.wikipathways.org/instance/WP183_r117060		R-HSA-109581 Apoptosis;R-HSA-1168372 Downstream signaling events of B Cell Receptor (BCR);R-HSA-1169091 Activation of NF-kappaB in B cells;R-HSA-1234174 Cellular response to hypoxia;R-HSA-1234176 Oxygen-dependent proline hydroxylation of Hypoxia-inducible Factor Alpha;R-HSA-1236974 ER-Phagosome pathway;R-HSA-1236975 Antigen processing-Cross presentation;R-HSA-1236978 Cross-presentation of soluble…		MYC TARGETS V1	https://www.gsea-msigdb.org/gsea/msigdb/cards/HALLMARK_MYC_TARGETS_V1
O14828	Secretory carrier-associated membrane protein 3 OS=Homo sapiens OX=9606 GN=SCAMP3 PE=1 SV=3	SCAMP3	1.0246	None	38.287	18.7	4	4	4	380940	390310	0.987851	1.01215	plasma membrane	K19995			GO:0001101 response to acid chemical; GO:0001505 regulation of neurotransmitter levels; GO:0003008 system process; GO:0006810 transport; GO:0006836 neurotransmitter transport; GO:0006886 intracellular protein transport; GO:0006887 exocytosis; GO:0006892 post-Golgi vesicle-mediated transport; GO:0007154 cell communication; GO:0007267 cell-cell signaling; GO:0007268 chemical synaptic transmission; …	GO:0000139 Golgi membrane; GO:0005622 intracellular anatomical structure; GO:0005737 cytoplasm; GO:0005794 Golgi apparatus; GO:0008021 synaptic vesicle; GO:0012505 endomembrane system; GO:0016020 membrane; GO:0030133 transport vesicle; GO:0030424 axon; GO:0031090 organelle membrane; GO:0031410 cytoplasmic vesicle; GO:0031982 vesicle; GO:0031984 organelle subcompartment; GO:0042995 cell projection…	GO:0005488 binding; GO:0005515 protein binding; GO:0019899 enzyme binding; GO:0031625 ubiquitin protein ligase binding; GO:0044389 ubiquitin-like protein ligase binding;			U	KOG3088	Secretory carrier membrane protein						PROTEIN SECRETION	https://www.gsea-msigdb.org/gsea/msigdb/cards/HALLMARK_PROTEIN_SECRETION
O14841	5-oxoprolinase OS=Homo sapiens OX=9606 GN=OPLAH PE=1 SV=3	OPLAH	0.984252	None	137.46	15.1	12	12	12	74232	73063	1.00794	0.992064	cytoplasm	K01469	OPLAH; 5-oxoprolinase (ATP-hydrolysing) [EC:3.5.2.9]	hsa00480 Glutathione metabolism; hsa01100 Metabolic pathways	GO:0006518 peptide metabolic process; GO:0006575 cellular modified amino acid metabolic process; GO:0006749 glutathione metabolic process; GO:0006750 glutathione biosynthetic process; GO:0006790 sulfur compound metabolic process; GO:0006807 nitrogen compound metabolic process; GO:0008152 metabolic process; GO:0009058 biosynthetic process; GO:0009987 cellular process; GO:0019184 nonribosomal pepti…	GO:0005622 intracellular anatomical structure; GO:0005737 cytoplasm; GO:0005829 cytosol;	GO:0003824 catalytic activity; GO:0016787 hydrolase activity; GO:0016810 hydrolase activity, acting on carbon-nitrogen (but not peptide) bonds; GO:0016812 hydrolase activity, acting on carbon-nitrogen (but not peptide) bonds, in cyclic amides; GO:0017168 5-oxoprolinase (ATP-hydrolyzing) activity;	PF19278	PF19278 Hydantoinase/oxoprolinase C-terminal domain	E	KOG1939	Oxoprolinase	WP4518 GAMMAGLUTAMYL CYCLE FOR THE BIOSYNTHESIS AND DEGRADATION OF GLUTATHIONE INCLUDING DISEASES;WP100 GLUTATHIONE METABOLISM	http://www.wikipathways.org/instance/WP4518_r119313;http://www.wikipathways.org/instance/WP100_r107114		R-HSA-1430728 Metabolism;R-HSA-156580 Phase II - Conjugation of compounds;R-HSA-156590 Glutathione conjugation;R-HSA-1643685 Disease;R-HSA-174403 Glutathione synthesis and recycling;R-HSA-211859 Biological oxidations;R-HSA-5578998 Defective OPLAH causes OPLAHD;R-HSA-5579029 Metabolic disorders of biological oxidation enzymes;R-HSA-5668914 Diseases of metabolism	https://reactome.org/PathwayBrowser/#/R-HSA-1430728;https://reactome.org/PathwayBrowser/#/R-HSA-156580;https://reactome.org/PathwayBrowser/#/R-HSA-156590;https://reactome.org/PathwayBrowser/#/R-HSA-1643685;https://reactome.org/PathwayBrowser/#/R-HSA-174403;https://reactome.org/PathwayBrowser/#/R-HSA-211859;https://reactome.org/PathwayBrowser/#/R-HSA-5578998;https://reactome.org/PathwayBrowser/#/R…
O14867	Transcription regulator protein BACH1 OS=Homo sapiens OX=9606 GN=BACH1 PE=1 SV=2	BACH1		None	81.957	1.8	1	1	1	0	0			nucleus	K09042			GO:0000082 G1/S transition of mitotic cell cycle; GO:0000083 regulation of transcription involved in G1/S transition of mitotic cell cycle; GO:0000086 G2/M transition of mitotic cell cycle; GO:0000117 regulation of transcription involved in G2/M transition of mitotic cell cycle; GO:0000122 negative regulation of transcription by RNA polymerase II; GO:0000278 mitotic cell cycle; GO:0001666 respons…	GO:0000151 ubiquitin ligase complex; GO:0005622 intracellular anatomical structure; GO:0005634 nucleus; GO:0031461 cullin-RING ubiquitin ligase complex; GO:0031463 Cul3-RING ubiquitin ligase complex; GO:0032991 protein-containing complex; GO:0043226 organelle; GO:0043227 membrane-bounded organelle; GO:0043229 intracellular organelle; GO:0043231 intracellular membrane-bounded organelle; GO:1902494…	GO:0000976 transcription cis-regulatory region binding; GO:0000977 RNA polymerase II transcription regulatory region sequence-specific DNA binding; GO:0000981 DNA-binding transcription factor activity, RNA polymerase II-specific; GO:0001067 transcription regulatory region nucleic acid binding; GO:0001227 DNA-binding transcription repressor activity, RNA polymerase II-specific; GO:0001228 DNA-bind…	PF00651	PF00651 BTB/POZ domain	K	KOG3863	bZIP transcription factor NRF1	WP4313 FERROPTOSIS;WP1971 INTEGRATED CANCER PATHWAY	http://www.wikipathways.org/instance/WP4313_r120500;http://www.wikipathways.org/instance/WP1971_r117762	Transcription factor	R-HSA-2262752 Cellular responses to stress;R-HSA-8953897 Cellular responses to stimuli;R-HSA-9707564 Cytoprotection by HMOX1;R-HSA-9707587 Regulation of HMOX1 expression and activity;R-HSA-9707616 Heme signaling;R-HSA-9708530 Regulation of BACH1 activity;R-HSA-9711123 Cellular response to chemical stress;R-HSA-9755511 KEAP1-NFE2L2 pathway;R-HSA-9759194 Nuclear events mediated by NFE2L2	https://reactome.org/PathwayBrowser/#/R-HSA-2262752;https://reactome.org/PathwayBrowser/#/R-HSA-8953897;https://reactome.org/PathwayBrowser/#/R-HSA-9707564;https://reactome.org/PathwayBrowser/#/R-HSA-9707587;https://reactome.org/PathwayBrowser/#/R-HSA-9707616;https://reactome.org/PathwayBrowser/#/R-HSA-9708530;https://reactome.org/PathwayBrowser/#/R-HSA-9711123;https://reactome.org/PathwayBrowser…	HEME METABOLISM	https://www.gsea-msigdb.org/gsea/msigdb/cards/HALLMARK_HEME_METABOLISM
O14880	Microsomal glutathione S-transferase 3 OS=Homo sapiens OX=9606 GN=MGST3 PE=1 SV=1	MGST3	1.05242	None	16.516	34.2	5	5	5	2756400	2900900	0.974458	1.02554	extracellular	K00799	GST; glutathione S-transferase [EC:2.5.1.18]	hsa05204 Chemical carcinogenesis - DNA adducts; hsa00480 Glutathione metabolism; hsa05208 Chemical carcinogenesis - reactive oxygen species; hsa00982 Drug metabolism - cytochrome P450; hsa05200 Pathways in cancer; hsa05207 Chemical carcinogenesis - receptor activation; hsa05418 Fluid shear stress and atherosclerosis; hsa05225 Hepatocellular carcinoma; hsa00983 Drug metabolism - other enzymes; hsa…	GO:0006082 organic acid metabolic process; GO:0006629 lipid metabolic process; GO:0006690 icosanoid metabolic process; GO:0006691 leukotriene metabolic process; GO:0006790 sulfur compound metabolic process; GO:0006805 xenobiotic metabolic process; GO:0006807 nitrogen compound metabolic process; GO:0008152 metabolic process; GO:0009058 biosynthetic process; GO:0009410 response to xenobiotic stimul…	GO:0005622 intracellular anatomical structure; GO:0005634 nucleus; GO:0005635 nuclear envelope; GO:0005737 cytoplasm; GO:0005783 endoplasmic reticulum; GO:0005789 endoplasmic reticulum membrane; GO:0012505 endomembrane system; GO:0016020 membrane; GO:0031967 organelle envelope; GO:0031975 envelope; GO:0031984 organelle subcompartment; GO:0042175 nuclear outer membrane-endoplasmic reticulum membra…	GO:0003824 catalytic activity; GO:0004364 glutathione transferase activity; GO:0004464 leukotriene-C4 synthase activity; GO:0004601 peroxidase activity; GO:0004602 glutathione peroxidase activity; GO:0016209 antioxidant activity; GO:0016491 oxidoreductase activity; GO:0016684 oxidoreductase activity, acting on peroxide as acceptor; GO:0016740 transferase activity; GO:0016765 transferase activity,…						WP702 METAPATHWAY BIOTRANSFORMATION PHASE I AND II;WP2884 NRF2 PATHWAY;WP2882 NUCLEAR RECEPTORS METAPATHWAY	http://www.wikipathways.org/instance/WP702_r106643;http://www.wikipathways.org/instance/WP2884_r106658;http://www.wikipathways.org/instance/WP2882_r117808		R-HSA-1430728 Metabolism;R-HSA-156580 Phase II - Conjugation of compounds;R-HSA-156590 Glutathione conjugation;R-HSA-211859 Biological oxidations;R-HSA-5423646 Aflatoxin activation and detoxification	https://reactome.org/PathwayBrowser/#/R-HSA-1430728;https://reactome.org/PathwayBrowser/#/R-HSA-156580;https://reactome.org/PathwayBrowser/#/R-HSA-156590;https://reactome.org/PathwayBrowser/#/R-HSA-211859;https://reactome.org/PathwayBrowser/#/R-HSA-5423646	ADIPOGENESIS;HEME METABOLISM;OXIDATIVE PHOSPHORYLATION	https://www.gsea-msigdb.org/gsea/msigdb/cards/HALLMARK_ADIPOGENESIS;https://www.gsea-msigdb.org/gsea/msigdb/cards/HALLMARK_HEME_METABOLISM;https://www.gsea-msigdb.org/gsea/msigdb/cards/HALLMARK_OXIDATIVE_PHOSPHORYLATION
O14893	Gem-associated protein 2 OS=Homo sapiens OX=9606 GN=GEMIN2 PE=1 SV=1	GEMIN2	0.727494	None	31.585	15.7	3	3	3	152180	110710	1.15775	0.842253	nucleus	K13130			GO:0000245 spliceosomal complex assembly; GO:0000375 RNA splicing, via transesterification reactions; GO:0000377 RNA splicing, via transesterification reactions with bulged adenosine as nucleophile; GO:0000387 spliceosomal snRNP assembly; GO:0000398 mRNA splicing, via spliceosome; GO:0006139 nucleobase-containing compound metabolic process; GO:0006396 RNA processing; GO:0006397 mRNA processing; G…	GO:0005622 intracellular anatomical structure; GO:0005634 nucleus; GO:0005654 nucleoplasm; GO:0005730 nucleolus; GO:0005737 cytoplasm; GO:0005829 cytosol; GO:0016604 nuclear body; GO:0031974 membrane-enclosed lumen; GO:0031981 nuclear lumen; GO:0032797 SMN complex; GO:0032991 protein-containing complex; GO:0034718 SMN-Gemin2 complex; GO:0034719 SMN-Sm protein complex; GO:0034730 SmD-containing SM…	GO:0005488 binding; GO:0005515 protein binding;									R-HSA-1643685 Disease;R-HSA-191859 snRNP Assembly;R-HSA-194441 Metabolism of non-coding RNA;R-HSA-5663205 Infectious disease;R-HSA-8953854 Metabolism of RNA;R-HSA-9679506 SARS-CoV Infections;R-HSA-9694516 SARS-CoV-2 Infection;R-HSA-9705683 SARS-CoV-2-host interactions;R-HSA-9754678 SARS-CoV-2 modulates host translation machinery	https://reactome.org/PathwayBrowser/#/R-HSA-1643685;https://reactome.org/PathwayBrowser/#/R-HSA-191859;https://reactome.org/PathwayBrowser/#/R-HSA-194441;https://reactome.org/PathwayBrowser/#/R-HSA-5663205;https://reactome.org/PathwayBrowser/#/R-HSA-8953854;https://reactome.org/PathwayBrowser/#/R-HSA-9679506;https://reactome.org/PathwayBrowser/#/R-HSA-9694516;https://reactome.org/PathwayBrowser/#…
O14896	Interferon regulatory factor 6 OS=Homo sapiens OX=9606 GN=IRF6 PE=1 SV=1	IRF6	0.93533	None	53.129	8.6	3	3	3	92052	86099	1.03342	0.966585	mitochondria	K10154			GO:0002376 immune system process; GO:0006139 nucleobase-containing compound metabolic process; GO:0006351 transcription, DNA-templated; GO:0006355 regulation of transcription, DNA-templated; GO:0006357 regulation of transcription by RNA polymerase II; GO:0006366 transcription by RNA polymerase II; GO:0006725 cellular aromatic compound metabolic process; GO:0006807 nitrogen compound metabolic proc…	GO:0005622 intracellular anatomical structure; GO:0005634 nucleus; GO:0005737 cytoplasm; GO:0005829 cytosol; GO:0030054 cell junction; GO:0043226 organelle; GO:0043227 membrane-bounded organelle; GO:0043229 intracellular organelle; GO:0043231 intracellular membrane-bounded organelle;	GO:0000981 DNA-binding transcription factor activity, RNA polymerase II-specific; GO:0001228 DNA-binding transcription activator activity, RNA polymerase II-specific; GO:0003676 nucleic acid binding; GO:0003677 DNA binding; GO:0003700 DNA-binding transcription factor activity; GO:0005488 binding; GO:0043565 sequence-specific DNA binding; GO:0097159 organic cyclic compound binding; GO:0140110 tran…	PF00605	PF00605 Interferon regulatory factor transcription factor				WP254 APOPTOSIS;WP4674 HEAD AND NECK SQUAMOUS CELL CARCINOMA;WP3655 HYPOTHETICAL CRANIOFACIAL DEVELOPMENT PATHWAY;WP4754 IL18 SIGNALING PATHWAY;WP2572 PRIMARY FOCAL SEGMENTAL GLOMERULOSCLEROSIS FSGS	http://www.wikipathways.org/instance/WP254_r118382;http://www.wikipathways.org/instance/WP4674_r117748;http://www.wikipathways.org/instance/WP3655_r117757;http://www.wikipathways.org/instance/WP4754_r115147;http://www.wikipathways.org/instance/WP2572_r119251	Transcription factor	R-HSA-1280215 Cytokine Signaling in Immune system;R-HSA-168256 Immune System;R-HSA-877300 Interferon gamma signaling;R-HSA-909733 Interferon alpha/beta signaling;R-HSA-913531 Interferon Signaling	https://reactome.org/PathwayBrowser/#/R-HSA-1280215;https://reactome.org/PathwayBrowser/#/R-HSA-168256;https://reactome.org/PathwayBrowser/#/R-HSA-877300;https://reactome.org/PathwayBrowser/#/R-HSA-909733;https://reactome.org/PathwayBrowser/#/R-HSA-913531	IL2 STAT5 SIGNALING	https://www.gsea-msigdb.org/gsea/msigdb/cards/HALLMARK_IL2_STAT5_SIGNALING
O14907	Tax1-binding protein 3 OS=Homo sapiens OX=9606 GN=TAX1BP3 PE=1 SV=2	TAX1BP3		None	13.735	25	2	1	2	0	0			cytoplasm	K24067			GO:0007154 cell communication; GO:0007165 signal transduction; GO:0007264 small GTPase mediated signal transduction; GO:0007265 Ras protein signal transduction; GO:0007266 Rho protein signal transduction; GO:0008285 negative regulation of cell population proliferation; GO:0009966 regulation of signal transduction; GO:0009968 negative regulation of signal transduction; GO:0009987 cellular process;…	GO:0001650 fibrillar center; GO:0005622 intracellular anatomical structure; GO:0005634 nucleus; GO:0005730 nucleolus; GO:0005737 cytoplasm; GO:0005829 cytosol; GO:0005856 cytoskeleton; GO:0005886 plasma membrane; GO:0015629 actin cytoskeleton; GO:0016020 membrane; GO:0031974 membrane-enclosed lumen; GO:0031981 nuclear lumen; GO:0043226 organelle; GO:0043227 membrane-bounded organelle; GO:0043228 …	GO:0005488 binding; GO:0005515 protein binding; GO:0008013 beta-catenin binding; GO:0008022 protein C-terminus binding;	PF00595	PF00595 PDZ domain	M	KOG3553	Tax interaction protein TIP1				R-HSA-162582 Signal Transduction;R-HSA-194315 Signaling by Rho GTPases;R-HSA-195258 RHO GTPase Effectors;R-HSA-5666185 RHO GTPases Activate Rhotekin and Rhophilins;R-HSA-9716542 Signaling by Rho GTPases, Miro GTPases and RHOBTB3	https://reactome.org/PathwayBrowser/#/R-HSA-162582;https://reactome.org/PathwayBrowser/#/R-HSA-194315;https://reactome.org/PathwayBrowser/#/R-HSA-195258;https://reactome.org/PathwayBrowser/#/R-HSA-5666185;https://reactome.org/PathwayBrowser/#/R-HSA-9716542	P53 PATHWAY	https://www.gsea-msigdb.org/gsea/msigdb/cards/HALLMARK_P53_PATHWAY
O14908	PDZ domain-containing protein GIPC1 OS=Homo sapiens OX=9606 GN=GIPC1 PE=1 SV=2	GIPC1	0.892335	None	36.049	16.8	4	4	4	59044	52687	1.0569	0.943104	nucleus	K20056			GO:0000902 cell morphogenesis; GO:0000904 cell morphogenesis involved in differentiation; GO:0001667 ameboidal-type cell migration; GO:0001736 establishment of planar polarity; GO:0001738 morphogenesis of a polarized epithelium; GO:0002009 morphogenesis of an epithelium; GO:0006605 protein targeting; GO:0006810 transport; GO:0006811 ion transport; GO:0006820 anion transport; GO:0006835 dicarboxyl…	GO:0005622 intracellular anatomical structure; GO:0005737 cytoplasm; GO:0005829 cytosol; GO:0005903 brush border; GO:0005938 cell cortex; GO:0008021 synaptic vesicle; GO:0012505 endomembrane system; GO:0012506 vesicle membrane; GO:0016020 membrane; GO:0030133 transport vesicle; GO:0030139 endocytic vesicle; GO:0030425 dendrite; GO:0031090 organelle membrane; GO:0031410 cytoplasmic vesicle; GO:003…	GO:0001965 G-protein alpha-subunit binding; GO:0003779 actin binding; GO:0005096 GTPase activator activity; GO:0005102 signaling receptor binding; GO:0005488 binding; GO:0005515 protein binding; GO:0008047 enzyme activator activity; GO:0008092 cytoskeletal protein binding; GO:0017022 myosin binding; GO:0019904 protein domain specific binding; GO:0030165 PDZ domain binding; GO:0030234 enzyme regul…	PF00595	PF00595 PDZ domain	TU	KOG3938	RGS-GAIP interacting protein GIPC, contains PDZ domain	WP3888 VEGFAVEGFR2 SIGNALING PATHWAY	http://www.wikipathways.org/instance/WP3888_r116782
O14920	Inhibitor of nuclear factor kappa-B kinase subunit beta OS=Homo sapiens OX=9606 GN=IKBKB PE=1 SV=1	IKBKB	0.921203	None	86.563	5.8	3	3	3	65155	60021	1.04101	0.958986	cytoplasm	K07209	IKBKB; inhibitor of nuclear factor kappa-B kinase subunit beta [EC:2.7.11.10]	hsa05120 Epithelial cell signaling in Helicobacter pylori infection; hsa05160 Hepatitis C; hsa04014 Ras signaling pathway; hsa04622 RIG-I-like receptor signaling pathway; hsa05166 Human T-cell leukemia virus 1 infection; hsa05200 Pathways in cancer; hsa01523 Antifolate resistance; hsa04621 NOD-like receptor signaling pathway; hsa04210 Apoptosis; hsa05206 MicroRNAs in cancer; hsa04660 T cell recep…	GO:0000165 MAPK cascade; GO:0000302 response to reactive oxygen species; GO:0001101 response to acid chemical; GO:0001666 response to hypoxia; GO:0001776 leukocyte homeostasis; GO:0001782 B cell homeostasis; GO:0001817 regulation of cytokine production; GO:0001819 positive regulation of cytokine production; GO:0001959 regulation of cytokine-mediated signaling pathway; GO:0002028 regulation of sod…	GO:0005622 intracellular anatomical structure; GO:0005634 nucleus; GO:0005654 nucleoplasm; GO:0005737 cytoplasm; GO:0005829 cytosol; GO:0005886 plasma membrane; GO:0005887 integral component of plasma membrane; GO:0008385 IkappaB kinase complex; GO:0009898 cytoplasmic side of plasma membrane; GO:0016020 membrane; GO:0016021 integral component of membrane; GO:0031224 intrinsic component of membran…	GO:0000166 nucleotide binding; GO:0003824 catalytic activity; GO:0004672 protein kinase activity; GO:0004674 protein serine/threonine kinase activity; GO:0005488 binding; GO:0005515 protein binding; GO:0005524 ATP binding; GO:0008384 IkappaB kinase activity; GO:0016301 kinase activity; GO:0016740 transferase activity; GO:0016772 transferase activity, transferring phosphorus-containing groups; GO:…	PF00069; PF18397; PF12179	PF00069 Protein kinase domain; PF18397 IQBAL scaffold dimerization domain; PF12179 I-kappa-kinase-beta NEMO binding domain	T	KOG4250	TANK binding protein kinase TBK1	WP2324 AGERAGE PATHWAY;WP4480 ALTERED GLYCOSYLATION OF MUC1 IN TUMOR MICROENVIRONMENT;WP5124 ALZHEIMERS DISEASE;WP2059 ALZHEIMERS DISEASE AND MIRNA EFFECTS;WP5113 ANTIVIRAL AND ANTIINFLAMMATORY EFFECTS OF NRF2 ON SARSCOV2 PATHWAY;WP254 APOPTOSIS;WP1772 APOPTOSIS MODULATION AND SIGNALING;WP4788 AUTOSOMAL RECESSIVE OSTEOPETROSIS PATHWAYS;WP23 B CELL RECEPTOR SIGNALING PATHWAY;WP2380 BRAINDERIVED NE…		Transcription factor	R-HSA-1168372 Downstream signaling events of B Cell Receptor (BCR);R-HSA-1169091 Activation of NF-kappaB in B cells;R-HSA-1236974 ER-Phagosome pathway;R-HSA-1236975 Antigen processing-Cross presentation;R-HSA-1280215 Cytokine Signaling in Immune system;R-HSA-1280218 Adaptive Immune System;R-HSA-1606322 ZBP1(DAI) mediated induction of type I IFNs;R-HSA-162582 Signal Transduction;R-HSA-1643685 Dise…		ALLOGRAFT REJECTION	https://www.gsea-msigdb.org/gsea/msigdb/cards/HALLMARK_ALLOGRAFT_REJECTION
O14925	Mitochondrial import inner membrane translocase subunit Tim23 OS=Homo sapiens OX=9606 GN=TIMM23 PE=1 SV=1	TIMM23	1.15784	None	21.943	26.8	4	4	4	508230	588450	0.926852	1.07315	cytoplasm	K17794			GO:0001101 response to acid chemical; GO:0006605 protein targeting; GO:0006626 protein targeting to mitochondrion; GO:0006810 transport; GO:0006839 mitochondrial transport; GO:0006886 intracellular protein transport; GO:0006996 organelle organization; GO:0007005 mitochondrion organization; GO:0007006 mitochondrial membrane organization; GO:0007007 inner mitochondrial membrane organization; GO:000…	GO:0005622 intracellular anatomical structure; GO:0005737 cytoplasm; GO:0005739 mitochondrion; GO:0005740 mitochondrial envelope; GO:0005743 mitochondrial inner membrane; GO:0005744 TIM23 mitochondrial import inner membrane translocase complex; GO:0005758 mitochondrial intermembrane space; GO:0016020 membrane; GO:0016021 integral component of membrane; GO:0019866 organelle inner membrane; GO:0031…	GO:0005048 signal sequence binding; GO:0005215 transporter activity; GO:0005488 binding; GO:0005515 protein binding; GO:0008320 protein transmembrane transporter activity; GO:0015399 primary active transmembrane transporter activity; GO:0015450 protein-transporting ATPase activity; GO:0019899 enzyme binding; GO:0022804 active transmembrane transporter activity; GO:0022857 transmembrane transporte…			U	KOG3324	Mitochondrial import inner membrane translocase, subunit TIM23				R-HSA-1268020 Mitochondrial protein import;R-HSA-9609507 Protein localization	https://reactome.org/PathwayBrowser/#/R-HSA-1268020;https://reactome.org/PathwayBrowser/#/R-HSA-9609507
O14929	Histone acetyltransferase type B catalytic subunit OS=Homo sapiens OX=9606 GN=HAT1 PE=1 SV=2	HAT1	1.24079	None	49.54	32.9	8	8	8	739030	916980	0.892543	1.10746	cytoplasm	K11303	HAT1; histone acetyltransferase 1 [EC:2.3.1.48]	hsa04613 Neutrophil extracellular trap formation; hsa05034 Alcoholism	GO:0006323 DNA packaging; GO:0006325 chromatin organization; GO:0006333 chromatin assembly or disassembly; GO:0006334 nucleosome assembly; GO:0006335 DNA replication-dependent chromatin assembly; GO:0006336 DNA replication-independent chromatin assembly; GO:0006338 chromatin remodeling; GO:0006464 cellular protein modification process; GO:0006473 protein acetylation; GO:0006475 internal protein a…	GO:0000228 nuclear chromosome; GO:0000785 chromatin; GO:0005622 intracellular anatomical structure; GO:0005634 nucleus; GO:0005654 nucleoplasm; GO:0005694 chromosome; GO:0005737 cytoplasm; GO:0016363 nuclear matrix; GO:0031974 membrane-enclosed lumen; GO:0031981 nuclear lumen; GO:0032991 protein-containing complex; GO:0034399 nuclear periphery; GO:0043226 organelle; GO:0043227 membrane-bounded or…	GO:0003824 catalytic activity; GO:0004402 histone acetyltransferase activity; GO:0005488 binding; GO:0005515 protein binding; GO:0008080 N-acetyltransferase activity; GO:0010485 H4 histone acetyltransferase activity; GO:0016407 acetyltransferase activity; GO:0016410 N-acyltransferase activity; GO:0016740 transferase activity; GO:0016746 acyltransferase activity; GO:0016747 acyltransferase activit…	PF10394	PF10394 Histone acetyl transferase HAT1 N-terminus	B	KOG2696	Histone acetyltransferase type b catalytic subunit	WP3996 ETHANOL EFFECTS ON HISTONE MODIFICATIONS	http://www.wikipathways.org/instance/WP3996_r107156		R-HSA-3214847 HATs acetylate histones;R-HSA-3247509 Chromatin modifying enzymes;R-HSA-4839726 Chromatin organization	https://reactome.org/PathwayBrowser/#/R-HSA-3214847;https://reactome.org/PathwayBrowser/#/R-HSA-3247509;https://reactome.org/PathwayBrowser/#/R-HSA-4839726
O14936	Peripheral plasma membrane protein CASK OS=Homo sapiens OX=9606 GN=CASK PE=1 SV=3	CASK	1.49971	None	105.12	8.6	6	6	6	30936	46395	0.800093	1.19991	cytoplasm	K06103			GO:0000003 reproduction; GO:0001505 regulation of neurotransmitter levels; GO:0001667 ameboidal-type cell migration; GO:0001941 postsynaptic membrane organization; GO:0001952 regulation of cell-matrix adhesion; GO:0001953 negative regulation of cell-matrix adhesion; GO:0002064 epithelial cell development; GO:0002065 columnar/cuboidal epithelial cell differentiation; GO:0002066 columnar/cuboidal e…	GO:0005576 extracellular region; GO:0005604 basement membrane; GO:0005622 intracellular anatomical structure; GO:0005634 nucleus; GO:0005652 nuclear lamina; GO:0005730 nucleolus; GO:0005737 cytoplasm; GO:0005829 cytosol; GO:0005856 cytoskeleton; GO:0005886 plasma membrane; GO:0005911 cell-cell junction; GO:0005929 cilium; GO:0014069 postsynaptic density; GO:0015629 actin cytoskeleton; GO:0016020 …	GO:0003824 catalytic activity; GO:0004385 guanylate kinase activity; GO:0005102 signaling receptor binding; GO:0005159 insulin-like growth factor receptor binding; GO:0005488 binding; GO:0005515 protein binding; GO:0008022 protein C-terminus binding; GO:0016301 kinase activity; GO:0016740 transferase activity; GO:0016772 transferase activity, transferring phosphorus-containing groups; GO:0016776 …	PF00069; PF02828; PF00595; PF00018; PF00625	PF00069 Protein kinase domain; PF02828 L27 domain; PF00595 PDZ domain; PF00018 SH3 domain; PF00625 Guanylate kinase	T	KOG0609	Calcium/calmodulin-dependent serine protein kinase/membrane-associated guanylate kinase	WP2359 PARKINUBIQUITIN PROTEASOMAL SYSTEM PATHWAY;WP4148 SPLICING FACTOR NOVA REGULATED SYNAPTIC PROTEINS	http://www.wikipathways.org/instance/WP2359_r119918;http://www.wikipathways.org/instance/WP4148_r110682		R-HSA-112310 Neurotransmitter release cycle;R-HSA-112314 Neurotransmitter receptors and postsynaptic signal transmission;R-HSA-112315 Transmission across Chemical Synapses;R-HSA-112316 Neuronal System;R-HSA-1474244 Extracellular matrix organization;R-HSA-1500931 Cell-Cell communication;R-HSA-212676 Dopamine Neurotransmitter Release Cycle;R-HSA-3000170 Syndecan interactions;R-HSA-3000171 Non-integ…	https://reactome.org/PathwayBrowser/#/R-HSA-112310;https://reactome.org/PathwayBrowser/#/R-HSA-112314;https://reactome.org/PathwayBrowser/#/R-HSA-112315;https://reactome.org/PathwayBrowser/#/R-HSA-112316;https://reactome.org/PathwayBrowser/#/R-HSA-1474244;https://reactome.org/PathwayBrowser/#/R-HSA-1500931;https://reactome.org/PathwayBrowser/#/R-HSA-212676;https://reactome.org/PathwayBrowser/#/R-…
O14939	Phospholipase D2 OS=Homo sapiens OX=9606 GN=PLD2 PE=1 SV=2	PLD2	0.773786	None	105.99	7.4	5	5	5	26970	20869	1.12753	0.872468	nucleus	K01115	PLD1_2; phospholipase D1/2 [EC:3.1.4.4]	hsa04666 Fc gamma R-mediated phagocytosis; hsa04014 Ras signaling pathway; hsa05208 Chemical carcinogenesis - reactive oxygen species; hsa05200 Pathways in cancer; hsa04071 Sphingolipid signaling pathway; hsa01100 Metabolic pathways; hsa04072 Phospholipase D signaling pathway; hsa04724 Glutamatergic synapse; hsa04928 Parathyroid hormone synthesis, secretion and action; hsa05212 Pancreatic cancer;…	GO:0000302 response to reactive oxygen species; GO:0001666 response to hypoxia; GO:0001775 cell activation; GO:0002029 desensitization of G protein-coupled receptor signaling pathway; GO:0002031 G protein-coupled receptor internalization; GO:0002252 immune effector process; GO:0002253 activation of immune response; GO:0002263 cell activation involved in immune response; GO:0002274 myeloid leukocy…	GO:0005622 intracellular anatomical structure; GO:0005634 nucleus; GO:0005737 cytoplasm; GO:0005768 endosome; GO:0005783 endoplasmic reticulum; GO:0005789 endoplasmic reticulum membrane; GO:0005794 Golgi apparatus; GO:0005886 plasma membrane; GO:0005901 caveola; GO:0005903 brush border; GO:0012505 endomembrane system; GO:0012506 vesicle membrane; GO:0016020 membrane; GO:0016324 apical plasma memb…	GO:0003824 catalytic activity; GO:0004620 phospholipase activity; GO:0004630 phospholipase D activity; GO:0005080 protein kinase C binding; GO:0005488 binding; GO:0005515 protein binding; GO:0008081 phosphoric diester hydrolase activity; GO:0016298 lipase activity; GO:0016787 hydrolase activity; GO:0016788 hydrolase activity, acting on ester bonds; GO:0019899 enzyme binding; GO:0019900 kinase bin…	PF00787; PF13091	PF00787 PX domain; PF13091 PLD-like domain	I	KOG1329	Phospholipase D1	WP437 EGFEGFR SIGNALING PATHWAY;WP4223 RAS SIGNALING	http://www.wikipathways.org/instance/WP437_r120689;http://www.wikipathways.org/instance/WP4223_r119284		R-HSA-1430728 Metabolism;R-HSA-1483148 Synthesis of PG;R-HSA-1483166 Synthesis of PA;R-HSA-1483206 Glycerophospholipid biosynthesis;R-HSA-1483257 Phospholipid metabolism;R-HSA-162582 Signal Transduction;R-HSA-168249 Innate Immune System;R-HSA-168256 Immune System;R-HSA-194315 Signaling by Rho GTPases;R-HSA-2029480 Fcgamma receptor (FCGR) dependent phagocytosis;R-HSA-2029485 Role of phospholipids …	https://reactome.org/PathwayBrowser/#/R-HSA-1430728;https://reactome.org/PathwayBrowser/#/R-HSA-1483148;https://reactome.org/PathwayBrowser/#/R-HSA-1483166;https://reactome.org/PathwayBrowser/#/R-HSA-1483206;https://reactome.org/PathwayBrowser/#/R-HSA-1483257;https://reactome.org/PathwayBrowser/#/R-HSA-162582;https://reactome.org/PathwayBrowser/#/R-HSA-168249;https://reactome.org/PathwayBrowser/#…
O14949	Cytochrome b-c1 complex subunit 8 OS=Homo sapiens OX=9606 GN=UQCRQ PE=1 SV=4	UQCRQ	1.07291	None	9.9062	25.6	2	2	2	323670	347270	0.964825	1.03517	mitochondria	K00418	QCR8; ubiquinol-cytochrome c reductase subunit 8	hsa04932 Non-alcoholic fatty liver disease; hsa05208 Chemical carcinogenesis - reactive oxygen species; hsa05016 Huntington disease; hsa00190 Oxidative phosphorylation; hsa05415 Diabetic cardiomyopathy; hsa05012 Parkinson disease; hsa05010 Alzheimer disease; hsa04260 Cardiac muscle contraction; hsa04714 Thermogenesis; hsa05022 Pathways of neurodegeneration - multiple diseases; hsa05014 Amyotrophi…	GO:0006091 generation of precursor metabolites and energy; GO:0006119 oxidative phosphorylation; GO:0006122 mitochondrial electron transport, ubiquinol to cytochrome c; GO:0006139 nucleobase-containing compound metabolic process; GO:0006163 purine nucleotide metabolic process; GO:0006725 cellular aromatic compound metabolic process; GO:0006753 nucleoside phosphate metabolic process; GO:0006793 ph…	GO:0005622 intracellular anatomical structure; GO:0005737 cytoplasm; GO:0005739 mitochondrion; GO:0005740 mitochondrial envelope; GO:0005743 mitochondrial inner membrane; GO:0005746 mitochondrial respirasome; GO:0005750 mitochondrial respiratory chain complex III; GO:0016020 membrane; GO:0019866 organelle inner membrane; GO:0031090 organelle membrane; GO:0031966 mitochondrial membrane; GO:0031967…	GO:0003824 catalytic activity; GO:0005488 binding; GO:0008121 ubiquinol-cytochrome-c reductase activity; GO:0009055 electron transfer activity; GO:0016491 oxidoreductase activity; GO:0016679 oxidoreductase activity, acting on diphenols and related substances as donors; GO:0048038 quinone binding; GO:0048039 ubiquinone binding;			C	KOG4116	Ubiquinol cytochrome c reductase, subunit QCR8	WP111 ELECTRON TRANSPORT CHAIN OXPHOS SYSTEM IN MITOCHONDRIA;WP4921 MITOCHONDRIAL COMPLEX III ASSEMBLY;WP4396 NONALCOHOLIC FATTY LIVER DISEASE	http://www.wikipathways.org/instance/WP111_r117097;http://www.wikipathways.org/instance/WP4921_r116643;http://www.wikipathways.org/instance/WP4396_r98945		R-HSA-1428517 The citric acid (TCA) cycle and respiratory electron transport;R-HSA-1430728 Metabolism;R-HSA-163200 Respiratory electron transport, ATP synthesis by chemiosmotic coupling, and heat production by uncoupling proteins.;R-HSA-611105 Respiratory electron transport	https://reactome.org/PathwayBrowser/#/R-HSA-1428517;https://reactome.org/PathwayBrowser/#/R-HSA-1430728;https://reactome.org/PathwayBrowser/#/R-HSA-163200;https://reactome.org/PathwayBrowser/#/R-HSA-611105	ADIPOGENESIS;OXIDATIVE PHOSPHORYLATION	https://www.gsea-msigdb.org/gsea/msigdb/cards/HALLMARK_ADIPOGENESIS;https://www.gsea-msigdb.org/gsea/msigdb/cards/HALLMARK_OXIDATIVE_PHOSPHORYLATION
P19105	Myosin regulatory light chain 12A OS=Homo sapiens OX=9606 GN=MYL12A PE=1 SV=2	MYL12A	1.03527	None	19.794	56.1	7	7	7	2270800	2350900	0.982669	1.01733	mitochondria	K12757	MYL12; myosin regulatory light chain 12	hsa04510 Focal adhesion; hsa04360 Axon guidance; hsa04530 Tight junction; hsa05131 Shigellosis; hsa05132 Salmonella infection; hsa04810 Regulation of actin cytoskeleton; hsa04670 Leukocyte transendothelial migration; hsa04611 Platelet activation	GO:0003008 system process; GO:0003012 muscle system process; GO:0006936 muscle contraction; GO:0032501 multicellular organismal process;	GO:0005622 intracellular anatomical structure; GO:0005737 cytoplasm; GO:0005829 cytosol;		PF13405; PF08976	PF13405 EF-hand domain; PF08976 EF-hand domain	Z	KOG0031	Myosin regulatory light chain, EF-Hand protein superfamily	WP306 FOCAL ADHESION	http://www.wikipathways.org/instance/WP306_r116784		R-HSA-1266738 Developmental Biology;R-HSA-2682334 EPH-Ephrin signaling;R-HSA-3928664 Ephrin signaling;R-HSA-397014 Muscle contraction;R-HSA-422475 Axon guidance;R-HSA-445355 Smooth Muscle Contraction;R-HSA-9675108 Nervous system development	https://reactome.org/PathwayBrowser/#/R-HSA-1266738;https://reactome.org/PathwayBrowser/#/R-HSA-2682334;https://reactome.org/PathwayBrowser/#/R-HSA-3928664;https://reactome.org/PathwayBrowser/#/R-HSA-397014;https://reactome.org/PathwayBrowser/#/R-HSA-422475;https://reactome.org/PathwayBrowser/#/R-HSA-445355;https://reactome.org/PathwayBrowser/#/R-HSA-9675108	ANDROGEN RESPONSE	https://www.gsea-msigdb.org/gsea/msigdb/cards/HALLMARK_ANDROGEN_RESPONSE
O14964	Hepatocyte growth factor-regulated tyrosine kinase substrate OS=Homo sapiens OX=9606 GN=HGS PE=1 SV=1	HGS	0.954245	None	86.191	23.3	15	15	15	253740	242130	1.02341	0.976587	nucleus	K12182	HGS; hepatocyte growth factor-regulated tyrosine kinase substrate	hsa04145 Phagosome; hsa03250 Viral life cycle - HIV-1; hsa04144 Endocytosis	GO:0000003 reproduction; GO:0001505 regulation of neurotransmitter levels; GO:0001667 ameboidal-type cell migration; GO:0001932 regulation of protein phosphorylation; GO:0001933 negative regulation of protein phosphorylation; GO:0002064 epithelial cell development; GO:0002065 columnar/cuboidal epithelial cell differentiation; GO:0002066 columnar/cuboidal epithelial cell development; GO:0002791 re…	GO:0000323 lytic vacuole; GO:0005622 intracellular anatomical structure; GO:0005737 cytoplasm; GO:0005764 lysosome; GO:0005768 endosome; GO:0005769 early endosome; GO:0005770 late endosome; GO:0005771 multivesicular body; GO:0005773 vacuole; GO:0005829 cytosol; GO:0008021 synaptic vesicle; GO:0010008 endosome membrane; GO:0012505 endomembrane system; GO:0016020 membrane; GO:0030133 transport vesi…	GO:0005488 binding; GO:0005515 protein binding; GO:0005543 phospholipid binding; GO:0008289 lipid binding; GO:0019899 enzyme binding; GO:0019904 protein domain specific binding; GO:0032182 ubiquitin-like protein binding; GO:0032266 phosphatidylinositol-3-phosphate binding; GO:0035091 phosphatidylinositol binding; GO:0042802 identical protein binding; GO:0043130 ubiquitin binding; GO:0043167 ion b…	PF00790; PF01363; PF12210	PF00790 VHS domain; PF01363 FYVE zinc finger; PF12210 Hepatocyte growth factor-regulated tyrosine kinase substrate	TU	KOG1818	Membrane trafficking and cell signaling protein HRS, contains VHS and FYVE domains	WP437 EGFEGFR SIGNALING PATHWAY;WP4301 INHIBITION OF EXOSOME BIOGENESIS AND SECRETION BY MANUMYCIN A IN CRPC CELLS;WP366 TGFBETA SIGNALING PATHWAY;WP3888 VEGFAVEGFR2 SIGNALING PATHWAY	http://www.wikipathways.org/instance/WP437_r120689;http://www.wikipathways.org/instance/WP4301_r97800;http://www.wikipathways.org/instance/WP366_r120697;http://www.wikipathways.org/instance/WP3888_r116782		R-HSA-162582 Signal Transduction;R-HSA-1643685 Disease;R-HSA-177929 Signaling by EGFR;R-HSA-182971 EGFR downregulation;R-HSA-194315 Signaling by Rho GTPases;R-HSA-199991 Membrane Trafficking;R-HSA-199992 trans-Golgi Network Vesicle Budding;R-HSA-392499 Metabolism of proteins;R-HSA-432720 Lysosome Vesicle Biogenesis;R-HSA-5653656 Vesicle-mediated transport;R-HSA-5663205 Infectious disease;R-HSA-56…	https://reactome.org/PathwayBrowser/#/R-HSA-162582;https://reactome.org/PathwayBrowser/#/R-HSA-1643685;https://reactome.org/PathwayBrowser/#/R-HSA-177929;https://reactome.org/PathwayBrowser/#/R-HSA-182971;https://reactome.org/PathwayBrowser/#/R-HSA-194315;https://reactome.org/PathwayBrowser/#/R-HSA-199991;https://reactome.org/PathwayBrowser/#/R-HSA-199992;https://reactome.org/PathwayBrowser/#/R-H…
O14965	Aurora kinase A OS=Homo sapiens OX=9606 GN=AURKA PE=1 SV=3	AURKA	1.47095	None	45.823	29.5	9	8	8	112050	164820	0.809405	1.19059	cytoplasm	K11481	AURKA; aurora kinase A [EC:2.7.11.1]	hsa04914 Progesterone-mediated oocyte maturation; hsa04114 Oocyte meiosis	GO:0000003 reproduction; GO:0000022 mitotic spindle elongation; GO:0000070 mitotic sister chromatid segregation; GO:0000075 cell cycle checkpoint signaling; GO:0000077 DNA damage checkpoint signaling; GO:0000086 G2/M transition of mitotic cell cycle; GO:0000122 negative regulation of transcription by RNA polymerase II; GO:0000212 meiotic spindle organization; GO:0000226 microtubule cytoskeleton o…	GO:0000228 nuclear chromosome; GO:0000775 chromosome, centromeric region; GO:0000776 kinetochore; GO:0000779 condensed chromosome, centromeric region; GO:0000793 condensed chromosome; GO:0000794 condensed nuclear chromosome; GO:0000922 spindle pole; GO:0001674 female germ cell nucleus; GO:0005622 intracellular anatomical structure; GO:0005634 nucleus; GO:0005654 nucleoplasm; GO:0005694 chromosome…	GO:0003824 catalytic activity; GO:0004672 protein kinase activity; GO:0004674 protein serine/threonine kinase activity; GO:0004712 protein serine/threonine/tyrosine kinase activity; GO:0005488 binding; GO:0005515 protein binding; GO:0008092 cytoskeletal protein binding; GO:0016301 kinase activity; GO:0016740 transferase activity; GO:0016772 transferase activity, transferring phosphorus-containing…	PF00069	PF00069 Protein kinase domain	D	KOG0580	Serine/threonine protein kinase	WP437 EGFEGFR SIGNALING PATHWAY;WP2361 GASTRIC CANCER NETWORK 1	http://www.wikipathways.org/instance/WP437_r120689;http://www.wikipathways.org/instance/WP2361_r117731		R-HSA-1640170 Cell Cycle;R-HSA-174143 APC/C-mediated degradation of cell cycle proteins;R-HSA-174178 APC/C:Cdh1 mediated degradation of Cdc20 and other APC/C:Cdh1 targeted proteins in late mitosis/early G1;R-HSA-212436 Generic Transcription Pathway;R-HSA-2565942 Regulation of PLK1 Activity at G2/M Transition;R-HSA-2990846 SUMOylation;R-HSA-3108232 SUMO E3 ligases SUMOylate target proteins;R-HSA-3…	https://reactome.org/PathwayBrowser/#/R-HSA-1640170;https://reactome.org/PathwayBrowser/#/R-HSA-174143;https://reactome.org/PathwayBrowser/#/R-HSA-174178;https://reactome.org/PathwayBrowser/#/R-HSA-212436;https://reactome.org/PathwayBrowser/#/R-HSA-2565942;https://reactome.org/PathwayBrowser/#/R-HSA-2990846;https://reactome.org/PathwayBrowser/#/R-HSA-3108232;https://reactome.org/PathwayBrowser/#/…	E2F TARGETS;G2M CHECKPOINT;GLYCOLYSIS;MITOTIC SPINDLE;MTORC1 SIGNALING;SPERMATOGENESIS	https://www.gsea-msigdb.org/gsea/msigdb/cards/HALLMARK_E2F_TARGETS;https://www.gsea-msigdb.org/gsea/msigdb/cards/HALLMARK_G2M_CHECKPOINT;https://www.gsea-msigdb.org/gsea/msigdb/cards/HALLMARK_GLYCOLYSIS;https://www.gsea-msigdb.org/gsea/msigdb/cards/HALLMARK_MITOTIC_SPINDLE;https://www.gsea-msigdb.org/gsea/msigdb/cards/HALLMARK_MTORC1_SIGNALING;https://www.gsea-msigdb.org/gsea/msigdb/cards/HALLMAR…
O14972	Vacuolar protein sorting-associated protein 26C OS=Homo sapiens OX=9606 GN=VPS26C PE=1 SV=1	VPS26C	0.956574	None	33.01	21.9	5	5	5	167410	160140	1.0222	0.977805	cytoplasm	K25730			GO:0006810 transport; GO:0006886 intracellular protein transport; GO:0008104 protein localization; GO:0015031 protein transport; GO:0015833 peptide transport; GO:0016192 vesicle-mediated transport; GO:0016197 endosomal transport; GO:0016482 cytosolic transport; GO:0033036 macromolecule localization; GO:0034613 cellular protein localization; GO:0042147 retrograde transport, endosome to Golgi; GO:0…	GO:0005622 intracellular anatomical structure; GO:0005737 cytoplasm; GO:0005768 endosome; GO:0012505 endomembrane system; GO:0016020 membrane; GO:0030904 retromer complex; GO:0030906 retromer, cargo-selective complex; GO:0031410 cytoplasmic vesicle; GO:0031982 vesicle; GO:0032991 protein-containing complex; GO:0043226 organelle; GO:0043227 membrane-bounded organelle; GO:0043229 intracellular orga…	GO:0005215 transporter activity;			R	KOG2717	Uncharacterized conserved protein with similarity to embryogenesis protein H beta 58 and VPS26
O14974	Protein phosphatase 1 regulatory subunit 12A OS=Homo sapiens OX=9606 GN=PPP1R12A PE=1 SV=1	PPP1R12A	1.05835	None	115.28	37.7	27	27	27	1134500	1200700	0.971651	1.02835	nucleus	K06270	PPP1R12A; protein phosphatase 1 regulatory subunit 12A	hsa04510 Focal adhesion; hsa04270 Vascular smooth muscle contraction; hsa04921 Oxytocin signaling pathway; hsa04810 Regulation of actin cytoskeleton; hsa04024 cAMP signaling pathway; hsa05205 Proteoglycans in cancer; hsa04611 Platelet activation; hsa04022 cGMP-PKG signaling pathway	GO:0000226 microtubule cytoskeleton organization; GO:0000278 mitotic cell cycle; GO:0000902 cell morphogenesis; GO:0000904 cell morphogenesis involved in differentiation; GO:0001889 liver development; GO:0002009 morphogenesis of an epithelium; GO:0003002 regionalization; GO:0003401 axis elongation; GO:0006355 regulation of transcription, DNA-templated; GO:0006357 regulation of transcription by RN…	GO:0000775 chromosome, centromeric region; GO:0000776 kinetochore; GO:0005622 intracellular anatomical structure; GO:0005634 nucleus; GO:0005654 nucleoplasm; GO:0005694 chromosome; GO:0005737 cytoplasm; GO:0005813 centrosome; GO:0005815 microtubule organizing center; GO:0005829 cytosol; GO:0005856 cytoskeleton; GO:0008287 protein serine/threonine phosphatase complex; GO:0015629 actin cytoskeleton…	GO:0003824 catalytic activity; GO:0004721 phosphoprotein phosphatase activity; GO:0004857 enzyme inhibitor activity; GO:0005488 binding; GO:0005515 protein binding; GO:0016787 hydrolase activity; GO:0016788 hydrolase activity, acting on ester bonds; GO:0016791 phosphatase activity; GO:0019208 phosphatase regulator activity; GO:0019899 enzyme binding; GO:0019900 kinase binding; GO:0019901 protein …			OT	KOG0505	Myosin phosphatase, regulatory subunit	WP4861 ENDOPLASMIC RETICULUM STRESS RESPONSE IN CORONAVIRUS INFECTION;WP306 FOCAL ADHESION;WP4541 HIPPOMERLIN SIGNALING DYSREGULATION;WP51 REGULATION OF ACTIN CYTOSKELETON	http://www.wikipathways.org/instance/WP4861_r118973;http://www.wikipathways.org/instance/WP306_r116784;http://www.wikipathways.org/instance/WP4541_r116745;http://www.wikipathways.org/instance/WP51_r116716		R-HSA-162582 Signal Transduction;R-HSA-1640170 Cell Cycle;R-HSA-194315 Signaling by Rho GTPases;R-HSA-195258 RHO GTPase Effectors;R-HSA-2565942 Regulation of PLK1 Activity at G2/M Transition;R-HSA-453274 Mitotic G2-G2/M phases;R-HSA-5625740 RHO GTPases activate PKNs;R-HSA-5625900 RHO GTPases activate CIT;R-HSA-5627117 RHO GTPases Activate ROCKs;R-HSA-5627123 RHO GTPases activate PAKs;R-HSA-69275 …	https://reactome.org/PathwayBrowser/#/R-HSA-162582;https://reactome.org/PathwayBrowser/#/R-HSA-1640170;https://reactome.org/PathwayBrowser/#/R-HSA-194315;https://reactome.org/PathwayBrowser/#/R-HSA-195258;https://reactome.org/PathwayBrowser/#/R-HSA-2565942;https://reactome.org/PathwayBrowser/#/R-HSA-453274;https://reactome.org/PathwayBrowser/#/R-HSA-5625740;https://reactome.org/PathwayBrowser/#/R…
O14975	Long-chain fatty acid transport protein 2 OS=Homo sapiens OX=9606 GN=SLC27A2 PE=1 SV=2	SLC27A2		None	70.311	5.5	2	2	2	0	0			endoplasmic reticulum	K08746	SLC27A2; solute carrier family 27 (fatty acid transporter), member 2 [EC:6.2.1.- 6.2.1.3]	hsa03320 PPAR signaling pathway; hsa04146 Peroxisome; hsa04931 Insulin resistance	GO:0000038 very long-chain fatty acid metabolic process; GO:0001561 fatty acid alpha-oxidation; GO:0001676 long-chain fatty acid metabolic process; GO:0001775 cell activation; GO:0002252 immune effector process; GO:0002263 cell activation involved in immune response; GO:0002274 myeloid leukocyte activation; GO:0002275 myeloid cell activation involved in immune response; GO:0002283 neutrophil acti…	GO:0005622 intracellular anatomical structure; GO:0005737 cytoplasm; GO:0005777 peroxisome; GO:0005778 peroxisomal membrane; GO:0005779 integral component of peroxisomal membrane; GO:0005783 endoplasmic reticulum; GO:0005788 endoplasmic reticulum lumen; GO:0005789 endoplasmic reticulum membrane; GO:0005829 cytosol; GO:0005886 plasma membrane; GO:0012505 endomembrane system; GO:0012506 vesicle mem…	GO:0003824 catalytic activity; GO:0004467 long-chain fatty acid-CoA ligase activity; GO:0005102 signaling receptor binding; GO:0005215 transporter activity; GO:0005319 lipid transporter activity; GO:0005342 organic acid transmembrane transporter activity; GO:0005488 binding; GO:0005515 protein binding; GO:0008028 monocarboxylic acid transmembrane transporter activity; GO:0008509 anion transmembra…	PF13193	PF13193 AMP-binding enzyme C-terminal domain	I	KOG1179	Very long-chain acyl-CoA synthetase/fatty acid transporter	WP5064 7OXOC AND 7BETAHC PATHWAYS;WP4545 OXYSTEROLS DERIVED FROM CHOLESTEROL;WP3942 PPAR SIGNALING PATHWAY	http://www.wikipathways.org/instance/WP5064_r120384;http://www.wikipathways.org/instance/WP4545_r120411;http://www.wikipathways.org/instance/WP3942_r106517		R-HSA-1430728 Metabolism;R-HSA-168249 Innate Immune System;R-HSA-168256 Immune System;R-HSA-192105 Synthesis of bile acids and bile salts;R-HSA-193368 Synthesis of bile acids and bile salts via 7alpha-hydroxycholesterol;R-HSA-193775 Synthesis of bile acids and bile salts via 24-hydroxycholesterol;R-HSA-194068 Bile acid and bile salt metabolism;R-HSA-389599 Alpha-oxidation of phytanate;R-HSA-39091…	https://reactome.org/PathwayBrowser/#/R-HSA-1430728;https://reactome.org/PathwayBrowser/#/R-HSA-168249;https://reactome.org/PathwayBrowser/#/R-HSA-168256;https://reactome.org/PathwayBrowser/#/R-HSA-192105;https://reactome.org/PathwayBrowser/#/R-HSA-193368;https://reactome.org/PathwayBrowser/#/R-HSA-193775;https://reactome.org/PathwayBrowser/#/R-HSA-194068;https://reactome.org/PathwayBrowser/#/R-H…	BILE ACID METABOLISM;ESTROGEN RESPONSE EARLY;ESTROGEN RESPONSE LATE;PEROXISOME	https://www.gsea-msigdb.org/gsea/msigdb/cards/HALLMARK_BILE_ACID_METABOLISM;https://www.gsea-msigdb.org/gsea/msigdb/cards/HALLMARK_ESTROGEN_RESPONSE_EARLY;https://www.gsea-msigdb.org/gsea/msigdb/cards/HALLMARK_ESTROGEN_RESPONSE_LATE;https://www.gsea-msigdb.org/gsea/msigdb/cards/HALLMARK_PEROXISOME
O14976	Cyclin-G-associated kinase OS=Homo sapiens OX=9606 GN=GAK PE=1 SV=2	GAK	1.12926	None	143.19	17.5	17	16	17	369010	416710	0.939291	1.06071	plasma membrane	K08855			GO:0000003 reproduction; GO:0001654 eye development; GO:0001745 compound eye morphogenesis; GO:0001889 liver development; GO:0003006 developmental process involved in reproduction; GO:0006457 protein folding; GO:0006458 'de novo' protein folding; GO:0006464 cellular protein modification process; GO:0006468 protein phosphorylation; GO:0006793 phosphorus metabolic process; GO:0006796 phosphate-cont…	GO:0005622 intracellular anatomical structure; GO:0005737 cytoplasm; GO:0005794 Golgi apparatus; GO:0005795 Golgi stack; GO:0005829 cytosol; GO:0012505 endomembrane system; GO:0031982 vesicle; GO:0031984 organelle subcompartment; GO:0043226 organelle; GO:0043227 membrane-bounded organelle; GO:0043229 intracellular organelle; GO:0043231 intracellular membrane-bounded organelle; GO:0098791 Golgi ap…	GO:0003824 catalytic activity; GO:0004672 protein kinase activity; GO:0004674 protein serine/threonine kinase activity; GO:0005488 binding; GO:0005515 protein binding; GO:0016301 kinase activity; GO:0016740 transferase activity; GO:0016772 transferase activity, transferring phosphorus-containing groups; GO:0016773 phosphotransferase activity, alcohol group as acceptor; GO:0030332 cyclin binding; …	PF00069; PF10409	PF00069 Protein kinase domain; PF10409 C2 domain of PTEN tumour-suppressor protein	TR	KOG2283	Clathrin coat dissociation kinase GAK/PTEN/Auxilin and related tyrosine phosphatases				R-HSA-199991 Membrane Trafficking;R-HSA-199992 trans-Golgi Network Vesicle Budding;R-HSA-432722 Golgi Associated Vesicle Biogenesis;R-HSA-5653656 Vesicle-mediated transport;R-HSA-8856828 Clathrin-mediated endocytosis	https://reactome.org/PathwayBrowser/#/R-HSA-199991;https://reactome.org/PathwayBrowser/#/R-HSA-199992;https://reactome.org/PathwayBrowser/#/R-HSA-432722;https://reactome.org/PathwayBrowser/#/R-HSA-5653656;https://reactome.org/PathwayBrowser/#/R-HSA-8856828
O14979	Heterogeneous nuclear ribonucleoprotein D-like OS=Homo sapiens OX=9606 GN=HNRNPDL PE=1 SV=3	HNRNPDL	0.920046	None	46.437	34	13	12	13	3854700	3546500	1.04164	0.958358	nucleus	K13044			GO:0006139 nucleobase-containing compound metabolic process; GO:0006396 RNA processing; GO:0006725 cellular aromatic compound metabolic process; GO:0006807 nitrogen compound metabolic process; GO:0007154 cell communication; GO:0007165 signal transduction; GO:0007166 cell surface receptor signaling pathway; GO:0008152 metabolic process; GO:0009987 cellular process; GO:0010033 response to organic s…	GO:0005622 intracellular anatomical structure; GO:0005634 nucleus; GO:0005654 nucleoplasm; GO:0005681 spliceosomal complex; GO:0005737 cytoplasm; GO:0005829 cytosol; GO:0031974 membrane-enclosed lumen; GO:0031981 nuclear lumen; GO:0032991 protein-containing complex; GO:0043226 organelle; GO:0043227 membrane-bounded organelle; GO:0043229 intracellular organelle; GO:0043231 intracellular membrane-b…	GO:0003676 nucleic acid binding; GO:0003677 DNA binding; GO:0003690 double-stranded DNA binding; GO:0003697 single-stranded DNA binding; GO:0003723 RNA binding; GO:0003727 single-stranded RNA binding; GO:0005488 binding; GO:0008143 poly(A) binding; GO:0034046 poly(G) binding; GO:0070717 poly-purine tract binding; GO:0097159 organic cyclic compound binding; GO:1901363 heterocyclic compound binding;	PF00076	PF00076 RNA recognition motif. (a.k.a. RRM, RBD, or RNP domain)	R	KOG0118	FOG: RRM domain				R-HSA-1280215 Cytokine Signaling in Immune system;R-HSA-168256 Immune System;R-HSA-447115 Interleukin-12 family signaling;R-HSA-449147 Signaling by Interleukins;R-HSA-8950505 Gene and protein expression by JAK-STAT signaling after Interleukin-12 stimulation;R-HSA-9020591 Interleukin-12 signaling	https://reactome.org/PathwayBrowser/#/R-HSA-1280215;https://reactome.org/PathwayBrowser/#/R-HSA-168256;https://reactome.org/PathwayBrowser/#/R-HSA-447115;https://reactome.org/PathwayBrowser/#/R-HSA-449147;https://reactome.org/PathwayBrowser/#/R-HSA-8950505;https://reactome.org/PathwayBrowser/#/R-HSA-9020591
O14980	Exportin-1 OS=Homo sapiens OX=9606 GN=XPO1 PE=1 SV=1	XPO1	1.00377	None	123.38	50.3	41	41	41	864420	867680	0.998118	1.00188	cytoplasm	K14290	XPO1; exportin-1	hsa03008 Ribosome biogenesis in eukaryotes; hsa03013 Nucleocytoplasmic transport; hsa03250 Viral life cycle - HIV-1; hsa05164 Influenza A; hsa05166 Human T-cell leukemia virus 1 infection	GO:0000054 ribosomal subunit export from nucleus; GO:0000055 ribosomal large subunit export from nucleus; GO:0000056 ribosomal small subunit export from nucleus; GO:0000122 negative regulation of transcription by RNA polymerase II; GO:0000226 microtubule cytoskeleton organization; GO:0006355 regulation of transcription, DNA-templated; GO:0006357 regulation of transcription by RNA polymerase II; G…	GO:0000775 chromosome, centromeric region; GO:0000776 kinetochore; GO:0005622 intracellular anatomical structure; GO:0005634 nucleus; GO:0005635 nuclear envelope; GO:0005642 annulate lamellae; GO:0005643 nuclear pore; GO:0005654 nucleoplasm; GO:0005694 chromosome; GO:0005730 nucleolus; GO:0005737 cytoplasm; GO:0005829 cytosol; GO:0012505 endomembrane system; GO:0015030 Cajal body; GO:0016020 memb…	GO:0005049 nuclear export signal receptor activity; GO:0005215 transporter activity; GO:0005488 binding; GO:0005515 protein binding; GO:0019904 protein domain specific binding; GO:0140104 molecular carrier activity; GO:0140142 nucleocytoplasmic carrier activity;			YU	KOG2020	Nuclear transport receptor CRM1/MSN5 (importin beta superfamily)	WP4657 22Q112 COPY NUMBER VARIATION SYNDROME	http://www.wikipathways.org/instance/WP4657_r120007	Transcription factor	R-HSA-141424 Amplification of signal from the kinetochores;R-HSA-141444 Amplification of signal from unattached kinetochores via a MAD2 inhibitory signal;R-HSA-162582 Signal Transduction;R-HSA-162587 HIV Life Cycle;R-HSA-162599 Late Phase of HIV Life Cycle;R-HSA-162906 HIV Infection;R-HSA-162909 Host Interactions of HIV factors;R-HSA-1640170 Cell Cycle;R-HSA-1643685 Disease;R-HSA-165054 Rev-media…		E2F TARGETS;G2M CHECKPOINT;MYC TARGETS V1	https://www.gsea-msigdb.org/gsea/msigdb/cards/HALLMARK_E2F_TARGETS;https://www.gsea-msigdb.org/gsea/msigdb/cards/HALLMARK_G2M_CHECKPOINT;https://www.gsea-msigdb.org/gsea/msigdb/cards/HALLMARK_MYC_TARGETS_V1
O14981	TATA-binding protein-associated factor 172 OS=Homo sapiens OX=9606 GN=BTAF1 PE=1 SV=2	BTAF1	1.19643	None	206.89	13.4	17	17	17	121620	145510	0.910568	1.08943	plasma membrane	K15192			GO:0006355 regulation of transcription, DNA-templated; GO:0009889 regulation of biosynthetic process; GO:0009890 negative regulation of biosynthetic process; GO:0009892 negative regulation of metabolic process; GO:0010468 regulation of gene expression; GO:0010556 regulation of macromolecule biosynthetic process; GO:0010558 negative regulation of macromolecule biosynthetic process; GO:0010605 nega…	GO:0005622 intracellular anatomical structure; GO:0005634 nucleus; GO:0005654 nucleoplasm; GO:0031974 membrane-enclosed lumen; GO:0031981 nuclear lumen; GO:0043226 organelle; GO:0043227 membrane-bounded organelle; GO:0043229 intracellular organelle; GO:0043231 intracellular membrane-bounded organelle; GO:0043233 organelle lumen; GO:0070013 intracellular organelle lumen;	GO:0003700 DNA-binding transcription factor activity; GO:0140110 transcription regulator activity;	PF00176; PF00271	PF00176 SNF2-related domain; PF00271 Helicase conserved C-terminal domain	K	KOG0392	SNF2 family DNA-dependent ATPase domain-containing protein	WP2853 ENDODERM DIFFERENTIATION	http://www.wikipathways.org/instance/WP2853_r116557	Transcription factor
O15013	Rho guanine nucleotide exchange factor 10 OS=Homo sapiens OX=9606 GN=ARHGEF10 PE=1 SV=4	ARHGEF10	1.08304	None	151.61	4.1	3	3	3	23544	25499	0.960137	1.03986	nucleus	K16727			GO:0000226 microtubule cytoskeleton organization; GO:0000278 mitotic cell cycle; GO:0000280 nuclear division; GO:0006996 organelle organization; GO:0007010 cytoskeleton organization; GO:0007017 microtubule-based process; GO:0007049 cell cycle; GO:0007051 spindle organization; GO:0007052 mitotic spindle organization; GO:0007098 centrosome cycle; GO:0007272 ensheathment of neurons; GO:0007275 multi…	GO:0005622 intracellular anatomical structure; GO:0005737 cytoplasm; GO:0005813 centrosome; GO:0005815 microtubule organizing center; GO:0005829 cytosol; GO:0005856 cytoskeleton; GO:0015630 microtubule cytoskeleton; GO:0043226 organelle; GO:0043228 non-membrane-bounded organelle; GO:0043229 intracellular organelle; GO:0043232 intracellular non-membrane-bounded organelle;	GO:0005085 guanyl-nucleotide exchange factor activity; GO:0005488 binding; GO:0005515 protein binding; GO:0008092 cytoskeletal protein binding; GO:0019894 kinesin binding; GO:0019899 enzyme binding; GO:0031267 small GTPase binding; GO:0051020 GTPase binding; GO:0098772 molecular function regulator;	PF00621; PF19057	PF00621 RhoGEF domain; PF19057 PH domain	T	KOG3522	Predicted guanine nucleotide exchange factor				R-HSA-162582 Signal Transduction;R-HSA-193648 NRAGE signals death through JNK;R-HSA-193704 p75 NTR receptor-mediated signalling;R-HSA-194315 Signaling by Rho GTPases;R-HSA-204998 Cell death signalling via NRAGE, NRIF and NADE;R-HSA-372790 Signaling by GPCR;R-HSA-388396 GPCR downstream signalling;R-HSA-416482 G alpha (12/13) signalling events;R-HSA-73887 Death Receptor Signalling;R-HSA-8980692 RHO…	https://reactome.org/PathwayBrowser/#/R-HSA-162582;https://reactome.org/PathwayBrowser/#/R-HSA-193648;https://reactome.org/PathwayBrowser/#/R-HSA-193704;https://reactome.org/PathwayBrowser/#/R-HSA-194315;https://reactome.org/PathwayBrowser/#/R-HSA-204998;https://reactome.org/PathwayBrowser/#/R-HSA-372790;https://reactome.org/PathwayBrowser/#/R-HSA-388396;https://reactome.org/PathwayBrowser/#/R-HS…
O15014	Zinc finger protein 609 OS=Homo sapiens OX=9606 GN=ZNF609 PE=1 SV=2	ZNF609		None	151.19	1.6	1	1	1	0	0			nucleus				GO:0002682 regulation of immune system process; GO:0002684 positive regulation of immune system process; GO:0002694 regulation of leukocyte activation; GO:0002696 positive regulation of leukocyte activation; GO:0006355 regulation of transcription, DNA-templated; GO:0006357 regulation of transcription by RNA polymerase II; GO:0007275 multicellular organism development; GO:0007399 nervous system de…	GO:0000428 DNA-directed RNA polymerase complex; GO:0005622 intracellular anatomical structure; GO:0005634 nucleus; GO:0005654 nucleoplasm; GO:0016591 RNA polymerase II, holoenzyme; GO:0030880 RNA polymerase complex; GO:0031974 membrane-enclosed lumen; GO:0031981 nuclear lumen; GO:0032039 integrator complex; GO:0032991 protein-containing complex; GO:0043226 organelle; GO:0043227 membrane-bounded o…
O15027	Protein transport protein Sec16A OS=Homo sapiens OX=9606 GN=SEC16A PE=1 SV=4	SEC16A	0.889724	None	251.89	15.3	18	18	18	151620	134900	1.05836	0.941645	nucleus	K20353			GO:0003400 regulation of COPII vesicle coating; GO:0006810 transport; GO:0006888 endoplasmic reticulum to Golgi vesicle-mediated transport; GO:0006900 vesicle budding from membrane; GO:0006901 vesicle coating; GO:0006903 vesicle targeting; GO:0006950 response to stress; GO:0006996 organelle organization; GO:0007029 endoplasmic reticulum organization; GO:0007030 Golgi organization; GO:0007154 cell…	GO:0005622 intracellular anatomical structure; GO:0005737 cytoplasm; GO:0005783 endoplasmic reticulum; GO:0005794 Golgi apparatus; GO:0005829 cytosol; GO:0012505 endomembrane system; GO:0016020 membrane; GO:0043226 organelle; GO:0043227 membrane-bounded organelle; GO:0043229 intracellular organelle; GO:0043231 intracellular membrane-bounded organelle; GO:0070971 endoplasmic reticulum exit site;	GO:0005488 binding; GO:0005515 protein binding; GO:0019899 enzyme binding; GO:0031267 small GTPase binding; GO:0051020 GTPase binding;	PF12932; PF12931	PF12932 Vesicle coat trafficking protein Sec16 mid-region; PF12931 Sec23-binding domain of Sec16	K	KOG1913	Regucalcin gene promoter region-related protein (RGPR)				R-HSA-199977 ER to Golgi Anterograde Transport;R-HSA-199991 Membrane Trafficking;R-HSA-204005 COPII-mediated vesicle transport;R-HSA-392499 Metabolism of proteins;R-HSA-446203 Asparagine N-linked glycosylation;R-HSA-5653656 Vesicle-mediated transport;R-HSA-597592 Post-translational protein modification;R-HSA-948021 Transport to the Golgi and subsequent modification	https://reactome.org/PathwayBrowser/#/R-HSA-199977;https://reactome.org/PathwayBrowser/#/R-HSA-199991;https://reactome.org/PathwayBrowser/#/R-HSA-204005;https://reactome.org/PathwayBrowser/#/R-HSA-392499;https://reactome.org/PathwayBrowser/#/R-HSA-446203;https://reactome.org/PathwayBrowser/#/R-HSA-5653656;https://reactome.org/PathwayBrowser/#/R-HSA-597592;https://reactome.org/PathwayBrowser/#/R-H…
O15031	Plexin-B2 OS=Homo sapiens OX=9606 GN=PLXNB2 PE=1 SV=3	PLXNB2	1.11854	None	205.12	8.8	11	11	11	470390	526150	0.944046	1.05595	plasma membrane	K06821	PLXNB; plexin B	hsa04360 Axon guidance	GO:0001838 embryonic epithelial tube formation; GO:0001841 neural tube formation; GO:0001843 neural tube closure; GO:0001932 regulation of protein phosphorylation; GO:0002009 morphogenesis of an epithelium; GO:0007154 cell communication; GO:0007155 cell adhesion; GO:0007156 homophilic cell adhesion via plasma membrane adhesion molecules; GO:0007162 negative regulation of cell adhesion; GO:0007165…	GO:0005886 plasma membrane; GO:0005887 integral component of plasma membrane; GO:0016020 membrane; GO:0016021 integral component of membrane; GO:0031224 intrinsic component of membrane; GO:0031226 intrinsic component of plasma membrane; GO:0071944 cell periphery;	GO:0004888 transmembrane signaling receptor activity; GO:0017154 semaphorin receptor activity; GO:0038023 signaling receptor activity; GO:0060089 molecular transducer activity;	PF17960; PF01833	PF17960 TIG domain; PF01833 IPT/TIG domain	T	KOG3610	Plexins (functional semaphorin receptors)						MYOGENESIS;P53 PATHWAY	https://www.gsea-msigdb.org/gsea/msigdb/cards/HALLMARK_MYOGENESIS;https://www.gsea-msigdb.org/gsea/msigdb/cards/HALLMARK_P53_PATHWAY
O15042	U2 snRNP-associated SURP motif-containing protein OS=Homo sapiens OX=9606 GN=U2SURP PE=1 SV=2	U2SURP	1.05895	None	118.29	24.2	17	17	17	412560	436880	0.971369	1.02863	nucleus	K12842	SR140; U2-associated protein SR140	hsa03040 Spliceosome	GO:0000375 RNA splicing, via transesterification reactions; GO:0000377 RNA splicing, via transesterification reactions with bulged adenosine as nucleophile; GO:0000398 mRNA splicing, via spliceosome; GO:0006139 nucleobase-containing compound metabolic process; GO:0006396 RNA processing; GO:0006397 mRNA processing; GO:0006725 cellular aromatic compound metabolic process; GO:0006807 nitrogen compou…	GO:0005622 intracellular anatomical structure; GO:0005634 nucleus; GO:0005654 nucleoplasm; GO:0031974 membrane-enclosed lumen; GO:0031981 nuclear lumen; GO:0043226 organelle; GO:0043227 membrane-bounded organelle; GO:0043229 intracellular organelle; GO:0043231 intracellular membrane-bounded organelle; GO:0043233 organelle lumen; GO:0070013 intracellular organelle lumen;	GO:0003676 nucleic acid binding; GO:0003723 RNA binding; GO:0003729 mRNA binding; GO:0005488 binding; GO:0097159 organic cyclic compound binding; GO:1901363 heterocyclic compound binding;	PF00076; PF08312	PF00076 RNA recognition motif. (a.k.a. RRM, RBD, or RNP domain); PF08312 cwf21 domain	R	KOG0151	Predicted splicing regulator, contains RRM, SWAP and RPR domains				R-HSA-72163 mRNA Splicing - Major Pathway;R-HSA-72172 mRNA Splicing;R-HSA-72203 Processing of Capped Intron-Containing Pre-mRNA;R-HSA-8953854 Metabolism of RNA	https://reactome.org/PathwayBrowser/#/R-HSA-72163;https://reactome.org/PathwayBrowser/#/R-HSA-72172;https://reactome.org/PathwayBrowser/#/R-HSA-72203;https://reactome.org/PathwayBrowser/#/R-HSA-8953854
O15056	Synaptojanin-2 OS=Homo sapiens OX=9606 GN=SYNJ2 PE=1 SV=3	SYNJ2		None	165.54	2.7	2	2	2	0	0			plasma membrane	K20279	SYNJ; synaptojanin [EC:3.1.3.36]	hsa04070 Phosphatidylinositol signaling system; hsa00562 Inositol phosphate metabolism; hsa01100 Metabolic pathways	GO:0005975 carbohydrate metabolic process; GO:0006066 alcohol metabolic process; GO:0006629 lipid metabolic process; GO:0006644 phospholipid metabolic process; GO:0006650 glycerophospholipid metabolic process; GO:0006661 phosphatidylinositol biosynthetic process; GO:0006793 phosphorus metabolic process; GO:0006796 phosphate-containing compound metabolic process; GO:0006996 organelle organization;…	GO:0001726 ruffle; GO:0005622 intracellular anatomical structure; GO:0005737 cytoplasm; GO:0005739 mitochondrion; GO:0005740 mitochondrial envelope; GO:0005741 mitochondrial outer membrane; GO:0005829 cytosol; GO:0005856 cytoskeleton; GO:0005874 microtubule; GO:0005881 cytoplasmic microtubule; GO:0005886 plasma membrane; GO:0015630 microtubule cytoskeleton; GO:0016020 membrane; GO:0019867 outer m…	GO:0003824 catalytic activity; GO:0004438 phosphatidylinositol-3-phosphatase activity; GO:0004439 phosphatidylinositol-4,5-bisphosphate 5-phosphatase activity; GO:0004445 inositol-polyphosphate 5-phosphatase activity; GO:0005488 binding; GO:0005515 protein binding; GO:0016787 hydrolase activity; GO:0016788 hydrolase activity, acting on ester bonds; GO:0016791 phosphatase activity; GO:0017124 SH3 …	PF03372; PF08952	PF03372 Endonuclease/Exonuclease/phosphatase family; PF08952 Domain of unknown function (DUF1866)	U	KOG0566	Inositol-1,4,5-triphosphate 5-phosphatase (synaptojanin), INP51/INP52/INP53 family				R-HSA-1430728 Metabolism;R-HSA-1483255 PI Metabolism;R-HSA-1483257 Phospholipid metabolism;R-HSA-1660499 Synthesis of PIPs at the plasma membrane;R-HSA-199991 Membrane Trafficking;R-HSA-556833 Metabolism of lipids;R-HSA-5653656 Vesicle-mediated transport;R-HSA-8856828 Clathrin-mediated endocytosis	https://reactome.org/PathwayBrowser/#/R-HSA-1430728;https://reactome.org/PathwayBrowser/#/R-HSA-1483255;https://reactome.org/PathwayBrowser/#/R-HSA-1483257;https://reactome.org/PathwayBrowser/#/R-HSA-1660499;https://reactome.org/PathwayBrowser/#/R-HSA-199991;https://reactome.org/PathwayBrowser/#/R-HSA-556833;https://reactome.org/PathwayBrowser/#/R-HSA-5653656;https://reactome.org/PathwayBrowser/#…	UV RESPONSE DN	https://www.gsea-msigdb.org/gsea/msigdb/cards/HALLMARK_UV_RESPONSE_DN
O15063	Granule associated Rac and RHOG effector protein 1 OS=Homo sapiens OX=9606 GN=GARRE1 PE=1 SV=2	GARRE1		None	116.02	2.1	2	2	2	0	0			nucleus															R-HSA-162582 Signal Transduction;R-HSA-194315 Signaling by Rho GTPases;R-HSA-9012999 RHO GTPase cycle;R-HSA-9013149 RAC1 GTPase cycle;R-HSA-9013404 RAC2 GTPase cycle;R-HSA-9013408 RHOG GTPase cycle;R-HSA-9013423 RAC3 GTPase cycle;R-HSA-9716542 Signaling by Rho GTPases, Miro GTPases and RHOBTB3	https://reactome.org/PathwayBrowser/#/R-HSA-162582;https://reactome.org/PathwayBrowser/#/R-HSA-194315;https://reactome.org/PathwayBrowser/#/R-HSA-9012999;https://reactome.org/PathwayBrowser/#/R-HSA-9013149;https://reactome.org/PathwayBrowser/#/R-HSA-9013404;https://reactome.org/PathwayBrowser/#/R-HSA-9013408;https://reactome.org/PathwayBrowser/#/R-HSA-9013423;https://reactome.org/PathwayBrowser/#…
O15066	Kinesin-like protein KIF3B OS=Homo sapiens OX=9606 GN=KIF3B PE=1 SV=1	KIF3B	0.794237	None	85.124	4.4	2	2	2	33179	26352	1.11468	0.88532	nucleus	K20196			GO:0000226 microtubule cytoskeleton organization; GO:0000278 mitotic cell cycle; GO:0000280 nuclear division; GO:0002376 immune system process; GO:0002478 antigen processing and presentation of exogenous peptide antigen; GO:0002495 antigen processing and presentation of peptide antigen via MHC class II; GO:0002504 antigen processing and presentation of peptide or polysaccharide antigen via MHC cl…	GO:0005622 intracellular anatomical structure; GO:0005737 cytoplasm; GO:0005813 centrosome; GO:0005815 microtubule organizing center; GO:0005819 spindle; GO:0005829 cytosol; GO:0005856 cytoskeleton; GO:0005871 kinesin complex; GO:0005873 plus-end kinesin complex; GO:0005875 microtubule associated complex; GO:0005929 cilium; GO:0005930 axoneme; GO:0015630 microtubule cytoskeleton; GO:0016939 kines…	GO:0003774 cytoskeletal motor activity; GO:0003777 microtubule motor activity; GO:0003824 catalytic activity; GO:0005488 binding; GO:0005515 protein binding; GO:0008017 microtubule binding; GO:0008092 cytoskeletal protein binding; GO:0008574 plus-end-directed microtubule motor activity; GO:0015631 tubulin binding; GO:0016462 pyrophosphatase activity; GO:0016787 hydrolase activity; GO:0016817 hydr…	PF00225	PF00225 Kinesin motor domain	Z	KOG4280	Kinesin-like protein	WP4536 GENES RELATED TO PRIMARY CILIUM DEVELOPMENT BASED ON CRISPR	http://www.wikipathways.org/instance/WP4536_r110928		R-HSA-109582 Hemostasis;R-HSA-1280218 Adaptive Immune System;R-HSA-1445148 Translocation of SLC2A4 (GLUT4) to the plasma membrane;R-HSA-168256 Immune System;R-HSA-1852241 Organelle biogenesis and maintenance;R-HSA-199991 Membrane Trafficking;R-HSA-2132295 MHC class II antigen presentation;R-HSA-5617833 Cilium Assembly;R-HSA-5620924 Intraflagellar transport;R-HSA-5653656 Vesicle-mediated transport…	https://reactome.org/PathwayBrowser/#/R-HSA-109582;https://reactome.org/PathwayBrowser/#/R-HSA-1280218;https://reactome.org/PathwayBrowser/#/R-HSA-1445148;https://reactome.org/PathwayBrowser/#/R-HSA-168256;https://reactome.org/PathwayBrowser/#/R-HSA-1852241;https://reactome.org/PathwayBrowser/#/R-HSA-199991;https://reactome.org/PathwayBrowser/#/R-HSA-2132295;https://reactome.org/PathwayBrowser/#/…	MITOTIC SPINDLE	https://www.gsea-msigdb.org/gsea/msigdb/cards/HALLMARK_MITOTIC_SPINDLE
O15067	Phosphoribosylformylglycinamidine synthase OS=Homo sapiens OX=9606 GN=PFAS PE=1 SV=4	PFAS	1.16652	None	144.73	36.1	30	30	30	673300	785420	0.923138	1.07686	nucleus	K01952	PFAS; phosphoribosylformylglycinamidine synthase [EC:6.3.5.3]	hsa00230 Purine metabolism; hsa01100 Metabolic pathways	GO:0006082 organic acid metabolic process; GO:0006139 nucleobase-containing compound metabolic process; GO:0006163 purine nucleotide metabolic process; GO:0006164 purine nucleotide biosynthetic process; GO:0006188 IMP biosynthetic process; GO:0006189 'de novo' IMP biosynthetic process; GO:0006520 cellular amino acid metabolic process; GO:0006541 glutamine metabolic process; GO:0006725 cellular ar…	GO:0005622 intracellular anatomical structure; GO:0005737 cytoplasm; GO:0005829 cytosol;	GO:0003824 catalytic activity; GO:0004642 phosphoribosylformylglycinamidine synthase activity; GO:0016874 ligase activity; GO:0016879 ligase activity, forming carbon-nitrogen bonds; GO:0016884 carbon-nitrogen ligase activity, with glutamine as amido-N-donor;	PF18076; PF18072; PF02769; PF13507	PF18076 Formylglycinamide ribonucleotide amidotransferase N-terminal; PF18072 Formylglycinamide ribonucleotide amidotransferase linker domain; PF02769 AIR synthase related protein, C-terminal domain; PF13507 CobB/CobQ-like glutamine amidotransferase domain	F	KOG1907	Phosphoribosylformylglycinamidine synthase	WP4224 PURINE METABOLISM AND RELATED DISORDERS	http://www.wikipathways.org/instance/WP4224_r120400		R-HSA-1430728 Metabolism;R-HSA-15869 Metabolism of nucleotides;R-HSA-73817 Purine ribonucleoside monophosphate biosynthesis;R-HSA-8956320 Nucleotide biosynthesis	https://reactome.org/PathwayBrowser/#/R-HSA-1430728;https://reactome.org/PathwayBrowser/#/R-HSA-15869;https://reactome.org/PathwayBrowser/#/R-HSA-73817;https://reactome.org/PathwayBrowser/#/R-HSA-8956320
O15084	Serine/threonine-protein phosphatase 6 regulatory ankyrin repeat subunit A OS=Homo sapiens OX=9606 GN=ANKRD28 PE=1 SV=5	ANKRD28	0.988606	None	112.96	20.8	14	14	14	230830	228200	1.00573	0.994271	cytoplasm	K15502			GO:0006810 transport; GO:0006888 endoplasmic reticulum to Golgi vesicle-mediated transport; GO:0006900 vesicle budding from membrane; GO:0006901 vesicle coating; GO:0006903 vesicle targeting; GO:0006996 organelle organization; GO:0009987 cellular process; GO:0016043 cellular component organization; GO:0016050 vesicle organization; GO:0016192 vesicle-mediated transport; GO:0022607 cellular compone…	GO:0005622 intracellular anatomical structure; GO:0005634 nucleus; GO:0005654 nucleoplasm; GO:0005737 cytoplasm; GO:0005829 cytosol; GO:0031974 membrane-enclosed lumen; GO:0031981 nuclear lumen; GO:0043226 organelle; GO:0043227 membrane-bounded organelle; GO:0043229 intracellular organelle; GO:0043231 intracellular membrane-bounded organelle; GO:0043233 organelle lumen; GO:0070013 intracellular o…				R	KOG0504	FOG: Ankyrin repeat				R-HSA-157579 Telomere Maintenance;R-HSA-1640170 Cell Cycle;R-HSA-171319 Telomere Extension By Telomerase;R-HSA-180786 Extension of Telomeres;R-HSA-199977 ER to Golgi Anterograde Transport;R-HSA-199991 Membrane Trafficking;R-HSA-204005 COPII-mediated vesicle transport;R-HSA-392499 Metabolism of proteins;R-HSA-446203 Asparagine N-linked glycosylation;R-HSA-5653656 Vesicle-mediated transport;R-HSA-5…	https://reactome.org/PathwayBrowser/#/R-HSA-157579;https://reactome.org/PathwayBrowser/#/R-HSA-1640170;https://reactome.org/PathwayBrowser/#/R-HSA-171319;https://reactome.org/PathwayBrowser/#/R-HSA-180786;https://reactome.org/PathwayBrowser/#/R-HSA-199977;https://reactome.org/PathwayBrowser/#/R-HSA-199991;https://reactome.org/PathwayBrowser/#/R-HSA-204005;https://reactome.org/PathwayBrowser/#/R-H…
O15091	Mitochondrial ribonuclease P catalytic subunit OS=Homo sapiens OX=9606 GN=PRORP PE=1 SV=2	PRORP	0.922295	None	67.315	12.3	5	5	5	133840	123440	1.04042	0.959577	cytoplasm	K17655			GO:0000959 mitochondrial RNA metabolic process; GO:0000963 mitochondrial RNA processing; GO:0000964 mitochondrial RNA 5'-end processing; GO:0000966 RNA 5'-end processing; GO:0001682 tRNA 5'-leader removal; GO:0006139 nucleobase-containing compound metabolic process; GO:0006396 RNA processing; GO:0006399 tRNA metabolic process; GO:0006725 cellular aromatic compound metabolic process; GO:0006807 ni…	GO:0005622 intracellular anatomical structure; GO:0005634 nucleus; GO:0005737 cytoplasm; GO:0005739 mitochondrion; GO:0005759 mitochondrial matrix; GO:0009295 nucleoid; GO:0030677 ribonuclease P complex; GO:0030678 mitochondrial ribonuclease P complex; GO:0031974 membrane-enclosed lumen; GO:0032991 protein-containing complex; GO:0042645 mitochondrial nucleoid; GO:0043226 organelle; GO:0043227 mem…	GO:0003824 catalytic activity; GO:0004518 nuclease activity; GO:0004519 endonuclease activity; GO:0004521 endoribonuclease activity; GO:0004526 ribonuclease P activity; GO:0004540 ribonuclease activity; GO:0004549 tRNA-specific ribonuclease activity; GO:0016787 hydrolase activity; GO:0016788 hydrolase activity, acting on ester bonds; GO:0016891 endoribonuclease activity, producing 5'-phosphomonoe…	PF16953	PF16953 Protein-only RNase P							R-HSA-6785470 tRNA processing in the mitochondrion;R-HSA-6787450 tRNA modification in the mitochondrion;R-HSA-72306 tRNA processing;R-HSA-72312 rRNA processing;R-HSA-8868766 rRNA processing in the mitochondrion;R-HSA-8953854 Metabolism of RNA	https://reactome.org/PathwayBrowser/#/R-HSA-6785470;https://reactome.org/PathwayBrowser/#/R-HSA-6787450;https://reactome.org/PathwayBrowser/#/R-HSA-72306;https://reactome.org/PathwayBrowser/#/R-HSA-72312;https://reactome.org/PathwayBrowser/#/R-HSA-8868766;https://reactome.org/PathwayBrowser/#/R-HSA-8953854
O15111	Inhibitor of nuclear factor kappa-B kinase subunit alpha OS=Homo sapiens OX=9606 GN=CHUK PE=1 SV=2	CHUK	1.12981	None	84.639	15.8	9	9	9	112930	127590	0.939049	1.06095	cytoplasm	K04467	IKBKA; inhibitor of nuclear factor kappa-B kinase subunit alpha [EC:2.7.11.10]	hsa05120 Epithelial cell signaling in Helicobacter pylori infection; hsa05160 Hepatitis C; hsa04014 Ras signaling pathway; hsa04622 RIG-I-like receptor signaling pathway; hsa05166 Human T-cell leukemia virus 1 infection; hsa05200 Pathways in cancer; hsa01523 Antifolate resistance; hsa04621 NOD-like receptor signaling pathway; hsa04210 Apoptosis; hsa04660 T cell receptor signaling pathway; hsa0521…	GO:0000165 MAPK cascade; GO:0000302 response to reactive oxygen species; GO:0001666 response to hypoxia; GO:0001702 gastrulation with mouth forming second; GO:0001756 somitogenesis; GO:0001757 somite specification; GO:0001817 regulation of cytokine production; GO:0001819 positive regulation of cytokine production; GO:0001959 regulation of cytokine-mediated signaling pathway; GO:0002009 morphogene…	GO:0005622 intracellular anatomical structure; GO:0005634 nucleus; GO:0005654 nucleoplasm; GO:0005737 cytoplasm; GO:0005829 cytosol; GO:0005886 plasma membrane; GO:0005887 integral component of plasma membrane; GO:0008385 IkappaB kinase complex; GO:0009898 cytoplasmic side of plasma membrane; GO:0016020 membrane; GO:0016021 integral component of membrane; GO:0031224 intrinsic component of membran…	GO:0003824 catalytic activity; GO:0004672 protein kinase activity; GO:0004674 protein serine/threonine kinase activity; GO:0005488 binding; GO:0005515 protein binding; GO:0008384 IkappaB kinase activity; GO:0016301 kinase activity; GO:0016740 transferase activity; GO:0016772 transferase activity, transferring phosphorus-containing groups; GO:0016773 phosphotransferase activity, alcohol group as a…	PF00069; PF18397; PF12179	PF00069 Protein kinase domain; PF18397 IQBAL scaffold dimerization domain; PF12179 I-kappa-kinase-beta NEMO binding domain	T	KOG4250	TANK binding protein kinase TBK1	WP2324 AGERAGE PATHWAY;WP4480 ALTERED GLYCOSYLATION OF MUC1 IN TUMOR MICROENVIRONMENT;WP5124 ALZHEIMERS DISEASE;WP2059 ALZHEIMERS DISEASE AND MIRNA EFFECTS;WP5113 ANTIVIRAL AND ANTIINFLAMMATORY EFFECTS OF NRF2 ON SARSCOV2 PATHWAY;WP254 APOPTOSIS;WP23 B CELL RECEPTOR SIGNALING PATHWAY;WP2380 BRAINDERIVED NEUROTROPHIC FACTOR BDNF SIGNALING PATHWAY;WP3845 CANONICAL AND NONCANONICAL NOTCH SIGNALING;W…			R-HSA-1168372 Downstream signaling events of B Cell Receptor (BCR);R-HSA-1169091 Activation of NF-kappaB in B cells;R-HSA-1236974 ER-Phagosome pathway;R-HSA-1236975 Antigen processing-Cross presentation;R-HSA-1257604 PIP3 activates AKT signaling;R-HSA-1280215 Cytokine Signaling in Immune system;R-HSA-1280218 Adaptive Immune System;R-HSA-1606322 ZBP1(DAI) mediated induction of type I IFNs;R-HSA-16…		ADIPOGENESIS	https://www.gsea-msigdb.org/gsea/msigdb/cards/HALLMARK_ADIPOGENESIS
O15116	U6 snRNA-associated Sm-like protein LSm1 OS=Homo sapiens OX=9606 GN=LSM1 PE=1 SV=1	LSM1		None	15.179	24.8	2	1	2	156340	304520			cytoplasm	K12620	LSM1; U6 snRNA-associated Sm-like protein LSm1	hsa03018 RNA degradation	GO:0000288 nuclear-transcribed mRNA catabolic process, deadenylation-dependent decay; GO:0000290 deadenylation-dependent decapping of nuclear-transcribed mRNA; GO:0000291 nuclear-transcribed mRNA catabolic process, exonucleolytic; GO:0000375 RNA splicing, via transesterification reactions; GO:0000377 RNA splicing, via transesterification reactions with bulged adenosine as nucleophile; GO:0000398 …	GO:0000932 P-body; GO:0005622 intracellular anatomical structure; GO:0005634 nucleus; GO:0005737 cytoplasm; GO:0005829 cytosol; GO:0005845 mRNA cap binding complex; GO:0030424 axon; GO:0030425 dendrite; GO:0032991 protein-containing complex; GO:0034518 RNA cap binding complex; GO:0035770 ribonucleoprotein granule; GO:0036464 cytoplasmic ribonucleoprotein granule; GO:0036477 somatodendritic compar…	GO:0000339 RNA cap binding; GO:0003676 nucleic acid binding; GO:0003723 RNA binding; GO:0003729 mRNA binding; GO:0005488 binding; GO:0036002 pre-mRNA binding; GO:0097159 organic cyclic compound binding; GO:1901363 heterocyclic compound binding;	PF01423	PF01423 LSM domain	A	KOG1782	Small Nuclear ribonucleoprotein splicing factor				R-HSA-429914 Deadenylation-dependent mRNA decay;R-HSA-430039 mRNA decay by 5' to 3' exoribonuclease;R-HSA-8953854 Metabolism of RNA	https://reactome.org/PathwayBrowser/#/R-HSA-429914;https://reactome.org/PathwayBrowser/#/R-HSA-430039;https://reactome.org/PathwayBrowser/#/R-HSA-8953854	UNFOLDED PROTEIN RESPONSE	https://www.gsea-msigdb.org/gsea/msigdb/cards/HALLMARK_UNFOLDED_PROTEIN_RESPONSE
O15117	FYN-binding protein 1 OS=Homo sapiens OX=9606 GN=FYB1 PE=1 SV=2	FYB1	0.943725	None	85.386	6.6	4	4	4	102390	96628	1.02895	0.971048	nucleus	K17698	FYB; FYN binding protein	hsa04015 Rap1 signaling pathway; hsa05135 Yersinia infection	GO:0002253 activation of immune response; GO:0002376 immune system process; GO:0002429 immune response-activating cell surface receptor signaling pathway; GO:0002682 regulation of immune system process; GO:0002684 positive regulation of immune system process; GO:0002757 immune response-activating signal transduction; GO:0002764 immune response-regulating signaling pathway; GO:0002768 immune respo…	GO:0005622 intracellular anatomical structure; GO:0005634 nucleus; GO:0005737 cytoplasm; GO:0005829 cytosol; GO:0005856 cytoskeleton; GO:0005886 plasma membrane; GO:0015629 actin cytoskeleton; GO:0016020 membrane; GO:0043226 organelle; GO:0043227 membrane-bounded organelle; GO:0043228 non-membrane-bounded organelle; GO:0043229 intracellular organelle; GO:0043231 intracellular membrane-bounded org…	GO:0005102 signaling receptor binding; GO:0005488 binding; GO:0005515 protein binding; GO:0044877 protein-containing complex binding;	PF07653; PF14603	PF07653 Variant SH3 domain; PF14603 Helically-extended SH3 domain				WP4542 LEUKOCYTEINTRINSIC HIPPO PATHWAY FUNCTIONS;WP69 TCELL RECEPTOR TCR SIGNALING PATHWAY	http://www.wikipathways.org/instance/WP4542_r120673;http://www.wikipathways.org/instance/WP69_r120700		R-HSA-1280218 Adaptive Immune System;R-HSA-1500931 Cell-Cell communication;R-HSA-168256 Immune System;R-HSA-202403 TCR signaling;R-HSA-202433 Generation of second messenger molecules;R-HSA-391160 Signal regulatory protein family interactions	https://reactome.org/PathwayBrowser/#/R-HSA-1280218;https://reactome.org/PathwayBrowser/#/R-HSA-1500931;https://reactome.org/PathwayBrowser/#/R-HSA-168256;https://reactome.org/PathwayBrowser/#/R-HSA-202403;https://reactome.org/PathwayBrowser/#/R-HSA-202433;https://reactome.org/PathwayBrowser/#/R-HSA-391160	ALLOGRAFT REJECTION;APICAL JUNCTION	https://www.gsea-msigdb.org/gsea/msigdb/cards/HALLMARK_ALLOGRAFT_REJECTION;https://www.gsea-msigdb.org/gsea/msigdb/cards/HALLMARK_APICAL_JUNCTION
O15118	NPC intracellular cholesterol transporter 1 OS=Homo sapiens OX=9606 GN=NPC1 PE=1 SV=2	NPC1	0.953896	None	142.17	10.3	8	8	8	176990	168830	1.0236	0.976404	plasma membrane	K12385	NPC1; Niemann-Pick C1 protein	hsa04142 Lysosome; hsa04979 Cholesterol metabolism	GO:0000003 reproduction; GO:0001700 embryonic development via the syncytial blastoderm; GO:0002009 morphogenesis of an epithelium; GO:0002119 nematode larval development; GO:0002164 larval development; GO:0002165 instar larval or pupal development; GO:0003006 developmental process involved in reproduction; GO:0003008 system process; GO:0006082 organic acid metabolic process; GO:0006464 cellular p…	GO:0000323 lytic vacuole; GO:0005576 extracellular region; GO:0005622 intracellular anatomical structure; GO:0005634 nucleus; GO:0005635 nuclear envelope; GO:0005737 cytoplasm; GO:0005764 lysosome; GO:0005765 lysosomal membrane; GO:0005768 endosome; GO:0005770 late endosome; GO:0005773 vacuole; GO:0005774 vacuolar membrane; GO:0005783 endoplasmic reticulum; GO:0005794 Golgi apparatus; GO:0005886 …	GO:0004888 transmembrane signaling receptor activity; GO:0005215 transporter activity; GO:0005319 lipid transporter activity; GO:0005488 binding; GO:0005496 steroid binding; GO:0008289 lipid binding; GO:0015248 sterol transporter activity; GO:0015485 cholesterol binding; GO:0032934 sterol binding; GO:0036094 small molecule binding; GO:0038023 signaling receptor activity; GO:0043178 alcohol bindin…	PF16414	PF16414 Niemann-Pick C1 N terminus	I	KOG1933	Cholesterol transport protein (Niemann-Pick C disease protein)	WP5064 7OXOC AND 7BETAHC PATHWAYS;WP4217 EBOLA VIRUS INFECTION IN HOST;WP229 IRINOTECAN PATHWAY	http://www.wikipathways.org/instance/WP5064_r120384;http://www.wikipathways.org/instance/WP4217_r120623;http://www.wikipathways.org/instance/WP229_r116612		R-HSA-174824 Plasma lipoprotein assembly, remodeling, and clearance;R-HSA-382551 Transport of small molecules;R-HSA-8964038 LDL clearance;R-HSA-8964043 Plasma lipoprotein clearance	https://reactome.org/PathwayBrowser/#/R-HSA-174824;https://reactome.org/PathwayBrowser/#/R-HSA-382551;https://reactome.org/PathwayBrowser/#/R-HSA-8964038;https://reactome.org/PathwayBrowser/#/R-HSA-8964043	BILE ACID METABOLISM;XENOBIOTIC METABOLISM	https://www.gsea-msigdb.org/gsea/msigdb/cards/HALLMARK_BILE_ACID_METABOLISM;https://www.gsea-msigdb.org/gsea/msigdb/cards/HALLMARK_XENOBIOTIC_METABOLISM
O15121	Sphingolipid delta(4)-desaturase DES1 OS=Homo sapiens OX=9606 GN=DEGS1 PE=1 SV=1	DEGS1	2.94457	Up	37.866	9.9	2	2	2	57876	170420	0.507026	1.49297	plasma membrane	K04712	DEGS; sphingolipid 4-desaturase/C4-monooxygenase [EC:1.14.19.17 1.14.18.5]	hsa00600 Sphingolipid metabolism; hsa04071 Sphingolipid signaling pathway; hsa01100 Metabolic pathways	GO:0000003 reproduction; GO:0000212 meiotic spindle organization; GO:0000226 microtubule cytoskeleton organization; GO:0000280 nuclear division; GO:0001775 cell activation; GO:0002252 immune effector process; GO:0002263 cell activation involved in immune response; GO:0002274 myeloid leukocyte activation; GO:0002275 myeloid cell activation involved in immune response; GO:0002283 neutrophil activat…	GO:0005622 intracellular anatomical structure; GO:0005737 cytoplasm; GO:0005739 mitochondrion; GO:0005783 endoplasmic reticulum; GO:0005789 endoplasmic reticulum membrane; GO:0005886 plasma membrane; GO:0005887 integral component of plasma membrane; GO:0012505 endomembrane system; GO:0012506 vesicle membrane; GO:0016006 Nebenkern; GO:0016020 membrane; GO:0016021 integral component of membrane; GO…	GO:0000170 sphingosine hydroxylase activity; GO:0003824 catalytic activity; GO:0009055 electron transfer activity; GO:0016491 oxidoreductase activity; GO:0016705 oxidoreductase activity, acting on paired donors, with incorporation or reduction of molecular oxygen; GO:0042284 sphingolipid delta-4 desaturase activity;	PF08557; PF00487	PF08557 Sphingolipid Delta4-desaturase (DES); PF00487 Fatty acid desaturase	I	KOG2987	Fatty acid desaturase	WP5121 SPHINGOLIPID METABOLISM IN SENESCENCE;WP4726 SPHINGOLIPID METABOLISM INTEGRATED PATHWAY;WP4725 SPHINGOLIPID METABOLISM OVERVIEW	http://www.wikipathways.org/instance/WP5121_r119472;http://www.wikipathways.org/instance/WP4726_r120323;http://www.wikipathways.org/instance/WP4725_r117175		R-HSA-1430728 Metabolism;R-HSA-1660661 Sphingolipid de novo biosynthesis;R-HSA-168249 Innate Immune System;R-HSA-168256 Immune System;R-HSA-428157 Sphingolipid metabolism;R-HSA-556833 Metabolism of lipids;R-HSA-6798695 Neutrophil degranulation	https://reactome.org/PathwayBrowser/#/R-HSA-1430728;https://reactome.org/PathwayBrowser/#/R-HSA-1660661;https://reactome.org/PathwayBrowser/#/R-HSA-168249;https://reactome.org/PathwayBrowser/#/R-HSA-168256;https://reactome.org/PathwayBrowser/#/R-HSA-428157;https://reactome.org/PathwayBrowser/#/R-HSA-556833;https://reactome.org/PathwayBrowser/#/R-HSA-6798695	ALLOGRAFT REJECTION	https://www.gsea-msigdb.org/gsea/msigdb/cards/HALLMARK_ALLOGRAFT_REJECTION
[truncated: 5,662 more rows]
