# Supplementary material for: HLA-F regulates the proliferation of trophoblast via PKM2-dependent glycolysis in the pathogenesis of preeclampsia
Source: Mol Med. 2025 Apr 18;31:142. doi: 10.1186/s10020-025-01201-w (PMC12008859; doi:10.1186/s10020-025-01201-w)
Supplement: Supplementary file 5 — Supplementary Material 5 [file 10020_2025_1201_MOESM5_ESM.xlsx]

## Sheet: Supplementary table 4-Different
Supplementary table 5-Differentially_lactylation_protein_annot
Protein accession	Position	Amino acid	JAR_OE/JAR_ctrl Ratio	Regulated Type	Protein description	Gene name	Localization probability	PEP	Score	Charge	Modified sequence	Mass error [ppm]	Intensity JAR_ctrl	Intensity JAR_OE	JAR_ctrl	JAR_OE	Subcellular localization	KEGG KO No.	KEGG Gene	KEGG pathway	Biological Process	Cellular Component	Molecular Function	Pfam ID	Domain description	KOG category	KOG NO.	KOG description	WikiPathways	externalDetailsURL	Is_TF	Reactome pathway	Reactome link	HallMark	msigdbURL
A0A096LP55	85	K		None	Cytochrome b-c1 complex subunit 6-like, mitochondrial OS=Homo sapiens OX=9606 GN=UQCRHL PE=3 SV=1	UQCRHL	1	1.27273e-12	117.45	2	DHCVAHK(1)LFNNLK	-0.39276	25240	31204			extracellular	K00416	QCR6; ubiquinol-cytochrome c reductase subunit 6	hsa04932 Non-alcoholic fatty liver disease; hsa05208 Chemical carcinogenesis - reactive oxygen species; hsa05016 Huntington disease; hsa00190 Oxidative phosphorylation; hsa05415 Diabetic cardiomyopathy; hsa05012 Parkinson disease; hsa05010 Alzheimer disease; hsa04260 Cardiac muscle contraction; hsa04714 Thermogenesis; hsa05022 Pathways of neurodegeneration - multiple diseases; hsa05014 Amyotrophi…	GO:0006091 generation of precursor metabolites and energy; GO:0006119 oxidative phosphorylation; GO:0006122 mitochondrial electron transport, ubiquinol to cytochrome c; GO:0006139 nucleobase-containing compound metabolic process; GO:0006163 purine nucleotide metabolic process; GO:0006725 cellular aromatic compound metabolic process; GO:0006753 nucleoside phosphate metabolic process; GO:0006793 ph…	GO:0005622 intracellular anatomical structure; GO:0005737 cytoplasm; GO:0005739 mitochondrion; GO:0005740 mitochondrial envelope; GO:0005743 mitochondrial inner membrane; GO:0005746 mitochondrial respirasome; GO:0005750 mitochondrial respiratory chain complex III; GO:0016020 membrane; GO:0019866 organelle inner membrane; GO:0031090 organelle membrane; GO:0031966 mitochondrial membrane; GO:0031967…	GO:0003824 catalytic activity; GO:0005488 binding; GO:0008121 ubiquinol-cytochrome-c reductase activity; GO:0009055 electron transfer activity; GO:0016491 oxidoreductase activity; GO:0016679 oxidoreductase activity, acting on diphenols and related substances as donors; GO:0044877 protein-containing complex binding;			C	KOG4763	Ubiquinol-cytochrome c reductase hinge protein	WP4396 NONALCOHOLIC FATTY LIVER DISEASE	http://www.wikipathways.org/instance/WP4396_r98945
A0A096LP55	42	K		None	Cytochrome b-c1 complex subunit 6-like, mitochondrial OS=Homo sapiens OX=9606 GN=UQCRHL PE=3 SV=1	UQCRHL	1	0.0029302	58.889	2	EQCEQLEK(1)CVK	1.3817	3843.8	5036.1			extracellular	K00416	QCR6; ubiquinol-cytochrome c reductase subunit 6	hsa04932 Non-alcoholic fatty liver disease; hsa05208 Chemical carcinogenesis - reactive oxygen species; hsa05016 Huntington disease; hsa00190 Oxidative phosphorylation; hsa05415 Diabetic cardiomyopathy; hsa05012 Parkinson disease; hsa05010 Alzheimer disease; hsa04260 Cardiac muscle contraction; hsa04714 Thermogenesis; hsa05022 Pathways of neurodegeneration - multiple diseases; hsa05014 Amyotrophi…	GO:0006091 generation of precursor metabolites and energy; GO:0006119 oxidative phosphorylation; GO:0006122 mitochondrial electron transport, ubiquinol to cytochrome c; GO:0006139 nucleobase-containing compound metabolic process; GO:0006163 purine nucleotide metabolic process; GO:0006725 cellular aromatic compound metabolic process; GO:0006753 nucleoside phosphate metabolic process; GO:0006793 ph…	GO:0005622 intracellular anatomical structure; GO:0005737 cytoplasm; GO:0005739 mitochondrion; GO:0005740 mitochondrial envelope; GO:0005743 mitochondrial inner membrane; GO:0005746 mitochondrial respirasome; GO:0005750 mitochondrial respiratory chain complex III; GO:0016020 membrane; GO:0019866 organelle inner membrane; GO:0031090 organelle membrane; GO:0031966 mitochondrial membrane; GO:0031967…	GO:0003824 catalytic activity; GO:0005488 binding; GO:0008121 ubiquinol-cytochrome-c reductase activity; GO:0009055 electron transfer activity; GO:0016491 oxidoreductase activity; GO:0016679 oxidoreductase activity, acting on diphenols and related substances as donors; GO:0044877 protein-containing complex binding;			C	KOG4763	Ubiquinol-cytochrome c reductase hinge protein	WP4396 NONALCOHOLIC FATTY LIVER DISEASE	http://www.wikipathways.org/instance/WP4396_r98945
A0MZ66	392	K		None	Shootin-1 OS=Homo sapiens OX=9606 GN=SHTN1 PE=1 SV=4	SHTN1	1	0.000105643	81.908	2	EK(1)ATQPETTEEVTDLK	-4.1676	0	10510		1.06974	nucleus				GO:0000902 cell morphogenesis; GO:0000904 cell morphogenesis involved in differentiation; GO:0001558 regulation of cell growth; GO:0006928 movement of cell or subcellular component; GO:0006929 substrate-dependent cell migration; GO:0006930 substrate-dependent cell migration, cell extension; GO:0006996 organelle organization; GO:0007010 cytoskeleton organization; GO:0007015 actin filament organiza…	GO:0005622 intracellular anatomical structure; GO:0005737 cytoplasm; GO:0005829 cytosol; GO:0005856 cytoskeleton; GO:0005874 microtubule; GO:0005875 microtubule associated complex; GO:0015630 microtubule cytoskeleton; GO:0030027 lamellipodium; GO:0030175 filopodium; GO:0030424 axon; GO:0030426 growth cone; GO:0030427 site of polarized growth; GO:0031252 cell leading edge; GO:0032991 protein-conta…	GO:0003779 actin binding; GO:0005488 binding; GO:0005515 protein binding; GO:0008092 cytoskeletal protein binding; GO:0019894 kinesin binding; GO:0044877 protein-containing complex binding; GO:0050839 cell adhesion molecule binding; GO:0051015 actin filament binding;									R-HSA-1266738 Developmental Biology;R-HSA-373760 L1CAM interactions;R-HSA-422475 Axon guidance;R-HSA-437239 Recycling pathway of L1;R-HSA-9675108 Nervous system development	https://reactome.org/PathwayBrowser/#/R-HSA-1266738;https://reactome.org/PathwayBrowser/#/R-HSA-373760;https://reactome.org/PathwayBrowser/#/R-HSA-422475;https://reactome.org/PathwayBrowser/#/R-HSA-437239;https://reactome.org/PathwayBrowser/#/R-HSA-9675108
A0MZ66	568	K		None	Shootin-1 OS=Homo sapiens OX=9606 GN=SHTN1 PE=1 SV=4	SHTN1	1	0.00915319	69.905	2	K(1)YIDGEK	-2.9908	0	39202		1.06974	nucleus				GO:0000902 cell morphogenesis; GO:0000904 cell morphogenesis involved in differentiation; GO:0001558 regulation of cell growth; GO:0006928 movement of cell or subcellular component; GO:0006929 substrate-dependent cell migration; GO:0006930 substrate-dependent cell migration, cell extension; GO:0006996 organelle organization; GO:0007010 cytoskeleton organization; GO:0007015 actin filament organiza…	GO:0005622 intracellular anatomical structure; GO:0005737 cytoplasm; GO:0005829 cytosol; GO:0005856 cytoskeleton; GO:0005874 microtubule; GO:0005875 microtubule associated complex; GO:0015630 microtubule cytoskeleton; GO:0030027 lamellipodium; GO:0030175 filopodium; GO:0030424 axon; GO:0030426 growth cone; GO:0030427 site of polarized growth; GO:0031252 cell leading edge; GO:0032991 protein-conta…	GO:0003779 actin binding; GO:0005488 binding; GO:0005515 protein binding; GO:0008092 cytoskeletal protein binding; GO:0019894 kinesin binding; GO:0044877 protein-containing complex binding; GO:0050839 cell adhesion molecule binding; GO:0051015 actin filament binding;									R-HSA-1266738 Developmental Biology;R-HSA-373760 L1CAM interactions;R-HSA-422475 Axon guidance;R-HSA-437239 Recycling pathway of L1;R-HSA-9675108 Nervous system development	https://reactome.org/PathwayBrowser/#/R-HSA-1266738;https://reactome.org/PathwayBrowser/#/R-HSA-373760;https://reactome.org/PathwayBrowser/#/R-HSA-422475;https://reactome.org/PathwayBrowser/#/R-HSA-437239;https://reactome.org/PathwayBrowser/#/R-HSA-9675108
A0MZ66	518	K	1.18818	None	Shootin-1 OS=Homo sapiens OX=9606 GN=SHTN1 PE=1 SV=4	SHTN1	1	7.46117e-07	95.345	2	SMPVLGSVSSVTK(1)TALNK	-2.0169	39969	41677	0.919156	1.09212	nucleus				GO:0000902 cell morphogenesis; GO:0000904 cell morphogenesis involved in differentiation; GO:0001558 regulation of cell growth; GO:0006928 movement of cell or subcellular component; GO:0006929 substrate-dependent cell migration; GO:0006930 substrate-dependent cell migration, cell extension; GO:0006996 organelle organization; GO:0007010 cytoskeleton organization; GO:0007015 actin filament organiza…	GO:0005622 intracellular anatomical structure; GO:0005737 cytoplasm; GO:0005829 cytosol; GO:0005856 cytoskeleton; GO:0005874 microtubule; GO:0005875 microtubule associated complex; GO:0015630 microtubule cytoskeleton; GO:0030027 lamellipodium; GO:0030175 filopodium; GO:0030424 axon; GO:0030426 growth cone; GO:0030427 site of polarized growth; GO:0031252 cell leading edge; GO:0032991 protein-conta…	GO:0003779 actin binding; GO:0005488 binding; GO:0005515 protein binding; GO:0008092 cytoskeletal protein binding; GO:0019894 kinesin binding; GO:0044877 protein-containing complex binding; GO:0050839 cell adhesion molecule binding; GO:0051015 actin filament binding;									R-HSA-1266738 Developmental Biology;R-HSA-373760 L1CAM interactions;R-HSA-422475 Axon guidance;R-HSA-437239 Recycling pathway of L1;R-HSA-9675108 Nervous system development	https://reactome.org/PathwayBrowser/#/R-HSA-1266738;https://reactome.org/PathwayBrowser/#/R-HSA-373760;https://reactome.org/PathwayBrowser/#/R-HSA-422475;https://reactome.org/PathwayBrowser/#/R-HSA-437239;https://reactome.org/PathwayBrowser/#/R-HSA-9675108
A1X283	838	K		None	SH3 and PX domain-containing protein 2B OS=Homo sapiens OX=9606 GN=SH3PXD2B PE=1 SV=3	SH3PXD2B	1	0.000218163	75.5	2	EK(1)AAAASVPNADGLK	0.85566	0	12919		0.970464	mitochondria	K24032			GO:0000003 reproduction; GO:0001501 skeletal system development; GO:0001503 ossification; GO:0001649 osteoblast differentiation; GO:0001654 eye development; GO:0002051 osteoblast fate commitment; GO:0006801 superoxide metabolic process; GO:0006996 organelle organization; GO:0007275 multicellular organism development; GO:0007423 sensory organ development; GO:0007507 heart development; GO:0008104 p…	GO:0002102 podosome; GO:0005622 intracellular anatomical structure; GO:0005737 cytoplasm; GO:0005856 cytoskeleton; GO:0015629 actin cytoskeleton; GO:0032991 protein-containing complex; GO:0043226 organelle; GO:0043228 non-membrane-bounded organelle; GO:0043229 intracellular organelle; GO:0043232 intracellular non-membrane-bounded organelle;	GO:0005488 binding; GO:0005515 protein binding; GO:0005543 phospholipid binding; GO:0008047 enzyme activator activity; GO:0008289 lipid binding; GO:0010314 phosphatidylinositol-5-phosphate binding; GO:0016176 superoxide-generating NADPH oxidase activator activity; GO:0019904 protein domain specific binding; GO:0030234 enzyme regulator activity; GO:0032266 phosphatidylinositol-3-phosphate binding;…	PF00787; PF00018; PF07653	PF00787 PX domain; PF00018 SH3 domain; PF07653 Variant SH3 domain	T	KOG0905	Phosphoinositide 3-kinase
A1X283	531	K		None	SH3 and PX domain-containing protein 2B OS=Homo sapiens OX=9606 GN=SH3PXD2B PE=1 SV=3	SH3PXD2B	1	5.99521e-06	78.157	2	ESIIK(1)SEGELLER	-0.33523	5543.2	0	1.03139		mitochondria	K24032			GO:0000003 reproduction; GO:0001501 skeletal system development; GO:0001503 ossification; GO:0001649 osteoblast differentiation; GO:0001654 eye development; GO:0002051 osteoblast fate commitment; GO:0006801 superoxide metabolic process; GO:0006996 organelle organization; GO:0007275 multicellular organism development; GO:0007423 sensory organ development; GO:0007507 heart development; GO:0008104 p…	GO:0002102 podosome; GO:0005622 intracellular anatomical structure; GO:0005737 cytoplasm; GO:0005856 cytoskeleton; GO:0015629 actin cytoskeleton; GO:0032991 protein-containing complex; GO:0043226 organelle; GO:0043228 non-membrane-bounded organelle; GO:0043229 intracellular organelle; GO:0043232 intracellular non-membrane-bounded organelle;	GO:0005488 binding; GO:0005515 protein binding; GO:0005543 phospholipid binding; GO:0008047 enzyme activator activity; GO:0008289 lipid binding; GO:0010314 phosphatidylinositol-5-phosphate binding; GO:0016176 superoxide-generating NADPH oxidase activator activity; GO:0019904 protein domain specific binding; GO:0030234 enzyme regulator activity; GO:0032266 phosphatidylinositol-3-phosphate binding;…	PF00787; PF00018; PF07653	PF00787 PX domain; PF00018 SH3 domain; PF07653 Variant SH3 domain	T	KOG0905	Phosphoinositide 3-kinase
A1X283	831	K	1.64213	Up	SH3 and PX domain-containing protein 2B OS=Homo sapiens OX=9606 GN=SH3PXD2B PE=1 SV=3	SH3PXD2B	1	9.31242e-21	153.52	2	GSLGPWGTGK(1)IGENR	-0.13524	34329	59912	0.751406	1.23391	mitochondria	K24032			GO:0000003 reproduction; GO:0001501 skeletal system development; GO:0001503 ossification; GO:0001649 osteoblast differentiation; GO:0001654 eye development; GO:0002051 osteoblast fate commitment; GO:0006801 superoxide metabolic process; GO:0006996 organelle organization; GO:0007275 multicellular organism development; GO:0007423 sensory organ development; GO:0007507 heart development; GO:0008104 p…	GO:0002102 podosome; GO:0005622 intracellular anatomical structure; GO:0005737 cytoplasm; GO:0005856 cytoskeleton; GO:0015629 actin cytoskeleton; GO:0032991 protein-containing complex; GO:0043226 organelle; GO:0043228 non-membrane-bounded organelle; GO:0043229 intracellular organelle; GO:0043232 intracellular non-membrane-bounded organelle;	GO:0005488 binding; GO:0005515 protein binding; GO:0005543 phospholipid binding; GO:0008047 enzyme activator activity; GO:0008289 lipid binding; GO:0010314 phosphatidylinositol-5-phosphate binding; GO:0016176 superoxide-generating NADPH oxidase activator activity; GO:0019904 protein domain specific binding; GO:0030234 enzyme regulator activity; GO:0032266 phosphatidylinositol-3-phosphate binding;…	PF00787; PF00018; PF07653	PF00787 PX domain; PF00018 SH3 domain; PF07653 Variant SH3 domain	T	KOG0905	Phosphoinositide 3-kinase
A1X283	619	K		None	SH3 and PX domain-containing protein 2B OS=Homo sapiens OX=9606 GN=SH3PXD2B PE=1 SV=3	SH3PXD2B	0.999997	1.18864e-06	72.075	3	SK(1)TDLPEEKPDATPQNPFLK	-0.56532	0	52204		0.970464	mitochondria	K24032			GO:0000003 reproduction; GO:0001501 skeletal system development; GO:0001503 ossification; GO:0001649 osteoblast differentiation; GO:0001654 eye development; GO:0002051 osteoblast fate commitment; GO:0006801 superoxide metabolic process; GO:0006996 organelle organization; GO:0007275 multicellular organism development; GO:0007423 sensory organ development; GO:0007507 heart development; GO:0008104 p…	GO:0002102 podosome; GO:0005622 intracellular anatomical structure; GO:0005737 cytoplasm; GO:0005856 cytoskeleton; GO:0015629 actin cytoskeleton; GO:0032991 protein-containing complex; GO:0043226 organelle; GO:0043228 non-membrane-bounded organelle; GO:0043229 intracellular organelle; GO:0043232 intracellular non-membrane-bounded organelle;	GO:0005488 binding; GO:0005515 protein binding; GO:0005543 phospholipid binding; GO:0008047 enzyme activator activity; GO:0008289 lipid binding; GO:0010314 phosphatidylinositol-5-phosphate binding; GO:0016176 superoxide-generating NADPH oxidase activator activity; GO:0019904 protein domain specific binding; GO:0030234 enzyme regulator activity; GO:0032266 phosphatidylinositol-3-phosphate binding;…	PF00787; PF00018; PF07653	PF00787 PX domain; PF00018 SH3 domain; PF07653 Variant SH3 domain	T	KOG0905	Phosphoinositide 3-kinase
A1X283	637	K	2.11194	Up	SH3 and PX domain-containing protein 2B OS=Homo sapiens OX=9606 GN=SH3PXD2B PE=1 SV=3	SH3PXD2B	0.999999	2.5534e-10	66.913	3	TDLPEEKPDATPQNPFLK(1)SR	1.6779	22005	49391	0.635771	1.34271	mitochondria	K24032			GO:0000003 reproduction; GO:0001501 skeletal system development; GO:0001503 ossification; GO:0001649 osteoblast differentiation; GO:0001654 eye development; GO:0002051 osteoblast fate commitment; GO:0006801 superoxide metabolic process; GO:0006996 organelle organization; GO:0007275 multicellular organism development; GO:0007423 sensory organ development; GO:0007507 heart development; GO:0008104 p…	GO:0002102 podosome; GO:0005622 intracellular anatomical structure; GO:0005737 cytoplasm; GO:0005856 cytoskeleton; GO:0015629 actin cytoskeleton; GO:0032991 protein-containing complex; GO:0043226 organelle; GO:0043228 non-membrane-bounded organelle; GO:0043229 intracellular organelle; GO:0043232 intracellular non-membrane-bounded organelle;	GO:0005488 binding; GO:0005515 protein binding; GO:0005543 phospholipid binding; GO:0008047 enzyme activator activity; GO:0008289 lipid binding; GO:0010314 phosphatidylinositol-5-phosphate binding; GO:0016176 superoxide-generating NADPH oxidase activator activity; GO:0019904 protein domain specific binding; GO:0030234 enzyme regulator activity; GO:0032266 phosphatidylinositol-3-phosphate binding;…	PF00787; PF00018; PF07653	PF00787 PX domain; PF00018 SH3 domain; PF07653 Variant SH3 domain	T	KOG0905	Phosphoinositide 3-kinase
A1X283	741	K	1.17297	None	SH3 and PX domain-containing protein 2B OS=Homo sapiens OX=9606 GN=SH3PXD2B PE=1 SV=3	SH3PXD2B	1	3.3886e-10	109.16	2	TTDPVSK(1)SVPVPLQEAPQQR	-1.2417	52391	65311	0.918176	1.07699	mitochondria	K24032			GO:0000003 reproduction; GO:0001501 skeletal system development; GO:0001503 ossification; GO:0001649 osteoblast differentiation; GO:0001654 eye development; GO:0002051 osteoblast fate commitment; GO:0006801 superoxide metabolic process; GO:0006996 organelle organization; GO:0007275 multicellular organism development; GO:0007423 sensory organ development; GO:0007507 heart development; GO:0008104 p…	GO:0002102 podosome; GO:0005622 intracellular anatomical structure; GO:0005737 cytoplasm; GO:0005856 cytoskeleton; GO:0015629 actin cytoskeleton; GO:0032991 protein-containing complex; GO:0043226 organelle; GO:0043228 non-membrane-bounded organelle; GO:0043229 intracellular organelle; GO:0043232 intracellular non-membrane-bounded organelle;	GO:0005488 binding; GO:0005515 protein binding; GO:0005543 phospholipid binding; GO:0008047 enzyme activator activity; GO:0008289 lipid binding; GO:0010314 phosphatidylinositol-5-phosphate binding; GO:0016176 superoxide-generating NADPH oxidase activator activity; GO:0019904 protein domain specific binding; GO:0030234 enzyme regulator activity; GO:0032266 phosphatidylinositol-3-phosphate binding;…	PF00787; PF00018; PF07653	PF00787 PX domain; PF00018 SH3 domain; PF07653 Variant SH3 domain	T	KOG0905	Phosphoinositide 3-kinase
A3KN83	159	K		None	Protein strawberry notch homolog 1 OS=Homo sapiens OX=9606 GN=SBNO1 PE=1 SV=1	SBNO1	1	1.69159e-12	101.64	2	DLLK(1)NNSLNELMK	-1.0763	0	13833		0.863987	nucleus				GO:0001775 cell activation; GO:0002237 response to molecule of bacterial origin; GO:0002252 immune effector process; GO:0002263 cell activation involved in immune response; GO:0002274 myeloid leukocyte activation; GO:0002275 myeloid cell activation involved in immune response; GO:0002281 macrophage activation involved in immune response; GO:0002366 leukocyte activation involved in immune response…			PF13872; PF13871	PF13872 P-loop containing NTP hydrolase pore-1; PF13871 C-terminal domain on Strawberry notch homologue	KT	KOG1513	Nuclear helicase MOP-3/SNO (DEAD-box superfamily)
A3KN83	155	K		None	Protein strawberry notch homolog 1 OS=Homo sapiens OX=9606 GN=SBNO1 PE=1 SV=1	SBNO1	1	4.00043e-05	99.34	2	DQVQLK(1)DLLK	-1.8477	0	22725		0.863987	nucleus				GO:0001775 cell activation; GO:0002237 response to molecule of bacterial origin; GO:0002252 immune effector process; GO:0002263 cell activation involved in immune response; GO:0002274 myeloid leukocyte activation; GO:0002275 myeloid cell activation involved in immune response; GO:0002281 macrophage activation involved in immune response; GO:0002366 leukocyte activation involved in immune response…			PF13872; PF13871	PF13872 P-loop containing NTP hydrolase pore-1; PF13871 C-terminal domain on Strawberry notch homologue	KT	KOG1513	Nuclear helicase MOP-3/SNO (DEAD-box superfamily)
A3KN83	708	K		None	Protein strawberry notch homolog 1 OS=Homo sapiens OX=9606 GN=SBNO1 PE=1 SV=1	SBNO1	1	0.0189726	58.426	2	K(1)GEEITR	-0.10521	0	13190		0.863987	nucleus				GO:0001775 cell activation; GO:0002237 response to molecule of bacterial origin; GO:0002252 immune effector process; GO:0002263 cell activation involved in immune response; GO:0002274 myeloid leukocyte activation; GO:0002275 myeloid cell activation involved in immune response; GO:0002281 macrophage activation involved in immune response; GO:0002366 leukocyte activation involved in immune response…			PF13872; PF13871	PF13872 P-loop containing NTP hydrolase pore-1; PF13871 C-terminal domain on Strawberry notch homologue	KT	KOG1513	Nuclear helicase MOP-3/SNO (DEAD-box superfamily)
A3KN83	218	K		None	Protein strawberry notch homolog 1 OS=Homo sapiens OX=9606 GN=SBNO1 PE=1 SV=1	SBNO1	1	0.0010054	64.064	2	SFSPTMK(1)VPVVK	2.5226	0	13263		0.863987	nucleus				GO:0001775 cell activation; GO:0002237 response to molecule of bacterial origin; GO:0002252 immune effector process; GO:0002263 cell activation involved in immune response; GO:0002274 myeloid leukocyte activation; GO:0002275 myeloid cell activation involved in immune response; GO:0002281 macrophage activation involved in immune response; GO:0002366 leukocyte activation involved in immune response…			PF13872; PF13871	PF13872 P-loop containing NTP hydrolase pore-1; PF13871 C-terminal domain on Strawberry notch homologue	KT	KOG1513	Nuclear helicase MOP-3/SNO (DEAD-box superfamily)
A4D161	288	K		None	Protein FAM221A OS=Homo sapiens OX=9606 GN=FAM221A PE=1 SV=1	FAM221A	0.999906	0.0283203	43.168	2	GK(1)APLPSATKPS	0.69188	0	19003			nucleus
A5YKK6	808	K	1.15318	None	CCR4-NOT transcription complex subunit 1 OS=Homo sapiens OX=9606 GN=CNOT1 PE=1 SV=2	CNOT1	1	2.26793e-09	131.06	2	K(1)LGTSGLNQPTFQQSK	-1.4911	42088	55182	0.924644	1.06628	cytoplasm	K12604	CNOT1; CCR4-NOT transcription complex subunit 1	hsa03018 RNA degradation	GO:0000003 reproduction; GO:0000075 cell cycle checkpoint signaling; GO:0000077 DNA damage checkpoint signaling; GO:0000122 negative regulation of transcription by RNA polymerase II; GO:0000226 microtubule cytoskeleton organization; GO:0000278 mitotic cell cycle; GO:0000288 nuclear-transcribed mRNA catabolic process, deadenylation-dependent decay; GO:0000289 nuclear-transcribed mRNA poly(A) tail …	GO:0000932 P-body; GO:0005622 intracellular anatomical structure; GO:0005737 cytoplasm; GO:0005829 cytosol; GO:0030014 CCR4-NOT complex; GO:0030015 CCR4-NOT core complex; GO:0032991 protein-containing complex; GO:0035770 ribonucleoprotein granule; GO:0036464 cytoplasmic ribonucleoprotein granule; GO:0043226 organelle; GO:0043228 non-membrane-bounded organelle; GO:0043229 intracellular organelle; …	GO:0000175 3'-5'-exoribonuclease activity; GO:0003824 catalytic activity; GO:0004518 nuclease activity; GO:0004527 exonuclease activity; GO:0004532 exoribonuclease activity; GO:0004535 poly(A)-specific ribonuclease activity; GO:0004540 ribonuclease activity; GO:0005102 signaling receptor binding; GO:0005198 structural molecule activity; GO:0005488 binding; GO:0005515 protein binding; GO:0008134 t…	PF16418; PF16417; PF16415; PF12842	PF16418 CCR4-NOT transcription complex subunit 1 HEAT repeat; PF16417 CCR4-NOT transcription complex subunit 1 TTP binding domain; PF16415 CCR4-NOT transcription complex subunit 1 CAF1-binding domain; PF12842 CCR4-Not complex, Not1 subunit, domain of unknown function DUF3819	K	KOG1831	Negative regulator of transcription	WP4352 CILIARY LANDSCAPE	http://www.wikipathways.org/instance/WP4352_r102218		R-HSA-212436 Generic Transcription Pathway;R-HSA-3700989 Transcriptional Regulation by TP53;R-HSA-429914 Deadenylation-dependent mRNA decay;R-HSA-429947 Deadenylation of mRNA;R-HSA-6791312 TP53 Regulates Transcription of Cell Cycle Genes;R-HSA-6804115 TP53 regulates transcription of additional cell cycle genes whose exact role in the p53 pathway remain uncertain;R-HSA-73857 RNA Polymerase II Tran…	https://reactome.org/PathwayBrowser/#/R-HSA-212436;https://reactome.org/PathwayBrowser/#/R-HSA-3700989;https://reactome.org/PathwayBrowser/#/R-HSA-429914;https://reactome.org/PathwayBrowser/#/R-HSA-429947;https://reactome.org/PathwayBrowser/#/R-HSA-6791312;https://reactome.org/PathwayBrowser/#/R-HSA-6804115;https://reactome.org/PathwayBrowser/#/R-HSA-73857;https://reactome.org/PathwayBrowser/#/R-…
A5YKK6	823	K	1.68669	Up	CCR4-NOT transcription complex subunit 1 OS=Homo sapiens OX=9606 GN=CNOT1 PE=1 SV=2	CNOT1	1	2.68974e-09	91.993	2	LGTSGLNQPTFQQSK(1)MK	-0.45627	11529	22109	0.732414	1.23535	cytoplasm	K12604	CNOT1; CCR4-NOT transcription complex subunit 1	hsa03018 RNA degradation	GO:0000003 reproduction; GO:0000075 cell cycle checkpoint signaling; GO:0000077 DNA damage checkpoint signaling; GO:0000122 negative regulation of transcription by RNA polymerase II; GO:0000226 microtubule cytoskeleton organization; GO:0000278 mitotic cell cycle; GO:0000288 nuclear-transcribed mRNA catabolic process, deadenylation-dependent decay; GO:0000289 nuclear-transcribed mRNA poly(A) tail …	GO:0000932 P-body; GO:0005622 intracellular anatomical structure; GO:0005737 cytoplasm; GO:0005829 cytosol; GO:0030014 CCR4-NOT complex; GO:0030015 CCR4-NOT core complex; GO:0032991 protein-containing complex; GO:0035770 ribonucleoprotein granule; GO:0036464 cytoplasmic ribonucleoprotein granule; GO:0043226 organelle; GO:0043228 non-membrane-bounded organelle; GO:0043229 intracellular organelle; …	GO:0000175 3'-5'-exoribonuclease activity; GO:0003824 catalytic activity; GO:0004518 nuclease activity; GO:0004527 exonuclease activity; GO:0004532 exoribonuclease activity; GO:0004535 poly(A)-specific ribonuclease activity; GO:0004540 ribonuclease activity; GO:0005102 signaling receptor binding; GO:0005198 structural molecule activity; GO:0005488 binding; GO:0005515 protein binding; GO:0008134 t…	PF16418; PF16417; PF16415; PF12842	PF16418 CCR4-NOT transcription complex subunit 1 HEAT repeat; PF16417 CCR4-NOT transcription complex subunit 1 TTP binding domain; PF16415 CCR4-NOT transcription complex subunit 1 CAF1-binding domain; PF12842 CCR4-Not complex, Not1 subunit, domain of unknown function DUF3819	K	KOG1831	Negative regulator of transcription	WP4352 CILIARY LANDSCAPE	http://www.wikipathways.org/instance/WP4352_r102218		R-HSA-212436 Generic Transcription Pathway;R-HSA-3700989 Transcriptional Regulation by TP53;R-HSA-429914 Deadenylation-dependent mRNA decay;R-HSA-429947 Deadenylation of mRNA;R-HSA-6791312 TP53 Regulates Transcription of Cell Cycle Genes;R-HSA-6804115 TP53 regulates transcription of additional cell cycle genes whose exact role in the p53 pathway remain uncertain;R-HSA-73857 RNA Polymerase II Tran…	https://reactome.org/PathwayBrowser/#/R-HSA-212436;https://reactome.org/PathwayBrowser/#/R-HSA-3700989;https://reactome.org/PathwayBrowser/#/R-HSA-429914;https://reactome.org/PathwayBrowser/#/R-HSA-429947;https://reactome.org/PathwayBrowser/#/R-HSA-6791312;https://reactome.org/PathwayBrowser/#/R-HSA-6804115;https://reactome.org/PathwayBrowser/#/R-HSA-73857;https://reactome.org/PathwayBrowser/#/R-…
A5YKK6	1063	K		None	CCR4-NOT transcription complex subunit 1 OS=Homo sapiens OX=9606 GN=CNOT1 PE=1 SV=2	CNOT1	1	0.0313533	73.891	2	TVTVTRPTGVSFK(1)K	1.2317	12578	0	1.06848		cytoplasm	K12604	CNOT1; CCR4-NOT transcription complex subunit 1	hsa03018 RNA degradation	GO:0000003 reproduction; GO:0000075 cell cycle checkpoint signaling; GO:0000077 DNA damage checkpoint signaling; GO:0000122 negative regulation of transcription by RNA polymerase II; GO:0000226 microtubule cytoskeleton organization; GO:0000278 mitotic cell cycle; GO:0000288 nuclear-transcribed mRNA catabolic process, deadenylation-dependent decay; GO:0000289 nuclear-transcribed mRNA poly(A) tail …	GO:0000932 P-body; GO:0005622 intracellular anatomical structure; GO:0005737 cytoplasm; GO:0005829 cytosol; GO:0030014 CCR4-NOT complex; GO:0030015 CCR4-NOT core complex; GO:0032991 protein-containing complex; GO:0035770 ribonucleoprotein granule; GO:0036464 cytoplasmic ribonucleoprotein granule; GO:0043226 organelle; GO:0043228 non-membrane-bounded organelle; GO:0043229 intracellular organelle; …	GO:0000175 3'-5'-exoribonuclease activity; GO:0003824 catalytic activity; GO:0004518 nuclease activity; GO:0004527 exonuclease activity; GO:0004532 exoribonuclease activity; GO:0004535 poly(A)-specific ribonuclease activity; GO:0004540 ribonuclease activity; GO:0005102 signaling receptor binding; GO:0005198 structural molecule activity; GO:0005488 binding; GO:0005515 protein binding; GO:0008134 t…	PF16418; PF16417; PF16415; PF12842	PF16418 CCR4-NOT transcription complex subunit 1 HEAT repeat; PF16417 CCR4-NOT transcription complex subunit 1 TTP binding domain; PF16415 CCR4-NOT transcription complex subunit 1 CAF1-binding domain; PF12842 CCR4-Not complex, Not1 subunit, domain of unknown function DUF3819	K	KOG1831	Negative regulator of transcription	WP4352 CILIARY LANDSCAPE	http://www.wikipathways.org/instance/WP4352_r102218		R-HSA-212436 Generic Transcription Pathway;R-HSA-3700989 Transcriptional Regulation by TP53;R-HSA-429914 Deadenylation-dependent mRNA decay;R-HSA-429947 Deadenylation of mRNA;R-HSA-6791312 TP53 Regulates Transcription of Cell Cycle Genes;R-HSA-6804115 TP53 regulates transcription of additional cell cycle genes whose exact role in the p53 pathway remain uncertain;R-HSA-73857 RNA Polymerase II Tran…	https://reactome.org/PathwayBrowser/#/R-HSA-212436;https://reactome.org/PathwayBrowser/#/R-HSA-3700989;https://reactome.org/PathwayBrowser/#/R-HSA-429914;https://reactome.org/PathwayBrowser/#/R-HSA-429947;https://reactome.org/PathwayBrowser/#/R-HSA-6791312;https://reactome.org/PathwayBrowser/#/R-HSA-6804115;https://reactome.org/PathwayBrowser/#/R-HSA-73857;https://reactome.org/PathwayBrowser/#/R-…
A6NF01	91	K		None	Putative nuclear envelope pore membrane protein POM 121B OS=Homo sapiens OX=9606 GN=POM121B PE=5 SV=2	POM121B	1	0.0020217	74.486	2	K(1)VQLLPSR	-0.19324	37092	57333			nucleus				GO:0006403 RNA localization; GO:0006405 RNA export from nucleus; GO:0006406 mRNA export from nucleus; GO:0006606 protein import into nucleus; GO:0006611 protein export from nucleus; GO:0006810 transport; GO:0006886 intracellular protein transport; GO:0006913 nucleocytoplasmic transport; GO:0006996 organelle organization; GO:0006997 nucleus organization; GO:0006999 nuclear pore organization; GO:00…	GO:0005622 intracellular anatomical structure; GO:0005634 nucleus; GO:0005635 nuclear envelope; GO:0005643 nuclear pore; GO:0005654 nucleoplasm; GO:0012505 endomembrane system; GO:0016020 membrane; GO:0031090 organelle membrane; GO:0031965 nuclear membrane; GO:0031967 organelle envelope; GO:0031974 membrane-enclosed lumen; GO:0031975 envelope; GO:0031981 nuclear lumen; GO:0032991 protein-containi…	GO:0005048 signal sequence binding; GO:0005198 structural molecule activity; GO:0005488 binding; GO:0008139 nuclear localization sequence binding; GO:0017056 structural constituent of nuclear pore; GO:0033218 amide binding; GO:0042277 peptide binding;
P30046	33	K	0.773736	None	D-dopachrome decarboxylase OS=Homo sapiens OX=9606 GN=DDT PE=1 SV=3	DDT	1	3.99448e-14	138.71	2	LCAAAASILGK(1)PADR	-1.4931	21999	20796	1.1421	0.883688	cytoplasm	K10028			GO:0001817 regulation of cytokine production; GO:0001819 positive regulation of cytokine production; GO:0001932 regulation of protein phosphorylation; GO:0001934 positive regulation of protein phosphorylation; GO:0002682 regulation of immune system process; GO:0002683 negative regulation of immune system process; GO:0002685 regulation of leukocyte migration; GO:0002686 negative regulation of leuk…	GO:0005576 extracellular region; GO:0005615 extracellular space; GO:0005622 intracellular anatomical structure; GO:0005737 cytoplasm;	GO:0002020 protease binding; GO:0003824 catalytic activity; GO:0004167 dopachrome isomerase activity; GO:0005102 signaling receptor binding; GO:0005126 cytokine receptor binding; GO:0005488 binding; GO:0005515 protein binding; GO:0016853 isomerase activity; GO:0016860 intramolecular oxidoreductase activity; GO:0016862 intramolecular oxidoreductase activity, interconverting keto- and enol-groups; …	PF01187	PF01187 Macrophage migration inhibitory factor (MIF)	V	KOG1759	Macrophage migration inhibitory factor						ADIPOGENESIS;XENOBIOTIC METABOLISM	https://www.gsea-msigdb.org/gsea/msigdb/cards/HALLMARK_ADIPOGENESIS;https://www.gsea-msigdb.org/gsea/msigdb/cards/HALLMARK_XENOBIOTIC_METABOLISM
A6NHR9	771	K	0.832076	None	Structural maintenance of chromosomes flexible hinge domain-containing protein 1 OS=Homo sapiens OX=9606 GN=SMCHD1 PE=1 SV=2	SMCHD1	1	1.1693e-14	118.26	3	EIISHISQHGGK(1)WPYWFK	-1.0196	213530	171120	1.08978	0.906781	cytoplasm	K23113			GO:0007275 multicellular organism development; GO:0007423 sensory organ development; GO:0007549 dosage compensation; GO:0009048 dosage compensation by inactivation of X chromosome; GO:0010468 regulation of gene expression; GO:0019222 regulation of metabolic process; GO:0032501 multicellular organismal process; GO:0032502 developmental process; GO:0040029 regulation of gene expression, epigenetic;…	GO:0000228 nuclear chromosome; GO:0000803 sex chromosome; GO:0000805 X chromosome; GO:0001740 Barr body; GO:0005622 intracellular anatomical structure; GO:0005634 nucleus; GO:0005694 chromosome; GO:0031974 membrane-enclosed lumen; GO:0031981 nuclear lumen; GO:0043226 organelle; GO:0043227 membrane-bounded organelle; GO:0043228 non-membrane-bounded organelle; GO:0043229 intracellular organelle; GO…	GO:0003824 catalytic activity; GO:0016462 pyrophosphatase activity; GO:0016787 hydrolase activity; GO:0016817 hydrolase activity, acting on acid anhydrides; GO:0016818 hydrolase activity, acting on acid anhydrides, in phosphorus-containing anhydrides; GO:0016887 ATP hydrolysis activity; GO:0017111 nucleoside-triphosphatase activity;	PF13589; PF06470	PF13589 Histidine kinase-, DNA gyrase B-, and HSP90-like ATPase; PF06470 SMC proteins Flexible Hinge Domain						Transcription factor
A6NHR9	1987	K		None	Structural maintenance of chromosomes flexible hinge domain-containing protein 1 OS=Homo sapiens OX=9606 GN=SMCHD1 PE=1 SV=2	SMCHD1	1	6.01909e-13	126.29	2	VETTDCPVPPK(1)R	2.1421	358060	0	0.981558		cytoplasm	K23113			GO:0007275 multicellular organism development; GO:0007423 sensory organ development; GO:0007549 dosage compensation; GO:0009048 dosage compensation by inactivation of X chromosome; GO:0010468 regulation of gene expression; GO:0019222 regulation of metabolic process; GO:0032501 multicellular organismal process; GO:0032502 developmental process; GO:0040029 regulation of gene expression, epigenetic;…	GO:0000228 nuclear chromosome; GO:0000803 sex chromosome; GO:0000805 X chromosome; GO:0001740 Barr body; GO:0005622 intracellular anatomical structure; GO:0005634 nucleus; GO:0005694 chromosome; GO:0031974 membrane-enclosed lumen; GO:0031981 nuclear lumen; GO:0043226 organelle; GO:0043227 membrane-bounded organelle; GO:0043228 non-membrane-bounded organelle; GO:0043229 intracellular organelle; GO…	GO:0003824 catalytic activity; GO:0016462 pyrophosphatase activity; GO:0016787 hydrolase activity; GO:0016817 hydrolase activity, acting on acid anhydrides; GO:0016818 hydrolase activity, acting on acid anhydrides, in phosphorus-containing anhydrides; GO:0016887 ATP hydrolysis activity; GO:0017111 nucleoside-triphosphatase activity;	PF13589; PF06470	PF13589 Histidine kinase-, DNA gyrase B-, and HSP90-like ATPase; PF06470 SMC proteins Flexible Hinge Domain						Transcription factor
A6NMB9	323	K		None	Fidgetin-like protein 2 OS=Homo sapiens OX=9606 GN=FIGNL2 PE=2 SV=2	FIGNL2	0.999584	0.00658056	42.218	3	AKPPGAAEEASGK(1)YGGGVPLK	-2.4139	0	7165.9			cytoplasm,nucleus							PF00004	PF00004 ATPase family associated with various cellular activities (AAA)	O	KOG0740	AAA+-type ATPase
A6NMB9	280	K		None	Fidgetin-like protein 2 OS=Homo sapiens OX=9606 GN=FIGNL2 PE=2 SV=2	FIGNL2	1	0.00925949	45.489	2	K(1)YAYEPAK	1.0679	15221	33588			cytoplasm,nucleus							PF00004	PF00004 ATPase family associated with various cellular activities (AAA)	O	KOG0740	AAA+-type ATPase
P12883	1756	K		None	Myosin-7 OS=Homo sapiens OX=9606 GN=MYH7 PE=1 SV=5	MYH7	0.880972	0.0214368	42.446	3	AK(0.881)K(0.119)AITDAAMMAEELKK	1.4529	0	46954			cytoplasm	K17751	MYH6_7; myosin heavy chain 6/7	hsa04260 Cardiac muscle contraction; hsa05410 Hypertrophic cardiomyopathy; hsa05416 Viral myocarditis; hsa05414 Dilated cardiomyopathy; hsa04919 Thyroid hormone signaling pathway; hsa04261 Adrenergic signaling in cardiomyocytes; hsa04022 cGMP-PKG signaling pathway	GO:0001101 response to acid chemical; GO:0001701 in utero embryonic development; GO:0002026 regulation of the force of heart contraction; GO:0002027 regulation of heart rate; GO:0003007 heart morphogenesis; GO:0003008 system process; GO:0003009 skeletal muscle contraction; GO:0003012 muscle system process; GO:0003013 circulatory system process; GO:0003015 heart process; GO:0003205 cardiac chamber…	GO:0001725 stress fiber; GO:0005622 intracellular anatomical structure; GO:0005737 cytoplasm; GO:0005829 cytosol; GO:0005856 cytoskeleton; GO:0005859 muscle myosin complex; GO:0015629 actin cytoskeleton; GO:0016459 myosin complex; GO:0016460 myosin II complex; GO:0030016 myofibril; GO:0030017 sarcomere; GO:0030018 Z disc; GO:0031674 I band; GO:0032432 actin filament bundle; GO:0032982 myosin fila…	GO:0000146 microfilament motor activity; GO:0000166 nucleotide binding; GO:0003676 nucleic acid binding; GO:0003723 RNA binding; GO:0003725 double-stranded RNA binding; GO:0003774 cytoskeletal motor activity; GO:0003779 actin binding; GO:0003824 catalytic activity; GO:0004721 phosphoprotein phosphatase activity; GO:0004722 protein serine/threonine phosphatase activity; GO:0005198 structural molec…	PF02736; PF00063	PF02736 Myosin N-terminal SH3-like domain; PF00063 Myosin head (motor domain)	Z	KOG0161	Myosin class II heavy chain	WP4754 IL18 SIGNALING PATHWAY	http://www.wikipathways.org/instance/WP4754_r115147				KRAS SIGNALING DN;MYOGENESIS	https://www.gsea-msigdb.org/gsea/msigdb/cards/HALLMARK_KRAS_SIGNALING_DN;https://www.gsea-msigdb.org/gsea/msigdb/cards/HALLMARK_MYOGENESIS
A8MPP1	154	K		None	Putative ATP-dependent RNA helicase DDX11-like protein 8 OS=Homo sapiens OX=9606 GN=DDX11L8 PE=1 SV=1	DDX11L8	1	0.0366772	46.835	2	VQLK(1)YAAK	1.0496	34947	0			cytoplasm				GO:0000819 sister chromatid segregation; GO:0006139 nucleobase-containing compound metabolic process; GO:0006259 DNA metabolic process; GO:0006260 DNA replication; GO:0006261 DNA-dependent DNA replication; GO:0006282 regulation of DNA repair; GO:0006325 chromatin organization; GO:0006351 transcription, DNA-templated; GO:0006355 regulation of transcription, DNA-templated; GO:0006356 regulation of …	GO:0000228 nuclear chromosome; GO:0000785 chromatin; GO:0000922 spindle pole; GO:0001650 fibrillar center; GO:0005576 extracellular region; GO:0005615 extracellular space; GO:0005622 intracellular anatomical structure; GO:0005634 nucleus; GO:0005654 nucleoplasm; GO:0005694 chromosome; GO:0005730 nucleolus; GO:0005813 centrosome; GO:0005815 microtubule organizing center; GO:0005819 spindle; GO:000…	GO:0003676 nucleic acid binding; GO:0003677 DNA binding; GO:0003678 DNA helicase activity; GO:0003682 chromatin binding; GO:0003688 DNA replication origin binding; GO:0003690 double-stranded DNA binding; GO:0003697 single-stranded DNA binding; GO:0003723 RNA binding; GO:0003727 single-stranded RNA binding; GO:0003824 catalytic activity; GO:0004386 helicase activity; GO:0005488 binding; GO:0008094…	PF13307	PF13307 Helicase C-terminal domain	L	KOG1133	Helicase of the DEAD superfamily
A8MV65	124	K		None	Transcription cofactor vestigial-like protein 3 OS=Homo sapiens OX=9606 GN=VGLL3 PE=1 SV=1	VGLL3	1	3.17349e-06	63.79	2	ALGQAITLHPESAISK(1)SK	-1.5828	26646	0			nucleus					GO:0005622 intracellular anatomical structure; GO:0005634 nucleus; GO:0043226 organelle; GO:0043227 membrane-bounded organelle; GO:0043229 intracellular organelle; GO:0043231 intracellular membrane-bounded organelle;	GO:0005488 binding; GO:0005515 protein binding; GO:0008022 protein C-terminus binding;
A8MV65	126	K		None	Transcription cofactor vestigial-like protein 3 OS=Homo sapiens OX=9606 GN=VGLL3 PE=1 SV=1	VGLL3	1	0.00423412	54.584	2	SK(1)MGLTPLWR	0.63932	26782	0			nucleus					GO:0005622 intracellular anatomical structure; GO:0005634 nucleus; GO:0043226 organelle; GO:0043227 membrane-bounded organelle; GO:0043229 intracellular organelle; GO:0043231 intracellular membrane-bounded organelle;	GO:0005488 binding; GO:0005515 protein binding; GO:0008022 protein C-terminus binding;
A8MW92	280	K		None	PHD finger protein 20-like protein 1 OS=Homo sapiens OX=9606 GN=PHF20L1 PE=1 SV=2	PHF20L1	1	0.00153466	94.804	2	LNK(1)ITGLLASK	-2.6248	168430	0			nucleus	K18402						PF02820; PF18104	PF02820 mbt repeat; PF18104 Jumonji domain-containing protein 2A Tudor domain	R	KOG1844	PHD Zn-finger proteins
A8MW92	262	K		None	PHD finger protein 20-like protein 1 OS=Homo sapiens OX=9606 GN=PHF20L1 PE=1 SV=2	PHF20L1	1	0.00148531	44.598	2	MVFPQPESTLSNK(1)R	-0.034689	0	6843.6			nucleus	K18402						PF02820; PF18104	PF02820 mbt repeat; PF18104 Jumonji domain-containing protein 2A Tudor domain	R	KOG1844	PHD Zn-finger proteins
P62308	3	K		None	Small nuclear ribonucleoprotein G OS=Homo sapiens OX=9606 GN=SNRPG PE=1 SV=1	SNRPG	1	0.0358281	43.272	2	SK(1)AHPPELK	0.94952	0	260430		1.15689	cytoplasm	K11099	SNRPG; small nuclear ribonucleoprotein G	hsa03040 Spliceosome	GO:0000245 spliceosomal complex assembly; GO:0000375 RNA splicing, via transesterification reactions; GO:0000377 RNA splicing, via transesterification reactions with bulged adenosine as nucleophile; GO:0000387 spliceosomal snRNP assembly; GO:0000398 mRNA splicing, via spliceosome; GO:0006139 nucleobase-containing compound metabolic process; GO:0006351 transcription, DNA-templated; GO:0006353 DNA-…	GO:0005622 intracellular anatomical structure; GO:0005634 nucleus; GO:0005654 nucleoplasm; GO:0005681 spliceosomal complex; GO:0005682 U5 snRNP; GO:0005683 U7 snRNP; GO:0005684 U2-type spliceosomal complex; GO:0005685 U1 snRNP; GO:0005686 U2 snRNP; GO:0005687 U4 snRNP; GO:0005689 U12-type spliceosomal complex; GO:0005737 cytoplasm; GO:0005829 cytosol; GO:0030532 small nuclear ribonucleoprotein co…	GO:0003676 nucleic acid binding; GO:0003723 RNA binding; GO:0005488 binding; GO:0043021 ribonucleoprotein complex binding; GO:0044877 protein-containing complex binding; GO:0070990 snRNP binding; GO:0097159 organic cyclic compound binding; GO:1901363 heterocyclic compound binding; GO:1990446 U1 snRNP binding;	PF01423	PF01423 LSM domain	A	KOG1780	Small Nuclear ribonucleoprotein G	WP411 MRNA PROCESSING	http://www.wikipathways.org/instance/WP411_r117160		R-HSA-111367 SLBP independent Processing of Histone Pre-mRNAs;R-HSA-1643685 Disease;R-HSA-191859 snRNP Assembly;R-HSA-194441 Metabolism of non-coding RNA;R-HSA-5663205 Infectious disease;R-HSA-72163 mRNA Splicing - Major Pathway;R-HSA-72165 mRNA Splicing - Minor Pathway;R-HSA-72172 mRNA Splicing;R-HSA-72203 Processing of Capped Intron-Containing Pre-mRNA;R-HSA-73856 RNA Polymerase II Transcriptio…	https://reactome.org/PathwayBrowser/#/R-HSA-111367;https://reactome.org/PathwayBrowser/#/R-HSA-1643685;https://reactome.org/PathwayBrowser/#/R-HSA-191859;https://reactome.org/PathwayBrowser/#/R-HSA-194441;https://reactome.org/PathwayBrowser/#/R-HSA-5663205;https://reactome.org/PathwayBrowser/#/R-HSA-72163;https://reactome.org/PathwayBrowser/#/R-HSA-72165;https://reactome.org/PathwayBrowser/#/R-HS…	MYC TARGETS V1	https://www.gsea-msigdb.org/gsea/msigdb/cards/HALLMARK_MYC_TARGETS_V1
Q99613	643	K	0.898193	None	Eukaryotic translation initiation factor 3 subunit C OS=Homo sapiens OX=9606 GN=EIF3C PE=1 SV=1	EIF3C	1	0.00306278	51.872	2	AK(1)ELLGQGLLLR	-7.344	6457.3	6015.2	1.05466	0.947292	nucleus	K03252			GO:0006412 translation; GO:0006413 translational initiation; GO:0006417 regulation of translation; GO:0006518 peptide metabolic process; GO:0006807 nitrogen compound metabolic process; GO:0008152 metabolic process; GO:0009058 biosynthetic process; GO:0009059 macromolecule biosynthetic process; GO:0009889 regulation of biosynthetic process; GO:0009891 positive regulation of biosynthetic process; G…	GO:0005622 intracellular anatomical structure; GO:0005737 cytoplasm; GO:0005829 cytosol; GO:0005852 eukaryotic translation initiation factor 3 complex; GO:0032991 protein-containing complex; GO:0071541 eukaryotic translation initiation factor 3 complex, eIF3m;	GO:0003676 nucleic acid binding; GO:0003723 RNA binding; GO:0003743 translation initiation factor activity; GO:0005488 binding; GO:0005515 protein binding; GO:0008135 translation factor activity, RNA binding; GO:0031369 translation initiation factor binding; GO:0043021 ribonucleoprotein complex binding; GO:0043022 ribosome binding; GO:0044877 protein-containing complex binding; GO:0097159 organic…	PF01399	PF01399 PCI domain	J	KOG1076	Translation initiation factor 3, subunit c (eIF-3c)	WP5027 NSP1 FROM SARSCOV2 INHIBITS TRANSLATION INITIATION IN THE HOST CELL;WP107 TRANSLATION FACTORS	http://www.wikipathways.org/instance/WP5027_r120060;http://www.wikipathways.org/instance/WP107_r117851		R-HSA-156827 L13a-mediated translational silencing of Ceruloplasmin expression;R-HSA-392499 Metabolism of proteins;R-HSA-72613 Eukaryotic Translation Initiation;R-HSA-72649 Translation initiation complex formation;R-HSA-72662 Activation of the mRNA upon binding of the cap-binding complex and eIFs, and subsequent binding to 43S;R-HSA-72689 Formation of a pool of free 40S subunits;R-HSA-72695 Forma…	https://reactome.org/PathwayBrowser/#/R-HSA-156827;https://reactome.org/PathwayBrowser/#/R-HSA-392499;https://reactome.org/PathwayBrowser/#/R-HSA-72613;https://reactome.org/PathwayBrowser/#/R-HSA-72649;https://reactome.org/PathwayBrowser/#/R-HSA-72662;https://reactome.org/PathwayBrowser/#/R-HSA-72689;https://reactome.org/PathwayBrowser/#/R-HSA-72695;https://reactome.org/PathwayBrowser/#/R-HSA-727…
Q99613	331	K		None	Eukaryotic translation initiation factor 3 subunit C OS=Homo sapiens OX=9606 GN=EIF3C PE=1 SV=1	EIF3C	1	0.00223011	61.48	2	GTEITHAVVIK(1)K	1.1399	2844.9	0	1.01856		nucleus	K03252			GO:0006412 translation; GO:0006413 translational initiation; GO:0006417 regulation of translation; GO:0006518 peptide metabolic process; GO:0006807 nitrogen compound metabolic process; GO:0008152 metabolic process; GO:0009058 biosynthetic process; GO:0009059 macromolecule biosynthetic process; GO:0009889 regulation of biosynthetic process; GO:0009891 positive regulation of biosynthetic process; G…	GO:0005622 intracellular anatomical structure; GO:0005737 cytoplasm; GO:0005829 cytosol; GO:0005852 eukaryotic translation initiation factor 3 complex; GO:0032991 protein-containing complex; GO:0071541 eukaryotic translation initiation factor 3 complex, eIF3m;	GO:0003676 nucleic acid binding; GO:0003723 RNA binding; GO:0003743 translation initiation factor activity; GO:0005488 binding; GO:0005515 protein binding; GO:0008135 translation factor activity, RNA binding; GO:0031369 translation initiation factor binding; GO:0043021 ribonucleoprotein complex binding; GO:0043022 ribosome binding; GO:0044877 protein-containing complex binding; GO:0097159 organic…	PF01399	PF01399 PCI domain	J	KOG1076	Translation initiation factor 3, subunit c (eIF-3c)	WP5027 NSP1 FROM SARSCOV2 INHIBITS TRANSLATION INITIATION IN THE HOST CELL;WP107 TRANSLATION FACTORS	http://www.wikipathways.org/instance/WP5027_r120060;http://www.wikipathways.org/instance/WP107_r117851		R-HSA-156827 L13a-mediated translational silencing of Ceruloplasmin expression;R-HSA-392499 Metabolism of proteins;R-HSA-72613 Eukaryotic Translation Initiation;R-HSA-72649 Translation initiation complex formation;R-HSA-72662 Activation of the mRNA upon binding of the cap-binding complex and eIFs, and subsequent binding to 43S;R-HSA-72689 Formation of a pool of free 40S subunits;R-HSA-72695 Forma…	https://reactome.org/PathwayBrowser/#/R-HSA-156827;https://reactome.org/PathwayBrowser/#/R-HSA-392499;https://reactome.org/PathwayBrowser/#/R-HSA-72613;https://reactome.org/PathwayBrowser/#/R-HSA-72649;https://reactome.org/PathwayBrowser/#/R-HSA-72662;https://reactome.org/PathwayBrowser/#/R-HSA-72689;https://reactome.org/PathwayBrowser/#/R-HSA-72695;https://reactome.org/PathwayBrowser/#/R-HSA-727…
Q99613	894	K	0.798102	None	Eukaryotic translation initiation factor 3 subunit C OS=Homo sapiens OX=9606 GN=EIF3C PE=1 SV=1	EIF3C	1	0.0117542	84.699	2	K(1)NEGYMR	0.039892	126080	104360	1.11456	0.889536	nucleus	K03252			GO:0006412 translation; GO:0006413 translational initiation; GO:0006417 regulation of translation; GO:0006518 peptide metabolic process; GO:0006807 nitrogen compound metabolic process; GO:0008152 metabolic process; GO:0009058 biosynthetic process; GO:0009059 macromolecule biosynthetic process; GO:0009889 regulation of biosynthetic process; GO:0009891 positive regulation of biosynthetic process; G…	GO:0005622 intracellular anatomical structure; GO:0005737 cytoplasm; GO:0005829 cytosol; GO:0005852 eukaryotic translation initiation factor 3 complex; GO:0032991 protein-containing complex; GO:0071541 eukaryotic translation initiation factor 3 complex, eIF3m;	GO:0003676 nucleic acid binding; GO:0003723 RNA binding; GO:0003743 translation initiation factor activity; GO:0005488 binding; GO:0005515 protein binding; GO:0008135 translation factor activity, RNA binding; GO:0031369 translation initiation factor binding; GO:0043021 ribonucleoprotein complex binding; GO:0043022 ribosome binding; GO:0044877 protein-containing complex binding; GO:0097159 organic…	PF01399	PF01399 PCI domain	J	KOG1076	Translation initiation factor 3, subunit c (eIF-3c)	WP5027 NSP1 FROM SARSCOV2 INHIBITS TRANSLATION INITIATION IN THE HOST CELL;WP107 TRANSLATION FACTORS	http://www.wikipathways.org/instance/WP5027_r120060;http://www.wikipathways.org/instance/WP107_r117851		R-HSA-156827 L13a-mediated translational silencing of Ceruloplasmin expression;R-HSA-392499 Metabolism of proteins;R-HSA-72613 Eukaryotic Translation Initiation;R-HSA-72649 Translation initiation complex formation;R-HSA-72662 Activation of the mRNA upon binding of the cap-binding complex and eIFs, and subsequent binding to 43S;R-HSA-72689 Formation of a pool of free 40S subunits;R-HSA-72695 Forma…	https://reactome.org/PathwayBrowser/#/R-HSA-156827;https://reactome.org/PathwayBrowser/#/R-HSA-392499;https://reactome.org/PathwayBrowser/#/R-HSA-72613;https://reactome.org/PathwayBrowser/#/R-HSA-72649;https://reactome.org/PathwayBrowser/#/R-HSA-72662;https://reactome.org/PathwayBrowser/#/R-HSA-72689;https://reactome.org/PathwayBrowser/#/R-HSA-72695;https://reactome.org/PathwayBrowser/#/R-HSA-727…
Q99613	320	K	1.61267	Up	Eukaryotic translation initiation factor 3 subunit C OS=Homo sapiens OX=9606 GN=EIF3C PE=1 SV=1	EIF3C	1	4.84342e-20	130.65	2	MFAK(1)GTEITHAVVIK	-2.3289	34971	58490	0.762245	1.22925	nucleus	K03252			GO:0006412 translation; GO:0006413 translational initiation; GO:0006417 regulation of translation; GO:0006518 peptide metabolic process; GO:0006807 nitrogen compound metabolic process; GO:0008152 metabolic process; GO:0009058 biosynthetic process; GO:0009059 macromolecule biosynthetic process; GO:0009889 regulation of biosynthetic process; GO:0009891 positive regulation of biosynthetic process; G…	GO:0005622 intracellular anatomical structure; GO:0005737 cytoplasm; GO:0005829 cytosol; GO:0005852 eukaryotic translation initiation factor 3 complex; GO:0032991 protein-containing complex; GO:0071541 eukaryotic translation initiation factor 3 complex, eIF3m;	GO:0003676 nucleic acid binding; GO:0003723 RNA binding; GO:0003743 translation initiation factor activity; GO:0005488 binding; GO:0005515 protein binding; GO:0008135 translation factor activity, RNA binding; GO:0031369 translation initiation factor binding; GO:0043021 ribonucleoprotein complex binding; GO:0043022 ribosome binding; GO:0044877 protein-containing complex binding; GO:0097159 organic…	PF01399	PF01399 PCI domain	J	KOG1076	Translation initiation factor 3, subunit c (eIF-3c)	WP5027 NSP1 FROM SARSCOV2 INHIBITS TRANSLATION INITIATION IN THE HOST CELL;WP107 TRANSLATION FACTORS	http://www.wikipathways.org/instance/WP5027_r120060;http://www.wikipathways.org/instance/WP107_r117851		R-HSA-156827 L13a-mediated translational silencing of Ceruloplasmin expression;R-HSA-392499 Metabolism of proteins;R-HSA-72613 Eukaryotic Translation Initiation;R-HSA-72649 Translation initiation complex formation;R-HSA-72662 Activation of the mRNA upon binding of the cap-binding complex and eIFs, and subsequent binding to 43S;R-HSA-72689 Formation of a pool of free 40S subunits;R-HSA-72695 Forma…	https://reactome.org/PathwayBrowser/#/R-HSA-156827;https://reactome.org/PathwayBrowser/#/R-HSA-392499;https://reactome.org/PathwayBrowser/#/R-HSA-72613;https://reactome.org/PathwayBrowser/#/R-HSA-72649;https://reactome.org/PathwayBrowser/#/R-HSA-72662;https://reactome.org/PathwayBrowser/#/R-HSA-72689;https://reactome.org/PathwayBrowser/#/R-HSA-72695;https://reactome.org/PathwayBrowser/#/R-HSA-727…
Q99613	712	K	2.14675	Up	Eukaryotic translation initiation factor 3 subunit C OS=Homo sapiens OX=9606 GN=EIF3C PE=1 SV=1	EIF3C	1	0.000333556	72.038	3	MISK(1)QFHHQLR	-0.47939	6712.5	14945	0.631383	1.35542	nucleus	K03252			GO:0006412 translation; GO:0006413 translational initiation; GO:0006417 regulation of translation; GO:0006518 peptide metabolic process; GO:0006807 nitrogen compound metabolic process; GO:0008152 metabolic process; GO:0009058 biosynthetic process; GO:0009059 macromolecule biosynthetic process; GO:0009889 regulation of biosynthetic process; GO:0009891 positive regulation of biosynthetic process; G…	GO:0005622 intracellular anatomical structure; GO:0005737 cytoplasm; GO:0005829 cytosol; GO:0005852 eukaryotic translation initiation factor 3 complex; GO:0032991 protein-containing complex; GO:0071541 eukaryotic translation initiation factor 3 complex, eIF3m;	GO:0003676 nucleic acid binding; GO:0003723 RNA binding; GO:0003743 translation initiation factor activity; GO:0005488 binding; GO:0005515 protein binding; GO:0008135 translation factor activity, RNA binding; GO:0031369 translation initiation factor binding; GO:0043021 ribonucleoprotein complex binding; GO:0043022 ribosome binding; GO:0044877 protein-containing complex binding; GO:0097159 organic…	PF01399	PF01399 PCI domain	J	KOG1076	Translation initiation factor 3, subunit c (eIF-3c)	WP5027 NSP1 FROM SARSCOV2 INHIBITS TRANSLATION INITIATION IN THE HOST CELL;WP107 TRANSLATION FACTORS	http://www.wikipathways.org/instance/WP5027_r120060;http://www.wikipathways.org/instance/WP107_r117851		R-HSA-156827 L13a-mediated translational silencing of Ceruloplasmin expression;R-HSA-392499 Metabolism of proteins;R-HSA-72613 Eukaryotic Translation Initiation;R-HSA-72649 Translation initiation complex formation;R-HSA-72662 Activation of the mRNA upon binding of the cap-binding complex and eIFs, and subsequent binding to 43S;R-HSA-72689 Formation of a pool of free 40S subunits;R-HSA-72695 Forma…	https://reactome.org/PathwayBrowser/#/R-HSA-156827;https://reactome.org/PathwayBrowser/#/R-HSA-392499;https://reactome.org/PathwayBrowser/#/R-HSA-72613;https://reactome.org/PathwayBrowser/#/R-HSA-72649;https://reactome.org/PathwayBrowser/#/R-HSA-72662;https://reactome.org/PathwayBrowser/#/R-HSA-72689;https://reactome.org/PathwayBrowser/#/R-HSA-72695;https://reactome.org/PathwayBrowser/#/R-HSA-727…
Q99613	877	K		None	Eukaryotic translation initiation factor 3 subunit C OS=Homo sapiens OX=9606 GN=EIF3C PE=1 SV=1	EIF3C	1	0.000156129	73.655	3	VFDHK(1)QGTYGGYFR	-1.1371	0	8346.1		0.982104	nucleus	K03252			GO:0006412 translation; GO:0006413 translational initiation; GO:0006417 regulation of translation; GO:0006518 peptide metabolic process; GO:0006807 nitrogen compound metabolic process; GO:0008152 metabolic process; GO:0009058 biosynthetic process; GO:0009059 macromolecule biosynthetic process; GO:0009889 regulation of biosynthetic process; GO:0009891 positive regulation of biosynthetic process; G…	GO:0005622 intracellular anatomical structure; GO:0005737 cytoplasm; GO:0005829 cytosol; GO:0005852 eukaryotic translation initiation factor 3 complex; GO:0032991 protein-containing complex; GO:0071541 eukaryotic translation initiation factor 3 complex, eIF3m;	GO:0003676 nucleic acid binding; GO:0003723 RNA binding; GO:0003743 translation initiation factor activity; GO:0005488 binding; GO:0005515 protein binding; GO:0008135 translation factor activity, RNA binding; GO:0031369 translation initiation factor binding; GO:0043021 ribonucleoprotein complex binding; GO:0043022 ribosome binding; GO:0044877 protein-containing complex binding; GO:0097159 organic…	PF01399	PF01399 PCI domain	J	KOG1076	Translation initiation factor 3, subunit c (eIF-3c)	WP5027 NSP1 FROM SARSCOV2 INHIBITS TRANSLATION INITIATION IN THE HOST CELL;WP107 TRANSLATION FACTORS	http://www.wikipathways.org/instance/WP5027_r120060;http://www.wikipathways.org/instance/WP107_r117851		R-HSA-156827 L13a-mediated translational silencing of Ceruloplasmin expression;R-HSA-392499 Metabolism of proteins;R-HSA-72613 Eukaryotic Translation Initiation;R-HSA-72649 Translation initiation complex formation;R-HSA-72662 Activation of the mRNA upon binding of the cap-binding complex and eIFs, and subsequent binding to 43S;R-HSA-72689 Formation of a pool of free 40S subunits;R-HSA-72695 Forma…	https://reactome.org/PathwayBrowser/#/R-HSA-156827;https://reactome.org/PathwayBrowser/#/R-HSA-392499;https://reactome.org/PathwayBrowser/#/R-HSA-72613;https://reactome.org/PathwayBrowser/#/R-HSA-72649;https://reactome.org/PathwayBrowser/#/R-HSA-72662;https://reactome.org/PathwayBrowser/#/R-HSA-72689;https://reactome.org/PathwayBrowser/#/R-HSA-72695;https://reactome.org/PathwayBrowser/#/R-HSA-727…
Q13765	82	K		None	Nascent polypeptide-associated complex subunit alpha OS=Homo sapiens OX=9606 GN=NACA PE=1 SV=1	NACA	1	0.0681831	42.835	2	AMSK(1)LGLR	2.2533	27280	0			cytoplasm	K03626	EGD2; nascent polypeptide-associated complex subunit alpha	hsa04928 Parathyroid hormone synthesis, secretion and action	GO:0000003 reproduction; GO:0002376 immune system process; GO:0002520 immune system development; GO:0003006 developmental process involved in reproduction; GO:0006996 organelle organization; GO:0007010 cytoskeleton organization; GO:0007275 multicellular organism development; GO:0007276 gamete generation; GO:0007281 germ cell development; GO:0007292 female gamete generation; GO:0009653 anatomical …	GO:0005622 intracellular anatomical structure; GO:0005634 nucleus; GO:0005737 cytoplasm; GO:0043226 organelle; GO:0043227 membrane-bounded organelle; GO:0043229 intracellular organelle; GO:0043231 intracellular membrane-bounded organelle;	GO:0003712 transcription coregulator activity; GO:0003713 transcription coactivator activity; GO:0005488 binding; GO:0005515 protein binding; GO:0008134 transcription factor binding; GO:0017025 TBP-class protein binding; GO:0140110 transcription regulator activity;	PF19026	PF19026 HYPK UBA domain	K	KOG2239	Transcription factor containing NAC and TS-N domains	WP4754 IL18 SIGNALING PATHWAY	http://www.wikipathways.org/instance/WP4754_r115147
Q13765	142	K		None	Nascent polypeptide-associated complex subunit alpha OS=Homo sapiens OX=9606 GN=NACA PE=1 SV=1	NACA	1	1.03199e-28	183.7	2	IEDLSQQAQLAAAEK(1)FK	-2.7959	152180	128900			cytoplasm	K03626	EGD2; nascent polypeptide-associated complex subunit alpha	hsa04928 Parathyroid hormone synthesis, secretion and action	GO:0000003 reproduction; GO:0002376 immune system process; GO:0002520 immune system development; GO:0003006 developmental process involved in reproduction; GO:0006996 organelle organization; GO:0007010 cytoskeleton organization; GO:0007275 multicellular organism development; GO:0007276 gamete generation; GO:0007281 germ cell development; GO:0007292 female gamete generation; GO:0009653 anatomical …	GO:0005622 intracellular anatomical structure; GO:0005634 nucleus; GO:0005737 cytoplasm; GO:0043226 organelle; GO:0043227 membrane-bounded organelle; GO:0043229 intracellular organelle; GO:0043231 intracellular membrane-bounded organelle;	GO:0003712 transcription coregulator activity; GO:0003713 transcription coactivator activity; GO:0005488 binding; GO:0005515 protein binding; GO:0008134 transcription factor binding; GO:0017025 TBP-class protein binding; GO:0140110 transcription regulator activity;	PF19026	PF19026 HYPK UBA domain	K	KOG2239	Transcription factor containing NAC and TS-N domains	WP4754 IL18 SIGNALING PATHWAY	http://www.wikipathways.org/instance/WP4754_r115147
Q13765	100	K		None	Nascent polypeptide-associated complex subunit alpha OS=Homo sapiens OX=9606 GN=NACA PE=1 SV=1	NACA	1	3.14626e-13	141.88	2	SK(1)NILFVITKPDVYK	-1.1896	96013	115680			cytoplasm	K03626	EGD2; nascent polypeptide-associated complex subunit alpha	hsa04928 Parathyroid hormone synthesis, secretion and action	GO:0000003 reproduction; GO:0002376 immune system process; GO:0002520 immune system development; GO:0003006 developmental process involved in reproduction; GO:0006996 organelle organization; GO:0007010 cytoskeleton organization; GO:0007275 multicellular organism development; GO:0007276 gamete generation; GO:0007281 germ cell development; GO:0007292 female gamete generation; GO:0009653 anatomical …	GO:0005622 intracellular anatomical structure; GO:0005634 nucleus; GO:0005737 cytoplasm; GO:0043226 organelle; GO:0043227 membrane-bounded organelle; GO:0043229 intracellular organelle; GO:0043231 intracellular membrane-bounded organelle;	GO:0003712 transcription coregulator activity; GO:0003713 transcription coactivator activity; GO:0005488 binding; GO:0005515 protein binding; GO:0008134 transcription factor binding; GO:0017025 TBP-class protein binding; GO:0140110 transcription regulator activity;	PF19026	PF19026 HYPK UBA domain	K	KOG2239	Transcription factor containing NAC and TS-N domains	WP4754 IL18 SIGNALING PATHWAY	http://www.wikipathways.org/instance/WP4754_r115147
E9PRG8	109	K	1.81242	Up	Uncharacterized protein C11orf98 OS=Homo sapiens OX=9606 GN=C11orf98 PE=4 SV=2	C11orf98	1	2.41562e-05	62.494	2	TK(1)APQDVEMK	1.804	16308	32002	0.703065	1.27425	nucleus
L0R819	45	K		None	ASNSD1 upstream open reading frame protein OS=Homo sapiens OX=9606 GN=ASDURF PE=1 SV=1	ASDURF	1	5.27144e-05	81.099	2	IVVDELSNLK(1)K	0.12496	16193	19405			nucleus									E	KOG0573	Asparagine synthase
O00139	165	K	0.769986	None	Kinesin-like protein KIF2A OS=Homo sapiens OX=9606 GN=KIF2A PE=1 SV=3	KIF2A	1	0.0014016	69.905	2	EVEK(1)LQEK	1.1899	69910	48285	1.12204	0.863951	cytoplasm,nucleus	K10393			GO:0000003 reproduction; GO:0000070 mitotic sister chromatid segregation; GO:0000212 meiotic spindle organization; GO:0000226 microtubule cytoskeleton organization; GO:0000278 mitotic cell cycle; GO:0000280 nuclear division; GO:0000819 sister chromatid segregation; GO:0001578 microtubule bundle formation; GO:0001709 cell fate determination; GO:0002376 immune system process; GO:0002478 antigen pro…	GO:0000235 astral microtubule; GO:0000775 chromosome, centromeric region; GO:0000776 kinetochore; GO:0000779 condensed chromosome, centromeric region; GO:0000793 condensed chromosome; GO:0000922 spindle pole; GO:0005622 intracellular anatomical structure; GO:0005634 nucleus; GO:0005654 nucleoplasm; GO:0005694 chromosome; GO:0005730 nucleolus; GO:0005737 cytoplasm; GO:0005813 centrosome; GO:000581…	GO:0003774 cytoskeletal motor activity; GO:0003777 microtubule motor activity; GO:0003824 catalytic activity; GO:0005488 binding; GO:0005515 protein binding; GO:0008017 microtubule binding; GO:0008092 cytoskeletal protein binding; GO:0008574 plus-end-directed microtubule motor activity; GO:0015631 tubulin binding; GO:0016462 pyrophosphatase activity; GO:0016787 hydrolase activity; GO:0016817 hydr…	PF00225	PF00225 Kinesin motor domain	Z	KOG0246	Kinesin-like protein				R-HSA-109582 Hemostasis;R-HSA-1280218 Adaptive Immune System;R-HSA-141424 Amplification of signal from the kinetochores;R-HSA-141444 Amplification of signal from unattached kinetochores via a MAD2 inhibitory signal;R-HSA-162582 Signal Transduction;R-HSA-1640170 Cell Cycle;R-HSA-168256 Immune System;R-HSA-194315 Signaling by Rho GTPases;R-HSA-195258 RHO GTPase Effectors;R-HSA-199991 Membrane Traff…	https://reactome.org/PathwayBrowser/#/R-HSA-109582;https://reactome.org/PathwayBrowser/#/R-HSA-1280218;https://reactome.org/PathwayBrowser/#/R-HSA-141424;https://reactome.org/PathwayBrowser/#/R-HSA-141444;https://reactome.org/PathwayBrowser/#/R-HSA-162582;https://reactome.org/PathwayBrowser/#/R-HSA-1640170;https://reactome.org/PathwayBrowser/#/R-HSA-168256;https://reactome.org/PathwayBrowser/#/R-…	COMPLEMENT;GLYCOLYSIS	https://www.gsea-msigdb.org/gsea/msigdb/cards/HALLMARK_COMPLEMENT;https://www.gsea-msigdb.org/gsea/msigdb/cards/HALLMARK_GLYCOLYSIS
O00139	102	K	1.23833	None	Kinesin-like protein KIF2A OS=Homo sapiens OX=9606 GN=KIF2A PE=1 SV=3	KIF2A	1	7.34758e-06	119.94	2	TVASIK(1)NDPPSR	2.7382	206360	229220	0.898719	1.11291	cytoplasm,nucleus	K10393			GO:0000003 reproduction; GO:0000070 mitotic sister chromatid segregation; GO:0000212 meiotic spindle organization; GO:0000226 microtubule cytoskeleton organization; GO:0000278 mitotic cell cycle; GO:0000280 nuclear division; GO:0000819 sister chromatid segregation; GO:0001578 microtubule bundle formation; GO:0001709 cell fate determination; GO:0002376 immune system process; GO:0002478 antigen pro…	GO:0000235 astral microtubule; GO:0000775 chromosome, centromeric region; GO:0000776 kinetochore; GO:0000779 condensed chromosome, centromeric region; GO:0000793 condensed chromosome; GO:0000922 spindle pole; GO:0005622 intracellular anatomical structure; GO:0005634 nucleus; GO:0005654 nucleoplasm; GO:0005694 chromosome; GO:0005730 nucleolus; GO:0005737 cytoplasm; GO:0005813 centrosome; GO:000581…	GO:0003774 cytoskeletal motor activity; GO:0003777 microtubule motor activity; GO:0003824 catalytic activity; GO:0005488 binding; GO:0005515 protein binding; GO:0008017 microtubule binding; GO:0008092 cytoskeletal protein binding; GO:0008574 plus-end-directed microtubule motor activity; GO:0015631 tubulin binding; GO:0016462 pyrophosphatase activity; GO:0016787 hydrolase activity; GO:0016817 hydr…	PF00225	PF00225 Kinesin motor domain	Z	KOG0246	Kinesin-like protein				R-HSA-109582 Hemostasis;R-HSA-1280218 Adaptive Immune System;R-HSA-141424 Amplification of signal from the kinetochores;R-HSA-141444 Amplification of signal from unattached kinetochores via a MAD2 inhibitory signal;R-HSA-162582 Signal Transduction;R-HSA-1640170 Cell Cycle;R-HSA-168256 Immune System;R-HSA-194315 Signaling by Rho GTPases;R-HSA-195258 RHO GTPase Effectors;R-HSA-199991 Membrane Traff…	https://reactome.org/PathwayBrowser/#/R-HSA-109582;https://reactome.org/PathwayBrowser/#/R-HSA-1280218;https://reactome.org/PathwayBrowser/#/R-HSA-141424;https://reactome.org/PathwayBrowser/#/R-HSA-141444;https://reactome.org/PathwayBrowser/#/R-HSA-162582;https://reactome.org/PathwayBrowser/#/R-HSA-1640170;https://reactome.org/PathwayBrowser/#/R-HSA-168256;https://reactome.org/PathwayBrowser/#/R-…	COMPLEMENT;GLYCOLYSIS	https://www.gsea-msigdb.org/gsea/msigdb/cards/HALLMARK_COMPLEMENT;https://www.gsea-msigdb.org/gsea/msigdb/cards/HALLMARK_GLYCOLYSIS
O00148	35	K	1.33495	None	ATP-dependent RNA helicase DDX39A OS=Homo sapiens OX=9606 GN=DDX39A PE=1 SV=2	DDX39A	1	1.55161e-14	128.46	2	DIK(1)GSYVSIHSSGFR	-1.3691	102920	130870	0.859548	1.14745	cytoplasm	K13182			GO:0000375 RNA splicing, via transesterification reactions; GO:0000377 RNA splicing, via transesterification reactions with bulged adenosine as nucleophile; GO:0000381 regulation of alternative mRNA splicing, via spliceosome; GO:0000398 mRNA splicing, via spliceosome; GO:0006139 nucleobase-containing compound metabolic process; GO:0006325 chromatin organization; GO:0006338 chromatin remodeling; G…	GO:0000346 transcription export complex; GO:0005622 intracellular anatomical structure; GO:0005634 nucleus; GO:0005654 nucleoplasm; GO:0005667 transcription regulator complex; GO:0005681 spliceosomal complex; GO:0005730 nucleolus; GO:0005737 cytoplasm; GO:0016604 nuclear body; GO:0016607 nuclear speck; GO:0031974 membrane-enclosed lumen; GO:0031981 nuclear lumen; GO:0032991 protein-containing com…	GO:0003724 RNA helicase activity; GO:0003824 catalytic activity; GO:0004386 helicase activity; GO:0005488 binding; GO:0005515 protein binding; GO:0008134 transcription factor binding; GO:0008186 ATP-dependent activity, acting on RNA; GO:0016462 pyrophosphatase activity; GO:0016787 hydrolase activity; GO:0016817 hydrolase activity, acting on acid anhydrides; GO:0016818 hydrolase activity, acting o…	PF00270; PF00271	PF00270 DEAD/DEAH box helicase; PF00271 Helicase conserved C-terminal domain	A	KOG0329	ATP-dependent RNA helicase				R-HSA-159236 Transport of Mature mRNA derived from an Intron-Containing Transcript;R-HSA-72187 mRNA 3'-end processing;R-HSA-72202 Transport of Mature Transcript to Cytoplasm;R-HSA-72203 Processing of Capped Intron-Containing Pre-mRNA;R-HSA-73856 RNA Polymerase II Transcription Termination;R-HSA-73857 RNA Polymerase II Transcription;R-HSA-74160 Gene expression (Transcription);R-HSA-8953854 Metabol…	https://reactome.org/PathwayBrowser/#/R-HSA-159236;https://reactome.org/PathwayBrowser/#/R-HSA-72187;https://reactome.org/PathwayBrowser/#/R-HSA-72202;https://reactome.org/PathwayBrowser/#/R-HSA-72203;https://reactome.org/PathwayBrowser/#/R-HSA-73856;https://reactome.org/PathwayBrowser/#/R-HSA-73857;https://reactome.org/PathwayBrowser/#/R-HSA-74160;https://reactome.org/PathwayBrowser/#/R-HSA-8953…	E2F TARGETS;G2M CHECKPOINT;MTORC1 SIGNALING	https://www.gsea-msigdb.org/gsea/msigdb/cards/HALLMARK_E2F_TARGETS;https://www.gsea-msigdb.org/gsea/msigdb/cards/HALLMARK_G2M_CHECKPOINT;https://www.gsea-msigdb.org/gsea/msigdb/cards/HALLMARK_MTORC1_SIGNALING
Q13838	334	K	0.96451	None	Spliceosome RNA helicase DDX39B OS=Homo sapiens OX=9606 GN=DDX39B PE=1 SV=1	DDX39B	1	0.000878616	79.059	2	YQQFK(1)DFQR	0.7826	54350	47991	1.01725	0.981152	cytoplasm,nucleus	K12812	DDX39B; ATP-dependent RNA helicase UAP56/SUB2 [EC:3.6.4.13]	hsa03040 Spliceosome; hsa03013 Nucleocytoplasmic transport; hsa03015 mRNA surveillance pathway	GO:0000245 spliceosomal complex assembly; GO:0000375 RNA splicing, via transesterification reactions; GO:0000377 RNA splicing, via transesterification reactions with bulged adenosine as nucleophile; GO:0000398 mRNA splicing, via spliceosome; GO:0001558 regulation of cell growth; GO:0001889 liver development; GO:0006139 nucleobase-containing compound metabolic process; GO:0006355 regulation of tra…	GO:0000346 transcription export complex; GO:0005622 intracellular anatomical structure; GO:0005634 nucleus; GO:0005654 nucleoplasm; GO:0005681 spliceosomal complex; GO:0005730 nucleolus; GO:0005737 cytoplasm; GO:0016363 nuclear matrix; GO:0016604 nuclear body; GO:0016607 nuclear speck; GO:0031974 membrane-enclosed lumen; GO:0031981 nuclear lumen; GO:0032991 protein-containing complex; GO:0034399 …	GO:0003676 nucleic acid binding; GO:0003723 RNA binding; GO:0003724 RNA helicase activity; GO:0003824 catalytic activity; GO:0004386 helicase activity; GO:0005488 binding; GO:0005515 protein binding; GO:0008186 ATP-dependent activity, acting on RNA; GO:0016462 pyrophosphatase activity; GO:0016787 hydrolase activity; GO:0016817 hydrolase activity, acting on acid anhydrides; GO:0016818 hydrolase ac…	PF00270; PF00271	PF00270 DEAD/DEAH box helicase; PF00271 Helicase conserved C-terminal domain	A	KOG0329	ATP-dependent RNA helicase				R-HSA-159236 Transport of Mature mRNA derived from an Intron-Containing Transcript;R-HSA-162582 Signal Transduction;R-HSA-194315 Signaling by Rho GTPases;R-HSA-72187 mRNA 3'-end processing;R-HSA-72202 Transport of Mature Transcript to Cytoplasm;R-HSA-72203 Processing of Capped Intron-Containing Pre-mRNA;R-HSA-73856 RNA Polymerase II Transcription Termination;R-HSA-73857 RNA Polymerase II Transcri…	https://reactome.org/PathwayBrowser/#/R-HSA-159236;https://reactome.org/PathwayBrowser/#/R-HSA-162582;https://reactome.org/PathwayBrowser/#/R-HSA-194315;https://reactome.org/PathwayBrowser/#/R-HSA-72187;https://reactome.org/PathwayBrowser/#/R-HSA-72202;https://reactome.org/PathwayBrowser/#/R-HSA-72203;https://reactome.org/PathwayBrowser/#/R-HSA-73856;https://reactome.org/PathwayBrowser/#/R-HSA-73…
O00151	246	K	1.26012	None	PDZ and LIM domain protein 1 OS=Homo sapiens OX=9606 GN=PDLIM1 PE=1 SV=4	PDLIM1	1	9.27575e-15	147.02	2	APVTK(1)VAASIGNAQK	-1.0111	287720	254160	0.903179	1.13812	cytoplasm	K23353			GO:0006355 regulation of transcription, DNA-templated; GO:0006950 response to stress; GO:0006979 response to oxidative stress; GO:0009889 regulation of biosynthetic process; GO:0009891 positive regulation of biosynthetic process; GO:0009893 positive regulation of metabolic process; GO:0010468 regulation of gene expression; GO:0010556 regulation of macromolecule biosynthetic process; GO:0010557 po…	GO:0005622 intracellular anatomical structure; GO:0005667 transcription regulator complex; GO:0032991 protein-containing complex;	GO:0003712 transcription coregulator activity; GO:0003713 transcription coactivator activity; GO:0140110 transcription regulator activity;	PF00595; PF00412	PF00595 PDZ domain; PF00412 LIM domain	TZ	KOG1703	Adaptor protein Enigma and related PDZ-LIM proteins						REACTIVE OXYGEN SPECIES PATHWAY	https://www.gsea-msigdb.org/gsea/msigdb/cards/HALLMARK_REACTIVE_OXYGEN_SPECIES_PATHWAY
O00151	103	K	1.29317	None	PDZ and LIM domain protein 1 OS=Homo sapiens OX=9606 GN=PDLIM1 PE=1 SV=4	PDLIM1	1	3.50639e-12	127.62	4	HPYK(1)MNLASEPQEVLHIGSAHNR	-1.0049	71659	64961	0.892203	1.15377	cytoplasm	K23353			GO:0006355 regulation of transcription, DNA-templated; GO:0006950 response to stress; GO:0006979 response to oxidative stress; GO:0009889 regulation of biosynthetic process; GO:0009891 positive regulation of biosynthetic process; GO:0009893 positive regulation of metabolic process; GO:0010468 regulation of gene expression; GO:0010556 regulation of macromolecule biosynthetic process; GO:0010557 po…	GO:0005622 intracellular anatomical structure; GO:0005667 transcription regulator complex; GO:0032991 protein-containing complex;	GO:0003712 transcription coregulator activity; GO:0003713 transcription coactivator activity; GO:0140110 transcription regulator activity;	PF00595; PF00412	PF00595 PDZ domain; PF00412 LIM domain	TZ	KOG1703	Adaptor protein Enigma and related PDZ-LIM proteins						REACTIVE OXYGEN SPECIES PATHWAY	https://www.gsea-msigdb.org/gsea/msigdb/cards/HALLMARK_REACTIVE_OXYGEN_SPECIES_PATHWAY
O00151	241	K		None	PDZ and LIM domain protein 1 OS=Homo sapiens OX=9606 GN=PDLIM1 PE=1 SV=4	PDLIM1	1	0.0303799	44.82	2	SVK(1)APVTK	-1.6859	12284	0	0.850505		cytoplasm	K23353			GO:0006355 regulation of transcription, DNA-templated; GO:0006950 response to stress; GO:0006979 response to oxidative stress; GO:0009889 regulation of biosynthetic process; GO:0009891 positive regulation of biosynthetic process; GO:0009893 positive regulation of metabolic process; GO:0010468 regulation of gene expression; GO:0010556 regulation of macromolecule biosynthetic process; GO:0010557 po…	GO:0005622 intracellular anatomical structure; GO:0005667 transcription regulator complex; GO:0032991 protein-containing complex;	GO:0003712 transcription coregulator activity; GO:0003713 transcription coactivator activity; GO:0140110 transcription regulator activity;	PF00595; PF00412	PF00595 PDZ domain; PF00412 LIM domain	TZ	KOG1703	Adaptor protein Enigma and related PDZ-LIM proteins						REACTIVE OXYGEN SPECIES PATHWAY	https://www.gsea-msigdb.org/gsea/msigdb/cards/HALLMARK_REACTIVE_OXYGEN_SPECIES_PATHWAY
O00151	98	K		None	PDZ and LIM domain protein 1 OS=Homo sapiens OX=9606 GN=PDLIM1 PE=1 SV=4	PDLIM1	1	4.02093e-05	53.028	2	VWSPLVTEEGK(1)R	0.96031	43850	0	0.850505		cytoplasm	K23353			GO:0006355 regulation of transcription, DNA-templated; GO:0006950 response to stress; GO:0006979 response to oxidative stress; GO:0009889 regulation of biosynthetic process; GO:0009891 positive regulation of biosynthetic process; GO:0009893 positive regulation of metabolic process; GO:0010468 regulation of gene expression; GO:0010556 regulation of macromolecule biosynthetic process; GO:0010557 po…	GO:0005622 intracellular anatomical structure; GO:0005667 transcription regulator complex; GO:0032991 protein-containing complex;	GO:0003712 transcription coregulator activity; GO:0003713 transcription coactivator activity; GO:0140110 transcription regulator activity;	PF00595; PF00412	PF00595 PDZ domain; PF00412 LIM domain	TZ	KOG1703	Adaptor protein Enigma and related PDZ-LIM proteins						REACTIVE OXYGEN SPECIES PATHWAY	https://www.gsea-msigdb.org/gsea/msigdb/cards/HALLMARK_REACTIVE_OXYGEN_SPECIES_PATHWAY
O00193	91	K	0.954179	None	Small acidic protein OS=Homo sapiens OX=9606 GN=SMAP PE=1 SV=1	SMAP	1	8.30531e-129	319.43	3	KINEELESQYQQSMDSK(1)LSGR	0.0024222	2682800	2332800	1.02234	0.975491	nucleus
O00193	62	K	1.15271	None	Small acidic protein OS=Homo sapiens OX=9606 GN=SMAP PE=1 SV=1	SMAP	1	3.04939e-13	143.22	2	LVIGDHK(1)STSHFR	0.13242	510670	536440	0.932129	1.07448	nucleus
O00193	174	K	1.19486	None	Small acidic protein OS=Homo sapiens OX=9606 GN=SMAP PE=1 SV=1	SMAP	1	0.000689826	79.059	2	SNYK(1)MMFVK	-1.3815	470440	512250	0.914989	1.09329	nucleus
O00203	803	K	1.05974	None	AP-3 complex subunit beta-1 OS=Homo sapiens OX=9606 GN=AP3B1 PE=1 SV=3	AP3B1	0.99958	0.000600585	74.269	2	EKEK(1)K(1)TK(1)QDR	9.9063	54956	59293	0.970745	1.02874	cytoplasm	K12397	AP3B; AP-3 complex subunit beta	hsa04142 Lysosome	GO:0000041 transition metal ion transport; GO:0002376 immune system process; GO:0002475 antigen processing and presentation via MHC class Ib; GO:0002682 regulation of immune system process; GO:0002684 positive regulation of immune system process; GO:0002694 regulation of leukocyte activation; GO:0002696 positive regulation of leukocyte activation; GO:0006605 protein targeting; GO:0006622 protein …	GO:0005622 intracellular anatomical structure; GO:0005737 cytoplasm; GO:0005794 Golgi apparatus; GO:0005798 Golgi-associated vesicle; GO:0005802 trans-Golgi network; GO:0012505 endomembrane system; GO:0016020 membrane; GO:0030117 membrane coat; GO:0030119 AP-type membrane coat adaptor complex; GO:0030123 AP-3 adaptor complex; GO:0030135 coated vesicle; GO:0030137 COPI-coated vesicle; GO:0031410 c…	GO:0005215 transporter activity; GO:0005488 binding; GO:0005515 protein binding; GO:0019899 enzyme binding; GO:0019902 phosphatase binding; GO:0019903 protein phosphatase binding; GO:0030742 GTP-dependent protein binding;			U	KOG1060	Vesicle coat complex AP-3, beta subunit				R-HSA-1643685 Disease;R-HSA-199991 Membrane Trafficking;R-HSA-199992 trans-Golgi Network Vesicle Budding;R-HSA-432722 Golgi Associated Vesicle Biogenesis;R-HSA-5653656 Vesicle-mediated transport;R-HSA-5663202 Diseases of signal transduction by growth factor receptors and second messengers;R-HSA-6802952 Signaling by BRAF and RAF1 fusions;R-HSA-6802957 Oncogenic MAPK signaling	https://reactome.org/PathwayBrowser/#/R-HSA-1643685;https://reactome.org/PathwayBrowser/#/R-HSA-199991;https://reactome.org/PathwayBrowser/#/R-HSA-199992;https://reactome.org/PathwayBrowser/#/R-HSA-432722;https://reactome.org/PathwayBrowser/#/R-HSA-5653656;https://reactome.org/PathwayBrowser/#/R-HSA-5663202;https://reactome.org/PathwayBrowser/#/R-HSA-6802952;https://reactome.org/PathwayBrowser/#/…	PROTEIN SECRETION	https://www.gsea-msigdb.org/gsea/msigdb/cards/HALLMARK_PROTEIN_SECRETION
O00203	804	K	1.05974	None	AP-3 complex subunit beta-1 OS=Homo sapiens OX=9606 GN=AP3B1 PE=1 SV=3	AP3B1	0.999987	0.000600585	74.269	2	EKEK(1)K(1)TK(1)QDR	9.9063	54956	59293	0.970745	1.02874	cytoplasm	K12397	AP3B; AP-3 complex subunit beta	hsa04142 Lysosome	GO:0000041 transition metal ion transport; GO:0002376 immune system process; GO:0002475 antigen processing and presentation via MHC class Ib; GO:0002682 regulation of immune system process; GO:0002684 positive regulation of immune system process; GO:0002694 regulation of leukocyte activation; GO:0002696 positive regulation of leukocyte activation; GO:0006605 protein targeting; GO:0006622 protein …	GO:0005622 intracellular anatomical structure; GO:0005737 cytoplasm; GO:0005794 Golgi apparatus; GO:0005798 Golgi-associated vesicle; GO:0005802 trans-Golgi network; GO:0012505 endomembrane system; GO:0016020 membrane; GO:0030117 membrane coat; GO:0030119 AP-type membrane coat adaptor complex; GO:0030123 AP-3 adaptor complex; GO:0030135 coated vesicle; GO:0030137 COPI-coated vesicle; GO:0031410 c…	GO:0005215 transporter activity; GO:0005488 binding; GO:0005515 protein binding; GO:0019899 enzyme binding; GO:0019902 phosphatase binding; GO:0019903 protein phosphatase binding; GO:0030742 GTP-dependent protein binding;			U	KOG1060	Vesicle coat complex AP-3, beta subunit				R-HSA-1643685 Disease;R-HSA-199991 Membrane Trafficking;R-HSA-199992 trans-Golgi Network Vesicle Budding;R-HSA-432722 Golgi Associated Vesicle Biogenesis;R-HSA-5653656 Vesicle-mediated transport;R-HSA-5663202 Diseases of signal transduction by growth factor receptors and second messengers;R-HSA-6802952 Signaling by BRAF and RAF1 fusions;R-HSA-6802957 Oncogenic MAPK signaling	https://reactome.org/PathwayBrowser/#/R-HSA-1643685;https://reactome.org/PathwayBrowser/#/R-HSA-199991;https://reactome.org/PathwayBrowser/#/R-HSA-199992;https://reactome.org/PathwayBrowser/#/R-HSA-432722;https://reactome.org/PathwayBrowser/#/R-HSA-5653656;https://reactome.org/PathwayBrowser/#/R-HSA-5663202;https://reactome.org/PathwayBrowser/#/R-HSA-6802952;https://reactome.org/PathwayBrowser/#/…	PROTEIN SECRETION	https://www.gsea-msigdb.org/gsea/msigdb/cards/HALLMARK_PROTEIN_SECRETION
O00203	806	K	1.05974	None	AP-3 complex subunit beta-1 OS=Homo sapiens OX=9606 GN=AP3B1 PE=1 SV=3	AP3B1	1	0.000600585	74.269	2	EKEK(1)K(1)TK(1)QDR	9.9063	54956	59293	0.970745	1.02874	cytoplasm	K12397	AP3B; AP-3 complex subunit beta	hsa04142 Lysosome	GO:0000041 transition metal ion transport; GO:0002376 immune system process; GO:0002475 antigen processing and presentation via MHC class Ib; GO:0002682 regulation of immune system process; GO:0002684 positive regulation of immune system process; GO:0002694 regulation of leukocyte activation; GO:0002696 positive regulation of leukocyte activation; GO:0006605 protein targeting; GO:0006622 protein …	GO:0005622 intracellular anatomical structure; GO:0005737 cytoplasm; GO:0005794 Golgi apparatus; GO:0005798 Golgi-associated vesicle; GO:0005802 trans-Golgi network; GO:0012505 endomembrane system; GO:0016020 membrane; GO:0030117 membrane coat; GO:0030119 AP-type membrane coat adaptor complex; GO:0030123 AP-3 adaptor complex; GO:0030135 coated vesicle; GO:0030137 COPI-coated vesicle; GO:0031410 c…	GO:0005215 transporter activity; GO:0005488 binding; GO:0005515 protein binding; GO:0019899 enzyme binding; GO:0019902 phosphatase binding; GO:0019903 protein phosphatase binding; GO:0030742 GTP-dependent protein binding;			U	KOG1060	Vesicle coat complex AP-3, beta subunit				R-HSA-1643685 Disease;R-HSA-199991 Membrane Trafficking;R-HSA-199992 trans-Golgi Network Vesicle Budding;R-HSA-432722 Golgi Associated Vesicle Biogenesis;R-HSA-5653656 Vesicle-mediated transport;R-HSA-5663202 Diseases of signal transduction by growth factor receptors and second messengers;R-HSA-6802952 Signaling by BRAF and RAF1 fusions;R-HSA-6802957 Oncogenic MAPK signaling	https://reactome.org/PathwayBrowser/#/R-HSA-1643685;https://reactome.org/PathwayBrowser/#/R-HSA-199991;https://reactome.org/PathwayBrowser/#/R-HSA-199992;https://reactome.org/PathwayBrowser/#/R-HSA-432722;https://reactome.org/PathwayBrowser/#/R-HSA-5653656;https://reactome.org/PathwayBrowser/#/R-HSA-5663202;https://reactome.org/PathwayBrowser/#/R-HSA-6802952;https://reactome.org/PathwayBrowser/#/…	PROTEIN SECRETION	https://www.gsea-msigdb.org/gsea/msigdb/cards/HALLMARK_PROTEIN_SECRETION
O00231	32	K	0.744612	None	26S proteasome non-ATPase regulatory subunit 11 OS=Homo sapiens OX=9606 GN=PSMD11 PE=1 SV=3	PSMD11	1	1.26054e-06	105.94	2	EASIDILHSIVK(1)R	-2.4821	18460	13991	1.14787	0.854721	cytoplasm	K03036	PSMD11; 26S proteasome regulatory subunit N6	hsa05017 Spinocerebellar ataxia; hsa05016 Huntington disease; hsa03050 Proteasome; hsa05169 Epstein-Barr virus infection; hsa05012 Parkinson disease; hsa05010 Alzheimer disease; hsa05022 Pathways of neurodegeneration - multiple diseases; hsa05014 Amyotrophic lateral sclerosis; hsa05020 Prion disease	GO:0001775 cell activation; GO:0002252 immune effector process; GO:0002263 cell activation involved in immune response; GO:0002274 myeloid leukocyte activation; GO:0002275 myeloid cell activation involved in immune response; GO:0002283 neutrophil activation involved in immune response; GO:0002366 leukocyte activation involved in immune response; GO:0002376 immune system process; GO:0002443 leukoc…	GO:0000502 proteasome complex; GO:0005576 extracellular region; GO:0005622 intracellular anatomical structure; GO:0005634 nucleus; GO:0005654 nucleoplasm; GO:0005737 cytoplasm; GO:0005829 cytosol; GO:0005838 proteasome regulatory particle; GO:0008541 proteasome regulatory particle, lid subcomplex; GO:0012505 endomembrane system; GO:0022624 proteasome accessory complex; GO:0030141 secretory granul…	GO:0005198 structural molecule activity; GO:0005488 binding; GO:0005515 protein binding;	PF18055; PF01399; PF18503	PF18055 26S proteasome regulatory subunit RPN6 N-terminal domain; PF01399 PCI domain; PF18503 26S proteasome subunit RPN6 C-terminal helix domain	O	KOG1463	26S proteasome regulatory complex, subunit RPN6/PSMD11	WP2359 PARKINUBIQUITIN PROTEASOMAL SYSTEM PATHWAY;WP183 PROTEASOME DEGRADATION;WP3888 VEGFAVEGFR2 SIGNALING PATHWAY	http://www.wikipathways.org/instance/WP2359_r119918;http://www.wikipathways.org/instance/WP183_r117060;http://www.wikipathways.org/instance/WP3888_r116782		R-HSA-109581 Apoptosis;R-HSA-1168372 Downstream signaling events of B Cell Receptor (BCR);R-HSA-1169091 Activation of NF-kappaB in B cells;R-HSA-1234174 Cellular response to hypoxia;R-HSA-1234176 Oxygen-dependent proline hydroxylation of Hypoxia-inducible Factor Alpha;R-HSA-1236974 ER-Phagosome pathway;R-HSA-1236975 Antigen processing-Cross presentation;R-HSA-1236978 Cross-presentation of soluble…
O00231	417	K	1.50075	Up	26S proteasome non-ATPase regulatory subunit 11 OS=Homo sapiens OX=9606 GN=PSMD11 PE=1 SV=3	PSMD11	1	1.6887e-08	114.64	2	VVDSLYNK(1)AK	-0.88356	39003	59579	0.798345	1.19812	cytoplasm	K03036	PSMD11; 26S proteasome regulatory subunit N6	hsa05017 Spinocerebellar ataxia; hsa05016 Huntington disease; hsa03050 Proteasome; hsa05169 Epstein-Barr virus infection; hsa05012 Parkinson disease; hsa05010 Alzheimer disease; hsa05022 Pathways of neurodegeneration - multiple diseases; hsa05014 Amyotrophic lateral sclerosis; hsa05020 Prion disease	GO:0001775 cell activation; GO:0002252 immune effector process; GO:0002263 cell activation involved in immune response; GO:0002274 myeloid leukocyte activation; GO:0002275 myeloid cell activation involved in immune response; GO:0002283 neutrophil activation involved in immune response; GO:0002366 leukocyte activation involved in immune response; GO:0002376 immune system process; GO:0002443 leukoc…	GO:0000502 proteasome complex; GO:0005576 extracellular region; GO:0005622 intracellular anatomical structure; GO:0005634 nucleus; GO:0005654 nucleoplasm; GO:0005737 cytoplasm; GO:0005829 cytosol; GO:0005838 proteasome regulatory particle; GO:0008541 proteasome regulatory particle, lid subcomplex; GO:0012505 endomembrane system; GO:0022624 proteasome accessory complex; GO:0030141 secretory granul…	GO:0005198 structural molecule activity; GO:0005488 binding; GO:0005515 protein binding;	PF18055; PF01399; PF18503	PF18055 26S proteasome regulatory subunit RPN6 N-terminal domain; PF01399 PCI domain; PF18503 26S proteasome subunit RPN6 C-terminal helix domain	O	KOG1463	26S proteasome regulatory complex, subunit RPN6/PSMD11	WP2359 PARKINUBIQUITIN PROTEASOMAL SYSTEM PATHWAY;WP183 PROTEASOME DEGRADATION;WP3888 VEGFAVEGFR2 SIGNALING PATHWAY	http://www.wikipathways.org/instance/WP2359_r119918;http://www.wikipathways.org/instance/WP183_r117060;http://www.wikipathways.org/instance/WP3888_r116782		R-HSA-109581 Apoptosis;R-HSA-1168372 Downstream signaling events of B Cell Receptor (BCR);R-HSA-1169091 Activation of NF-kappaB in B cells;R-HSA-1234174 Cellular response to hypoxia;R-HSA-1234176 Oxygen-dependent proline hydroxylation of Hypoxia-inducible Factor Alpha;R-HSA-1236974 ER-Phagosome pathway;R-HSA-1236975 Antigen processing-Cross presentation;R-HSA-1236978 Cross-presentation of soluble…
O00232	419	K	1.298	None	26S proteasome non-ATPase regulatory subunit 12 OS=Homo sapiens OX=9606 GN=PSMD12 PE=1 SV=3	PSMD12	1	1.47764e-09	119.52	2	PK(1)DPNNLLNDWSQK	-0.55596	71051	93617	0.869477	1.12858	cytoplasm	K03035	PSMD12; 26S proteasome regulatory subunit N5	hsa05017 Spinocerebellar ataxia; hsa05016 Huntington disease; hsa03050 Proteasome; hsa05169 Epstein-Barr virus infection; hsa05012 Parkinson disease; hsa05010 Alzheimer disease; hsa05022 Pathways of neurodegeneration - multiple diseases; hsa05014 Amyotrophic lateral sclerosis; hsa05020 Prion disease	GO:0001775 cell activation; GO:0002252 immune effector process; GO:0002263 cell activation involved in immune response; GO:0002274 myeloid leukocyte activation; GO:0002275 myeloid cell activation involved in immune response; GO:0002283 neutrophil activation involved in immune response; GO:0002366 leukocyte activation involved in immune response; GO:0002376 immune system process; GO:0002443 leukoc…	GO:0000502 proteasome complex; GO:0005576 extracellular region; GO:0005622 intracellular anatomical structure; GO:0005634 nucleus; GO:0005654 nucleoplasm; GO:0005737 cytoplasm; GO:0005829 cytosol; GO:0005838 proteasome regulatory particle; GO:0008541 proteasome regulatory particle, lid subcomplex; GO:0012505 endomembrane system; GO:0022624 proteasome accessory complex; GO:0030141 secretory granul…		PF01399; PF18098	PF01399 PCI domain; PF18098 26S proteasome regulatory subunit RPN5 C-terminal domain	O	KOG1498	26S proteasome regulatory complex, subunit RPN5/PSMD12	WP5124 ALZHEIMERS DISEASE;WP2059 ALZHEIMERS DISEASE AND MIRNA EFFECTS;WP4352 CILIARY LANDSCAPE;WP2359 PARKINUBIQUITIN PROTEASOMAL SYSTEM PATHWAY;WP183 PROTEASOME DEGRADATION	http://www.wikipathways.org/instance/WP5124_r119432;http://www.wikipathways.org/instance/WP2059_r119468;http://www.wikipathways.org/instance/WP4352_r102218;http://www.wikipathways.org/instance/WP2359_r119918;http://www.wikipathways.org/instance/WP183_r117060		R-HSA-109581 Apoptosis;R-HSA-1168372 Downstream signaling events of B Cell Receptor (BCR);R-HSA-1169091 Activation of NF-kappaB in B cells;R-HSA-1234174 Cellular response to hypoxia;R-HSA-1234176 Oxygen-dependent proline hydroxylation of Hypoxia-inducible Factor Alpha;R-HSA-1236974 ER-Phagosome pathway;R-HSA-1236975 Antigen processing-Cross presentation;R-HSA-1236978 Cross-presentation of soluble…		MTORC1 SIGNALING	https://www.gsea-msigdb.org/gsea/msigdb/cards/HALLMARK_MTORC1_SIGNALING
O00233	123	K	0.964685	None	26S proteasome non-ATPase regulatory subunit 9 OS=Homo sapiens OX=9606 GN=PSMD9 PE=1 SV=3	PSMD9	1	5.97096e-12	145.75	2	K(1)LGQSESQGPPR	1.2504	122950	110880	1.01736	0.981431	cytoskeleton	K06693	PSMD9; 26S proteasome regulatory subunit N4	hsa05017 Spinocerebellar ataxia; hsa05016 Huntington disease; hsa03050 Proteasome; hsa05012 Parkinson disease; hsa05010 Alzheimer disease; hsa05022 Pathways of neurodegeneration - multiple diseases; hsa05014 Amyotrophic lateral sclerosis; hsa05020 Prion disease	GO:0002791 regulation of peptide secretion; GO:0002792 negative regulation of peptide secretion; GO:0002793 positive regulation of peptide secretion; GO:0006355 regulation of transcription, DNA-templated; GO:0006357 regulation of transcription by RNA polymerase II; GO:0006464 cellular protein modification process; GO:0006508 proteolysis; GO:0006511 ubiquitin-dependent protein catabolic process; G…	GO:0000502 proteasome complex; GO:0005622 intracellular anatomical structure; GO:0005634 nucleus; GO:0005654 nucleoplasm; GO:0005737 cytoplasm; GO:0005829 cytosol; GO:0005838 proteasome regulatory particle; GO:0008540 proteasome regulatory particle, base subcomplex; GO:0022624 proteasome accessory complex; GO:0031974 membrane-enclosed lumen; GO:0031981 nuclear lumen; GO:0032991 protein-containing…	GO:0003712 transcription coregulator activity; GO:0003713 transcription coactivator activity; GO:0005488 binding; GO:0005515 protein binding; GO:0008022 protein C-terminus binding; GO:0008134 transcription factor binding; GO:0043425 bHLH transcription factor binding; GO:0140110 transcription regulator activity;	PF18265; PF17820	PF18265 Nas2 N_terminal domain; PF17820 PDZ domain	O	KOG3129	26S proteasome regulatory complex, subunit PSMD9	WP5124 ALZHEIMERS DISEASE;WP2059 ALZHEIMERS DISEASE AND MIRNA EFFECTS;WP2359 PARKINUBIQUITIN PROTEASOMAL SYSTEM PATHWAY;WP183 PROTEASOME DEGRADATION	http://www.wikipathways.org/instance/WP5124_r119432;http://www.wikipathways.org/instance/WP2059_r119468;http://www.wikipathways.org/instance/WP2359_r119918;http://www.wikipathways.org/instance/WP183_r117060		R-HSA-109581 Apoptosis;R-HSA-1168372 Downstream signaling events of B Cell Receptor (BCR);R-HSA-1169091 Activation of NF-kappaB in B cells;R-HSA-1234174 Cellular response to hypoxia;R-HSA-1234176 Oxygen-dependent proline hydroxylation of Hypoxia-inducible Factor Alpha;R-HSA-1236974 ER-Phagosome pathway;R-HSA-1236975 Antigen processing-Cross presentation;R-HSA-1236978 Cross-presentation of soluble…		HEME METABOLISM	https://www.gsea-msigdb.org/gsea/msigdb/cards/HALLMARK_HEME_METABOLISM
O00255	593	K		None	Menin OS=Homo sapiens OX=9606 GN=MEN1 PE=1 SV=4	MEN1	1	0.000457336	78.043	2	LQLTAQSQVQMK(1)K	-1.8736	4550	0			mitochondria	K14970	MEN1; menin	hsa04934 Cushing syndrome; hsa05202 Transcriptional misregulation in cancer	GO:0000003 reproduction; GO:0000075 cell cycle checkpoint signaling; GO:0000077 DNA damage checkpoint signaling; GO:0000079 regulation of cyclin-dependent protein serine/threonine kinase activity; GO:0000122 negative regulation of transcription by RNA polymerase II; GO:0000165 MAPK cascade; GO:0000278 mitotic cell cycle; GO:0001501 skeletal system development; GO:0001503 ossification; GO:0001649 …	GO:0000228 nuclear chromosome; GO:0000781 chromosome, telomeric region; GO:0000785 chromatin; GO:0005622 intracellular anatomical structure; GO:0005634 nucleus; GO:0005654 nucleoplasm; GO:0005694 chromosome; GO:0005737 cytoplasm; GO:0005783 endoplasmic reticulum; GO:0005788 endoplasmic reticulum lumen; GO:0005829 cytosol; GO:0005886 plasma membrane; GO:0012505 endomembrane system; GO:0016020 memb…	GO:0000217 DNA secondary structure binding; GO:0000400 four-way junction DNA binding; GO:0000403 Y-form DNA binding; GO:0001067 transcription regulatory region nucleic acid binding; GO:0003676 nucleic acid binding; GO:0003677 DNA binding; GO:0003682 chromatin binding; GO:0003690 double-stranded DNA binding; GO:0005488 binding; GO:0005515 protein binding; GO:0030674 protein-macromolecule adaptor a…								Transcription factor	R-HSA-162582 Signal Transduction;R-HSA-170834 Signaling by TGF-beta Receptor Complex;R-HSA-194315 Signaling by Rho GTPases;R-HSA-195258 RHO GTPase Effectors;R-HSA-195721 Signaling by WNT;R-HSA-201681 TCF dependent signaling in response to WNT;R-HSA-201722 Formation of the beta-catenin:TCF transactivating complex;R-HSA-212436 Generic Transcription Pathway;R-HSA-2173793 Transcriptional activity of …	https://reactome.org/PathwayBrowser/#/R-HSA-162582;https://reactome.org/PathwayBrowser/#/R-HSA-170834;https://reactome.org/PathwayBrowser/#/R-HSA-194315;https://reactome.org/PathwayBrowser/#/R-HSA-195258;https://reactome.org/PathwayBrowser/#/R-HSA-195721;https://reactome.org/PathwayBrowser/#/R-HSA-201681;https://reactome.org/PathwayBrowser/#/R-HSA-201722;https://reactome.org/PathwayBrowser/#/R-HS…
O00267	143	K	1.50504	Up	Transcription elongation factor SPT5 OS=Homo sapiens OX=9606 GN=SUPT5H PE=1 SV=1	SUPT5H	1	4.5964e-11	98.009	2	EEELGEYYMK(1)K	0.56211	12621	20439	0.792539	1.19281	nucleus	K15172	SUPT5H; transcription elongation factor SPT5	hsa03250 Viral life cycle - HIV-1	GO:0000122 negative regulation of transcription by RNA polymerase II; GO:0001764 neuron migration; GO:0001959 regulation of cytokine-mediated signaling pathway; GO:0001961 positive regulation of cytokine-mediated signaling pathway; GO:0002376 immune system process; GO:0002520 immune system development; GO:0002682 regulation of immune system process; GO:0002684 positive regulation of immune system…	GO:0005622 intracellular anatomical structure; GO:0005634 nucleus; GO:0005654 nucleoplasm; GO:0005694 chromosome; GO:0005700 polytene chromosome; GO:0005703 polytene chromosome puff; GO:0005705 polytene chromosome interband; GO:0008023 transcription elongation factor complex; GO:0031974 membrane-enclosed lumen; GO:0031981 nuclear lumen; GO:0032044 DSIF complex; GO:0032991 protein-containing compl…	GO:0003676 nucleic acid binding; GO:0003677 DNA binding; GO:0003682 chromatin binding; GO:0003723 RNA binding; GO:0003729 mRNA binding; GO:0005488 binding; GO:0005515 protein binding; GO:0019899 enzyme binding; GO:0046982 protein heterodimerization activity; GO:0046983 protein dimerization activity; GO:0097159 organic cyclic compound binding; GO:1901363 heterocyclic compound binding;	PF11942	PF11942 Spt5 transcription elongation factor, acidic N-terminal	K	KOG1999	RNA polymerase II transcription elongation factor DSIF/SUPT5H/SPT5	WP3414 INITIATION OF TRANSCRIPTION AND TRANSLATION ELONGATION AT THE HIV1 LTR;WP411 MRNA PROCESSING	http://www.wikipathways.org/instance/WP3414_r106735;http://www.wikipathways.org/instance/WP411_r117160	Transcription factor	R-HSA-112382 Formation of RNA Pol II elongation complex ;R-HSA-113418 Formation of the Early Elongation Complex;R-HSA-162587 HIV Life Cycle;R-HSA-162599 Late Phase of HIV Life Cycle;R-HSA-162906 HIV Infection;R-HSA-1643685 Disease;R-HSA-167152 Formation of HIV elongation complex in the absence of HIV Tat;R-HSA-167158 Formation of the HIV-1 Early Elongation Complex;R-HSA-167160 RNA Pol II CTD phos…	https://reactome.org/PathwayBrowser/#/R-HSA-112382;https://reactome.org/PathwayBrowser/#/R-HSA-113418;https://reactome.org/PathwayBrowser/#/R-HSA-162587;https://reactome.org/PathwayBrowser/#/R-HSA-162599;https://reactome.org/PathwayBrowser/#/R-HSA-162906;https://reactome.org/PathwayBrowser/#/R-HSA-1643685;https://reactome.org/PathwayBrowser/#/R-HSA-167152;https://reactome.org/PathwayBrowser/#/R-H…	DNA REPAIR	https://www.gsea-msigdb.org/gsea/msigdb/cards/HALLMARK_DNA_REPAIR
O00267	323	K	1.1274	None	Transcription elongation factor SPT5 OS=Homo sapiens OX=9606 GN=SUPT5H PE=1 SV=1	SUPT5H	1	0.00227008	63.397	2	MSLK(1)DWFAK	-2.5246	57257	69458	0.93806	1.05756	nucleus	K15172	SUPT5H; transcription elongation factor SPT5	hsa03250 Viral life cycle - HIV-1	GO:0000122 negative regulation of transcription by RNA polymerase II; GO:0001764 neuron migration; GO:0001959 regulation of cytokine-mediated signaling pathway; GO:0001961 positive regulation of cytokine-mediated signaling pathway; GO:0002376 immune system process; GO:0002520 immune system development; GO:0002682 regulation of immune system process; GO:0002684 positive regulation of immune system…	GO:0005622 intracellular anatomical structure; GO:0005634 nucleus; GO:0005654 nucleoplasm; GO:0005694 chromosome; GO:0005700 polytene chromosome; GO:0005703 polytene chromosome puff; GO:0005705 polytene chromosome interband; GO:0008023 transcription elongation factor complex; GO:0031974 membrane-enclosed lumen; GO:0031981 nuclear lumen; GO:0032044 DSIF complex; GO:0032991 protein-containing compl…	GO:0003676 nucleic acid binding; GO:0003677 DNA binding; GO:0003682 chromatin binding; GO:0003723 RNA binding; GO:0003729 mRNA binding; GO:0005488 binding; GO:0005515 protein binding; GO:0019899 enzyme binding; GO:0046982 protein heterodimerization activity; GO:0046983 protein dimerization activity; GO:0097159 organic cyclic compound binding; GO:1901363 heterocyclic compound binding;	PF11942	PF11942 Spt5 transcription elongation factor, acidic N-terminal	K	KOG1999	RNA polymerase II transcription elongation factor DSIF/SUPT5H/SPT5	WP3414 INITIATION OF TRANSCRIPTION AND TRANSLATION ELONGATION AT THE HIV1 LTR;WP411 MRNA PROCESSING	http://www.wikipathways.org/instance/WP3414_r106735;http://www.wikipathways.org/instance/WP411_r117160	Transcription factor	R-HSA-112382 Formation of RNA Pol II elongation complex ;R-HSA-113418 Formation of the Early Elongation Complex;R-HSA-162587 HIV Life Cycle;R-HSA-162599 Late Phase of HIV Life Cycle;R-HSA-162906 HIV Infection;R-HSA-1643685 Disease;R-HSA-167152 Formation of HIV elongation complex in the absence of HIV Tat;R-HSA-167158 Formation of the HIV-1 Early Elongation Complex;R-HSA-167160 RNA Pol II CTD phos…	https://reactome.org/PathwayBrowser/#/R-HSA-112382;https://reactome.org/PathwayBrowser/#/R-HSA-113418;https://reactome.org/PathwayBrowser/#/R-HSA-162587;https://reactome.org/PathwayBrowser/#/R-HSA-162599;https://reactome.org/PathwayBrowser/#/R-HSA-162906;https://reactome.org/PathwayBrowser/#/R-HSA-1643685;https://reactome.org/PathwayBrowser/#/R-HSA-167152;https://reactome.org/PathwayBrowser/#/R-H…	DNA REPAIR	https://www.gsea-msigdb.org/gsea/msigdb/cards/HALLMARK_DNA_REPAIR
O00268	817	K	1.50728	Up	Transcription initiation factor TFIID subunit 4 OS=Homo sapiens OX=9606 GN=TAF4 PE=1 SV=2	TAF4	1	1.08662e-28	190.68	2	ALSAVSAQAAAAQK(1)NK	-0.79196	32569	50497	0.795405	1.1989	nucleus	K03129	TAF4; transcription initiation factor TFIID subunit 4	hsa03022 Basal transcription factors; hsa05016 Huntington disease	GO:0006139 nucleobase-containing compound metabolic process; GO:0006351 transcription, DNA-templated; GO:0006352 DNA-templated transcription, initiation; GO:0006355 regulation of transcription, DNA-templated; GO:0006357 regulation of transcription by RNA polymerase II; GO:0006366 transcription by RNA polymerase II; GO:0006367 transcription initiation from RNA polymerase II promoter; GO:0006725 ce…	GO:0000123 histone acetyltransferase complex; GO:0000228 nuclear chromosome; GO:0000428 DNA-directed RNA polymerase complex; GO:0000785 chromatin; GO:0001650 fibrillar center; GO:0005622 intracellular anatomical structure; GO:0005634 nucleus; GO:0005654 nucleoplasm; GO:0005667 transcription regulator complex; GO:0005669 transcription factor TFIID complex; GO:0005694 chromosome; GO:0005730 nucleol…	GO:0003676 nucleic acid binding; GO:0003677 DNA binding; GO:0003712 transcription coregulator activity; GO:0003713 transcription coactivator activity; GO:0005102 signaling receptor binding; GO:0005488 binding; GO:0005515 protein binding; GO:0008134 transcription factor binding; GO:0017162 aryl hydrocarbon receptor binding; GO:0051059 NF-kappaB binding; GO:0097159 organic cyclic compound binding; …			K	KOG2341	TATA box binding protein (TBP)-associated factor, RNA polymerase II			Transcription factor	R-HSA-162587 HIV Life Cycle;R-HSA-162599 Late Phase of HIV Life Cycle;R-HSA-162906 HIV Infection;R-HSA-1643685 Disease;R-HSA-167161 HIV Transcription Initiation;R-HSA-167162 RNA Polymerase II HIV Promoter Escape;R-HSA-167172 Transcription of the HIV genome;R-HSA-212436 Generic Transcription Pathway;R-HSA-3700989 Transcriptional Regulation by TP53;R-HSA-5633007 Regulation of TP53 Activity;R-HSA-56…	https://reactome.org/PathwayBrowser/#/R-HSA-162587;https://reactome.org/PathwayBrowser/#/R-HSA-162599;https://reactome.org/PathwayBrowser/#/R-HSA-162906;https://reactome.org/PathwayBrowser/#/R-HSA-1643685;https://reactome.org/PathwayBrowser/#/R-HSA-167161;https://reactome.org/PathwayBrowser/#/R-HSA-167162;https://reactome.org/PathwayBrowser/#/R-HSA-167172;https://reactome.org/PathwayBrowser/#/R-H…
O00273	313	K	0.982312	None	DNA fragmentation factor subunit alpha OS=Homo sapiens OX=9606 GN=DFFA PE=1 SV=1	DFFA	1	8.93394e-29	158.02	2	SISASK(1)ASPPGDLQNPK	-0.020111	133450	113780	1.00829	0.990452	nucleus	K02310	DFFA; DNA fragmentation factor, 45 kD, alpha subunit	hsa04210 Apoptosis	GO:0000737 DNA catabolic process, endonucleolytic; GO:0006139 nucleobase-containing compound metabolic process; GO:0006259 DNA metabolic process; GO:0006308 DNA catabolic process; GO:0006309 apoptotic DNA fragmentation; GO:0006457 protein folding; GO:0006725 cellular aromatic compound metabolic process; GO:0006807 nitrogen compound metabolic process; GO:0006915 apoptotic process; GO:0006921 cellu…	GO:0000228 nuclear chromosome; GO:0000785 chromatin; GO:0005622 intracellular anatomical structure; GO:0005634 nucleus; GO:0005654 nucleoplasm; GO:0005694 chromosome; GO:0005737 cytoplasm; GO:0005829 cytosol; GO:0005886 plasma membrane; GO:0016020 membrane; GO:0031974 membrane-enclosed lumen; GO:0031981 nuclear lumen; GO:0043226 organelle; GO:0043227 membrane-bounded organelle; GO:0043228 non-mem…	GO:0004857 enzyme inhibitor activity; GO:0005488 binding; GO:0005515 protein binding; GO:0019904 protein domain specific binding; GO:0030234 enzyme regulator activity; GO:0044183 protein folding chaperone; GO:0060703 deoxyribonuclease inhibitor activity; GO:0098772 molecular function regulator;	PF02017; PF09033	PF02017 CIDE-N domain; PF09033 DNA Fragmentation factor 45kDa, C terminal domain				WP4298 ACUTE VIRAL MYOCARDITIS;WP254 APOPTOSIS;WP1772 APOPTOSIS MODULATION AND SIGNALING;WP314 FAS LIGAND PATHWAY AND STRESS INDUCTION OF HEAT SHOCK PROTEINS	http://www.wikipathways.org/instance/WP4298_r120527;http://www.wikipathways.org/instance/WP254_r118382;http://www.wikipathways.org/instance/WP1772_r120736;http://www.wikipathways.org/instance/WP314_r116694		R-HSA-109581 Apoptosis;R-HSA-140342 Apoptosis induced DNA fragmentation;R-HSA-5357801 Programmed Cell Death;R-HSA-75153 Apoptotic execution phase	https://reactome.org/PathwayBrowser/#/R-HSA-109581;https://reactome.org/PathwayBrowser/#/R-HSA-140342;https://reactome.org/PathwayBrowser/#/R-HSA-5357801;https://reactome.org/PathwayBrowser/#/R-HSA-75153	APOPTOSIS	https://www.gsea-msigdb.org/gsea/msigdb/cards/HALLMARK_APOPTOSIS
O00287	155	K	1.12097	None	Regulatory factor X-associated protein OS=Homo sapiens OX=9606 GN=RFXAP PE=1 SV=1	RFXAP	1	4.67004e-29	135.24	2	TCTYEGCSETTSQVAK(1)QR	-2.933	37543	46618	0.940223	1.05396	nucleus	K08063	RFXAP; regulatory factor X-associated protein	hsa05152 Tuberculosis; hsa04612 Antigen processing and presentation; hsa05340 Primary immunodeficiency	GO:0006355 regulation of transcription, DNA-templated; GO:0009889 regulation of biosynthetic process; GO:0009891 positive regulation of biosynthetic process; GO:0009893 positive regulation of metabolic process; GO:0010468 regulation of gene expression; GO:0010556 regulation of macromolecule biosynthetic process; GO:0010557 positive regulation of macromolecule biosynthetic process; GO:0010604 posi…	GO:0005622 intracellular anatomical structure; GO:0005634 nucleus; GO:0005654 nucleoplasm; GO:0016604 nuclear body; GO:0016607 nuclear speck; GO:0031974 membrane-enclosed lumen; GO:0031981 nuclear lumen; GO:0043226 organelle; GO:0043227 membrane-bounded organelle; GO:0043229 intracellular organelle; GO:0043231 intracellular membrane-bounded organelle; GO:0043233 organelle lumen; GO:0070013 intrac…	GO:0003676 nucleic acid binding; GO:0003677 DNA binding; GO:0003700 DNA-binding transcription factor activity; GO:0003712 transcription coregulator activity; GO:0003713 transcription coactivator activity; GO:0005488 binding; GO:0097159 organic cyclic compound binding; GO:0140110 transcription regulator activity; GO:1901363 heterocyclic compound binding;	PF15289	PF15289 Regulatory factor X-associated C-terminal binding domain						Transcription factor
O00399	182	K		None	Dynactin subunit 6 OS=Homo sapiens OX=9606 GN=DCTN6 PE=1 SV=1	DCTN6	1	0.0104992	53.517	2	TMK(1)GSSTPVK	0.13018	32950	0	0.867802		cytoplasm	K10428	DCTN6; dynactin 6	hsa05132 Salmonella infection; hsa05016 Huntington disease; hsa05022 Pathways of neurodegeneration - multiple diseases; hsa04962 Vasopressin-regulated water reabsorption; hsa05014 Amyotrophic lateral sclerosis	GO:0000226 microtubule cytoskeleton organization; GO:0000278 mitotic cell cycle; GO:0002376 immune system process; GO:0002478 antigen processing and presentation of exogenous peptide antigen; GO:0002495 antigen processing and presentation of peptide antigen via MHC class II; GO:0002504 antigen processing and presentation of peptide or polysaccharide antigen via MHC class II; GO:0006629 lipid meta…	GO:0005622 intracellular anatomical structure; GO:0005737 cytoplasm; GO:0005739 mitochondrion; GO:0005813 centrosome; GO:0005815 microtubule organizing center; GO:0005829 cytosol; GO:0005856 cytoskeleton; GO:0005869 dynactin complex; GO:0005875 microtubule associated complex; GO:0015629 actin cytoskeleton; GO:0015630 microtubule cytoskeleton; GO:0032991 protein-containing complex; GO:0043226 orga…	GO:0003824 catalytic activity; GO:0005488 binding; GO:0044877 protein-containing complex binding; GO:0070840 dynein complex binding;			UZ	KOG4042	Dynactin subunit p27/WS-3, involved in transport of organelles along microtubules	WP5085 VASOPRESSINREGULATED WATER REABSORPTION	http://www.wikipathways.org/instance/WP5085_r119785		R-HSA-1280218 Adaptive Immune System;R-HSA-168256 Immune System;R-HSA-199977 ER to Golgi Anterograde Transport;R-HSA-199991 Membrane Trafficking;R-HSA-2132295 MHC class II antigen presentation;R-HSA-2262752 Cellular responses to stress;R-HSA-3371497 HSP90 chaperone cycle for steroid hormone receptors (SHR) in the presence of ligand;R-HSA-392499 Metabolism of proteins;R-HSA-446203 Asparagine N-lin…	https://reactome.org/PathwayBrowser/#/R-HSA-1280218;https://reactome.org/PathwayBrowser/#/R-HSA-168256;https://reactome.org/PathwayBrowser/#/R-HSA-199977;https://reactome.org/PathwayBrowser/#/R-HSA-199991;https://reactome.org/PathwayBrowser/#/R-HSA-2132295;https://reactome.org/PathwayBrowser/#/R-HSA-2262752;https://reactome.org/PathwayBrowser/#/R-HSA-3371497;https://reactome.org/PathwayBrowser/#/…
O00418	58	K		None	Eukaryotic elongation factor 2 kinase OS=Homo sapiens OX=9606 GN=EEF2K PE=1 SV=2	EEF2K	1	0.0360484	41.796	2	VNK(1)YYSNLTK	-2.7098	0	38951		0.815235	cytoplasm,nucleus	K08292	EEF2K; elongation factor 2 kinase [EC:2.7.11.20]	hsa04921 Oxytocin signaling pathway; hsa04152 AMPK signaling pathway	GO:0001932 regulation of protein phosphorylation; GO:0002931 response to ischemia; GO:0006412 translation; GO:0006414 translational elongation; GO:0006464 cellular protein modification process; GO:0006468 protein phosphorylation; GO:0006518 peptide metabolic process; GO:0006793 phosphorus metabolic process; GO:0006796 phosphate-containing compound metabolic process; GO:0006807 nitrogen compound m…	GO:0005622 intracellular anatomical structure; GO:0005737 cytoplasm; GO:0005829 cytosol; GO:0014069 postsynaptic density; GO:0030425 dendrite; GO:0032279 asymmetric synapse; GO:0036477 somatodendritic compartment; GO:0042995 cell projection; GO:0043005 neuron projection; GO:0043197 dendritic spine; GO:0043226 organelle; GO:0044309 neuron spine; GO:0045202 synapse; GO:0097447 dendritic tree; GO:00…	GO:0003676 nucleic acid binding; GO:0003723 RNA binding; GO:0003824 catalytic activity; GO:0004672 protein kinase activity; GO:0004674 protein serine/threonine kinase activity; GO:0004683 calmodulin-dependent protein kinase activity; GO:0004686 elongation factor-2 kinase activity; GO:0005488 binding; GO:0005515 protein binding; GO:0005516 calmodulin binding; GO:0008135 translation factor activity…						WP1403 AMPACTIVATED PROTEIN KINASE AMPK SIGNALING;WP3676 BDNFTRKB SIGNALING;WP107 TRANSLATION FACTORS	http://www.wikipathways.org/instance/WP1403_r116516;http://www.wikipathways.org/instance/WP3676_r116809;http://www.wikipathways.org/instance/WP107_r117851		R-HSA-162582 Signal Transduction;R-HSA-165159 MTOR signalling;R-HSA-166208 mTORC1-mediated signalling	https://reactome.org/PathwayBrowser/#/R-HSA-162582;https://reactome.org/PathwayBrowser/#/R-HSA-165159;https://reactome.org/PathwayBrowser/#/R-HSA-166208
O00429	597	K	0.806482	None	Dynamin-1-like protein OS=Homo sapiens OX=9606 GN=DNM1L PE=1 SV=2	DNM1L	1	0.000623174	68.548	2	TSK(1)AEELLAEEK	0.11204	58959	48367	1.10814	0.893692	cytoplasm	K17065	DNM1L; dynamin 1-like protein [EC:3.6.5.5]	hsa04621 NOD-like receptor signaling pathway; hsa04668 TNF signaling pathway; hsa04217 Necroptosis	GO:0000266 mitochondrial fission; GO:0000278 mitotic cell cycle; GO:0000281 mitotic cytokinesis; GO:0000910 cytokinesis; GO:0001505 regulation of neurotransmitter levels; GO:0001666 response to hypoxia; GO:0001703 gastrulation with mouth forming first; GO:0001836 release of cytochrome c from mitochondria; GO:0001956 positive regulation of neurotransmitter secretion; GO:0002791 regulation of pepti…	GO:0000139 Golgi membrane; GO:0005622 intracellular anatomical structure; GO:0005737 cytoplasm; GO:0005739 mitochondrion; GO:0005740 mitochondrial envelope; GO:0005741 mitochondrial outer membrane; GO:0005777 peroxisome; GO:0005783 endoplasmic reticulum; GO:0005789 endoplasmic reticulum membrane; GO:0005794 Golgi apparatus; GO:0005829 cytosol; GO:0005856 cytoskeleton; GO:0005874 microtubule; GO:0…	GO:0000166 nucleotide binding; GO:0001882 nucleoside binding; GO:0001883 purine nucleoside binding; GO:0003824 catalytic activity; GO:0003924 GTPase activity; GO:0005096 GTPase activator activity; GO:0005488 binding; GO:0005515 protein binding; GO:0005525 GTP binding; GO:0008017 microtubule binding; GO:0008047 enzyme activator activity; GO:0008092 cytoskeletal protein binding; GO:0015631 tubulin …	PF00350	PF00350 Dynamin family	UR	KOG0446	Vacuolar sorting protein VPS1, dynamin, and related proteins	WP4874 CAMKK2 PATHWAY;WP2267 SYNAPTIC VESICLE PATHWAY	http://www.wikipathways.org/instance/WP4874_r117669;http://www.wikipathways.org/instance/WP2267_r117179		R-HSA-109581 Apoptosis;R-HSA-5357801 Programmed Cell Death;R-HSA-75153 Apoptotic execution phase	https://reactome.org/PathwayBrowser/#/R-HSA-109581;https://reactome.org/PathwayBrowser/#/R-HSA-5357801;https://reactome.org/PathwayBrowser/#/R-HSA-75153	APOPTOSIS;PROTEIN SECRETION	https://www.gsea-msigdb.org/gsea/msigdb/cards/HALLMARK_APOPTOSIS;https://www.gsea-msigdb.org/gsea/msigdb/cards/HALLMARK_PROTEIN_SECRETION
O00505	47	K		None	Importin subunit alpha-4 OS=Homo sapiens OX=9606 GN=KPNA3 PE=1 SV=2	KPNA3	1	0.043002	46.835	2	DEHLLK(1)K	1.6348	86214	0	0.982168		cytoplasm	K23583	KPNA3_4; importin subunit alpha-4/3	hsa05132 Salmonella infection; hsa03013 Nucleocytoplasmic transport; hsa05207 Chemical carcinogenesis - receptor activation	GO:0000003 reproduction; GO:0000280 nuclear division; GO:0002119 nematode larval development; GO:0002164 larval development; GO:0003006 developmental process involved in reproduction; GO:0006606 protein import into nucleus; GO:0006607 NLS-bearing protein import into nucleus; GO:0006810 transport; GO:0006886 intracellular protein transport; GO:0006913 nucleocytoplasmic transport; GO:0006996 organe…	GO:0005622 intracellular anatomical structure; GO:0005634 nucleus; GO:0005635 nuclear envelope; GO:0005643 nuclear pore; GO:0005654 nucleoplasm; GO:0005737 cytoplasm; GO:0005829 cytosol; GO:0012505 endomembrane system; GO:0031967 organelle envelope; GO:0031974 membrane-enclosed lumen; GO:0031975 envelope; GO:0031981 nuclear lumen; GO:0032991 protein-containing complex; GO:0043226 organelle; GO:00…	GO:0005048 signal sequence binding; GO:0005102 signaling receptor binding; GO:0005112 Notch binding; GO:0005215 transporter activity; GO:0005488 binding; GO:0005515 protein binding; GO:0008022 protein C-terminus binding; GO:0008092 cytoskeletal protein binding; GO:0008139 nuclear localization sequence binding; GO:0017022 myosin binding; GO:0033218 amide binding; GO:0042277 peptide binding;			U	KOG0166	Karyopherin (importin) alpha				R-HSA-1169408 ISG15 antiviral mechanism;R-HSA-1169410 Antiviral mechanism by IFN-stimulated genes;R-HSA-1280215 Cytokine Signaling in Immune system;R-HSA-1643685 Disease;R-HSA-168255 Influenza Infection;R-HSA-168256 Immune System;R-HSA-168276 NS1 Mediated Effects on Host Pathways;R-HSA-5663205 Infectious disease;R-HSA-913531 Interferon Signaling	https://reactome.org/PathwayBrowser/#/R-HSA-1169408;https://reactome.org/PathwayBrowser/#/R-HSA-1169410;https://reactome.org/PathwayBrowser/#/R-HSA-1280215;https://reactome.org/PathwayBrowser/#/R-HSA-1643685;https://reactome.org/PathwayBrowser/#/R-HSA-168255;https://reactome.org/PathwayBrowser/#/R-HSA-168256;https://reactome.org/PathwayBrowser/#/R-HSA-168276;https://reactome.org/PathwayBrowser/#/…
O00515	6	K	1.59207	Up	Ladinin-1 OS=Homo sapiens OX=9606 GN=LAD1 PE=1 SV=2	LAD1	1	0.000384657	83.775	2	K(1)DWSALSSLAR	-0.033779	36879	38233	0.810704	1.2907	nucleus					GO:0005622 intracellular anatomical structure; GO:0005856 cytoskeleton; GO:0015629 actin cytoskeleton; GO:0043226 organelle; GO:0043228 non-membrane-bounded organelle; GO:0043229 intracellular organelle; GO:0043232 intracellular non-membrane-bounded organelle;	GO:0005198 structural molecule activity;											ESTROGEN RESPONSE EARLY	https://www.gsea-msigdb.org/gsea/msigdb/cards/HALLMARK_ESTROGEN_RESPONSE_EARLY
O00541	98	K	1.52173	Up	Pescadillo homolog OS=Homo sapiens OX=9606 GN=PES1 PE=1 SV=1	PES1	1	2.05341e-05	99.276	2	AYGK(1)SEWNTVER	0.30488	38706	62753	0.787943	1.19904	cytoplasm,nucleus	K14843			GO:0000460 maturation of 5.8S rRNA; GO:0000463 maturation of LSU-rRNA from tricistronic rRNA transcript (SSU-rRNA, 5.8S rRNA, LSU-rRNA); GO:0000466 maturation of 5.8S rRNA from tricistronic rRNA transcript (SSU-rRNA, 5.8S rRNA, LSU-rRNA); GO:0000470 maturation of LSU-rRNA; GO:0006139 nucleobase-containing compound metabolic process; GO:0006364 rRNA processing; GO:0006396 RNA processing; GO:000672…	GO:0000793 condensed chromosome; GO:0005622 intracellular anatomical structure; GO:0005634 nucleus; GO:0005654 nucleoplasm; GO:0005694 chromosome; GO:0005730 nucleolus; GO:0005737 cytoplasm; GO:0005829 cytosol; GO:0030684 preribosome; GO:0030686 90S preribosome; GO:0030687 preribosome, large subunit precursor; GO:0031974 membrane-enclosed lumen; GO:0031981 nuclear lumen; GO:0032991 protein-contai…	GO:0003676 nucleic acid binding; GO:0003723 RNA binding; GO:0005488 binding; GO:0097159 organic cyclic compound binding; GO:1901363 heterocyclic compound binding;			A	KOG2481	Protein required for normal rRNA processing				R-HSA-6791226 Major pathway of rRNA processing in the nucleolus and cytosol;R-HSA-72312 rRNA processing;R-HSA-8868773 rRNA processing in the nucleus and cytosol;R-HSA-8953854 Metabolism of RNA	https://reactome.org/PathwayBrowser/#/R-HSA-6791226;https://reactome.org/PathwayBrowser/#/R-HSA-72312;https://reactome.org/PathwayBrowser/#/R-HSA-8868773;https://reactome.org/PathwayBrowser/#/R-HSA-8953854	MYC TARGETS V2	https://www.gsea-msigdb.org/gsea/msigdb/cards/HALLMARK_MYC_TARGETS_V2
O00541	26	K		None	Pescadillo homolog OS=Homo sapiens OX=9606 GN=PES1 PE=1 SV=1	PES1	1	0.000104839	112.8	2	K(1)LQLSLADFR	-4.3386	0	9910.9		0.969302	cytoplasm,nucleus	K14843			GO:0000460 maturation of 5.8S rRNA; GO:0000463 maturation of LSU-rRNA from tricistronic rRNA transcript (SSU-rRNA, 5.8S rRNA, LSU-rRNA); GO:0000466 maturation of 5.8S rRNA from tricistronic rRNA transcript (SSU-rRNA, 5.8S rRNA, LSU-rRNA); GO:0000470 maturation of LSU-rRNA; GO:0006139 nucleobase-containing compound metabolic process; GO:0006364 rRNA processing; GO:0006396 RNA processing; GO:000672…	GO:0000793 condensed chromosome; GO:0005622 intracellular anatomical structure; GO:0005634 nucleus; GO:0005654 nucleoplasm; GO:0005694 chromosome; GO:0005730 nucleolus; GO:0005737 cytoplasm; GO:0005829 cytosol; GO:0030684 preribosome; GO:0030686 90S preribosome; GO:0030687 preribosome, large subunit precursor; GO:0031974 membrane-enclosed lumen; GO:0031981 nuclear lumen; GO:0032991 protein-contai…	GO:0003676 nucleic acid binding; GO:0003723 RNA binding; GO:0005488 binding; GO:0097159 organic cyclic compound binding; GO:1901363 heterocyclic compound binding;			A	KOG2481	Protein required for normal rRNA processing				R-HSA-6791226 Major pathway of rRNA processing in the nucleolus and cytosol;R-HSA-72312 rRNA processing;R-HSA-8868773 rRNA processing in the nucleus and cytosol;R-HSA-8953854 Metabolism of RNA	https://reactome.org/PathwayBrowser/#/R-HSA-6791226;https://reactome.org/PathwayBrowser/#/R-HSA-72312;https://reactome.org/PathwayBrowser/#/R-HSA-8868773;https://reactome.org/PathwayBrowser/#/R-HSA-8953854	MYC TARGETS V2	https://www.gsea-msigdb.org/gsea/msigdb/cards/HALLMARK_MYC_TARGETS_V2
O00541	533	K		None	Pescadillo homolog OS=Homo sapiens OX=9606 GN=PES1 PE=1 SV=1	PES1	1	0.000638186	68.49	2	LAQEEESEAK(1)R	-0.61897	9916	0	1.03271		cytoplasm,nucleus	K14843			GO:0000460 maturation of 5.8S rRNA; GO:0000463 maturation of LSU-rRNA from tricistronic rRNA transcript (SSU-rRNA, 5.8S rRNA, LSU-rRNA); GO:0000466 maturation of 5.8S rRNA from tricistronic rRNA transcript (SSU-rRNA, 5.8S rRNA, LSU-rRNA); GO:0000470 maturation of LSU-rRNA; GO:0006139 nucleobase-containing compound metabolic process; GO:0006364 rRNA processing; GO:0006396 RNA processing; GO:000672…	GO:0000793 condensed chromosome; GO:0005622 intracellular anatomical structure; GO:0005634 nucleus; GO:0005654 nucleoplasm; GO:0005694 chromosome; GO:0005730 nucleolus; GO:0005737 cytoplasm; GO:0005829 cytosol; GO:0030684 preribosome; GO:0030686 90S preribosome; GO:0030687 preribosome, large subunit precursor; GO:0031974 membrane-enclosed lumen; GO:0031981 nuclear lumen; GO:0032991 protein-contai…	GO:0003676 nucleic acid binding; GO:0003723 RNA binding; GO:0005488 binding; GO:0097159 organic cyclic compound binding; GO:1901363 heterocyclic compound binding;			A	KOG2481	Protein required for normal rRNA processing				R-HSA-6791226 Major pathway of rRNA processing in the nucleolus and cytosol;R-HSA-72312 rRNA processing;R-HSA-8868773 rRNA processing in the nucleus and cytosol;R-HSA-8953854 Metabolism of RNA	https://reactome.org/PathwayBrowser/#/R-HSA-6791226;https://reactome.org/PathwayBrowser/#/R-HSA-72312;https://reactome.org/PathwayBrowser/#/R-HSA-8868773;https://reactome.org/PathwayBrowser/#/R-HSA-8953854	MYC TARGETS V2	https://www.gsea-msigdb.org/gsea/msigdb/cards/HALLMARK_MYC_TARGETS_V2
O00541	441	K	1.26492	None	Pescadillo homolog OS=Homo sapiens OX=9606 GN=PES1 PE=1 SV=1	PES1	1	6.17306e-06	126.2	2	LK(1)LLALQR	-1.7858	88709	119550	0.879773	1.11285	cytoplasm,nucleus	K14843			GO:0000460 maturation of 5.8S rRNA; GO:0000463 maturation of LSU-rRNA from tricistronic rRNA transcript (SSU-rRNA, 5.8S rRNA, LSU-rRNA); GO:0000466 maturation of 5.8S rRNA from tricistronic rRNA transcript (SSU-rRNA, 5.8S rRNA, LSU-rRNA); GO:0000470 maturation of LSU-rRNA; GO:0006139 nucleobase-containing compound metabolic process; GO:0006364 rRNA processing; GO:0006396 RNA processing; GO:000672…	GO:0000793 condensed chromosome; GO:0005622 intracellular anatomical structure; GO:0005634 nucleus; GO:0005654 nucleoplasm; GO:0005694 chromosome; GO:0005730 nucleolus; GO:0005737 cytoplasm; GO:0005829 cytosol; GO:0030684 preribosome; GO:0030686 90S preribosome; GO:0030687 preribosome, large subunit precursor; GO:0031974 membrane-enclosed lumen; GO:0031981 nuclear lumen; GO:0032991 protein-contai…	GO:0003676 nucleic acid binding; GO:0003723 RNA binding; GO:0005488 binding; GO:0097159 organic cyclic compound binding; GO:1901363 heterocyclic compound binding;			A	KOG2481	Protein required for normal rRNA processing				R-HSA-6791226 Major pathway of rRNA processing in the nucleolus and cytosol;R-HSA-72312 rRNA processing;R-HSA-8868773 rRNA processing in the nucleus and cytosol;R-HSA-8953854 Metabolism of RNA	https://reactome.org/PathwayBrowser/#/R-HSA-6791226;https://reactome.org/PathwayBrowser/#/R-HSA-72312;https://reactome.org/PathwayBrowser/#/R-HSA-8868773;https://reactome.org/PathwayBrowser/#/R-HSA-8953854	MYC TARGETS V2	https://www.gsea-msigdb.org/gsea/msigdb/cards/HALLMARK_MYC_TARGETS_V2
O00541	517	K	7.92783	Up	Pescadillo homolog OS=Homo sapiens OX=9606 GN=PES1 PE=1 SV=1	PES1	1	2.0555e-05	104.39	2	VMAGTLK(1)LEDK	6.6255	12764	107810	0.218645	1.73338	cytoplasm,nucleus	K14843			GO:0000460 maturation of 5.8S rRNA; GO:0000463 maturation of LSU-rRNA from tricistronic rRNA transcript (SSU-rRNA, 5.8S rRNA, LSU-rRNA); GO:0000466 maturation of 5.8S rRNA from tricistronic rRNA transcript (SSU-rRNA, 5.8S rRNA, LSU-rRNA); GO:0000470 maturation of LSU-rRNA; GO:0006139 nucleobase-containing compound metabolic process; GO:0006364 rRNA processing; GO:0006396 RNA processing; GO:000672…	GO:0000793 condensed chromosome; GO:0005622 intracellular anatomical structure; GO:0005634 nucleus; GO:0005654 nucleoplasm; GO:0005694 chromosome; GO:0005730 nucleolus; GO:0005737 cytoplasm; GO:0005829 cytosol; GO:0030684 preribosome; GO:0030686 90S preribosome; GO:0030687 preribosome, large subunit precursor; GO:0031974 membrane-enclosed lumen; GO:0031981 nuclear lumen; GO:0032991 protein-contai…	GO:0003676 nucleic acid binding; GO:0003723 RNA binding; GO:0005488 binding; GO:0097159 organic cyclic compound binding; GO:1901363 heterocyclic compound binding;			A	KOG2481	Protein required for normal rRNA processing				R-HSA-6791226 Major pathway of rRNA processing in the nucleolus and cytosol;R-HSA-72312 rRNA processing;R-HSA-8868773 rRNA processing in the nucleus and cytosol;R-HSA-8953854 Metabolism of RNA	https://reactome.org/PathwayBrowser/#/R-HSA-6791226;https://reactome.org/PathwayBrowser/#/R-HSA-72312;https://reactome.org/PathwayBrowser/#/R-HSA-8868773;https://reactome.org/PathwayBrowser/#/R-HSA-8953854	MYC TARGETS V2	https://www.gsea-msigdb.org/gsea/msigdb/cards/HALLMARK_MYC_TARGETS_V2
O00541	550	K	1.88242	Up	Pescadillo homolog OS=Homo sapiens OX=9606 GN=PES1 PE=1 SV=1	PES1	1	3.69489e-06	105.81	2	YLYQK(1)IMFGK	-0.2811	8605.1	17258	0.687199	1.2936	cytoplasm,nucleus	K14843			GO:0000460 maturation of 5.8S rRNA; GO:0000463 maturation of LSU-rRNA from tricistronic rRNA transcript (SSU-rRNA, 5.8S rRNA, LSU-rRNA); GO:0000466 maturation of 5.8S rRNA from tricistronic rRNA transcript (SSU-rRNA, 5.8S rRNA, LSU-rRNA); GO:0000470 maturation of LSU-rRNA; GO:0006139 nucleobase-containing compound metabolic process; GO:0006364 rRNA processing; GO:0006396 RNA processing; GO:000672…	GO:0000793 condensed chromosome; GO:0005622 intracellular anatomical structure; GO:0005634 nucleus; GO:0005654 nucleoplasm; GO:0005694 chromosome; GO:0005730 nucleolus; GO:0005737 cytoplasm; GO:0005829 cytosol; GO:0030684 preribosome; GO:0030686 90S preribosome; GO:0030687 preribosome, large subunit precursor; GO:0031974 membrane-enclosed lumen; GO:0031981 nuclear lumen; GO:0032991 protein-contai…	GO:0003676 nucleic acid binding; GO:0003723 RNA binding; GO:0005488 binding; GO:0097159 organic cyclic compound binding; GO:1901363 heterocyclic compound binding;			A	KOG2481	Protein required for normal rRNA processing				R-HSA-6791226 Major pathway of rRNA processing in the nucleolus and cytosol;R-HSA-72312 rRNA processing;R-HSA-8868773 rRNA processing in the nucleus and cytosol;R-HSA-8953854 Metabolism of RNA	https://reactome.org/PathwayBrowser/#/R-HSA-6791226;https://reactome.org/PathwayBrowser/#/R-HSA-72312;https://reactome.org/PathwayBrowser/#/R-HSA-8868773;https://reactome.org/PathwayBrowser/#/R-HSA-8953854	MYC TARGETS V2	https://www.gsea-msigdb.org/gsea/msigdb/cards/HALLMARK_MYC_TARGETS_V2
O00560	288	K		None	Syntenin-1 OS=Homo sapiens OX=9606 GN=SDCBP PE=1 SV=1	SDCBP	1	3.77531e-06	108.91	2	MAPSIMK(1)SLMDHTIPEV	-1.6179	34508	22328			cytoskeleton	K17254			GO:0001558 regulation of cell growth; GO:0001775 cell activation; GO:0001932 regulation of protein phosphorylation; GO:0001934 positive regulation of protein phosphorylation; GO:0002090 regulation of receptor internalization; GO:0002091 negative regulation of receptor internalization; GO:0002252 immune effector process; GO:0002263 cell activation involved in immune response; GO:0002274 myeloid le…	GO:0000323 lytic vacuole; GO:0005576 extracellular region; GO:0005615 extracellular space; GO:0005622 intracellular anatomical structure; GO:0005634 nucleus; GO:0005635 nuclear envelope; GO:0005654 nucleoplasm; GO:0005737 cytoplasm; GO:0005764 lysosome; GO:0005766 primary lysosome; GO:0005773 vacuole; GO:0005775 vacuolar lumen; GO:0005829 cytosol; GO:0005856 cytoskeleton; GO:0005886 plasma membra…	GO:0001664 G protein-coupled receptor binding; GO:0005102 signaling receptor binding; GO:0005109 frizzled binding; GO:0005126 cytokine receptor binding; GO:0005137 interleukin-5 receptor binding; GO:0005488 binding; GO:0005515 protein binding; GO:0005543 phospholipid binding; GO:0005546 phosphatidylinositol-4,5-bisphosphate binding; GO:0008022 protein C-terminus binding; GO:0008092 cytoskeletal p…	PF00595	PF00595 PDZ domain	K	KOG0849	Transcription factor PRD and related proteins, contain PAX and HOX domains	WP2858 ECTODERM DIFFERENTIATION;WP3888 VEGFAVEGFR2 SIGNALING PATHWAY	http://www.wikipathways.org/instance/WP2858_r116763;http://www.wikipathways.org/instance/WP3888_r116782		R-HSA-1266738 Developmental Biology;R-HSA-168249 Innate Immune System;R-HSA-168256 Immune System;R-HSA-2682334 EPH-Ephrin signaling;R-HSA-373760 L1CAM interactions;R-HSA-3928664 Ephrin signaling;R-HSA-422475 Axon guidance;R-HSA-447043 Neurofascin interactions;R-HSA-5213460 RIPK1-mediated regulated necrosis;R-HSA-5218859 Regulated Necrosis;R-HSA-5357801 Programmed Cell Death;R-HSA-5675482 Regulati…	https://reactome.org/PathwayBrowser/#/R-HSA-1266738;https://reactome.org/PathwayBrowser/#/R-HSA-168249;https://reactome.org/PathwayBrowser/#/R-HSA-168256;https://reactome.org/PathwayBrowser/#/R-HSA-2682334;https://reactome.org/PathwayBrowser/#/R-HSA-373760;https://reactome.org/PathwayBrowser/#/R-HSA-3928664;https://reactome.org/PathwayBrowser/#/R-HSA-422475;https://reactome.org/PathwayBrowser/#/R…	DNA REPAIR;HEME METABOLISM	https://www.gsea-msigdb.org/gsea/msigdb/cards/HALLMARK_DNA_REPAIR;https://www.gsea-msigdb.org/gsea/msigdb/cards/HALLMARK_HEME_METABOLISM
O00566	185	K	1.18264	None	U3 small nucleolar ribonucleoprotein protein MPP10 OS=Homo sapiens OX=9606 GN=MPHOSPH10 PE=1 SV=2	MPHOSPH10	1	1.82851e-06	120.33	2	LEQQSK(1)VQNK	0.33658	13357	15403	0.91729	1.08482	nucleus	K14559	MPP10; U3 small nucleolar RNA-associated protein MPP10	hsa03008 Ribosome biogenesis in eukaryotes	GO:0000375 RNA splicing, via transesterification reactions; GO:0006139 nucleobase-containing compound metabolic process; GO:0006364 rRNA processing; GO:0006396 RNA processing; GO:0006725 cellular aromatic compound metabolic process; GO:0006807 nitrogen compound metabolic process; GO:0008152 metabolic process; GO:0008380 RNA splicing; GO:0009892 negative regulation of metabolic process; GO:0009987…	GO:0005622 intracellular anatomical structure; GO:0005634 nucleus; GO:0005654 nucleoplasm; GO:0005730 nucleolus; GO:0005732 sno(s)RNA-containing ribonucleoprotein complex; GO:0030684 preribosome; GO:0030686 90S preribosome; GO:0031974 membrane-enclosed lumen; GO:0031981 nuclear lumen; GO:0032040 small-subunit processome; GO:0032991 protein-containing complex; GO:0034457 Mpp10 complex; GO:0043226 …				A	KOG2600	U3 small nucleolar ribonucleoprotein (snoRNP) subunit - Mpp10p				R-HSA-6790901 rRNA modification in the nucleus and cytosol;R-HSA-6791226 Major pathway of rRNA processing in the nucleolus and cytosol;R-HSA-72312 rRNA processing;R-HSA-8868773 rRNA processing in the nucleus and cytosol;R-HSA-8953854 Metabolism of RNA	https://reactome.org/PathwayBrowser/#/R-HSA-6790901;https://reactome.org/PathwayBrowser/#/R-HSA-6791226;https://reactome.org/PathwayBrowser/#/R-HSA-72312;https://reactome.org/PathwayBrowser/#/R-HSA-8868773;https://reactome.org/PathwayBrowser/#/R-HSA-8953854	MYC TARGETS V2	https://www.gsea-msigdb.org/gsea/msigdb/cards/HALLMARK_MYC_TARGETS_V2
O00566	370	K		None	U3 small nucleolar ribonucleoprotein protein MPP10 OS=Homo sapiens OX=9606 GN=MPHOSPH10 PE=1 SV=2	MPHOSPH10	1	0.0100635	47.561	2	MNEK(1)IASLEK	4.4166	6392.6	0	0.987544		nucleus	K14559	MPP10; U3 small nucleolar RNA-associated protein MPP10	hsa03008 Ribosome biogenesis in eukaryotes	GO:0000375 RNA splicing, via transesterification reactions; GO:0006139 nucleobase-containing compound metabolic process; GO:0006364 rRNA processing; GO:0006396 RNA processing; GO:0006725 cellular aromatic compound metabolic process; GO:0006807 nitrogen compound metabolic process; GO:0008152 metabolic process; GO:0008380 RNA splicing; GO:0009892 negative regulation of metabolic process; GO:0009987…	GO:0005622 intracellular anatomical structure; GO:0005634 nucleus; GO:0005654 nucleoplasm; GO:0005730 nucleolus; GO:0005732 sno(s)RNA-containing ribonucleoprotein complex; GO:0030684 preribosome; GO:0030686 90S preribosome; GO:0031974 membrane-enclosed lumen; GO:0031981 nuclear lumen; GO:0032040 small-subunit processome; GO:0032991 protein-containing complex; GO:0034457 Mpp10 complex; GO:0043226 …				A	KOG2600	U3 small nucleolar ribonucleoprotein (snoRNP) subunit - Mpp10p				R-HSA-6790901 rRNA modification in the nucleus and cytosol;R-HSA-6791226 Major pathway of rRNA processing in the nucleolus and cytosol;R-HSA-72312 rRNA processing;R-HSA-8868773 rRNA processing in the nucleus and cytosol;R-HSA-8953854 Metabolism of RNA	https://reactome.org/PathwayBrowser/#/R-HSA-6790901;https://reactome.org/PathwayBrowser/#/R-HSA-6791226;https://reactome.org/PathwayBrowser/#/R-HSA-72312;https://reactome.org/PathwayBrowser/#/R-HSA-8868773;https://reactome.org/PathwayBrowser/#/R-HSA-8953854	MYC TARGETS V2	https://www.gsea-msigdb.org/gsea/msigdb/cards/HALLMARK_MYC_TARGETS_V2
O00566	466	K		None	U3 small nucleolar ribonucleoprotein protein MPP10 OS=Homo sapiens OX=9606 GN=MPHOSPH10 PE=1 SV=2	MPHOSPH10	1	0.0342708	47.915	2	SK(1)LSLAEIYEQEYIK	1.4391	0	7868.5		1.01277	nucleus	K14559	MPP10; U3 small nucleolar RNA-associated protein MPP10	hsa03008 Ribosome biogenesis in eukaryotes	GO:0000375 RNA splicing, via transesterification reactions; GO:0006139 nucleobase-containing compound metabolic process; GO:0006364 rRNA processing; GO:0006396 RNA processing; GO:0006725 cellular aromatic compound metabolic process; GO:0006807 nitrogen compound metabolic process; GO:0008152 metabolic process; GO:0008380 RNA splicing; GO:0009892 negative regulation of metabolic process; GO:0009987…	GO:0005622 intracellular anatomical structure; GO:0005634 nucleus; GO:0005654 nucleoplasm; GO:0005730 nucleolus; GO:0005732 sno(s)RNA-containing ribonucleoprotein complex; GO:0030684 preribosome; GO:0030686 90S preribosome; GO:0031974 membrane-enclosed lumen; GO:0031981 nuclear lumen; GO:0032040 small-subunit processome; GO:0032991 protein-containing complex; GO:0034457 Mpp10 complex; GO:0043226 …				A	KOG2600	U3 small nucleolar ribonucleoprotein (snoRNP) subunit - Mpp10p				R-HSA-6790901 rRNA modification in the nucleus and cytosol;R-HSA-6791226 Major pathway of rRNA processing in the nucleolus and cytosol;R-HSA-72312 rRNA processing;R-HSA-8868773 rRNA processing in the nucleus and cytosol;R-HSA-8953854 Metabolism of RNA	https://reactome.org/PathwayBrowser/#/R-HSA-6790901;https://reactome.org/PathwayBrowser/#/R-HSA-6791226;https://reactome.org/PathwayBrowser/#/R-HSA-72312;https://reactome.org/PathwayBrowser/#/R-HSA-8868773;https://reactome.org/PathwayBrowser/#/R-HSA-8953854	MYC TARGETS V2	https://www.gsea-msigdb.org/gsea/msigdb/cards/HALLMARK_MYC_TARGETS_V2
O00566	649	K	0.845707	None	U3 small nucleolar ribonucleoprotein protein MPP10 OS=Homo sapiens OX=9606 GN=MPHOSPH10 PE=1 SV=2	MPHOSPH10	1	1.0603e-05	100.07	2	SSQAFFSK(1)LQDQVK	-0.24456	52868	43597	1.08245	0.915439	nucleus	K14559	MPP10; U3 small nucleolar RNA-associated protein MPP10	hsa03008 Ribosome biogenesis in eukaryotes	GO:0000375 RNA splicing, via transesterification reactions; GO:0006139 nucleobase-containing compound metabolic process; GO:0006364 rRNA processing; GO:0006396 RNA processing; GO:0006725 cellular aromatic compound metabolic process; GO:0006807 nitrogen compound metabolic process; GO:0008152 metabolic process; GO:0008380 RNA splicing; GO:0009892 negative regulation of metabolic process; GO:0009987…	GO:0005622 intracellular anatomical structure; GO:0005634 nucleus; GO:0005654 nucleoplasm; GO:0005730 nucleolus; GO:0005732 sno(s)RNA-containing ribonucleoprotein complex; GO:0030684 preribosome; GO:0030686 90S preribosome; GO:0031974 membrane-enclosed lumen; GO:0031981 nuclear lumen; GO:0032040 small-subunit processome; GO:0032991 protein-containing complex; GO:0034457 Mpp10 complex; GO:0043226 …				A	KOG2600	U3 small nucleolar ribonucleoprotein (snoRNP) subunit - Mpp10p				R-HSA-6790901 rRNA modification in the nucleus and cytosol;R-HSA-6791226 Major pathway of rRNA processing in the nucleolus and cytosol;R-HSA-72312 rRNA processing;R-HSA-8868773 rRNA processing in the nucleus and cytosol;R-HSA-8953854 Metabolism of RNA	https://reactome.org/PathwayBrowser/#/R-HSA-6790901;https://reactome.org/PathwayBrowser/#/R-HSA-6791226;https://reactome.org/PathwayBrowser/#/R-HSA-72312;https://reactome.org/PathwayBrowser/#/R-HSA-8868773;https://reactome.org/PathwayBrowser/#/R-HSA-8953854	MYC TARGETS V2	https://www.gsea-msigdb.org/gsea/msigdb/cards/HALLMARK_MYC_TARGETS_V2
O00566	609	K		None	U3 small nucleolar ribonucleoprotein protein MPP10 OS=Homo sapiens OX=9606 GN=MPHOSPH10 PE=1 SV=2	MPHOSPH10	1	0.00426195	51.872	2	SSVDQAGK(1)YSK	0.34436	8475.8	0	0.987544		nucleus	K14559	MPP10; U3 small nucleolar RNA-associated protein MPP10	hsa03008 Ribosome biogenesis in eukaryotes	GO:0000375 RNA splicing, via transesterification reactions; GO:0006139 nucleobase-containing compound metabolic process; GO:0006364 rRNA processing; GO:0006396 RNA processing; GO:0006725 cellular aromatic compound metabolic process; GO:0006807 nitrogen compound metabolic process; GO:0008152 metabolic process; GO:0008380 RNA splicing; GO:0009892 negative regulation of metabolic process; GO:0009987…	GO:0005622 intracellular anatomical structure; GO:0005634 nucleus; GO:0005654 nucleoplasm; GO:0005730 nucleolus; GO:0005732 sno(s)RNA-containing ribonucleoprotein complex; GO:0030684 preribosome; GO:0030686 90S preribosome; GO:0031974 membrane-enclosed lumen; GO:0031981 nuclear lumen; GO:0032040 small-subunit processome; GO:0032991 protein-containing complex; GO:0034457 Mpp10 complex; GO:0043226 …				A	KOG2600	U3 small nucleolar ribonucleoprotein (snoRNP) subunit - Mpp10p				R-HSA-6790901 rRNA modification in the nucleus and cytosol;R-HSA-6791226 Major pathway of rRNA processing in the nucleolus and cytosol;R-HSA-72312 rRNA processing;R-HSA-8868773 rRNA processing in the nucleus and cytosol;R-HSA-8953854 Metabolism of RNA	https://reactome.org/PathwayBrowser/#/R-HSA-6790901;https://reactome.org/PathwayBrowser/#/R-HSA-6791226;https://reactome.org/PathwayBrowser/#/R-HSA-72312;https://reactome.org/PathwayBrowser/#/R-HSA-8868773;https://reactome.org/PathwayBrowser/#/R-HSA-8953854	MYC TARGETS V2	https://www.gsea-msigdb.org/gsea/msigdb/cards/HALLMARK_MYC_TARGETS_V2
O00567	533	K	0.769555	None	Nucleolar protein 56 OS=Homo sapiens OX=9606 GN=NOP56 PE=1 SV=4	NOP56	1	2.84266e-29	146.34	2	EELMSSDLEETAGSTSIPK(1)R	3.5438	54566	38894	1.12462	0.865456	nucleus	K14564	NOP56; nucleolar protein 56	hsa05017 Spinocerebellar ataxia; hsa03008 Ribosome biogenesis in eukaryotes	GO:0000154 rRNA modification; GO:0006139 nucleobase-containing compound metabolic process; GO:0006364 rRNA processing; GO:0006396 RNA processing; GO:0006725 cellular aromatic compound metabolic process; GO:0006807 nitrogen compound metabolic process; GO:0008152 metabolic process; GO:0009451 RNA modification; GO:0009987 cellular process; GO:0010467 gene expression; GO:0016070 RNA metabolic process…	GO:0001650 fibrillar center; GO:0005622 intracellular anatomical structure; GO:0005634 nucleus; GO:0005654 nucleoplasm; GO:0005730 nucleolus; GO:0005732 sno(s)RNA-containing ribonucleoprotein complex; GO:0030684 preribosome; GO:0031428 box C/D RNP complex; GO:0031974 membrane-enclosed lumen; GO:0031981 nuclear lumen; GO:0032040 small-subunit processome; GO:0032991 protein-containing complex; GO:0…	GO:0003676 nucleic acid binding; GO:0003723 RNA binding; GO:0005488 binding; GO:0005515 protein binding; GO:0019899 enzyme binding; GO:0030515 snoRNA binding; GO:0097159 organic cyclic compound binding; GO:1901363 heterocyclic compound binding; GO:1990226 histone methyltransferase binding;	PF08156	PF08156 NOP5NT (NUC127) domain	AJ	KOG2573	Ribosome biogenesis protein - Nop56p/Sik1p				R-HSA-390466 Chaperonin-mediated protein folding;R-HSA-390471 Association of TriC/CCT with target proteins during biosynthesis;R-HSA-391251 Protein folding;R-HSA-392499 Metabolism of proteins;R-HSA-6790901 rRNA modification in the nucleus and cytosol;R-HSA-6791226 Major pathway of rRNA processing in the nucleolus and cytosol;R-HSA-72312 rRNA processing;R-HSA-8868773 rRNA processing in the nucleus…	https://reactome.org/PathwayBrowser/#/R-HSA-390466;https://reactome.org/PathwayBrowser/#/R-HSA-390471;https://reactome.org/PathwayBrowser/#/R-HSA-391251;https://reactome.org/PathwayBrowser/#/R-HSA-392499;https://reactome.org/PathwayBrowser/#/R-HSA-6790901;https://reactome.org/PathwayBrowser/#/R-HSA-6791226;https://reactome.org/PathwayBrowser/#/R-HSA-72312;https://reactome.org/PathwayBrowser/#/R-H…	E2F TARGETS;MYC TARGETS V1;MYC TARGETS V2;UNFOLDED PROTEIN RESPONSE	https://www.gsea-msigdb.org/gsea/msigdb/cards/HALLMARK_E2F_TARGETS;https://www.gsea-msigdb.org/gsea/msigdb/cards/HALLMARK_MYC_TARGETS_V1;https://www.gsea-msigdb.org/gsea/msigdb/cards/HALLMARK_MYC_TARGETS_V2;https://www.gsea-msigdb.org/gsea/msigdb/cards/HALLMARK_UNFOLDED_PROTEIN_RESPONSE
O00567	578	K	0.871562	None	Nucleolar protein 56 OS=Homo sapiens OX=9606 GN=NOP56 PE=1 SV=4	NOP56	1	2.59119e-14	126.32	2	EEPVSSGPEEAVGK(1)SSSK	-2.3221	64510	52077	1.06583	0.928932	nucleus	K14564	NOP56; nucleolar protein 56	hsa05017 Spinocerebellar ataxia; hsa03008 Ribosome biogenesis in eukaryotes	GO:0000154 rRNA modification; GO:0006139 nucleobase-containing compound metabolic process; GO:0006364 rRNA processing; GO:0006396 RNA processing; GO:0006725 cellular aromatic compound metabolic process; GO:0006807 nitrogen compound metabolic process; GO:0008152 metabolic process; GO:0009451 RNA modification; GO:0009987 cellular process; GO:0010467 gene expression; GO:0016070 RNA metabolic process…	GO:0001650 fibrillar center; GO:0005622 intracellular anatomical structure; GO:0005634 nucleus; GO:0005654 nucleoplasm; GO:0005730 nucleolus; GO:0005732 sno(s)RNA-containing ribonucleoprotein complex; GO:0030684 preribosome; GO:0031428 box C/D RNP complex; GO:0031974 membrane-enclosed lumen; GO:0031981 nuclear lumen; GO:0032040 small-subunit processome; GO:0032991 protein-containing complex; GO:0…	GO:0003676 nucleic acid binding; GO:0003723 RNA binding; GO:0005488 binding; GO:0005515 protein binding; GO:0019899 enzyme binding; GO:0030515 snoRNA binding; GO:0097159 organic cyclic compound binding; GO:1901363 heterocyclic compound binding; GO:1990226 histone methyltransferase binding;	PF08156	PF08156 NOP5NT (NUC127) domain	AJ	KOG2573	Ribosome biogenesis protein - Nop56p/Sik1p				R-HSA-390466 Chaperonin-mediated protein folding;R-HSA-390471 Association of TriC/CCT with target proteins during biosynthesis;R-HSA-391251 Protein folding;R-HSA-392499 Metabolism of proteins;R-HSA-6790901 rRNA modification in the nucleus and cytosol;R-HSA-6791226 Major pathway of rRNA processing in the nucleolus and cytosol;R-HSA-72312 rRNA processing;R-HSA-8868773 rRNA processing in the nucleus…	https://reactome.org/PathwayBrowser/#/R-HSA-390466;https://reactome.org/PathwayBrowser/#/R-HSA-390471;https://reactome.org/PathwayBrowser/#/R-HSA-391251;https://reactome.org/PathwayBrowser/#/R-HSA-392499;https://reactome.org/PathwayBrowser/#/R-HSA-6790901;https://reactome.org/PathwayBrowser/#/R-HSA-6791226;https://reactome.org/PathwayBrowser/#/R-HSA-72312;https://reactome.org/PathwayBrowser/#/R-H…	E2F TARGETS;MYC TARGETS V1;MYC TARGETS V2;UNFOLDED PROTEIN RESPONSE	https://www.gsea-msigdb.org/gsea/msigdb/cards/HALLMARK_E2F_TARGETS;https://www.gsea-msigdb.org/gsea/msigdb/cards/HALLMARK_MYC_TARGETS_V1;https://www.gsea-msigdb.org/gsea/msigdb/cards/HALLMARK_MYC_TARGETS_V2;https://www.gsea-msigdb.org/gsea/msigdb/cards/HALLMARK_UNFOLDED_PROTEIN_RESPONSE
O00567	589	K	1.44799	None	Nucleolar protein 56 OS=Homo sapiens OX=9606 GN=NOP56 PE=1 SV=4	NOP56	1	0.002988	91.783	2	FHK(1)ASQED	-0.26046	131250	176030	0.822762	1.19135	nucleus	K14564	NOP56; nucleolar protein 56	hsa05017 Spinocerebellar ataxia; hsa03008 Ribosome biogenesis in eukaryotes	GO:0000154 rRNA modification; GO:0006139 nucleobase-containing compound metabolic process; GO:0006364 rRNA processing; GO:0006396 RNA processing; GO:0006725 cellular aromatic compound metabolic process; GO:0006807 nitrogen compound metabolic process; GO:0008152 metabolic process; GO:0009451 RNA modification; GO:0009987 cellular process; GO:0010467 gene expression; GO:0016070 RNA metabolic process…	GO:0001650 fibrillar center; GO:0005622 intracellular anatomical structure; GO:0005634 nucleus; GO:0005654 nucleoplasm; GO:0005730 nucleolus; GO:0005732 sno(s)RNA-containing ribonucleoprotein complex; GO:0030684 preribosome; GO:0031428 box C/D RNP complex; GO:0031974 membrane-enclosed lumen; GO:0031981 nuclear lumen; GO:0032040 small-subunit processome; GO:0032991 protein-containing complex; GO:0…	GO:0003676 nucleic acid binding; GO:0003723 RNA binding; GO:0005488 binding; GO:0005515 protein binding; GO:0019899 enzyme binding; GO:0030515 snoRNA binding; GO:0097159 organic cyclic compound binding; GO:1901363 heterocyclic compound binding; GO:1990226 histone methyltransferase binding;	PF08156	PF08156 NOP5NT (NUC127) domain	AJ	KOG2573	Ribosome biogenesis protein - Nop56p/Sik1p				R-HSA-390466 Chaperonin-mediated protein folding;R-HSA-390471 Association of TriC/CCT with target proteins during biosynthesis;R-HSA-391251 Protein folding;R-HSA-392499 Metabolism of proteins;R-HSA-6790901 rRNA modification in the nucleus and cytosol;R-HSA-6791226 Major pathway of rRNA processing in the nucleolus and cytosol;R-HSA-72312 rRNA processing;R-HSA-8868773 rRNA processing in the nucleus…	https://reactome.org/PathwayBrowser/#/R-HSA-390466;https://reactome.org/PathwayBrowser/#/R-HSA-390471;https://reactome.org/PathwayBrowser/#/R-HSA-391251;https://reactome.org/PathwayBrowser/#/R-HSA-392499;https://reactome.org/PathwayBrowser/#/R-HSA-6790901;https://reactome.org/PathwayBrowser/#/R-HSA-6791226;https://reactome.org/PathwayBrowser/#/R-HSA-72312;https://reactome.org/PathwayBrowser/#/R-H…	E2F TARGETS;MYC TARGETS V1;MYC TARGETS V2;UNFOLDED PROTEIN RESPONSE	https://www.gsea-msigdb.org/gsea/msigdb/cards/HALLMARK_E2F_TARGETS;https://www.gsea-msigdb.org/gsea/msigdb/cards/HALLMARK_MYC_TARGETS_V1;https://www.gsea-msigdb.org/gsea/msigdb/cards/HALLMARK_MYC_TARGETS_V2;https://www.gsea-msigdb.org/gsea/msigdb/cards/HALLMARK_UNFOLDED_PROTEIN_RESPONSE
O00567	540	K	1.38913	None	Nucleolar protein 56 OS=Homo sapiens OX=9606 GN=NOP56 PE=1 SV=4	NOP56	1	0.000158289	61.067	2	STPK(1)EETVNDPEEAGHR	-1.7932	33336	42892	0.84238	1.17017	nucleus	K14564	NOP56; nucleolar protein 56	hsa05017 Spinocerebellar ataxia; hsa03008 Ribosome biogenesis in eukaryotes	GO:0000154 rRNA modification; GO:0006139 nucleobase-containing compound metabolic process; GO:0006364 rRNA processing; GO:0006396 RNA processing; GO:0006725 cellular aromatic compound metabolic process; GO:0006807 nitrogen compound metabolic process; GO:0008152 metabolic process; GO:0009451 RNA modification; GO:0009987 cellular process; GO:0010467 gene expression; GO:0016070 RNA metabolic process…	GO:0001650 fibrillar center; GO:0005622 intracellular anatomical structure; GO:0005634 nucleus; GO:0005654 nucleoplasm; GO:0005730 nucleolus; GO:0005732 sno(s)RNA-containing ribonucleoprotein complex; GO:0030684 preribosome; GO:0031428 box C/D RNP complex; GO:0031974 membrane-enclosed lumen; GO:0031981 nuclear lumen; GO:0032040 small-subunit processome; GO:0032991 protein-containing complex; GO:0…	GO:0003676 nucleic acid binding; GO:0003723 RNA binding; GO:0005488 binding; GO:0005515 protein binding; GO:0019899 enzyme binding; GO:0030515 snoRNA binding; GO:0097159 organic cyclic compound binding; GO:1901363 heterocyclic compound binding; GO:1990226 histone methyltransferase binding;	PF08156	PF08156 NOP5NT (NUC127) domain	AJ	KOG2573	Ribosome biogenesis protein - Nop56p/Sik1p				R-HSA-390466 Chaperonin-mediated protein folding;R-HSA-390471 Association of TriC/CCT with target proteins during biosynthesis;R-HSA-391251 Protein folding;R-HSA-392499 Metabolism of proteins;R-HSA-6790901 rRNA modification in the nucleus and cytosol;R-HSA-6791226 Major pathway of rRNA processing in the nucleolus and cytosol;R-HSA-72312 rRNA processing;R-HSA-8868773 rRNA processing in the nucleus…	https://reactome.org/PathwayBrowser/#/R-HSA-390466;https://reactome.org/PathwayBrowser/#/R-HSA-390471;https://reactome.org/PathwayBrowser/#/R-HSA-391251;https://reactome.org/PathwayBrowser/#/R-HSA-392499;https://reactome.org/PathwayBrowser/#/R-HSA-6790901;https://reactome.org/PathwayBrowser/#/R-HSA-6791226;https://reactome.org/PathwayBrowser/#/R-HSA-72312;https://reactome.org/PathwayBrowser/#/R-H…	E2F TARGETS;MYC TARGETS V1;MYC TARGETS V2;UNFOLDED PROTEIN RESPONSE	https://www.gsea-msigdb.org/gsea/msigdb/cards/HALLMARK_E2F_TARGETS;https://www.gsea-msigdb.org/gsea/msigdb/cards/HALLMARK_MYC_TARGETS_V1;https://www.gsea-msigdb.org/gsea/msigdb/cards/HALLMARK_MYC_TARGETS_V2;https://www.gsea-msigdb.org/gsea/msigdb/cards/HALLMARK_UNFOLDED_PROTEIN_RESPONSE
O00567	375	K	1.41193	None	Nucleolar protein 56 OS=Homo sapiens OX=9606 GN=NOP56 PE=1 SV=4	NOP56	1	1.35649e-07	117.99	2	YLANK(1)CSIASR	-1.2596	30879	40383	0.834669	1.1785	nucleus	K14564	NOP56; nucleolar protein 56	hsa05017 Spinocerebellar ataxia; hsa03008 Ribosome biogenesis in eukaryotes	GO:0000154 rRNA modification; GO:0006139 nucleobase-containing compound metabolic process; GO:0006364 rRNA processing; GO:0006396 RNA processing; GO:0006725 cellular aromatic compound metabolic process; GO:0006807 nitrogen compound metabolic process; GO:0008152 metabolic process; GO:0009451 RNA modification; GO:0009987 cellular process; GO:0010467 gene expression; GO:0016070 RNA metabolic process…	GO:0001650 fibrillar center; GO:0005622 intracellular anatomical structure; GO:0005634 nucleus; GO:0005654 nucleoplasm; GO:0005730 nucleolus; GO:0005732 sno(s)RNA-containing ribonucleoprotein complex; GO:0030684 preribosome; GO:0031428 box C/D RNP complex; GO:0031974 membrane-enclosed lumen; GO:0031981 nuclear lumen; GO:0032040 small-subunit processome; GO:0032991 protein-containing complex; GO:0…	GO:0003676 nucleic acid binding; GO:0003723 RNA binding; GO:0005488 binding; GO:0005515 protein binding; GO:0019899 enzyme binding; GO:0030515 snoRNA binding; GO:0097159 organic cyclic compound binding; GO:1901363 heterocyclic compound binding; GO:1990226 histone methyltransferase binding;	PF08156	PF08156 NOP5NT (NUC127) domain	AJ	KOG2573	Ribosome biogenesis protein - Nop56p/Sik1p				R-HSA-390466 Chaperonin-mediated protein folding;R-HSA-390471 Association of TriC/CCT with target proteins during biosynthesis;R-HSA-391251 Protein folding;R-HSA-392499 Metabolism of proteins;R-HSA-6790901 rRNA modification in the nucleus and cytosol;R-HSA-6791226 Major pathway of rRNA processing in the nucleolus and cytosol;R-HSA-72312 rRNA processing;R-HSA-8868773 rRNA processing in the nucleus…	https://reactome.org/PathwayBrowser/#/R-HSA-390466;https://reactome.org/PathwayBrowser/#/R-HSA-390471;https://reactome.org/PathwayBrowser/#/R-HSA-391251;https://reactome.org/PathwayBrowser/#/R-HSA-392499;https://reactome.org/PathwayBrowser/#/R-HSA-6790901;https://reactome.org/PathwayBrowser/#/R-HSA-6791226;https://reactome.org/PathwayBrowser/#/R-HSA-72312;https://reactome.org/PathwayBrowser/#/R-H…	E2F TARGETS;MYC TARGETS V1;MYC TARGETS V2;UNFOLDED PROTEIN RESPONSE	https://www.gsea-msigdb.org/gsea/msigdb/cards/HALLMARK_E2F_TARGETS;https://www.gsea-msigdb.org/gsea/msigdb/cards/HALLMARK_MYC_TARGETS_V1;https://www.gsea-msigdb.org/gsea/msigdb/cards/HALLMARK_MYC_TARGETS_V2;https://www.gsea-msigdb.org/gsea/msigdb/cards/HALLMARK_UNFOLDED_PROTEIN_RESPONSE
O00571	66	K	1.67183	Up	ATP-dependent RNA helicase DDX3X OS=Homo sapiens OX=9606 GN=DDX3X PE=1 SV=3	DDX3X	1	0.00197878	67.548	2	DK(1)DAYSSFGSR	-0.41452	53323	92299	0.745295	1.24601	nucleus	K11594	DDX3X; ATP-dependent RNA helicase DDX3X [EC:3.6.4.13]	hsa04622 RIG-I-like receptor signaling pathway; hsa05161 Hepatitis B; hsa05203 Viral carcinogenesis	GO:0000003 reproduction; GO:0000070 mitotic sister chromatid segregation; GO:0000278 mitotic cell cycle; GO:0000280 nuclear division; GO:0000819 sister chromatid segregation; GO:0001558 regulation of cell growth; GO:0001775 cell activation; GO:0001817 regulation of cytokine production; GO:0001819 positive regulation of cytokine production; GO:0001932 regulation of protein phosphorylation; GO:0001…	GO:0005576 extracellular region; GO:0005622 intracellular anatomical structure; GO:0005634 nucleus; GO:0005654 nucleoplasm; GO:0005730 nucleolus; GO:0005737 cytoplasm; GO:0005739 mitochondrion; GO:0005740 mitochondrial envelope; GO:0005741 mitochondrial outer membrane; GO:0005829 cytosol; GO:0010494 cytoplasmic stress granule; GO:0012505 endomembrane system; GO:0016020 membrane; GO:0016442 RISC c…	GO:0003676 nucleic acid binding; GO:0003677 DNA binding; GO:0003678 DNA helicase activity; GO:0003723 RNA binding; GO:0003724 RNA helicase activity; GO:0003725 double-stranded RNA binding; GO:0003727 single-stranded RNA binding; GO:0003729 mRNA binding; GO:0003824 catalytic activity; GO:0003924 GTPase activity; GO:0004386 helicase activity; GO:0005488 binding; GO:0005515 protein binding; GO:00080…	PF00270; PF00271	PF00270 DEAD/DEAH box helicase; PF00271 Helicase conserved C-terminal domain	A	KOG0335	ATP-dependent RNA helicase	WP4666 HEPATITIS B INFECTION;WP3865 NOVEL INTRACELLULAR COMPONENTS OF RIGILIKE RECEPTOR RLR PATHWAY	http://www.wikipathways.org/instance/WP4666_r119241;http://www.wikipathways.org/instance/WP3865_r106524		R-HSA-168249 Innate Immune System;R-HSA-168256 Immune System;R-HSA-6798695 Neutrophil degranulation	https://reactome.org/PathwayBrowser/#/R-HSA-168249;https://reactome.org/PathwayBrowser/#/R-HSA-168256;https://reactome.org/PathwayBrowser/#/R-HSA-6798695
O00571	64	K	1.65169	Up	ATP-dependent RNA helicase DDX3X OS=Homo sapiens OX=9606 GN=DDX3X PE=1 SV=3	DDX3X	1	5.08146e-05	70.389	2	DSSGWSSSK(1)DK	-0.84196	25853	44211	0.751028	1.24047	nucleus	K11594	DDX3X; ATP-dependent RNA helicase DDX3X [EC:3.6.4.13]	hsa04622 RIG-I-like receptor signaling pathway; hsa05161 Hepatitis B; hsa05203 Viral carcinogenesis	GO:0000003 reproduction; GO:0000070 mitotic sister chromatid segregation; GO:0000278 mitotic cell cycle; GO:0000280 nuclear division; GO:0000819 sister chromatid segregation; GO:0001558 regulation of cell growth; GO:0001775 cell activation; GO:0001817 regulation of cytokine production; GO:0001819 positive regulation of cytokine production; GO:0001932 regulation of protein phosphorylation; GO:0001…	GO:0005576 extracellular region; GO:0005622 intracellular anatomical structure; GO:0005634 nucleus; GO:0005654 nucleoplasm; GO:0005730 nucleolus; GO:0005737 cytoplasm; GO:0005739 mitochondrion; GO:0005740 mitochondrial envelope; GO:0005741 mitochondrial outer membrane; GO:0005829 cytosol; GO:0010494 cytoplasmic stress granule; GO:0012505 endomembrane system; GO:0016020 membrane; GO:0016442 RISC c…	GO:0003676 nucleic acid binding; GO:0003677 DNA binding; GO:0003678 DNA helicase activity; GO:0003723 RNA binding; GO:0003724 RNA helicase activity; GO:0003725 double-stranded RNA binding; GO:0003727 single-stranded RNA binding; GO:0003729 mRNA binding; GO:0003824 catalytic activity; GO:0003924 GTPase activity; GO:0004386 helicase activity; GO:0005488 binding; GO:0005515 protein binding; GO:00080…	PF00270; PF00271	PF00270 DEAD/DEAH box helicase; PF00271 Helicase conserved C-terminal domain	A	KOG0335	ATP-dependent RNA helicase	WP4666 HEPATITIS B INFECTION;WP3865 NOVEL INTRACELLULAR COMPONENTS OF RIGILIKE RECEPTOR RLR PATHWAY	http://www.wikipathways.org/instance/WP4666_r119241;http://www.wikipathways.org/instance/WP3865_r106524		R-HSA-168249 Innate Immune System;R-HSA-168256 Immune System;R-HSA-6798695 Neutrophil degranulation	https://reactome.org/PathwayBrowser/#/R-HSA-168249;https://reactome.org/PathwayBrowser/#/R-HSA-168256;https://reactome.org/PathwayBrowser/#/R-HSA-6798695
O00571	55	K	1.53868	Up	ATP-dependent RNA helicase DDX3X OS=Homo sapiens OX=9606 GN=DDX3X PE=1 SV=3	DDX3X	1	5.56563e-21	140.01	2	GFYDK(1)DSSGWSSSK	0.64288	60140	95808	0.784917	1.20774	nucleus	K11594	DDX3X; ATP-dependent RNA helicase DDX3X [EC:3.6.4.13]	hsa04622 RIG-I-like receptor signaling pathway; hsa05161 Hepatitis B; hsa05203 Viral carcinogenesis	GO:0000003 reproduction; GO:0000070 mitotic sister chromatid segregation; GO:0000278 mitotic cell cycle; GO:0000280 nuclear division; GO:0000819 sister chromatid segregation; GO:0001558 regulation of cell growth; GO:0001775 cell activation; GO:0001817 regulation of cytokine production; GO:0001819 positive regulation of cytokine production; GO:0001932 regulation of protein phosphorylation; GO:0001…	GO:0005576 extracellular region; GO:0005622 intracellular anatomical structure; GO:0005634 nucleus; GO:0005654 nucleoplasm; GO:0005730 nucleolus; GO:0005737 cytoplasm; GO:0005739 mitochondrion; GO:0005740 mitochondrial envelope; GO:0005741 mitochondrial outer membrane; GO:0005829 cytosol; GO:0010494 cytoplasmic stress granule; GO:0012505 endomembrane system; GO:0016020 membrane; GO:0016442 RISC c…	GO:0003676 nucleic acid binding; GO:0003677 DNA binding; GO:0003678 DNA helicase activity; GO:0003723 RNA binding; GO:0003724 RNA helicase activity; GO:0003725 double-stranded RNA binding; GO:0003727 single-stranded RNA binding; GO:0003729 mRNA binding; GO:0003824 catalytic activity; GO:0003924 GTPase activity; GO:0004386 helicase activity; GO:0005488 binding; GO:0005515 protein binding; GO:00080…	PF00270; PF00271	PF00270 DEAD/DEAH box helicase; PF00271 Helicase conserved C-terminal domain	A	KOG0335	ATP-dependent RNA helicase	WP4666 HEPATITIS B INFECTION;WP3865 NOVEL INTRACELLULAR COMPONENTS OF RIGILIKE RECEPTOR RLR PATHWAY	http://www.wikipathways.org/instance/WP4666_r119241;http://www.wikipathways.org/instance/WP3865_r106524		R-HSA-168249 Innate Immune System;R-HSA-168256 Immune System;R-HSA-6798695 Neutrophil degranulation	https://reactome.org/PathwayBrowser/#/R-HSA-168249;https://reactome.org/PathwayBrowser/#/R-HSA-168256;https://reactome.org/PathwayBrowser/#/R-HSA-6798695
O00571	81	K	1.62052	Up	ATP-dependent RNA helicase DDX3X OS=Homo sapiens OX=9606 GN=DDX3X PE=1 SV=3	DDX3X	1	0.00106885	63.397	2	GK(1)SSFFSDR	-0.50838	150160	251940	0.760082	1.23173	nucleus	K11594	DDX3X; ATP-dependent RNA helicase DDX3X [EC:3.6.4.13]	hsa04622 RIG-I-like receptor signaling pathway; hsa05161 Hepatitis B; hsa05203 Viral carcinogenesis	GO:0000003 reproduction; GO:0000070 mitotic sister chromatid segregation; GO:0000278 mitotic cell cycle; GO:0000280 nuclear division; GO:0000819 sister chromatid segregation; GO:0001558 regulation of cell growth; GO:0001775 cell activation; GO:0001817 regulation of cytokine production; GO:0001819 positive regulation of cytokine production; GO:0001932 regulation of protein phosphorylation; GO:0001…	GO:0005576 extracellular region; GO:0005622 intracellular anatomical structure; GO:0005634 nucleus; GO:0005654 nucleoplasm; GO:0005730 nucleolus; GO:0005737 cytoplasm; GO:0005739 mitochondrion; GO:0005740 mitochondrial envelope; GO:0005741 mitochondrial outer membrane; GO:0005829 cytosol; GO:0010494 cytoplasmic stress granule; GO:0012505 endomembrane system; GO:0016020 membrane; GO:0016442 RISC c…	GO:0003676 nucleic acid binding; GO:0003677 DNA binding; GO:0003678 DNA helicase activity; GO:0003723 RNA binding; GO:0003724 RNA helicase activity; GO:0003725 double-stranded RNA binding; GO:0003727 single-stranded RNA binding; GO:0003729 mRNA binding; GO:0003824 catalytic activity; GO:0003924 GTPase activity; GO:0004386 helicase activity; GO:0005488 binding; GO:0005515 protein binding; GO:00080…	PF00270; PF00271	PF00270 DEAD/DEAH box helicase; PF00271 Helicase conserved C-terminal domain	A	KOG0335	ATP-dependent RNA helicase	WP4666 HEPATITIS B INFECTION;WP3865 NOVEL INTRACELLULAR COMPONENTS OF RIGILIKE RECEPTOR RLR PATHWAY	http://www.wikipathways.org/instance/WP4666_r119241;http://www.wikipathways.org/instance/WP3865_r106524		R-HSA-168249 Innate Immune System;R-HSA-168256 Immune System;R-HSA-6798695 Neutrophil degranulation	https://reactome.org/PathwayBrowser/#/R-HSA-168249;https://reactome.org/PathwayBrowser/#/R-HSA-168256;https://reactome.org/PathwayBrowser/#/R-HSA-6798695
O00571	118	K	1.40291	None	ATP-dependent RNA helicase DDX3X OS=Homo sapiens OX=9606 GN=DDX3X PE=1 SV=3	DDX3X	1	0.00383399	84.368	2	SGFGK(1)FER	-0.24018	93266	135470	0.829907	1.16429	nucleus	K11594	DDX3X; ATP-dependent RNA helicase DDX3X [EC:3.6.4.13]	hsa04622 RIG-I-like receptor signaling pathway; hsa05161 Hepatitis B; hsa05203 Viral carcinogenesis	GO:0000003 reproduction; GO:0000070 mitotic sister chromatid segregation; GO:0000278 mitotic cell cycle; GO:0000280 nuclear division; GO:0000819 sister chromatid segregation; GO:0001558 regulation of cell growth; GO:0001775 cell activation; GO:0001817 regulation of cytokine production; GO:0001819 positive regulation of cytokine production; GO:0001932 regulation of protein phosphorylation; GO:0001…	GO:0005576 extracellular region; GO:0005622 intracellular anatomical structure; GO:0005634 nucleus; GO:0005654 nucleoplasm; GO:0005730 nucleolus; GO:0005737 cytoplasm; GO:0005739 mitochondrion; GO:0005740 mitochondrial envelope; GO:0005741 mitochondrial outer membrane; GO:0005829 cytosol; GO:0010494 cytoplasmic stress granule; GO:0012505 endomembrane system; GO:0016020 membrane; GO:0016442 RISC c…	GO:0003676 nucleic acid binding; GO:0003677 DNA binding; GO:0003678 DNA helicase activity; GO:0003723 RNA binding; GO:0003724 RNA helicase activity; GO:0003725 double-stranded RNA binding; GO:0003727 single-stranded RNA binding; GO:0003729 mRNA binding; GO:0003824 catalytic activity; GO:0003924 GTPase activity; GO:0004386 helicase activity; GO:0005488 binding; GO:0005515 protein binding; GO:00080…	PF00270; PF00271	PF00270 DEAD/DEAH box helicase; PF00271 Helicase conserved C-terminal domain	A	KOG0335	ATP-dependent RNA helicase	WP4666 HEPATITIS B INFECTION;WP3865 NOVEL INTRACELLULAR COMPONENTS OF RIGILIKE RECEPTOR RLR PATHWAY	http://www.wikipathways.org/instance/WP4666_r119241;http://www.wikipathways.org/instance/WP3865_r106524		R-HSA-168249 Innate Immune System;R-HSA-168256 Immune System;R-HSA-6798695 Neutrophil degranulation	https://reactome.org/PathwayBrowser/#/R-HSA-168249;https://reactome.org/PathwayBrowser/#/R-HSA-168256;https://reactome.org/PathwayBrowser/#/R-HSA-6798695
O00622	291	K		None	CCN family member 1 OS=Homo sapiens OX=9606 GN=CCN1 PE=1 SV=1	CCN1	1	0.017068	73.637	2	K(1)SPEPVR	-11.565	50371	86497			extracellular	K06829			GO:0000003 reproduction; GO:0001501 skeletal system development; GO:0001503 ossification; GO:0001525 angiogenesis; GO:0001568 blood vessel development; GO:0001649 osteoblast differentiation; GO:0001701 in utero embryonic development; GO:0001890 placenta development; GO:0001892 embryonic placenta development; GO:0001932 regulation of protein phosphorylation; GO:0001934 positive regulation of prote…	GO:0005576 extracellular region; GO:0005615 extracellular space; GO:0005622 intracellular anatomical structure; GO:0005737 cytoplasm; GO:0005783 endoplasmic reticulum; GO:0005788 endoplasmic reticulum lumen; GO:0005829 cytosol; GO:0012505 endomembrane system; GO:0031012 extracellular matrix; GO:0031974 membrane-enclosed lumen; GO:0043226 organelle; GO:0043227 membrane-bounded organelle; GO:004322…	GO:0005102 signaling receptor binding; GO:0005178 integrin binding; GO:0005488 binding; GO:0005515 protein binding; GO:0005539 glycosaminoglycan binding; GO:0008201 heparin binding; GO:0043167 ion binding; GO:0043168 anion binding; GO:0044877 protein-containing complex binding; GO:0050839 cell adhesion molecule binding; GO:0050840 extracellular matrix binding; GO:0097367 carbohydrate derivative b…	PF00219; PF00093; PF19035; PF00007	PF00219 Insulin-like growth factor binding protein; PF00093 von Willebrand factor type C domain; PF19035 CCN3 Nov like TSP1 domain; PF00007 Cystine-knot domain				WP516 HYPERTROPHY MODEL;WP2374 ONCOSTATIN M SIGNALING PATHWAY;WP3888 VEGFAVEGFR2 SIGNALING PATHWAY	http://www.wikipathways.org/instance/WP516_r117755;http://www.wikipathways.org/instance/WP2374_r120781;http://www.wikipathways.org/instance/WP3888_r116782		R-HSA-381426 Regulation of Insulin-like Growth Factor (IGF) transport and uptake by Insulin-like Growth Factor Binding Proteins (IGFBPs);R-HSA-392499 Metabolism of proteins;R-HSA-597592 Post-translational protein modification;R-HSA-8957275 Post-translational protein phosphorylation	https://reactome.org/PathwayBrowser/#/R-HSA-381426;https://reactome.org/PathwayBrowser/#/R-HSA-392499;https://reactome.org/PathwayBrowser/#/R-HSA-597592;https://reactome.org/PathwayBrowser/#/R-HSA-8957275	EPITHELIAL MESENCHYMAL TRANSITION;HYPOXIA;TNFA SIGNALING VIA NFKB;UV RESPONSE DN	https://www.gsea-msigdb.org/gsea/msigdb/cards/HALLMARK_EPITHELIAL_MESENCHYMAL_TRANSITION;https://www.gsea-msigdb.org/gsea/msigdb/cards/HALLMARK_HYPOXIA;https://www.gsea-msigdb.org/gsea/msigdb/cards/HALLMARK_TNFA_SIGNALING_VIA_NFKB;https://www.gsea-msigdb.org/gsea/msigdb/cards/HALLMARK_UV_RESPONSE_DN
O00767	196	K		None	Stearoyl-CoA desaturase OS=Homo sapiens OX=9606 GN=SCD PE=1 SV=2	SCD	1	0.0229407	48.363	2	EK(1)GSTLDLSDLEAEK	-1.7546	0	4858.6		0.772317	cytoplasm	K00507	SCD; stearoyl-CoA desaturase (Delta-9 desaturase) [EC:1.14.19.1]	hsa04936 Alcoholic liver disease; hsa03320 PPAR signaling pathway; hsa01040 Biosynthesis of unsaturated fatty acids; hsa01212 Fatty acid metabolism; hsa04152 AMPK signaling pathway; hsa01100 Metabolic pathways	GO:0000003 reproduction; GO:0000278 mitotic cell cycle; GO:0000281 mitotic cytokinesis; GO:0000910 cytokinesis; GO:0001101 response to acid chemical; GO:0001676 long-chain fatty acid metabolic process; GO:0002376 immune system process; GO:0006082 organic acid metabolic process; GO:0006139 nucleobase-containing compound metabolic process; GO:0006163 purine nucleotide metabolic process; GO:0006164 …	GO:0005622 intracellular anatomical structure; GO:0005634 nucleus; GO:0005730 nucleolus; GO:0005737 cytoplasm; GO:0005783 endoplasmic reticulum; GO:0005789 endoplasmic reticulum membrane; GO:0012505 endomembrane system; GO:0016020 membrane; GO:0016021 integral component of membrane; GO:0030176 integral component of endoplasmic reticulum membrane; GO:0031224 intrinsic component of membrane; GO:003…	GO:0003824 catalytic activity; GO:0004768 stearoyl-CoA 9-desaturase activity; GO:0005488 binding; GO:0005506 iron ion binding; GO:0016215 acyl-CoA desaturase activity; GO:0016491 oxidoreductase activity; GO:0016705 oxidoreductase activity, acting on paired donors, with incorporation or reduction of molecular oxygen; GO:0016717 oxidoreductase activity, acting on paired donors, with oxidation of a …			I	KOG1600	Fatty acid desaturase	WP236 ADIPOGENESIS;WP3915 ANGIOPOIETINLIKE PROTEIN 8 REGULATORY PATHWAY;WP4718 CHOLESTEROL METABOLISM WITH BLOCH AND KANDUTSCHRUSSELL PATHWAYS;WP357 FATTY ACID BIOSYNTHESIS;WP2874 LIVER X RECEPTOR PATHWAY;WP2882 NUCLEAR RECEPTORS METAPATHWAY;WP4724 OMEGA9 FATTY ACID SYNTHESIS;WP3942 PPAR SIGNALING PATHWAY;WP2011 SREBF AND MIR33 IN CHOLESTEROL AND LIPID HOMEOSTASIS;WP1982 STEROL REGULATORY ELEMENT…	http://www.wikipathways.org/instance/WP236_r105873;http://www.wikipathways.org/instance/WP3915_r120659;http://www.wikipathways.org/instance/WP4718_r119764;http://www.wikipathways.org/instance/WP357_r117722;http://www.wikipathways.org/instance/WP2874_r116465;http://www.wikipathways.org/instance/WP2882_r117808;http://www.wikipathways.org/instance/WP4724_r117812;http://www.wikipathways.org/instance/…		R-HSA-1430728 Metabolism;R-HSA-162582 Signal Transduction;R-HSA-1655829 Regulation of cholesterol biosynthesis by SREBP (SREBF);R-HSA-2426168 Activation of gene expression by SREBF (SREBP);R-HSA-556833 Metabolism of lipids;R-HSA-75105 Fatty acyl-CoA biosynthesis;R-HSA-8957322 Metabolism of steroids;R-HSA-8978868 Fatty acid metabolism;R-HSA-9006931 Signaling by Nuclear Receptors;R-HSA-9024446 NR1H…	https://reactome.org/PathwayBrowser/#/R-HSA-1430728;https://reactome.org/PathwayBrowser/#/R-HSA-162582;https://reactome.org/PathwayBrowser/#/R-HSA-1655829;https://reactome.org/PathwayBrowser/#/R-HSA-2426168;https://reactome.org/PathwayBrowser/#/R-HSA-556833;https://reactome.org/PathwayBrowser/#/R-HSA-75105;https://reactome.org/PathwayBrowser/#/R-HSA-8957322;https://reactome.org/PathwayBrowser/#/R…	ANDROGEN RESPONSE;CHOLESTEROL HOMEOSTASIS;MTORC1 SIGNALING;MYOGENESIS	https://www.gsea-msigdb.org/gsea/msigdb/cards/HALLMARK_ANDROGEN_RESPONSE;https://www.gsea-msigdb.org/gsea/msigdb/cards/HALLMARK_CHOLESTEROL_HOMEOSTASIS;https://www.gsea-msigdb.org/gsea/msigdb/cards/HALLMARK_MTORC1_SIGNALING;https://www.gsea-msigdb.org/gsea/msigdb/cards/HALLMARK_MYOGENESIS
O14497	1124	K	1.10923	None	AT-rich interactive domain-containing protein 1A OS=Homo sapiens OX=9606 GN=ARID1A PE=1 SV=3	ARID1A	1	7.01614e-06	69.327	2	GEDPPPDIFAAADSK(1)K	0.15443	30885	34180	0.948269	1.05185	cytoplasm	K11653	ARID1; AT-rich interactive domain-containing protein 1	hsa05225 Hepatocellular carcinoma; hsa04714 Thermogenesis	GO:0000003 reproduction; GO:0000122 negative regulation of transcription by RNA polymerase II; GO:0001568 blood vessel development; GO:0001654 eye development; GO:0001704 formation of primary germ layer; GO:0001838 embryonic epithelial tube formation; GO:0001841 neural tube formation; GO:0001843 neural tube closure; GO:0001890 placenta development; GO:0001944 vasculature development; GO:0002009 m…	GO:0000228 nuclear chromosome; GO:0000785 chromatin; GO:0005622 intracellular anatomical structure; GO:0005634 nucleus; GO:0005654 nucleoplasm; GO:0005694 chromosome; GO:0005737 cytoplasm; GO:0005829 cytosol; GO:0005886 plasma membrane; GO:0016020 membrane; GO:0016514 SWI/SNF complex; GO:0031974 membrane-enclosed lumen; GO:0031981 nuclear lumen; GO:0032991 protein-containing complex; GO:0035060 b…	GO:0000981 DNA-binding transcription factor activity, RNA polymerase II-specific; GO:0003676 nucleic acid binding; GO:0003677 DNA binding; GO:0003700 DNA-binding transcription factor activity; GO:0003712 transcription coregulator activity; GO:0003713 transcription coactivator activity; GO:0005102 signaling receptor binding; GO:0005488 binding; GO:0005515 protein binding; GO:0008134 transcription …	PF01388	PF01388 ARID/BRIGHT DNA binding domain	B	KOG2510	SWI-SNF chromatin-remodeling complex protein	WP3651 PATHWAYS AFFECTED IN ADENOID CYSTIC CARCINOMA;WP4321 THERMOGENESIS;WP4204 TUMOR SUPPRESSOR ACTIVITY OF SMARCB1	http://www.wikipathways.org/instance/WP3651_r116547;http://www.wikipathways.org/instance/WP4321_r106178;http://www.wikipathways.org/instance/WP4204_r108297	Transcription factor	R-HSA-212436 Generic Transcription Pathway;R-HSA-3214858 RMTs methylate histone arginines;R-HSA-3247509 Chromatin modifying enzymes;R-HSA-4839726 Chromatin organization;R-HSA-73857 RNA Polymerase II Transcription;R-HSA-74160 Gene expression (Transcription);R-HSA-8878171 Transcriptional regulation by RUNX1;R-HSA-8939243 RUNX1 interacts with co-factors whose precise effect on RUNX1 targets is not k…	https://reactome.org/PathwayBrowser/#/R-HSA-212436;https://reactome.org/PathwayBrowser/#/R-HSA-3214858;https://reactome.org/PathwayBrowser/#/R-HSA-3247509;https://reactome.org/PathwayBrowser/#/R-HSA-4839726;https://reactome.org/PathwayBrowser/#/R-HSA-73857;https://reactome.org/PathwayBrowser/#/R-HSA-74160;https://reactome.org/PathwayBrowser/#/R-HSA-8878171;https://reactome.org/PathwayBrowser/#/R-…
O14497	980	K		None	AT-rich interactive domain-containing protein 1A OS=Homo sapiens OX=9606 GN=ARID1A PE=1 SV=3	ARID1A	1	0.023522	49.16	2	LTPATK(1)MNNK	14.643	88187	0	0.998853		cytoplasm	K11653	ARID1; AT-rich interactive domain-containing protein 1	hsa05225 Hepatocellular carcinoma; hsa04714 Thermogenesis	GO:0000003 reproduction; GO:0000122 negative regulation of transcription by RNA polymerase II; GO:0001568 blood vessel development; GO:0001654 eye development; GO:0001704 formation of primary germ layer; GO:0001838 embryonic epithelial tube formation; GO:0001841 neural tube formation; GO:0001843 neural tube closure; GO:0001890 placenta development; GO:0001944 vasculature development; GO:0002009 m…	GO:0000228 nuclear chromosome; GO:0000785 chromatin; GO:0005622 intracellular anatomical structure; GO:0005634 nucleus; GO:0005654 nucleoplasm; GO:0005694 chromosome; GO:0005737 cytoplasm; GO:0005829 cytosol; GO:0005886 plasma membrane; GO:0016020 membrane; GO:0016514 SWI/SNF complex; GO:0031974 membrane-enclosed lumen; GO:0031981 nuclear lumen; GO:0032991 protein-containing complex; GO:0035060 b…	GO:0000981 DNA-binding transcription factor activity, RNA polymerase II-specific; GO:0003676 nucleic acid binding; GO:0003677 DNA binding; GO:0003700 DNA-binding transcription factor activity; GO:0003712 transcription coregulator activity; GO:0003713 transcription coactivator activity; GO:0005102 signaling receptor binding; GO:0005488 binding; GO:0005515 protein binding; GO:0008134 transcription …	PF01388	PF01388 ARID/BRIGHT DNA binding domain	B	KOG2510	SWI-SNF chromatin-remodeling complex protein	WP3651 PATHWAYS AFFECTED IN ADENOID CYSTIC CARCINOMA;WP4321 THERMOGENESIS;WP4204 TUMOR SUPPRESSOR ACTIVITY OF SMARCB1	http://www.wikipathways.org/instance/WP3651_r116547;http://www.wikipathways.org/instance/WP4321_r106178;http://www.wikipathways.org/instance/WP4204_r108297	Transcription factor	R-HSA-212436 Generic Transcription Pathway;R-HSA-3214858 RMTs methylate histone arginines;R-HSA-3247509 Chromatin modifying enzymes;R-HSA-4839726 Chromatin organization;R-HSA-73857 RNA Polymerase II Transcription;R-HSA-74160 Gene expression (Transcription);R-HSA-8878171 Transcriptional regulation by RUNX1;R-HSA-8939243 RUNX1 interacts with co-factors whose precise effect on RUNX1 targets is not k…	https://reactome.org/PathwayBrowser/#/R-HSA-212436;https://reactome.org/PathwayBrowser/#/R-HSA-3214858;https://reactome.org/PathwayBrowser/#/R-HSA-3247509;https://reactome.org/PathwayBrowser/#/R-HSA-4839726;https://reactome.org/PathwayBrowser/#/R-HSA-73857;https://reactome.org/PathwayBrowser/#/R-HSA-74160;https://reactome.org/PathwayBrowser/#/R-HSA-8878171;https://reactome.org/PathwayBrowser/#/R-…
O14497	1615	K	3.33511	Up	AT-rich interactive domain-containing protein 1A OS=Homo sapiens OX=9606 GN=ARID1A PE=1 SV=3	ARID1A	1	3.09339e-08	76.049	3	MQK(1)AGPPVPASHIAPAPVQPPMIR	-1.4429	68647	228420	0.461635	1.5396	cytoplasm	K11653	ARID1; AT-rich interactive domain-containing protein 1	hsa05225 Hepatocellular carcinoma; hsa04714 Thermogenesis	GO:0000003 reproduction; GO:0000122 negative regulation of transcription by RNA polymerase II; GO:0001568 blood vessel development; GO:0001654 eye development; GO:0001704 formation of primary germ layer; GO:0001838 embryonic epithelial tube formation; GO:0001841 neural tube formation; GO:0001843 neural tube closure; GO:0001890 placenta development; GO:0001944 vasculature development; GO:0002009 m…	GO:0000228 nuclear chromosome; GO:0000785 chromatin; GO:0005622 intracellular anatomical structure; GO:0005634 nucleus; GO:0005654 nucleoplasm; GO:0005694 chromosome; GO:0005737 cytoplasm; GO:0005829 cytosol; GO:0005886 plasma membrane; GO:0016020 membrane; GO:0016514 SWI/SNF complex; GO:0031974 membrane-enclosed lumen; GO:0031981 nuclear lumen; GO:0032991 protein-containing complex; GO:0035060 b…	GO:0000981 DNA-binding transcription factor activity, RNA polymerase II-specific; GO:0003676 nucleic acid binding; GO:0003677 DNA binding; GO:0003700 DNA-binding transcription factor activity; GO:0003712 transcription coregulator activity; GO:0003713 transcription coactivator activity; GO:0005102 signaling receptor binding; GO:0005488 binding; GO:0005515 protein binding; GO:0008134 transcription …	PF01388	PF01388 ARID/BRIGHT DNA binding domain	B	KOG2510	SWI-SNF chromatin-remodeling complex protein	WP3651 PATHWAYS AFFECTED IN ADENOID CYSTIC CARCINOMA;WP4321 THERMOGENESIS;WP4204 TUMOR SUPPRESSOR ACTIVITY OF SMARCB1	http://www.wikipathways.org/instance/WP3651_r116547;http://www.wikipathways.org/instance/WP4321_r106178;http://www.wikipathways.org/instance/WP4204_r108297	Transcription factor	R-HSA-212436 Generic Transcription Pathway;R-HSA-3214858 RMTs methylate histone arginines;R-HSA-3247509 Chromatin modifying enzymes;R-HSA-4839726 Chromatin organization;R-HSA-73857 RNA Polymerase II Transcription;R-HSA-74160 Gene expression (Transcription);R-HSA-8878171 Transcriptional regulation by RUNX1;R-HSA-8939243 RUNX1 interacts with co-factors whose precise effect on RUNX1 targets is not k…	https://reactome.org/PathwayBrowser/#/R-HSA-212436;https://reactome.org/PathwayBrowser/#/R-HSA-3214858;https://reactome.org/PathwayBrowser/#/R-HSA-3247509;https://reactome.org/PathwayBrowser/#/R-HSA-4839726;https://reactome.org/PathwayBrowser/#/R-HSA-73857;https://reactome.org/PathwayBrowser/#/R-HSA-74160;https://reactome.org/PathwayBrowser/#/R-HSA-8878171;https://reactome.org/PathwayBrowser/#/R-…
O14497	1230	K		None	AT-rich interactive domain-containing protein 1A OS=Homo sapiens OX=9606 GN=ARID1A PE=1 SV=3	ARID1A	1	5.24466e-05	58.313	2	MSYEPNK(1)DPYGSMR	-0.3301	0	7423.6		1.00115	cytoplasm	K11653	ARID1; AT-rich interactive domain-containing protein 1	hsa05225 Hepatocellular carcinoma; hsa04714 Thermogenesis	GO:0000003 reproduction; GO:0000122 negative regulation of transcription by RNA polymerase II; GO:0001568 blood vessel development; GO:0001654 eye development; GO:0001704 formation of primary germ layer; GO:0001838 embryonic epithelial tube formation; GO:0001841 neural tube formation; GO:0001843 neural tube closure; GO:0001890 placenta development; GO:0001944 vasculature development; GO:0002009 m…	GO:0000228 nuclear chromosome; GO:0000785 chromatin; GO:0005622 intracellular anatomical structure; GO:0005634 nucleus; GO:0005654 nucleoplasm; GO:0005694 chromosome; GO:0005737 cytoplasm; GO:0005829 cytosol; GO:0005886 plasma membrane; GO:0016020 membrane; GO:0016514 SWI/SNF complex; GO:0031974 membrane-enclosed lumen; GO:0031981 nuclear lumen; GO:0032991 protein-containing complex; GO:0035060 b…	GO:0000981 DNA-binding transcription factor activity, RNA polymerase II-specific; GO:0003676 nucleic acid binding; GO:0003677 DNA binding; GO:0003700 DNA-binding transcription factor activity; GO:0003712 transcription coregulator activity; GO:0003713 transcription coactivator activity; GO:0005102 signaling receptor binding; GO:0005488 binding; GO:0005515 protein binding; GO:0008134 transcription …	PF01388	PF01388 ARID/BRIGHT DNA binding domain	B	KOG2510	SWI-SNF chromatin-remodeling complex protein	WP3651 PATHWAYS AFFECTED IN ADENOID CYSTIC CARCINOMA;WP4321 THERMOGENESIS;WP4204 TUMOR SUPPRESSOR ACTIVITY OF SMARCB1	http://www.wikipathways.org/instance/WP3651_r116547;http://www.wikipathways.org/instance/WP4321_r106178;http://www.wikipathways.org/instance/WP4204_r108297	Transcription factor	R-HSA-212436 Generic Transcription Pathway;R-HSA-3214858 RMTs methylate histone arginines;R-HSA-3247509 Chromatin modifying enzymes;R-HSA-4839726 Chromatin organization;R-HSA-73857 RNA Polymerase II Transcription;R-HSA-74160 Gene expression (Transcription);R-HSA-8878171 Transcriptional regulation by RUNX1;R-HSA-8939243 RUNX1 interacts with co-factors whose precise effect on RUNX1 targets is not k…	https://reactome.org/PathwayBrowser/#/R-HSA-212436;https://reactome.org/PathwayBrowser/#/R-HSA-3214858;https://reactome.org/PathwayBrowser/#/R-HSA-3247509;https://reactome.org/PathwayBrowser/#/R-HSA-4839726;https://reactome.org/PathwayBrowser/#/R-HSA-73857;https://reactome.org/PathwayBrowser/#/R-HSA-74160;https://reactome.org/PathwayBrowser/#/R-HSA-8878171;https://reactome.org/PathwayBrowser/#/R-…
O14497	1612	K	1.2162	None	AT-rich interactive domain-containing protein 1A OS=Homo sapiens OX=9606 GN=ARID1A PE=1 SV=3	ARID1A	1	6.69531e-05	74.849	2	SPFLHSGMK(1)MQK	-1.2307	36432	44207	0.902546	1.09768	cytoplasm	K11653	ARID1; AT-rich interactive domain-containing protein 1	hsa05225 Hepatocellular carcinoma; hsa04714 Thermogenesis	GO:0000003 reproduction; GO:0000122 negative regulation of transcription by RNA polymerase II; GO:0001568 blood vessel development; GO:0001654 eye development; GO:0001704 formation of primary germ layer; GO:0001838 embryonic epithelial tube formation; GO:0001841 neural tube formation; GO:0001843 neural tube closure; GO:0001890 placenta development; GO:0001944 vasculature development; GO:0002009 m…	GO:0000228 nuclear chromosome; GO:0000785 chromatin; GO:0005622 intracellular anatomical structure; GO:0005634 nucleus; GO:0005654 nucleoplasm; GO:0005694 chromosome; GO:0005737 cytoplasm; GO:0005829 cytosol; GO:0005886 plasma membrane; GO:0016020 membrane; GO:0016514 SWI/SNF complex; GO:0031974 membrane-enclosed lumen; GO:0031981 nuclear lumen; GO:0032991 protein-containing complex; GO:0035060 b…	GO:0000981 DNA-binding transcription factor activity, RNA polymerase II-specific; GO:0003676 nucleic acid binding; GO:0003677 DNA binding; GO:0003700 DNA-binding transcription factor activity; GO:0003712 transcription coregulator activity; GO:0003713 transcription coactivator activity; GO:0005102 signaling receptor binding; GO:0005488 binding; GO:0005515 protein binding; GO:0008134 transcription …	PF01388	PF01388 ARID/BRIGHT DNA binding domain	B	KOG2510	SWI-SNF chromatin-remodeling complex protein	WP3651 PATHWAYS AFFECTED IN ADENOID CYSTIC CARCINOMA;WP4321 THERMOGENESIS;WP4204 TUMOR SUPPRESSOR ACTIVITY OF SMARCB1	http://www.wikipathways.org/instance/WP3651_r116547;http://www.wikipathways.org/instance/WP4321_r106178;http://www.wikipathways.org/instance/WP4204_r108297	Transcription factor	R-HSA-212436 Generic Transcription Pathway;R-HSA-3214858 RMTs methylate histone arginines;R-HSA-3247509 Chromatin modifying enzymes;R-HSA-4839726 Chromatin organization;R-HSA-73857 RNA Polymerase II Transcription;R-HSA-74160 Gene expression (Transcription);R-HSA-8878171 Transcriptional regulation by RUNX1;R-HSA-8939243 RUNX1 interacts with co-factors whose precise effect on RUNX1 targets is not k…	https://reactome.org/PathwayBrowser/#/R-HSA-212436;https://reactome.org/PathwayBrowser/#/R-HSA-3214858;https://reactome.org/PathwayBrowser/#/R-HSA-3247509;https://reactome.org/PathwayBrowser/#/R-HSA-4839726;https://reactome.org/PathwayBrowser/#/R-HSA-73857;https://reactome.org/PathwayBrowser/#/R-HSA-74160;https://reactome.org/PathwayBrowser/#/R-HSA-8878171;https://reactome.org/PathwayBrowser/#/R-…
O14530	208	K	1.05248	None	Thioredoxin domain-containing protein 9 OS=Homo sapiens OX=9606 GN=TXNDC9 PE=1 SV=2	TXNDC9	1	8.79486e-05	94.804	2	FGTNFTK(1)LEK	0.12021	107550	136690	0.972095	1.02311	cytoplasm				GO:0000226 microtubule cytoskeleton organization; GO:0006139 nucleobase-containing compound metabolic process; GO:0006725 cellular aromatic compound metabolic process; GO:0006807 nitrogen compound metabolic process; GO:0006996 organelle organization; GO:0007010 cytoskeleton organization; GO:0007017 microtubule-based process; GO:0008152 metabolic process; GO:0008616 queuosine biosynthetic process;…	GO:0005622 intracellular anatomical structure; GO:0005634 nucleus; GO:0005737 cytoplasm; GO:0005813 centrosome; GO:0005815 microtubule organizing center; GO:0005829 cytosol; GO:0005856 cytoskeleton; GO:0015630 microtubule cytoskeleton; GO:0030496 midbody; GO:0043226 organelle; GO:0043227 membrane-bounded organelle; GO:0043228 non-membrane-bounded organelle; GO:0043229 intracellular organelle; GO:…		PF00085	PF00085 Thioredoxin	OC	KOG1672	ATP binding protein
O14530	201	K	1.76596	Up	Thioredoxin domain-containing protein 9 OS=Homo sapiens OX=9606 GN=TXNDC9 PE=1 SV=2	TXNDC9	1	0.00551584	69.905	2	K(1)FGTNFTK	1.0574	16231	34613	0.704726	1.24452	cytoplasm				GO:0000226 microtubule cytoskeleton organization; GO:0006139 nucleobase-containing compound metabolic process; GO:0006725 cellular aromatic compound metabolic process; GO:0006807 nitrogen compound metabolic process; GO:0006996 organelle organization; GO:0007010 cytoskeleton organization; GO:0007017 microtubule-based process; GO:0008152 metabolic process; GO:0008616 queuosine biosynthetic process;…	GO:0005622 intracellular anatomical structure; GO:0005634 nucleus; GO:0005737 cytoplasm; GO:0005813 centrosome; GO:0005815 microtubule organizing center; GO:0005829 cytosol; GO:0005856 cytoskeleton; GO:0015630 microtubule cytoskeleton; GO:0030496 midbody; GO:0043226 organelle; GO:0043227 membrane-bounded organelle; GO:0043228 non-membrane-bounded organelle; GO:0043229 intracellular organelle; GO:…		PF00085	PF00085 Thioredoxin	OC	KOG1672	ATP binding protein
O14562	130	K		None	Ubiquitin domain-containing protein UBFD1 OS=Homo sapiens OX=9606 GN=UBFD1 PE=1 SV=2	UBFD1	1	0.00659883	54.584	2	VMYK(1)GLVPEDK	-0.23182	0	22974		0.945783	cytoplasm							PF00240	PF00240 Ubiquitin family	O	KOG1872	Ubiquitin-specific protease
O14578	1935	K		None	Citron Rho-interacting kinase OS=Homo sapiens OX=9606 GN=CIT PE=1 SV=2	CIT	1	0.024209	47.361	2	GPPTYNEHITK(1)R	1.2743	13658	0	1.13774		nucleus	K16308			GO:0000003 reproduction; GO:0000070 mitotic sister chromatid segregation; GO:0000086 G2/M transition of mitotic cell cycle; GO:0000278 mitotic cell cycle; GO:0000280 nuclear division; GO:0000281 mitotic cytokinesis; GO:0000819 sister chromatid segregation; GO:0000910 cytokinesis; GO:0000912 assembly of actomyosin apparatus involved in cytokinesis; GO:0000915 actomyosin contractile ring assembly; …	GO:0001726 ruffle; GO:0005622 intracellular anatomical structure; GO:0005737 cytoplasm; GO:0005773 vacuole; GO:0005794 Golgi apparatus; GO:0005795 Golgi stack; GO:0005826 actomyosin contractile ring; GO:0005829 cytosol; GO:0005856 cytoskeleton; GO:0005886 plasma membrane; GO:0005938 cell cortex; GO:0012505 endomembrane system; GO:0015629 actin cytoskeleton; GO:0016020 membrane; GO:0030496 midbody…	GO:0003824 catalytic activity; GO:0004672 protein kinase activity; GO:0004674 protein serine/threonine kinase activity; GO:0005488 binding; GO:0005515 protein binding; GO:0016301 kinase activity; GO:0016740 transferase activity; GO:0016772 transferase activity, transferring phosphorus-containing groups; GO:0016773 phosphotransferase activity, alcohol group as acceptor; GO:0019899 enzyme binding; …	PF00069; PF00169	PF00069 Protein kinase domain; PF00169 PH domain	T	KOG0976	Rho/Rac1-interacting serine/threonine kinase Citron	WP524 G13 SIGNALING PATHWAY;WP5087 MALIGNANT PLEURAL MESOTHELIOMA	http://www.wikipathways.org/instance/WP524_r117113;http://www.wikipathways.org/instance/WP5087_r120373		R-HSA-162582 Signal Transduction;R-HSA-194315 Signaling by Rho GTPases;R-HSA-195258 RHO GTPase Effectors;R-HSA-5625900 RHO GTPases activate CIT;R-HSA-8980692 RHOA GTPase cycle;R-HSA-9012999 RHO GTPase cycle;R-HSA-9013026 RHOB GTPase cycle;R-HSA-9013106 RHOC GTPase cycle;R-HSA-9013149 RAC1 GTPase cycle;R-HSA-9716542 Signaling by Rho GTPases, Miro GTPases and RHOBTB3	https://reactome.org/PathwayBrowser/#/R-HSA-162582;https://reactome.org/PathwayBrowser/#/R-HSA-194315;https://reactome.org/PathwayBrowser/#/R-HSA-195258;https://reactome.org/PathwayBrowser/#/R-HSA-5625900;https://reactome.org/PathwayBrowser/#/R-HSA-8980692;https://reactome.org/PathwayBrowser/#/R-HSA-9012999;https://reactome.org/PathwayBrowser/#/R-HSA-9013026;https://reactome.org/PathwayBrowser/#/…	E2F TARGETS	https://www.gsea-msigdb.org/gsea/msigdb/cards/HALLMARK_E2F_TARGETS
O14578	1297	K		None	Citron Rho-interacting kinase OS=Homo sapiens OX=9606 GN=CIT PE=1 SV=2	CIT	1	0.00136206	41.87	3	K(1)ATDHPHPSTPATAR	0.02674	0	9528		0.892009	nucleus	K16308			GO:0000003 reproduction; GO:0000070 mitotic sister chromatid segregation; GO:0000086 G2/M transition of mitotic cell cycle; GO:0000278 mitotic cell cycle; GO:0000280 nuclear division; GO:0000281 mitotic cytokinesis; GO:0000819 sister chromatid segregation; GO:0000910 cytokinesis; GO:0000912 assembly of actomyosin apparatus involved in cytokinesis; GO:0000915 actomyosin contractile ring assembly; …	GO:0001726 ruffle; GO:0005622 intracellular anatomical structure; GO:0005737 cytoplasm; GO:0005773 vacuole; GO:0005794 Golgi apparatus; GO:0005795 Golgi stack; GO:0005826 actomyosin contractile ring; GO:0005829 cytosol; GO:0005856 cytoskeleton; GO:0005886 plasma membrane; GO:0005938 cell cortex; GO:0012505 endomembrane system; GO:0015629 actin cytoskeleton; GO:0016020 membrane; GO:0030496 midbody…	GO:0003824 catalytic activity; GO:0004672 protein kinase activity; GO:0004674 protein serine/threonine kinase activity; GO:0005488 binding; GO:0005515 protein binding; GO:0016301 kinase activity; GO:0016740 transferase activity; GO:0016772 transferase activity, transferring phosphorus-containing groups; GO:0016773 phosphotransferase activity, alcohol group as acceptor; GO:0019899 enzyme binding; …	PF00069; PF00169	PF00069 Protein kinase domain; PF00169 PH domain	T	KOG0976	Rho/Rac1-interacting serine/threonine kinase Citron	WP524 G13 SIGNALING PATHWAY;WP5087 MALIGNANT PLEURAL MESOTHELIOMA	http://www.wikipathways.org/instance/WP524_r117113;http://www.wikipathways.org/instance/WP5087_r120373		R-HSA-162582 Signal Transduction;R-HSA-194315 Signaling by Rho GTPases;R-HSA-195258 RHO GTPase Effectors;R-HSA-5625900 RHO GTPases activate CIT;R-HSA-8980692 RHOA GTPase cycle;R-HSA-9012999 RHO GTPase cycle;R-HSA-9013026 RHOB GTPase cycle;R-HSA-9013106 RHOC GTPase cycle;R-HSA-9013149 RAC1 GTPase cycle;R-HSA-9716542 Signaling by Rho GTPases, Miro GTPases and RHOBTB3	https://reactome.org/PathwayBrowser/#/R-HSA-162582;https://reactome.org/PathwayBrowser/#/R-HSA-194315;https://reactome.org/PathwayBrowser/#/R-HSA-195258;https://reactome.org/PathwayBrowser/#/R-HSA-5625900;https://reactome.org/PathwayBrowser/#/R-HSA-8980692;https://reactome.org/PathwayBrowser/#/R-HSA-9012999;https://reactome.org/PathwayBrowser/#/R-HSA-9013026;https://reactome.org/PathwayBrowser/#/…	E2F TARGETS	https://www.gsea-msigdb.org/gsea/msigdb/cards/HALLMARK_E2F_TARGETS
P47813	68	K		None	Eukaryotic translation initiation factor 1A, X-chromosomal OS=Homo sapiens OX=9606 GN=EIF1AX PE=1 SV=2	EIF1AX	1	1.0771e-06	101.64	2	K(1)VWINTSDIILVGLR	1.2401	31164	4994.8			cytoplasm,nucleus	K03236			GO:0006412 translation; GO:0006413 translational initiation; GO:0006518 peptide metabolic process; GO:0006807 nitrogen compound metabolic process; GO:0008152 metabolic process; GO:0009058 biosynthetic process; GO:0009059 macromolecule biosynthetic process; GO:0009987 cellular process; GO:0010467 gene expression; GO:0019538 protein metabolic process; GO:0034641 cellular nitrogen compound metabolic…	GO:0005622 intracellular anatomical structure; GO:0005737 cytoplasm; GO:0005829 cytosol;	GO:0003676 nucleic acid binding; GO:0003723 RNA binding; GO:0005488 binding; GO:0008135 translation factor activity, RNA binding; GO:0097159 organic cyclic compound binding; GO:1901363 heterocyclic compound binding;	PF01176	PF01176 Translation initiation factor 1A / IF-1	J	KOG3403	Translation initiation factor 1A (eIF-1A)	WP5027 NSP1 FROM SARSCOV2 INHIBITS TRANSLATION INITIATION IN THE HOST CELL;WP107 TRANSLATION FACTORS	http://www.wikipathways.org/instance/WP5027_r120060;http://www.wikipathways.org/instance/WP107_r117851		R-HSA-156827 L13a-mediated translational silencing of Ceruloplasmin expression;R-HSA-392499 Metabolism of proteins;R-HSA-72613 Eukaryotic Translation Initiation;R-HSA-72649 Translation initiation complex formation;R-HSA-72662 Activation of the mRNA upon binding of the cap-binding complex and eIFs, and subsequent binding to 43S;R-HSA-72689 Formation of a pool of free 40S subunits;R-HSA-72695 Forma…	https://reactome.org/PathwayBrowser/#/R-HSA-156827;https://reactome.org/PathwayBrowser/#/R-HSA-392499;https://reactome.org/PathwayBrowser/#/R-HSA-72613;https://reactome.org/PathwayBrowser/#/R-HSA-72649;https://reactome.org/PathwayBrowser/#/R-HSA-72662;https://reactome.org/PathwayBrowser/#/R-HSA-72689;https://reactome.org/PathwayBrowser/#/R-HSA-72695;https://reactome.org/PathwayBrowser/#/R-HSA-727…	MYC TARGETS V1	https://www.gsea-msigdb.org/gsea/msigdb/cards/HALLMARK_MYC_TARGETS_V1
O14617	165	K		None	AP-3 complex subunit delta-1 OS=Homo sapiens OX=9606 GN=AP3D1 PE=1 SV=1	AP3D1	1	0.0113485	51.456	2	K(1)AVLIMYK	-7.8581	49655	0	1.00191		cytoplasm	K12396	AP3D; AP-3 complex subunit delta	hsa04142 Lysosome	GO:0000041 transition metal ion transport; GO:0002376 immune system process; GO:0002475 antigen processing and presentation via MHC class Ib; GO:0002682 regulation of immune system process; GO:0002684 positive regulation of immune system process; GO:0002694 regulation of leukocyte activation; GO:0002696 positive regulation of leukocyte activation; GO:0006725 cellular aromatic compound metabolic p…	GO:0005622 intracellular anatomical structure; GO:0005737 cytoplasm; GO:0005768 endosome; GO:0005770 late endosome; GO:0005783 endoplasmic reticulum; GO:0005794 Golgi apparatus; GO:0005795 Golgi stack; GO:0005798 Golgi-associated vesicle; GO:0005802 trans-Golgi network; GO:0010008 endosome membrane; GO:0012505 endomembrane system; GO:0016020 membrane; GO:0030117 membrane coat; GO:0030119 AP-type …	GO:0005215 transporter activity;			U	KOG1059	Vesicle coat complex AP-3, delta subunit
O14617	654	K	1.93688	Up	AP-3 complex subunit delta-1 OS=Homo sapiens OX=9606 GN=AP3D1 PE=1 SV=1	AP3D1	1	0.000593031	78.864	4	RPK(1)HRPSEADEEELAR	0.14298	8975.6	17451	0.680582	1.3182	cytoplasm	K12396	AP3D; AP-3 complex subunit delta	hsa04142 Lysosome	GO:0000041 transition metal ion transport; GO:0002376 immune system process; GO:0002475 antigen processing and presentation via MHC class Ib; GO:0002682 regulation of immune system process; GO:0002684 positive regulation of immune system process; GO:0002694 regulation of leukocyte activation; GO:0002696 positive regulation of leukocyte activation; GO:0006725 cellular aromatic compound metabolic p…	GO:0005622 intracellular anatomical structure; GO:0005737 cytoplasm; GO:0005768 endosome; GO:0005770 late endosome; GO:0005783 endoplasmic reticulum; GO:0005794 Golgi apparatus; GO:0005795 Golgi stack; GO:0005798 Golgi-associated vesicle; GO:0005802 trans-Golgi network; GO:0010008 endosome membrane; GO:0012505 endomembrane system; GO:0016020 membrane; GO:0030117 membrane coat; GO:0030119 AP-type …	GO:0005215 transporter activity;			U	KOG1059	Vesicle coat complex AP-3, delta subunit
O14646	1592	K		None	Chromodomain-helicase-DNA-binding protein 1 OS=Homo sapiens OX=9606 GN=CHD1 PE=1 SV=2	CHD1	1	0.00293102	48.785	2	DWDHYK(1)QDSR	-0.06524	0	17959		0.948433	nucleus	K11367			GO:0000003 reproduction; GO:0002009 morphogenesis of an epithelium; GO:0002165 instar larval or pupal development; GO:0003006 developmental process involved in reproduction; GO:0006139 nucleobase-containing compound metabolic process; GO:0006325 chromatin organization; GO:0006333 chromatin assembly or disassembly; GO:0006338 chromatin remodeling; GO:0006355 regulation of transcription, DNA-templa…	GO:0001650 fibrillar center; GO:0005622 intracellular anatomical structure; GO:0005634 nucleus; GO:0005654 nucleoplasm; GO:0005694 chromosome; GO:0005700 polytene chromosome; GO:0005703 polytene chromosome puff; GO:0005705 polytene chromosome interband; GO:0005730 nucleolus; GO:0005737 cytoplasm; GO:0030684 preribosome; GO:0030688 preribosome, small subunit precursor; GO:0031974 membrane-enclosed…	GO:0000976 transcription cis-regulatory region binding; GO:0000977 RNA polymerase II transcription regulatory region sequence-specific DNA binding; GO:0000978 RNA polymerase II cis-regulatory region sequence-specific DNA binding; GO:0000987 cis-regulatory region sequence-specific DNA binding; GO:0001067 transcription regulatory region nucleic acid binding; GO:0003676 nucleic acid binding; GO:0003…	PF00385; PF00176; PF00271; PF18375; PF13907	PF00385 Chromo (CHRromatin Organisation MOdifier) domain; PF00176 SNF2-related domain; PF00271 Helicase conserved C-terminal domain; PF18375 CDH1/2 SANT-Helical linker 1; PF13907 Domain of unknown function (DUF4208)	K	KOG0384	Chromodomain-helicase DNA-binding protein	WP5144 NRP1TRIGGERED SIGNALING PATHWAYS IN PANCREATIC CANCER	http://www.wikipathways.org/instance/WP5144_r120537	Transcription factor	R-HSA-162582 Signal Transduction;R-HSA-8939211 ESR-mediated signaling;R-HSA-9006931 Signaling by Nuclear Receptors;R-HSA-9018519 Estrogen-dependent gene expression	https://reactome.org/PathwayBrowser/#/R-HSA-162582;https://reactome.org/PathwayBrowser/#/R-HSA-8939211;https://reactome.org/PathwayBrowser/#/R-HSA-9006931;https://reactome.org/PathwayBrowser/#/R-HSA-9018519
O14646	1330	K		None	Chromodomain-helicase-DNA-binding protein 1 OS=Homo sapiens OX=9606 GN=CHD1 PE=1 SV=2	CHD1	1	0.0386827	53.517	2	EALSGAGSSK(1)R	-0.51316	21117	0	1.0575		nucleus	K11367			GO:0000003 reproduction; GO:0002009 morphogenesis of an epithelium; GO:0002165 instar larval or pupal development; GO:0003006 developmental process involved in reproduction; GO:0006139 nucleobase-containing compound metabolic process; GO:0006325 chromatin organization; GO:0006333 chromatin assembly or disassembly; GO:0006338 chromatin remodeling; GO:0006355 regulation of transcription, DNA-templa…	GO:0001650 fibrillar center; GO:0005622 intracellular anatomical structure; GO:0005634 nucleus; GO:0005654 nucleoplasm; GO:0005694 chromosome; GO:0005700 polytene chromosome; GO:0005703 polytene chromosome puff; GO:0005705 polytene chromosome interband; GO:0005730 nucleolus; GO:0005737 cytoplasm; GO:0030684 preribosome; GO:0030688 preribosome, small subunit precursor; GO:0031974 membrane-enclosed…	GO:0000976 transcription cis-regulatory region binding; GO:0000977 RNA polymerase II transcription regulatory region sequence-specific DNA binding; GO:0000978 RNA polymerase II cis-regulatory region sequence-specific DNA binding; GO:0000987 cis-regulatory region sequence-specific DNA binding; GO:0001067 transcription regulatory region nucleic acid binding; GO:0003676 nucleic acid binding; GO:0003…	PF00385; PF00176; PF00271; PF18375; PF13907	PF00385 Chromo (CHRromatin Organisation MOdifier) domain; PF00176 SNF2-related domain; PF00271 Helicase conserved C-terminal domain; PF18375 CDH1/2 SANT-Helical linker 1; PF13907 Domain of unknown function (DUF4208)	K	KOG0384	Chromodomain-helicase DNA-binding protein	WP5144 NRP1TRIGGERED SIGNALING PATHWAYS IN PANCREATIC CANCER	http://www.wikipathways.org/instance/WP5144_r120537	Transcription factor	R-HSA-162582 Signal Transduction;R-HSA-8939211 ESR-mediated signaling;R-HSA-9006931 Signaling by Nuclear Receptors;R-HSA-9018519 Estrogen-dependent gene expression	https://reactome.org/PathwayBrowser/#/R-HSA-162582;https://reactome.org/PathwayBrowser/#/R-HSA-8939211;https://reactome.org/PathwayBrowser/#/R-HSA-9006931;https://reactome.org/PathwayBrowser/#/R-HSA-9018519
O14646	401	K	1.97262	Up	Chromodomain-helicase-DNA-binding protein 1 OS=Homo sapiens OX=9606 GN=CHD1 PE=1 SV=2	CHD1	1	0.000160887	61.23	3	IIAHSNQK(1)SAAGYPDYYCK	-0.10973	11912	26200	0.661047	1.304	nucleus	K11367			GO:0000003 reproduction; GO:0002009 morphogenesis of an epithelium; GO:0002165 instar larval or pupal development; GO:0003006 developmental process involved in reproduction; GO:0006139 nucleobase-containing compound metabolic process; GO:0006325 chromatin organization; GO:0006333 chromatin assembly or disassembly; GO:0006338 chromatin remodeling; GO:0006355 regulation of transcription, DNA-templa…	GO:0001650 fibrillar center; GO:0005622 intracellular anatomical structure; GO:0005634 nucleus; GO:0005654 nucleoplasm; GO:0005694 chromosome; GO:0005700 polytene chromosome; GO:0005703 polytene chromosome puff; GO:0005705 polytene chromosome interband; GO:0005730 nucleolus; GO:0005737 cytoplasm; GO:0030684 preribosome; GO:0030688 preribosome, small subunit precursor; GO:0031974 membrane-enclosed…	GO:0000976 transcription cis-regulatory region binding; GO:0000977 RNA polymerase II transcription regulatory region sequence-specific DNA binding; GO:0000978 RNA polymerase II cis-regulatory region sequence-specific DNA binding; GO:0000987 cis-regulatory region sequence-specific DNA binding; GO:0001067 transcription regulatory region nucleic acid binding; GO:0003676 nucleic acid binding; GO:0003…	PF00385; PF00176; PF00271; PF18375; PF13907	PF00385 Chromo (CHRromatin Organisation MOdifier) domain; PF00176 SNF2-related domain; PF00271 Helicase conserved C-terminal domain; PF18375 CDH1/2 SANT-Helical linker 1; PF13907 Domain of unknown function (DUF4208)	K	KOG0384	Chromodomain-helicase DNA-binding protein	WP5144 NRP1TRIGGERED SIGNALING PATHWAYS IN PANCREATIC CANCER	http://www.wikipathways.org/instance/WP5144_r120537	Transcription factor	R-HSA-162582 Signal Transduction;R-HSA-8939211 ESR-mediated signaling;R-HSA-9006931 Signaling by Nuclear Receptors;R-HSA-9018519 Estrogen-dependent gene expression	https://reactome.org/PathwayBrowser/#/R-HSA-162582;https://reactome.org/PathwayBrowser/#/R-HSA-8939211;https://reactome.org/PathwayBrowser/#/R-HSA-9006931;https://reactome.org/PathwayBrowser/#/R-HSA-9018519
O14646	1383	K		None	Chromodomain-helicase-DNA-binding protein 1 OS=Homo sapiens OX=9606 GN=CHD1 PE=1 SV=2	CHD1	1	2.35479e-18	74.053	3	K(1)SSVSDAPVHITASGEPVPISEESEELDQK	-1.1412	0	61911		0.948433	nucleus	K11367			GO:0000003 reproduction; GO:0002009 morphogenesis of an epithelium; GO:0002165 instar larval or pupal development; GO:0003006 developmental process involved in reproduction; GO:0006139 nucleobase-containing compound metabolic process; GO:0006325 chromatin organization; GO:0006333 chromatin assembly or disassembly; GO:0006338 chromatin remodeling; GO:0006355 regulation of transcription, DNA-templa…	GO:0001650 fibrillar center; GO:0005622 intracellular anatomical structure; GO:0005634 nucleus; GO:0005654 nucleoplasm; GO:0005694 chromosome; GO:0005700 polytene chromosome; GO:0005703 polytene chromosome puff; GO:0005705 polytene chromosome interband; GO:0005730 nucleolus; GO:0005737 cytoplasm; GO:0030684 preribosome; GO:0030688 preribosome, small subunit precursor; GO:0031974 membrane-enclosed…	GO:0000976 transcription cis-regulatory region binding; GO:0000977 RNA polymerase II transcription regulatory region sequence-specific DNA binding; GO:0000978 RNA polymerase II cis-regulatory region sequence-specific DNA binding; GO:0000987 cis-regulatory region sequence-specific DNA binding; GO:0001067 transcription regulatory region nucleic acid binding; GO:0003676 nucleic acid binding; GO:0003…	PF00385; PF00176; PF00271; PF18375; PF13907	PF00385 Chromo (CHRromatin Organisation MOdifier) domain; PF00176 SNF2-related domain; PF00271 Helicase conserved C-terminal domain; PF18375 CDH1/2 SANT-Helical linker 1; PF13907 Domain of unknown function (DUF4208)	K	KOG0384	Chromodomain-helicase DNA-binding protein	WP5144 NRP1TRIGGERED SIGNALING PATHWAYS IN PANCREATIC CANCER	http://www.wikipathways.org/instance/WP5144_r120537	Transcription factor	R-HSA-162582 Signal Transduction;R-HSA-8939211 ESR-mediated signaling;R-HSA-9006931 Signaling by Nuclear Receptors;R-HSA-9018519 Estrogen-dependent gene expression	https://reactome.org/PathwayBrowser/#/R-HSA-162582;https://reactome.org/PathwayBrowser/#/R-HSA-8939211;https://reactome.org/PathwayBrowser/#/R-HSA-9006931;https://reactome.org/PathwayBrowser/#/R-HSA-9018519
O14646	1624	K	1.15035	None	Chromodomain-helicase-DNA-binding protein 1 OS=Homo sapiens OX=9606 GN=CHD1 PE=1 SV=2	CHD1	1	0.004036	70.389	2	SNLEGSLK(1)DR	-1.2464	26235	33650	0.926557	1.06587	nucleus	K11367			GO:0000003 reproduction; GO:0002009 morphogenesis of an epithelium; GO:0002165 instar larval or pupal development; GO:0003006 developmental process involved in reproduction; GO:0006139 nucleobase-containing compound metabolic process; GO:0006325 chromatin organization; GO:0006333 chromatin assembly or disassembly; GO:0006338 chromatin remodeling; GO:0006355 regulation of transcription, DNA-templa…	GO:0001650 fibrillar center; GO:0005622 intracellular anatomical structure; GO:0005634 nucleus; GO:0005654 nucleoplasm; GO:0005694 chromosome; GO:0005700 polytene chromosome; GO:0005703 polytene chromosome puff; GO:0005705 polytene chromosome interband; GO:0005730 nucleolus; GO:0005737 cytoplasm; GO:0030684 preribosome; GO:0030688 preribosome, small subunit precursor; GO:0031974 membrane-enclosed…	GO:0000976 transcription cis-regulatory region binding; GO:0000977 RNA polymerase II transcription regulatory region sequence-specific DNA binding; GO:0000978 RNA polymerase II cis-regulatory region sequence-specific DNA binding; GO:0000987 cis-regulatory region sequence-specific DNA binding; GO:0001067 transcription regulatory region nucleic acid binding; GO:0003676 nucleic acid binding; GO:0003…	PF00385; PF00176; PF00271; PF18375; PF13907	PF00385 Chromo (CHRromatin Organisation MOdifier) domain; PF00176 SNF2-related domain; PF00271 Helicase conserved C-terminal domain; PF18375 CDH1/2 SANT-Helical linker 1; PF13907 Domain of unknown function (DUF4208)	K	KOG0384	Chromodomain-helicase DNA-binding protein	WP5144 NRP1TRIGGERED SIGNALING PATHWAYS IN PANCREATIC CANCER	http://www.wikipathways.org/instance/WP5144_r120537	Transcription factor	R-HSA-162582 Signal Transduction;R-HSA-8939211 ESR-mediated signaling;R-HSA-9006931 Signaling by Nuclear Receptors;R-HSA-9018519 Estrogen-dependent gene expression	https://reactome.org/PathwayBrowser/#/R-HSA-162582;https://reactome.org/PathwayBrowser/#/R-HSA-8939211;https://reactome.org/PathwayBrowser/#/R-HSA-9006931;https://reactome.org/PathwayBrowser/#/R-HSA-9018519
O14646	88	K	1.15303	None	Chromodomain-helicase-DNA-binding protein 1 OS=Homo sapiens OX=9606 GN=CHD1 PE=1 SV=2	CHD1	1	1.44185e-14	122.2	2	VDGAEFWK(1)SSPSILAVQR	-0.50201	92718	119200	0.925349	1.06695	nucleus	K11367			GO:0000003 reproduction; GO:0002009 morphogenesis of an epithelium; GO:0002165 instar larval or pupal development; GO:0003006 developmental process involved in reproduction; GO:0006139 nucleobase-containing compound metabolic process; GO:0006325 chromatin organization; GO:0006333 chromatin assembly or disassembly; GO:0006338 chromatin remodeling; GO:0006355 regulation of transcription, DNA-templa…	GO:0001650 fibrillar center; GO:0005622 intracellular anatomical structure; GO:0005634 nucleus; GO:0005654 nucleoplasm; GO:0005694 chromosome; GO:0005700 polytene chromosome; GO:0005703 polytene chromosome puff; GO:0005705 polytene chromosome interband; GO:0005730 nucleolus; GO:0005737 cytoplasm; GO:0030684 preribosome; GO:0030688 preribosome, small subunit precursor; GO:0031974 membrane-enclosed…	GO:0000976 transcription cis-regulatory region binding; GO:0000977 RNA polymerase II transcription regulatory region sequence-specific DNA binding; GO:0000978 RNA polymerase II cis-regulatory region sequence-specific DNA binding; GO:0000987 cis-regulatory region sequence-specific DNA binding; GO:0001067 transcription regulatory region nucleic acid binding; GO:0003676 nucleic acid binding; GO:0003…	PF00385; PF00176; PF00271; PF18375; PF13907	PF00385 Chromo (CHRromatin Organisation MOdifier) domain; PF00176 SNF2-related domain; PF00271 Helicase conserved C-terminal domain; PF18375 CDH1/2 SANT-Helical linker 1; PF13907 Domain of unknown function (DUF4208)	K	KOG0384	Chromodomain-helicase DNA-binding protein	WP5144 NRP1TRIGGERED SIGNALING PATHWAYS IN PANCREATIC CANCER	http://www.wikipathways.org/instance/WP5144_r120537	Transcription factor	R-HSA-162582 Signal Transduction;R-HSA-8939211 ESR-mediated signaling;R-HSA-9006931 Signaling by Nuclear Receptors;R-HSA-9018519 Estrogen-dependent gene expression	https://reactome.org/PathwayBrowser/#/R-HSA-162582;https://reactome.org/PathwayBrowser/#/R-HSA-8939211;https://reactome.org/PathwayBrowser/#/R-HSA-9006931;https://reactome.org/PathwayBrowser/#/R-HSA-9018519
O14646	80	K		None	Chromodomain-helicase-DNA-binding protein 1 OS=Homo sapiens OX=9606 GN=CHD1 PE=1 SV=2	CHD1	0.998868	0.00231061	54.199	2	VQAK(0.001)PPK(0.999)VDGAEFWK	-0.0046151	0	17744		0.948433	nucleus	K11367			GO:0000003 reproduction; GO:0002009 morphogenesis of an epithelium; GO:0002165 instar larval or pupal development; GO:0003006 developmental process involved in reproduction; GO:0006139 nucleobase-containing compound metabolic process; GO:0006325 chromatin organization; GO:0006333 chromatin assembly or disassembly; GO:0006338 chromatin remodeling; GO:0006355 regulation of transcription, DNA-templa…	GO:0001650 fibrillar center; GO:0005622 intracellular anatomical structure; GO:0005634 nucleus; GO:0005654 nucleoplasm; GO:0005694 chromosome; GO:0005700 polytene chromosome; GO:0005703 polytene chromosome puff; GO:0005705 polytene chromosome interband; GO:0005730 nucleolus; GO:0005737 cytoplasm; GO:0030684 preribosome; GO:0030688 preribosome, small subunit precursor; GO:0031974 membrane-enclosed…	GO:0000976 transcription cis-regulatory region binding; GO:0000977 RNA polymerase II transcription regulatory region sequence-specific DNA binding; GO:0000978 RNA polymerase II cis-regulatory region sequence-specific DNA binding; GO:0000987 cis-regulatory region sequence-specific DNA binding; GO:0001067 transcription regulatory region nucleic acid binding; GO:0003676 nucleic acid binding; GO:0003…	PF00385; PF00176; PF00271; PF18375; PF13907	PF00385 Chromo (CHRromatin Organisation MOdifier) domain; PF00176 SNF2-related domain; PF00271 Helicase conserved C-terminal domain; PF18375 CDH1/2 SANT-Helical linker 1; PF13907 Domain of unknown function (DUF4208)	K	KOG0384	Chromodomain-helicase DNA-binding protein	WP5144 NRP1TRIGGERED SIGNALING PATHWAYS IN PANCREATIC CANCER	http://www.wikipathways.org/instance/WP5144_r120537	Transcription factor	R-HSA-162582 Signal Transduction;R-HSA-8939211 ESR-mediated signaling;R-HSA-9006931 Signaling by Nuclear Receptors;R-HSA-9018519 Estrogen-dependent gene expression	https://reactome.org/PathwayBrowser/#/R-HSA-162582;https://reactome.org/PathwayBrowser/#/R-HSA-8939211;https://reactome.org/PathwayBrowser/#/R-HSA-9006931;https://reactome.org/PathwayBrowser/#/R-HSA-9018519
O14647	1769	K	1.27944	None	Chromodomain-helicase-DNA-binding protein 2 OS=Homo sapiens OX=9606 GN=CHD2 PE=1 SV=2	CHD2	1	4.38842e-05	96.957	2	SFHTDK(1)LGEYK	0.086804	29178	30213	0.888894	1.13728	nucleus	K20091			GO:0000003 reproduction; GO:0002009 morphogenesis of an epithelium; GO:0002165 instar larval or pupal development; GO:0002244 hematopoietic progenitor cell differentiation; GO:0002376 immune system process; GO:0002520 immune system development; GO:0003006 developmental process involved in reproduction; GO:0006325 chromatin organization; GO:0006338 chromatin remodeling; GO:0006355 regulation of tr…	GO:0001650 fibrillar center; GO:0005622 intracellular anatomical structure; GO:0005634 nucleus; GO:0005654 nucleoplasm; GO:0005694 chromosome; GO:0005700 polytene chromosome; GO:0005703 polytene chromosome puff; GO:0005705 polytene chromosome interband; GO:0005730 nucleolus; GO:0005737 cytoplasm; GO:0031974 membrane-enclosed lumen; GO:0031981 nuclear lumen; GO:0043226 organelle; GO:0043227 membra…	GO:0000976 transcription cis-regulatory region binding; GO:0000977 RNA polymerase II transcription regulatory region sequence-specific DNA binding; GO:0000978 RNA polymerase II cis-regulatory region sequence-specific DNA binding; GO:0000987 cis-regulatory region sequence-specific DNA binding; GO:0001067 transcription regulatory region nucleic acid binding; GO:0003676 nucleic acid binding; GO:0003…	PF00385; PF00176; PF00271; PF18375; PF13907	PF00385 Chromo (CHRromatin Organisation MOdifier) domain; PF00176 SNF2-related domain; PF00271 Helicase conserved C-terminal domain; PF18375 CDH1/2 SANT-Helical linker 1; PF13907 Domain of unknown function (DUF4208)	K	KOG0384	Chromodomain-helicase DNA-binding protein	WP4673 MALE INFERTILITY;WP5144 NRP1TRIGGERED SIGNALING PATHWAYS IN PANCREATIC CANCER;WP3995 PRION DISEASE PATHWAY	http://www.wikipathways.org/instance/WP4673_r119920;http://www.wikipathways.org/instance/WP5144_r120537;http://www.wikipathways.org/instance/WP3995_r119304	Transcription factor
O14737	20	K		None	Programmed cell death protein 5 OS=Homo sapiens OX=9606 GN=PDCD5 PE=1 SV=3	PDCD5	1	8.95919e-05	52.773	3	LAELQAK(1)HGDPGDAAQQEAK	1.399	18902	0	0.977568		cytoplasm	K06875			GO:0006915 apoptotic process; GO:0008219 cell death; GO:0008285 negative regulation of cell population proliferation; GO:0009719 response to endogenous stimulus; GO:0009893 positive regulation of metabolic process; GO:0009966 regulation of signal transduction; GO:0009967 positive regulation of signal transduction; GO:0009987 cellular process; GO:0010033 response to organic substance; GO:0010468 r…	GO:0005622 intracellular anatomical structure; GO:0005634 nucleus; GO:0005737 cytoplasm; GO:0005829 cytosol; GO:0043226 organelle; GO:0043227 membrane-bounded organelle; GO:0043229 intracellular organelle; GO:0043231 intracellular membrane-bounded organelle;	GO:0005488 binding; GO:0005515 protein binding; GO:0005539 glycosaminoglycan binding; GO:0008047 enzyme activator activity; GO:0008092 cytoskeletal protein binding; GO:0008201 heparin binding; GO:0010698 acetyltransferase activator activity; GO:0015631 tubulin binding; GO:0030234 enzyme regulator activity; GO:0043167 ion binding; GO:0043168 anion binding; GO:0048487 beta-tubulin binding; GO:00973…			D	KOG3431	Apoptosis-related protein/predicted DNA-binding protein
O14737	66	K	0.998134	None	Programmed cell death protein 5 OS=Homo sapiens OX=9606 GN=PDCD5 PE=1 SV=3	PDCD5	0.981659	5.93487e-07	97.175	2	LSNLALVK(0.018)PEK(0.982)TK	-0.45705	10224	9747.1	1.00091	0.999045	cytoplasm	K06875			GO:0006915 apoptotic process; GO:0008219 cell death; GO:0008285 negative regulation of cell population proliferation; GO:0009719 response to endogenous stimulus; GO:0009893 positive regulation of metabolic process; GO:0009966 regulation of signal transduction; GO:0009967 positive regulation of signal transduction; GO:0009987 cellular process; GO:0010033 response to organic substance; GO:0010468 r…	GO:0005622 intracellular anatomical structure; GO:0005634 nucleus; GO:0005737 cytoplasm; GO:0005829 cytosol; GO:0043226 organelle; GO:0043227 membrane-bounded organelle; GO:0043229 intracellular organelle; GO:0043231 intracellular membrane-bounded organelle;	GO:0005488 binding; GO:0005515 protein binding; GO:0005539 glycosaminoglycan binding; GO:0008047 enzyme activator activity; GO:0008092 cytoskeletal protein binding; GO:0008201 heparin binding; GO:0010698 acetyltransferase activator activity; GO:0015631 tubulin binding; GO:0030234 enzyme regulator activity; GO:0043167 ion binding; GO:0043168 anion binding; GO:0048487 beta-tubulin binding; GO:00973…			D	KOG3431	Apoptosis-related protein/predicted DNA-binding protein
O14737	110	K	1.34772	None	Programmed cell death protein 5 OS=Homo sapiens OX=9606 GN=PDCD5 PE=1 SV=3	PDCD5	1	5.02813e-09	161.12	2	TTTVK(1)FNR	0.70961	906580	1167000	0.854796	1.15202	cytoplasm	K06875			GO:0006915 apoptotic process; GO:0008219 cell death; GO:0008285 negative regulation of cell population proliferation; GO:0009719 response to endogenous stimulus; GO:0009893 positive regulation of metabolic process; GO:0009966 regulation of signal transduction; GO:0009967 positive regulation of signal transduction; GO:0009987 cellular process; GO:0010033 response to organic substance; GO:0010468 r…	GO:0005622 intracellular anatomical structure; GO:0005634 nucleus; GO:0005737 cytoplasm; GO:0005829 cytosol; GO:0043226 organelle; GO:0043227 membrane-bounded organelle; GO:0043229 intracellular organelle; GO:0043231 intracellular membrane-bounded organelle;	GO:0005488 binding; GO:0005515 protein binding; GO:0005539 glycosaminoglycan binding; GO:0008047 enzyme activator activity; GO:0008092 cytoskeletal protein binding; GO:0008201 heparin binding; GO:0010698 acetyltransferase activator activity; GO:0015631 tubulin binding; GO:0030234 enzyme regulator activity; GO:0043167 ion binding; GO:0043168 anion binding; GO:0048487 beta-tubulin binding; GO:00973…			D	KOG3431	Apoptosis-related protein/predicted DNA-binding protein
O14737	105	K	1.61147	Up	Programmed cell death protein 5 OS=Homo sapiens OX=9606 GN=PDCD5 PE=1 SV=3	PDCD5	1	1.14032e-28	188.6	2	VSQQTEK(1)TTTVK	-0.97446	106330	163660	0.76999	1.24081	cytoplasm	K06875			GO:0006915 apoptotic process; GO:0008219 cell death; GO:0008285 negative regulation of cell population proliferation; GO:0009719 response to endogenous stimulus; GO:0009893 positive regulation of metabolic process; GO:0009966 regulation of signal transduction; GO:0009967 positive regulation of signal transduction; GO:0009987 cellular process; GO:0010033 response to organic substance; GO:0010468 r…	GO:0005622 intracellular anatomical structure; GO:0005634 nucleus; GO:0005737 cytoplasm; GO:0005829 cytosol; GO:0043226 organelle; GO:0043227 membrane-bounded organelle; GO:0043229 intracellular organelle; GO:0043231 intracellular membrane-bounded organelle;	GO:0005488 binding; GO:0005515 protein binding; GO:0005539 glycosaminoglycan binding; GO:0008047 enzyme activator activity; GO:0008092 cytoskeletal protein binding; GO:0008201 heparin binding; GO:0010698 acetyltransferase activator activity; GO:0015631 tubulin binding; GO:0030234 enzyme regulator activity; GO:0043167 ion binding; GO:0043168 anion binding; GO:0048487 beta-tubulin binding; GO:00973…			D	KOG3431	Apoptosis-related protein/predicted DNA-binding protein
O14744	240	K	1.06215	None	Protein arginine N-methyltransferase 5 OS=Homo sapiens OX=9606 GN=PRMT5 PE=1 SV=4	PRMT5	1	2.49843e-20	166.65	2	AAILPTSIFLTNK(1)K	2.4371	420060	451690	0.969684	1.02995	cytoplasm	K02516			GO:0000003 reproduction; GO:0000122 negative regulation of transcription by RNA polymerase II; GO:0000375 RNA splicing, via transesterification reactions; GO:0000377 RNA splicing, via transesterification reactions with bulged adenosine as nucleophile; GO:0000387 spliceosomal snRNP assembly; GO:0000398 mRNA splicing, via spliceosome; GO:0000578 embryonic axis specification; GO:0001775 cell activat…	GO:0005622 intracellular anatomical structure; GO:0005634 nucleus; GO:0005654 nucleoplasm; GO:0005737 cytoplasm; GO:0005794 Golgi apparatus; GO:0005829 cytosol; GO:0012505 endomembrane system; GO:0031974 membrane-enclosed lumen; GO:0031981 nuclear lumen; GO:0032991 protein-containing complex; GO:0034708 methyltransferase complex; GO:0034709 methylosome; GO:0035097 histone methyltransferase comple…	GO:0000166 nucleotide binding; GO:0000976 transcription cis-regulatory region binding; GO:0000977 RNA polymerase II transcription regulatory region sequence-specific DNA binding; GO:0000978 RNA polymerase II cis-regulatory region sequence-specific DNA binding; GO:0000987 cis-regulatory region sequence-specific DNA binding; GO:0001067 transcription regulatory region nucleic acid binding; GO:000203…	PF17285; PF05185; PF17286	PF17285 PRMT5 TIM barrel domain; PF05185 PRMT5 arginine-N-methyltransferase; PF17286 PRMT5 oligomerisation domain	D	KOG0822	Protein kinase inhibitor	WP3594 CIRCADIAN RHYTHM GENES;WP4947 NITRIC OXIDE METABOLISM IN CYSTIC FIBROSIS;WP4533 TRANSCRIPTION COFACTORS SKI AND SKIL PROTEIN PARTNERS	http://www.wikipathways.org/instance/WP3594_r117682;http://www.wikipathways.org/instance/WP4947_r118070;http://www.wikipathways.org/instance/WP4533_r103380	Transcription factor	R-HSA-191859 snRNP Assembly;R-HSA-194441 Metabolism of non-coding RNA;R-HSA-212436 Generic Transcription Pathway;R-HSA-3214858 RMTs methylate histone arginines;R-HSA-3247509 Chromatin modifying enzymes;R-HSA-3700989 Transcriptional Regulation by TP53;R-HSA-4839726 Chromatin organization;R-HSA-5633007 Regulation of TP53 Activity;R-HSA-6804760 Regulation of TP53 Activity through Methylation;R-HSA-7…	https://reactome.org/PathwayBrowser/#/R-HSA-191859;https://reactome.org/PathwayBrowser/#/R-HSA-194441;https://reactome.org/PathwayBrowser/#/R-HSA-212436;https://reactome.org/PathwayBrowser/#/R-HSA-3214858;https://reactome.org/PathwayBrowser/#/R-HSA-3247509;https://reactome.org/PathwayBrowser/#/R-HSA-3700989;https://reactome.org/PathwayBrowser/#/R-HSA-4839726;https://reactome.org/PathwayBrowser/#/…	G2M CHECKPOINT	https://www.gsea-msigdb.org/gsea/msigdb/cards/HALLMARK_G2M_CHECKPOINT
O14745	350	K		None	Na(+)/H(+) exchange regulatory cofactor NHE-RF1 OS=Homo sapiens OX=9606 GN=SLC9A3R1 PE=1 SV=4	SLC9A3R1	1	0.00133913	62.271	2	RAPQMDWSK(1)K	-0.47886	0	21572		1.00944	nucleus	K13365	SLC9A3R1; sodium/hydrogen exchange regulatory cofactor NHE-RF1	hsa05165 Human papillomavirus infection; hsa05130 Pathogenic Escherichia coli infection; hsa04928 Parathyroid hormone synthesis, secretion and action; hsa04530 Tight junction	GO:0000902 cell morphogenesis; GO:0000904 cell morphogenesis involved in differentiation; GO:0001738 morphogenesis of a polarized epithelium; GO:0001932 regulation of protein phosphorylation; GO:0001933 negative regulation of protein phosphorylation; GO:0002009 morphogenesis of an epithelium; GO:0002028 regulation of sodium ion transport; GO:0002064 epithelial cell development; GO:0002065 columna…	GO:0001726 ruffle; GO:0005622 intracellular anatomical structure; GO:0005737 cytoplasm; GO:0005856 cytoskeleton; GO:0005886 plasma membrane; GO:0005902 microvillus; GO:0005903 brush border; GO:0005929 cilium; GO:0012505 endomembrane system; GO:0015629 actin cytoskeleton; GO:0016020 membrane; GO:0016324 apical plasma membrane; GO:0030175 filopodium; GO:0031252 cell leading edge; GO:0031253 cell pr…	GO:0001664 G protein-coupled receptor binding; GO:0005102 signaling receptor binding; GO:0005198 structural molecule activity; GO:0005488 binding; GO:0005515 protein binding; GO:0008013 beta-catenin binding; GO:0008092 cytoskeletal protein binding; GO:0016247 channel regulator activity; GO:0017022 myosin binding; GO:0017081 chloride channel regulator activity; GO:0019899 enzyme binding; GO:001990…	PF00595; PF09007	PF00595 PDZ domain; PF09007 EBP50, C-terminal	S	KOG3528	FOG: PDZ domain						ESTROGEN RESPONSE EARLY;ESTROGEN RESPONSE LATE;MTORC1 SIGNALING	https://www.gsea-msigdb.org/gsea/msigdb/cards/HALLMARK_ESTROGEN_RESPONSE_EARLY;https://www.gsea-msigdb.org/gsea/msigdb/cards/HALLMARK_ESTROGEN_RESPONSE_LATE;https://www.gsea-msigdb.org/gsea/msigdb/cards/HALLMARK_MTORC1_SIGNALING
O14745	34	K		None	Na(+)/H(+) exchange regulatory cofactor NHE-RF1 OS=Homo sapiens OX=9606 GN=SLC9A3R1 PE=1 SV=4	SLC9A3R1	1	0.010638	49.058	2	GK(1)LGQYIR	-0.77904	0	11402		1.00944	nucleus	K13365	SLC9A3R1; sodium/hydrogen exchange regulatory cofactor NHE-RF1	hsa05165 Human papillomavirus infection; hsa05130 Pathogenic Escherichia coli infection; hsa04928 Parathyroid hormone synthesis, secretion and action; hsa04530 Tight junction	GO:0000902 cell morphogenesis; GO:0000904 cell morphogenesis involved in differentiation; GO:0001738 morphogenesis of a polarized epithelium; GO:0001932 regulation of protein phosphorylation; GO:0001933 negative regulation of protein phosphorylation; GO:0002009 morphogenesis of an epithelium; GO:0002028 regulation of sodium ion transport; GO:0002064 epithelial cell development; GO:0002065 columna…	GO:0001726 ruffle; GO:0005622 intracellular anatomical structure; GO:0005737 cytoplasm; GO:0005856 cytoskeleton; GO:0005886 plasma membrane; GO:0005902 microvillus; GO:0005903 brush border; GO:0005929 cilium; GO:0012505 endomembrane system; GO:0015629 actin cytoskeleton; GO:0016020 membrane; GO:0016324 apical plasma membrane; GO:0030175 filopodium; GO:0031252 cell leading edge; GO:0031253 cell pr…	GO:0001664 G protein-coupled receptor binding; GO:0005102 signaling receptor binding; GO:0005198 structural molecule activity; GO:0005488 binding; GO:0005515 protein binding; GO:0008013 beta-catenin binding; GO:0008092 cytoskeletal protein binding; GO:0016247 channel regulator activity; GO:0017022 myosin binding; GO:0017081 chloride channel regulator activity; GO:0019899 enzyme binding; GO:001990…	PF00595; PF09007	PF00595 PDZ domain; PF09007 EBP50, C-terminal	S	KOG3528	FOG: PDZ domain						ESTROGEN RESPONSE EARLY;ESTROGEN RESPONSE LATE;MTORC1 SIGNALING	https://www.gsea-msigdb.org/gsea/msigdb/cards/HALLMARK_ESTROGEN_RESPONSE_EARLY;https://www.gsea-msigdb.org/gsea/msigdb/cards/HALLMARK_ESTROGEN_RESPONSE_LATE;https://www.gsea-msigdb.org/gsea/msigdb/cards/HALLMARK_MTORC1_SIGNALING
O14753	202	K		None	Putative transcription factor Ovo-like 1 OS=Homo sapiens OX=9606 GN=OVOL1 PE=1 SV=3	OVOL1	1	0.00147496	72.038	2	IHGVQQK(1)YAYK	-1.8939	18693	33053			nucleus	K09216			GO:0000003 reproduction; GO:0000122 negative regulation of transcription by RNA polymerase II; GO:0001655 urogenital system development; GO:0001822 kidney development; GO:0002009 morphogenesis of an epithelium; GO:0002165 instar larval or pupal development; GO:0003002 regionalization; GO:0003006 developmental process involved in reproduction; GO:0006355 regulation of transcription, DNA-templated;…	GO:0005622 intracellular anatomical structure; GO:0005634 nucleus; GO:0043226 organelle; GO:0043227 membrane-bounded organelle; GO:0043229 intracellular organelle; GO:0043231 intracellular membrane-bounded organelle;	GO:0000976 transcription cis-regulatory region binding; GO:0000977 RNA polymerase II transcription regulatory region sequence-specific DNA binding; GO:0000978 RNA polymerase II cis-regulatory region sequence-specific DNA binding; GO:0000981 DNA-binding transcription factor activity, RNA polymerase II-specific; GO:0000987 cis-regulatory region sequence-specific DNA binding; GO:0001067 transcriptio…	PF00096; PF13465	PF00096 Zinc finger, C2H2 type; PF13465 Zinc-finger double domain	K	KOG3576	Ovo and related transcription factors
O14753	248	K		None	Putative transcription factor Ovo-like 1 OS=Homo sapiens OX=9606 GN=OVOL1 PE=1 SV=3	OVOL1	1	0.000270927	41.499	2	K(1)VAVALQNTVTSLLQGSPHL	-0.72711	17869	0			nucleus	K09216			GO:0000003 reproduction; GO:0000122 negative regulation of transcription by RNA polymerase II; GO:0001655 urogenital system development; GO:0001822 kidney development; GO:0002009 morphogenesis of an epithelium; GO:0002165 instar larval or pupal development; GO:0003002 regionalization; GO:0003006 developmental process involved in reproduction; GO:0006355 regulation of transcription, DNA-templated;…	GO:0005622 intracellular anatomical structure; GO:0005634 nucleus; GO:0043226 organelle; GO:0043227 membrane-bounded organelle; GO:0043229 intracellular organelle; GO:0043231 intracellular membrane-bounded organelle;	GO:0000976 transcription cis-regulatory region binding; GO:0000977 RNA polymerase II transcription regulatory region sequence-specific DNA binding; GO:0000978 RNA polymerase II cis-regulatory region sequence-specific DNA binding; GO:0000981 DNA-binding transcription factor activity, RNA polymerase II-specific; GO:0000987 cis-regulatory region sequence-specific DNA binding; GO:0001067 transcriptio…	PF00096; PF13465	PF00096 Zinc finger, C2H2 type; PF13465 Zinc-finger double domain	K	KOG3576	Ovo and related transcription factors
O14753	106	K		None	Putative transcription factor Ovo-like 1 OS=Homo sapiens OX=9606 GN=OVOL1 PE=1 SV=3	OVOL1	1	7.6461e-05	67.887	2	MK(1)VTLGDSPSGDLFTCR	-2.7807	10720	8662			nucleus	K09216			GO:0000003 reproduction; GO:0000122 negative regulation of transcription by RNA polymerase II; GO:0001655 urogenital system development; GO:0001822 kidney development; GO:0002009 morphogenesis of an epithelium; GO:0002165 instar larval or pupal development; GO:0003002 regionalization; GO:0003006 developmental process involved in reproduction; GO:0006355 regulation of transcription, DNA-templated;…	GO:0005622 intracellular anatomical structure; GO:0005634 nucleus; GO:0043226 organelle; GO:0043227 membrane-bounded organelle; GO:0043229 intracellular organelle; GO:0043231 intracellular membrane-bounded organelle;	GO:0000976 transcription cis-regulatory region binding; GO:0000977 RNA polymerase II transcription regulatory region sequence-specific DNA binding; GO:0000978 RNA polymerase II cis-regulatory region sequence-specific DNA binding; GO:0000981 DNA-binding transcription factor activity, RNA polymerase II-specific; GO:0000987 cis-regulatory region sequence-specific DNA binding; GO:0001067 transcriptio…	PF00096; PF13465	PF00096 Zinc finger, C2H2 type; PF13465 Zinc-finger double domain	K	KOG3576	Ovo and related transcription factors
O14776	624	K	0.996535	None	Transcription elongation regulator 1 OS=Homo sapiens OX=9606 GN=TCERG1 PE=1 SV=2	TCERG1	1	1.01426e-29	195.36	2	EEQELMEEINEDEPVK(1)AK	-0.85944	84708	81219	1.0017	0.998231	nucleus	K12824	TCERG1; transcription elongation regulator 1	hsa03040 Spliceosome	GO:0000122 negative regulation of transcription by RNA polymerase II; GO:0000375 RNA splicing, via transesterification reactions; GO:0000377 RNA splicing, via transesterification reactions with bulged adenosine as nucleophile; GO:0000398 mRNA splicing, via spliceosome; GO:0006139 nucleobase-containing compound metabolic process; GO:0006351 transcription, DNA-templated; GO:0006355 regulation of tr…	GO:0005622 intracellular anatomical structure; GO:0005634 nucleus; GO:0005654 nucleoplasm; GO:0031974 membrane-enclosed lumen; GO:0031981 nuclear lumen; GO:0034399 nuclear periphery; GO:0043226 organelle; GO:0043227 membrane-bounded organelle; GO:0043229 intracellular organelle; GO:0043231 intracellular membrane-bounded organelle; GO:0043233 organelle lumen; GO:0070013 intracellular organelle lum…	GO:0003700 DNA-binding transcription factor activity; GO:0003712 transcription coregulator activity; GO:0003713 transcription coactivator activity; GO:0003714 transcription corepressor activity; GO:0005488 binding; GO:0005515 protein binding; GO:0008134 transcription factor binding; GO:0042802 identical protein binding; GO:0070064 proline-rich region binding; GO:0140110 transcription regulator ac…	PF00397	PF00397 WW domain	K	KOG0155	Transcription factor CA150
O14818	27	K	0.57741	Down	Proteasome subunit alpha type-7 OS=Homo sapiens OX=9606 GN=PSMA7 PE=1 SV=1	PSMA7	1	6.27368e-09	88.203	3	AITVFSPDGHLFQVEYAQEAVK(1)K	-1.3276	30665	17803	1.26883	0.732634	cytoplasm	K02731	PSMA7; 20S proteasome subunit alpha 4 [EC:3.4.25.1]	hsa05017 Spinocerebellar ataxia; hsa05016 Huntington disease; hsa03050 Proteasome; hsa05012 Parkinson disease; hsa05010 Alzheimer disease; hsa05022 Pathways of neurodegeneration - multiple diseases; hsa05014 Amyotrophic lateral sclerosis; hsa05020 Prion disease	GO:0006464 cellular protein modification process; GO:0006508 proteolysis; GO:0006511 ubiquitin-dependent protein catabolic process; GO:0006807 nitrogen compound metabolic process; GO:0008152 metabolic process; GO:0009056 catabolic process; GO:0009057 macromolecule catabolic process; GO:0009987 cellular process; GO:0010498 proteasomal protein catabolic process; GO:0016579 protein deubiquitination;…	GO:0000502 proteasome complex; GO:0005622 intracellular anatomical structure; GO:0005634 nucleus; GO:0005654 nucleoplasm; GO:0005737 cytoplasm; GO:0005829 cytosol; GO:0005839 proteasome core complex; GO:0019773 proteasome core complex, alpha-subunit complex; GO:0031974 membrane-enclosed lumen; GO:0031981 nuclear lumen; GO:0032991 protein-containing complex; GO:0043226 organelle; GO:0043227 membra…	GO:0005488 binding; GO:0005515 protein binding; GO:0042802 identical protein binding;	PF00227	PF00227 Proteasome subunit	O	KOG0183	20S proteasome, regulatory subunit alpha type PSMA7/PRE6	WP5124 ALZHEIMERS DISEASE;WP2059 ALZHEIMERS DISEASE AND MIRNA EFFECTS;WP183 PROTEASOME DEGRADATION	http://www.wikipathways.org/instance/WP5124_r119432;http://www.wikipathways.org/instance/WP2059_r119468;http://www.wikipathways.org/instance/WP183_r117060		R-HSA-109581 Apoptosis;R-HSA-1168372 Downstream signaling events of B Cell Receptor (BCR);R-HSA-1169091 Activation of NF-kappaB in B cells;R-HSA-1234174 Cellular response to hypoxia;R-HSA-1234176 Oxygen-dependent proline hydroxylation of Hypoxia-inducible Factor Alpha;R-HSA-1236974 ER-Phagosome pathway;R-HSA-1236975 Antigen processing-Cross presentation;R-HSA-1236978 Cross-presentation of soluble…		MYC TARGETS V1	https://www.gsea-msigdb.org/gsea/msigdb/cards/HALLMARK_MYC_TARGETS_V1
O14818	61	K		None	Proteasome subunit alpha type-7 OS=Homo sapiens OX=9606 GN=PSMA7 PE=1 SV=1	PSMA7	1	5.17997e-05	59.171	2	K(1)ICALDDNVCMAFAGLTADAR	5.6719	26956	0	1.00273		cytoplasm	K02731	PSMA7; 20S proteasome subunit alpha 4 [EC:3.4.25.1]	hsa05017 Spinocerebellar ataxia; hsa05016 Huntington disease; hsa03050 Proteasome; hsa05012 Parkinson disease; hsa05010 Alzheimer disease; hsa05022 Pathways of neurodegeneration - multiple diseases; hsa05014 Amyotrophic lateral sclerosis; hsa05020 Prion disease	GO:0006464 cellular protein modification process; GO:0006508 proteolysis; GO:0006511 ubiquitin-dependent protein catabolic process; GO:0006807 nitrogen compound metabolic process; GO:0008152 metabolic process; GO:0009056 catabolic process; GO:0009057 macromolecule catabolic process; GO:0009987 cellular process; GO:0010498 proteasomal protein catabolic process; GO:0016579 protein deubiquitination;…	GO:0000502 proteasome complex; GO:0005622 intracellular anatomical structure; GO:0005634 nucleus; GO:0005654 nucleoplasm; GO:0005737 cytoplasm; GO:0005829 cytosol; GO:0005839 proteasome core complex; GO:0019773 proteasome core complex, alpha-subunit complex; GO:0031974 membrane-enclosed lumen; GO:0031981 nuclear lumen; GO:0032991 protein-containing complex; GO:0043226 organelle; GO:0043227 membra…	GO:0005488 binding; GO:0005515 protein binding; GO:0042802 identical protein binding;	PF00227	PF00227 Proteasome subunit	O	KOG0183	20S proteasome, regulatory subunit alpha type PSMA7/PRE6	WP5124 ALZHEIMERS DISEASE;WP2059 ALZHEIMERS DISEASE AND MIRNA EFFECTS;WP183 PROTEASOME DEGRADATION	http://www.wikipathways.org/instance/WP5124_r119432;http://www.wikipathways.org/instance/WP2059_r119468;http://www.wikipathways.org/instance/WP183_r117060		R-HSA-109581 Apoptosis;R-HSA-1168372 Downstream signaling events of B Cell Receptor (BCR);R-HSA-1169091 Activation of NF-kappaB in B cells;R-HSA-1234174 Cellular response to hypoxia;R-HSA-1234176 Oxygen-dependent proline hydroxylation of Hypoxia-inducible Factor Alpha;R-HSA-1236974 ER-Phagosome pathway;R-HSA-1236975 Antigen processing-Cross presentation;R-HSA-1236978 Cross-presentation of soluble…		MYC TARGETS V1	https://www.gsea-msigdb.org/gsea/msigdb/cards/HALLMARK_MYC_TARGETS_V1
O14818	52	K	1.03091	None	Proteasome subunit alpha type-7 OS=Homo sapiens OX=9606 GN=PSMA7 PE=1 SV=1	PSMA7	1	0.000183341	120.33	2	SVAK(1)LQDER	0.14255	20773	21532	0.984741	1.01518	cytoplasm	K02731	PSMA7; 20S proteasome subunit alpha 4 [EC:3.4.25.1]	hsa05017 Spinocerebellar ataxia; hsa05016 Huntington disease; hsa03050 Proteasome; hsa05012 Parkinson disease; hsa05010 Alzheimer disease; hsa05022 Pathways of neurodegeneration - multiple diseases; hsa05014 Amyotrophic lateral sclerosis; hsa05020 Prion disease	GO:0006464 cellular protein modification process; GO:0006508 proteolysis; GO:0006511 ubiquitin-dependent protein catabolic process; GO:0006807 nitrogen compound metabolic process; GO:0008152 metabolic process; GO:0009056 catabolic process; GO:0009057 macromolecule catabolic process; GO:0009987 cellular process; GO:0010498 proteasomal protein catabolic process; GO:0016579 protein deubiquitination;…	GO:0000502 proteasome complex; GO:0005622 intracellular anatomical structure; GO:0005634 nucleus; GO:0005654 nucleoplasm; GO:0005737 cytoplasm; GO:0005829 cytosol; GO:0005839 proteasome core complex; GO:0019773 proteasome core complex, alpha-subunit complex; GO:0031974 membrane-enclosed lumen; GO:0031981 nuclear lumen; GO:0032991 protein-containing complex; GO:0043226 organelle; GO:0043227 membra…	GO:0005488 binding; GO:0005515 protein binding; GO:0042802 identical protein binding;	PF00227	PF00227 Proteasome subunit	O	KOG0183	20S proteasome, regulatory subunit alpha type PSMA7/PRE6	WP5124 ALZHEIMERS DISEASE;WP2059 ALZHEIMERS DISEASE AND MIRNA EFFECTS;WP183 PROTEASOME DEGRADATION	http://www.wikipathways.org/instance/WP5124_r119432;http://www.wikipathways.org/instance/WP2059_r119468;http://www.wikipathways.org/instance/WP183_r117060		R-HSA-109581 Apoptosis;R-HSA-1168372 Downstream signaling events of B Cell Receptor (BCR);R-HSA-1169091 Activation of NF-kappaB in B cells;R-HSA-1234174 Cellular response to hypoxia;R-HSA-1234176 Oxygen-dependent proline hydroxylation of Hypoxia-inducible Factor Alpha;R-HSA-1236974 ER-Phagosome pathway;R-HSA-1236975 Antigen processing-Cross presentation;R-HSA-1236978 Cross-presentation of soluble…		MYC TARGETS V1	https://www.gsea-msigdb.org/gsea/msigdb/cards/HALLMARK_MYC_TARGETS_V1
O14867	226	K		None	Transcription regulator protein BACH1 OS=Homo sapiens OX=9606 GN=BACH1 PE=1 SV=2	BACH1	1	0.00347506	74.849	2	DAALALPSLCPK(1)YR	-0.17469	0	31116			nucleus	K09042			GO:0000082 G1/S transition of mitotic cell cycle; GO:0000083 regulation of transcription involved in G1/S transition of mitotic cell cycle; GO:0000086 G2/M transition of mitotic cell cycle; GO:0000117 regulation of transcription involved in G2/M transition of mitotic cell cycle; GO:0000122 negative regulation of transcription by RNA polymerase II; GO:0000278 mitotic cell cycle; GO:0001666 respons…	GO:0000151 ubiquitin ligase complex; GO:0005622 intracellular anatomical structure; GO:0005634 nucleus; GO:0031461 cullin-RING ubiquitin ligase complex; GO:0031463 Cul3-RING ubiquitin ligase complex; GO:0032991 protein-containing complex; GO:0043226 organelle; GO:0043227 membrane-bounded organelle; GO:0043229 intracellular organelle; GO:0043231 intracellular membrane-bounded organelle; GO:1902494…	GO:0000976 transcription cis-regulatory region binding; GO:0000977 RNA polymerase II transcription regulatory region sequence-specific DNA binding; GO:0000981 DNA-binding transcription factor activity, RNA polymerase II-specific; GO:0001067 transcription regulatory region nucleic acid binding; GO:0001227 DNA-binding transcription repressor activity, RNA polymerase II-specific; GO:0001228 DNA-bind…	PF00651	PF00651 BTB/POZ domain	K	KOG3863	bZIP transcription factor NRF1	WP4313 FERROPTOSIS;WP1971 INTEGRATED CANCER PATHWAY	http://www.wikipathways.org/instance/WP4313_r120500;http://www.wikipathways.org/instance/WP1971_r117762	Transcription factor	R-HSA-2262752 Cellular responses to stress;R-HSA-8953897 Cellular responses to stimuli;R-HSA-9707564 Cytoprotection by HMOX1;R-HSA-9707587 Regulation of HMOX1 expression and activity;R-HSA-9707616 Heme signaling;R-HSA-9708530 Regulation of BACH1 activity;R-HSA-9711123 Cellular response to chemical stress;R-HSA-9755511 KEAP1-NFE2L2 pathway;R-HSA-9759194 Nuclear events mediated by NFE2L2	https://reactome.org/PathwayBrowser/#/R-HSA-2262752;https://reactome.org/PathwayBrowser/#/R-HSA-8953897;https://reactome.org/PathwayBrowser/#/R-HSA-9707564;https://reactome.org/PathwayBrowser/#/R-HSA-9707587;https://reactome.org/PathwayBrowser/#/R-HSA-9707616;https://reactome.org/PathwayBrowser/#/R-HSA-9708530;https://reactome.org/PathwayBrowser/#/R-HSA-9711123;https://reactome.org/PathwayBrowser…	HEME METABOLISM	https://www.gsea-msigdb.org/gsea/msigdb/cards/HALLMARK_HEME_METABOLISM
O14867	232	K		None	Transcription regulator protein BACH1 OS=Homo sapiens OX=9606 GN=BACH1 PE=1 SV=2	BACH1	1	0.00148289	72.038	2	FQK(1)AFGTDR	0.13083	20748	0			nucleus	K09042			GO:0000082 G1/S transition of mitotic cell cycle; GO:0000083 regulation of transcription involved in G1/S transition of mitotic cell cycle; GO:0000086 G2/M transition of mitotic cell cycle; GO:0000117 regulation of transcription involved in G2/M transition of mitotic cell cycle; GO:0000122 negative regulation of transcription by RNA polymerase II; GO:0000278 mitotic cell cycle; GO:0001666 respons…	GO:0000151 ubiquitin ligase complex; GO:0005622 intracellular anatomical structure; GO:0005634 nucleus; GO:0031461 cullin-RING ubiquitin ligase complex; GO:0031463 Cul3-RING ubiquitin ligase complex; GO:0032991 protein-containing complex; GO:0043226 organelle; GO:0043227 membrane-bounded organelle; GO:0043229 intracellular organelle; GO:0043231 intracellular membrane-bounded organelle; GO:1902494…	GO:0000976 transcription cis-regulatory region binding; GO:0000977 RNA polymerase II transcription regulatory region sequence-specific DNA binding; GO:0000981 DNA-binding transcription factor activity, RNA polymerase II-specific; GO:0001067 transcription regulatory region nucleic acid binding; GO:0001227 DNA-binding transcription repressor activity, RNA polymerase II-specific; GO:0001228 DNA-bind…	PF00651	PF00651 BTB/POZ domain	K	KOG3863	bZIP transcription factor NRF1	WP4313 FERROPTOSIS;WP1971 INTEGRATED CANCER PATHWAY	http://www.wikipathways.org/instance/WP4313_r120500;http://www.wikipathways.org/instance/WP1971_r117762	Transcription factor	R-HSA-2262752 Cellular responses to stress;R-HSA-8953897 Cellular responses to stimuli;R-HSA-9707564 Cytoprotection by HMOX1;R-HSA-9707587 Regulation of HMOX1 expression and activity;R-HSA-9707616 Heme signaling;R-HSA-9708530 Regulation of BACH1 activity;R-HSA-9711123 Cellular response to chemical stress;R-HSA-9755511 KEAP1-NFE2L2 pathway;R-HSA-9759194 Nuclear events mediated by NFE2L2	https://reactome.org/PathwayBrowser/#/R-HSA-2262752;https://reactome.org/PathwayBrowser/#/R-HSA-8953897;https://reactome.org/PathwayBrowser/#/R-HSA-9707564;https://reactome.org/PathwayBrowser/#/R-HSA-9707587;https://reactome.org/PathwayBrowser/#/R-HSA-9707616;https://reactome.org/PathwayBrowser/#/R-HSA-9708530;https://reactome.org/PathwayBrowser/#/R-HSA-9711123;https://reactome.org/PathwayBrowser…	HEME METABOLISM	https://www.gsea-msigdb.org/gsea/msigdb/cards/HALLMARK_HEME_METABOLISM
O14867	578	K		None	Transcription regulator protein BACH1 OS=Homo sapiens OX=9606 GN=BACH1 PE=1 SV=2	BACH1	1	3.58695e-14	126.32	2	K(1)LDCIQNLESEIEK	-0.81496	67746	58471			nucleus	K09042			GO:0000082 G1/S transition of mitotic cell cycle; GO:0000083 regulation of transcription involved in G1/S transition of mitotic cell cycle; GO:0000086 G2/M transition of mitotic cell cycle; GO:0000117 regulation of transcription involved in G2/M transition of mitotic cell cycle; GO:0000122 negative regulation of transcription by RNA polymerase II; GO:0000278 mitotic cell cycle; GO:0001666 respons…	GO:0000151 ubiquitin ligase complex; GO:0005622 intracellular anatomical structure; GO:0005634 nucleus; GO:0031461 cullin-RING ubiquitin ligase complex; GO:0031463 Cul3-RING ubiquitin ligase complex; GO:0032991 protein-containing complex; GO:0043226 organelle; GO:0043227 membrane-bounded organelle; GO:0043229 intracellular organelle; GO:0043231 intracellular membrane-bounded organelle; GO:1902494…	GO:0000976 transcription cis-regulatory region binding; GO:0000977 RNA polymerase II transcription regulatory region sequence-specific DNA binding; GO:0000981 DNA-binding transcription factor activity, RNA polymerase II-specific; GO:0001067 transcription regulatory region nucleic acid binding; GO:0001227 DNA-binding transcription repressor activity, RNA polymerase II-specific; GO:0001228 DNA-bind…	PF00651	PF00651 BTB/POZ domain	K	KOG3863	bZIP transcription factor NRF1	WP4313 FERROPTOSIS;WP1971 INTEGRATED CANCER PATHWAY	http://www.wikipathways.org/instance/WP4313_r120500;http://www.wikipathways.org/instance/WP1971_r117762	Transcription factor	R-HSA-2262752 Cellular responses to stress;R-HSA-8953897 Cellular responses to stimuli;R-HSA-9707564 Cytoprotection by HMOX1;R-HSA-9707587 Regulation of HMOX1 expression and activity;R-HSA-9707616 Heme signaling;R-HSA-9708530 Regulation of BACH1 activity;R-HSA-9711123 Cellular response to chemical stress;R-HSA-9755511 KEAP1-NFE2L2 pathway;R-HSA-9759194 Nuclear events mediated by NFE2L2	https://reactome.org/PathwayBrowser/#/R-HSA-2262752;https://reactome.org/PathwayBrowser/#/R-HSA-8953897;https://reactome.org/PathwayBrowser/#/R-HSA-9707564;https://reactome.org/PathwayBrowser/#/R-HSA-9707587;https://reactome.org/PathwayBrowser/#/R-HSA-9707616;https://reactome.org/PathwayBrowser/#/R-HSA-9708530;https://reactome.org/PathwayBrowser/#/R-HSA-9711123;https://reactome.org/PathwayBrowser…	HEME METABOLISM	https://www.gsea-msigdb.org/gsea/msigdb/cards/HALLMARK_HEME_METABOLISM
O14867	185	K		None	Transcription regulator protein BACH1 OS=Homo sapiens OX=9606 GN=BACH1 PE=1 SV=2	BACH1	1	0.0282819	48.157	2	NVQTPQCK(1)LR	0.34527	0	40027			nucleus	K09042			GO:0000082 G1/S transition of mitotic cell cycle; GO:0000083 regulation of transcription involved in G1/S transition of mitotic cell cycle; GO:0000086 G2/M transition of mitotic cell cycle; GO:0000117 regulation of transcription involved in G2/M transition of mitotic cell cycle; GO:0000122 negative regulation of transcription by RNA polymerase II; GO:0000278 mitotic cell cycle; GO:0001666 respons…	GO:0000151 ubiquitin ligase complex; GO:0005622 intracellular anatomical structure; GO:0005634 nucleus; GO:0031461 cullin-RING ubiquitin ligase complex; GO:0031463 Cul3-RING ubiquitin ligase complex; GO:0032991 protein-containing complex; GO:0043226 organelle; GO:0043227 membrane-bounded organelle; GO:0043229 intracellular organelle; GO:0043231 intracellular membrane-bounded organelle; GO:1902494…	GO:0000976 transcription cis-regulatory region binding; GO:0000977 RNA polymerase II transcription regulatory region sequence-specific DNA binding; GO:0000981 DNA-binding transcription factor activity, RNA polymerase II-specific; GO:0001067 transcription regulatory region nucleic acid binding; GO:0001227 DNA-binding transcription repressor activity, RNA polymerase II-specific; GO:0001228 DNA-bind…	PF00651	PF00651 BTB/POZ domain	K	KOG3863	bZIP transcription factor NRF1	WP4313 FERROPTOSIS;WP1971 INTEGRATED CANCER PATHWAY	http://www.wikipathways.org/instance/WP4313_r120500;http://www.wikipathways.org/instance/WP1971_r117762	Transcription factor	R-HSA-2262752 Cellular responses to stress;R-HSA-8953897 Cellular responses to stimuli;R-HSA-9707564 Cytoprotection by HMOX1;R-HSA-9707587 Regulation of HMOX1 expression and activity;R-HSA-9707616 Heme signaling;R-HSA-9708530 Regulation of BACH1 activity;R-HSA-9711123 Cellular response to chemical stress;R-HSA-9755511 KEAP1-NFE2L2 pathway;R-HSA-9759194 Nuclear events mediated by NFE2L2	https://reactome.org/PathwayBrowser/#/R-HSA-2262752;https://reactome.org/PathwayBrowser/#/R-HSA-8953897;https://reactome.org/PathwayBrowser/#/R-HSA-9707564;https://reactome.org/PathwayBrowser/#/R-HSA-9707587;https://reactome.org/PathwayBrowser/#/R-HSA-9707616;https://reactome.org/PathwayBrowser/#/R-HSA-9708530;https://reactome.org/PathwayBrowser/#/R-HSA-9711123;https://reactome.org/PathwayBrowser…	HEME METABOLISM	https://www.gsea-msigdb.org/gsea/msigdb/cards/HALLMARK_HEME_METABOLISM
O14867	156	K		None	Transcription regulator protein BACH1 OS=Homo sapiens OX=9606 GN=BACH1 PE=1 SV=2	BACH1	1	0.011941	51.531	2	TDLK(1)LSLLDQR	-2.3295	75579	82002			nucleus	K09042			GO:0000082 G1/S transition of mitotic cell cycle; GO:0000083 regulation of transcription involved in G1/S transition of mitotic cell cycle; GO:0000086 G2/M transition of mitotic cell cycle; GO:0000117 regulation of transcription involved in G2/M transition of mitotic cell cycle; GO:0000122 negative regulation of transcription by RNA polymerase II; GO:0000278 mitotic cell cycle; GO:0001666 respons…	GO:0000151 ubiquitin ligase complex; GO:0005622 intracellular anatomical structure; GO:0005634 nucleus; GO:0031461 cullin-RING ubiquitin ligase complex; GO:0031463 Cul3-RING ubiquitin ligase complex; GO:0032991 protein-containing complex; GO:0043226 organelle; GO:0043227 membrane-bounded organelle; GO:0043229 intracellular organelle; GO:0043231 intracellular membrane-bounded organelle; GO:1902494…	GO:0000976 transcription cis-regulatory region binding; GO:0000977 RNA polymerase II transcription regulatory region sequence-specific DNA binding; GO:0000981 DNA-binding transcription factor activity, RNA polymerase II-specific; GO:0001067 transcription regulatory region nucleic acid binding; GO:0001227 DNA-binding transcription repressor activity, RNA polymerase II-specific; GO:0001228 DNA-bind…	PF00651	PF00651 BTB/POZ domain	K	KOG3863	bZIP transcription factor NRF1	WP4313 FERROPTOSIS;WP1971 INTEGRATED CANCER PATHWAY	http://www.wikipathways.org/instance/WP4313_r120500;http://www.wikipathways.org/instance/WP1971_r117762	Transcription factor	R-HSA-2262752 Cellular responses to stress;R-HSA-8953897 Cellular responses to stimuli;R-HSA-9707564 Cytoprotection by HMOX1;R-HSA-9707587 Regulation of HMOX1 expression and activity;R-HSA-9707616 Heme signaling;R-HSA-9708530 Regulation of BACH1 activity;R-HSA-9711123 Cellular response to chemical stress;R-HSA-9755511 KEAP1-NFE2L2 pathway;R-HSA-9759194 Nuclear events mediated by NFE2L2	https://reactome.org/PathwayBrowser/#/R-HSA-2262752;https://reactome.org/PathwayBrowser/#/R-HSA-8953897;https://reactome.org/PathwayBrowser/#/R-HSA-9707564;https://reactome.org/PathwayBrowser/#/R-HSA-9707587;https://reactome.org/PathwayBrowser/#/R-HSA-9707616;https://reactome.org/PathwayBrowser/#/R-HSA-9708530;https://reactome.org/PathwayBrowser/#/R-HSA-9711123;https://reactome.org/PathwayBrowser…	HEME METABOLISM	https://www.gsea-msigdb.org/gsea/msigdb/cards/HALLMARK_HEME_METABOLISM
O14908	10	K	1.38649	None	PDZ domain-containing protein GIPC1 OS=Homo sapiens OX=9606 GN=GIPC1 PE=1 SV=2	GIPC1	1	3.70333e-09	91.032	2	K(1)APPLVENEEAEPGR	-0.93457	85749	106090	0.845844	1.17276	nucleus	K20056			GO:0000902 cell morphogenesis; GO:0000904 cell morphogenesis involved in differentiation; GO:0001667 ameboidal-type cell migration; GO:0001736 establishment of planar polarity; GO:0001738 morphogenesis of a polarized epithelium; GO:0002009 morphogenesis of an epithelium; GO:0006605 protein targeting; GO:0006810 transport; GO:0006811 ion transport; GO:0006820 anion transport; GO:0006835 dicarboxyl…	GO:0005622 intracellular anatomical structure; GO:0005737 cytoplasm; GO:0005829 cytosol; GO:0005903 brush border; GO:0005938 cell cortex; GO:0008021 synaptic vesicle; GO:0012505 endomembrane system; GO:0012506 vesicle membrane; GO:0016020 membrane; GO:0030133 transport vesicle; GO:0030139 endocytic vesicle; GO:0030425 dendrite; GO:0031090 organelle membrane; GO:0031410 cytoplasmic vesicle; GO:003…	GO:0001965 G-protein alpha-subunit binding; GO:0003779 actin binding; GO:0005096 GTPase activator activity; GO:0005102 signaling receptor binding; GO:0005488 binding; GO:0005515 protein binding; GO:0008047 enzyme activator activity; GO:0008092 cytoskeletal protein binding; GO:0017022 myosin binding; GO:0019904 protein domain specific binding; GO:0030165 PDZ domain binding; GO:0030234 enzyme regul…	PF00595	PF00595 PDZ domain	TU	KOG3938	RGS-GAIP interacting protein GIPC, contains PDZ domain	WP3888 VEGFAVEGFR2 SIGNALING PATHWAY	http://www.wikipathways.org/instance/WP3888_r116782
O14929	15	K	1.10926	None	Histone acetyltransferase type B catalytic subunit OS=Homo sapiens OX=9606 GN=HAT1 PE=1 SV=2	HAT1	1	2.58683e-05	74.849	2	FLVEYK(1)SAVEK	-0.2237	94205	129660	0.94295	1.04598	cytoplasm	K11303	HAT1; histone acetyltransferase 1 [EC:2.3.1.48]	hsa04613 Neutrophil extracellular trap formation; hsa05034 Alcoholism	GO:0006323 DNA packaging; GO:0006325 chromatin organization; GO:0006333 chromatin assembly or disassembly; GO:0006334 nucleosome assembly; GO:0006335 DNA replication-dependent chromatin assembly; GO:0006336 DNA replication-independent chromatin assembly; GO:0006338 chromatin remodeling; GO:0006464 cellular protein modification process; GO:0006473 protein acetylation; GO:0006475 internal protein a…	GO:0000228 nuclear chromosome; GO:0000785 chromatin; GO:0005622 intracellular anatomical structure; GO:0005634 nucleus; GO:0005654 nucleoplasm; GO:0005694 chromosome; GO:0005737 cytoplasm; GO:0016363 nuclear matrix; GO:0031974 membrane-enclosed lumen; GO:0031981 nuclear lumen; GO:0032991 protein-containing complex; GO:0034399 nuclear periphery; GO:0043226 organelle; GO:0043227 membrane-bounded or…	GO:0003824 catalytic activity; GO:0004402 histone acetyltransferase activity; GO:0005488 binding; GO:0005515 protein binding; GO:0008080 N-acetyltransferase activity; GO:0010485 H4 histone acetyltransferase activity; GO:0016407 acetyltransferase activity; GO:0016410 N-acyltransferase activity; GO:0016740 transferase activity; GO:0016746 acyltransferase activity; GO:0016747 acyltransferase activit…	PF10394	PF10394 Histone acetyl transferase HAT1 N-terminus	B	KOG2696	Histone acetyltransferase type b catalytic subunit	WP3996 ETHANOL EFFECTS ON HISTONE MODIFICATIONS	http://www.wikipathways.org/instance/WP3996_r107156		R-HSA-3214847 HATs acetylate histones;R-HSA-3247509 Chromatin modifying enzymes;R-HSA-4839726 Chromatin organization	https://reactome.org/PathwayBrowser/#/R-HSA-3214847;https://reactome.org/PathwayBrowser/#/R-HSA-3247509;https://reactome.org/PathwayBrowser/#/R-HSA-4839726
P19105	150	K	1.21221	None	Myosin regulatory light chain 12A OS=Homo sapiens OX=9606 GN=MYL12A PE=1 SV=2	MYL12A	1	9.31117e-08	99.34	2	K(1)GNFNYIEFTR	2.35	13088	16425	0.902574	1.09411	mitochondria	K12757	MYL12; myosin regulatory light chain 12	hsa04510 Focal adhesion; hsa04360 Axon guidance; hsa04530 Tight junction; hsa05131 Shigellosis; hsa05132 Salmonella infection; hsa04810 Regulation of actin cytoskeleton; hsa04670 Leukocyte transendothelial migration; hsa04611 Platelet activation	GO:0003008 system process; GO:0003012 muscle system process; GO:0006936 muscle contraction; GO:0032501 multicellular organismal process;	GO:0005622 intracellular anatomical structure; GO:0005737 cytoplasm; GO:0005829 cytosol;		PF13405; PF08976	PF13405 EF-hand domain; PF08976 EF-hand domain	Z	KOG0031	Myosin regulatory light chain, EF-Hand protein superfamily	WP306 FOCAL ADHESION	http://www.wikipathways.org/instance/WP306_r116784		R-HSA-1266738 Developmental Biology;R-HSA-2682334 EPH-Ephrin signaling;R-HSA-3928664 Ephrin signaling;R-HSA-397014 Muscle contraction;R-HSA-422475 Axon guidance;R-HSA-445355 Smooth Muscle Contraction;R-HSA-9675108 Nervous system development	https://reactome.org/PathwayBrowser/#/R-HSA-1266738;https://reactome.org/PathwayBrowser/#/R-HSA-2682334;https://reactome.org/PathwayBrowser/#/R-HSA-3928664;https://reactome.org/PathwayBrowser/#/R-HSA-397014;https://reactome.org/PathwayBrowser/#/R-HSA-422475;https://reactome.org/PathwayBrowser/#/R-HSA-445355;https://reactome.org/PathwayBrowser/#/R-HSA-9675108	ANDROGEN RESPONSE	https://www.gsea-msigdb.org/gsea/msigdb/cards/HALLMARK_ANDROGEN_RESPONSE
O14965	143	K		None	Aurora kinase A OS=Homo sapiens OX=9606 GN=AURKA PE=1 SV=3	AURKA	1	0.0175651	53.878	2	GK(1)FGNVYLAR	-3.5629	0	23229		0.839916	cytoplasm	K11481	AURKA; aurora kinase A [EC:2.7.11.1]	hsa04914 Progesterone-mediated oocyte maturation; hsa04114 Oocyte meiosis	GO:0000003 reproduction; GO:0000022 mitotic spindle elongation; GO:0000070 mitotic sister chromatid segregation; GO:0000075 cell cycle checkpoint signaling; GO:0000077 DNA damage checkpoint signaling; GO:0000086 G2/M transition of mitotic cell cycle; GO:0000122 negative regulation of transcription by RNA polymerase II; GO:0000212 meiotic spindle organization; GO:0000226 microtubule cytoskeleton o…	GO:0000228 nuclear chromosome; GO:0000775 chromosome, centromeric region; GO:0000776 kinetochore; GO:0000779 condensed chromosome, centromeric region; GO:0000793 condensed chromosome; GO:0000794 condensed nuclear chromosome; GO:0000922 spindle pole; GO:0001674 female germ cell nucleus; GO:0005622 intracellular anatomical structure; GO:0005634 nucleus; GO:0005654 nucleoplasm; GO:0005694 chromosome…	GO:0003824 catalytic activity; GO:0004672 protein kinase activity; GO:0004674 protein serine/threonine kinase activity; GO:0004712 protein serine/threonine/tyrosine kinase activity; GO:0005488 binding; GO:0005515 protein binding; GO:0008092 cytoskeletal protein binding; GO:0016301 kinase activity; GO:0016740 transferase activity; GO:0016772 transferase activity, transferring phosphorus-containing…	PF00069	PF00069 Protein kinase domain	D	KOG0580	Serine/threonine protein kinase	WP437 EGFEGFR SIGNALING PATHWAY;WP2361 GASTRIC CANCER NETWORK 1	http://www.wikipathways.org/instance/WP437_r120689;http://www.wikipathways.org/instance/WP2361_r117731		R-HSA-1640170 Cell Cycle;R-HSA-174143 APC/C-mediated degradation of cell cycle proteins;R-HSA-174178 APC/C:Cdh1 mediated degradation of Cdc20 and other APC/C:Cdh1 targeted proteins in late mitosis/early G1;R-HSA-212436 Generic Transcription Pathway;R-HSA-2565942 Regulation of PLK1 Activity at G2/M Transition;R-HSA-2990846 SUMOylation;R-HSA-3108232 SUMO E3 ligases SUMOylate target proteins;R-HSA-3…	https://reactome.org/PathwayBrowser/#/R-HSA-1640170;https://reactome.org/PathwayBrowser/#/R-HSA-174143;https://reactome.org/PathwayBrowser/#/R-HSA-174178;https://reactome.org/PathwayBrowser/#/R-HSA-212436;https://reactome.org/PathwayBrowser/#/R-HSA-2565942;https://reactome.org/PathwayBrowser/#/R-HSA-2990846;https://reactome.org/PathwayBrowser/#/R-HSA-3108232;https://reactome.org/PathwayBrowser/#/…	E2F TARGETS;G2M CHECKPOINT;GLYCOLYSIS;MITOTIC SPINDLE;MTORC1 SIGNALING;SPERMATOGENESIS	https://www.gsea-msigdb.org/gsea/msigdb/cards/HALLMARK_E2F_TARGETS;https://www.gsea-msigdb.org/gsea/msigdb/cards/HALLMARK_G2M_CHECKPOINT;https://www.gsea-msigdb.org/gsea/msigdb/cards/HALLMARK_GLYCOLYSIS;https://www.gsea-msigdb.org/gsea/msigdb/cards/HALLMARK_MITOTIC_SPINDLE;https://www.gsea-msigdb.org/gsea/msigdb/cards/HALLMARK_MTORC1_SIGNALING;https://www.gsea-msigdb.org/gsea/msigdb/cards/HALLMAR…
O14974	329	K		None	Protein phosphatase 1 regulatory subunit 12A OS=Homo sapiens OX=9606 GN=PPP1R12A PE=1 SV=1	PPP1R12A	1	4.78653e-05	81.335	2	ETLIIEPEK(1)NASR	0.48699	0	15968		0.972433	nucleus	K06270	PPP1R12A; protein phosphatase 1 regulatory subunit 12A	hsa04510 Focal adhesion; hsa04270 Vascular smooth muscle contraction; hsa04921 Oxytocin signaling pathway; hsa04810 Regulation of actin cytoskeleton; hsa04024 cAMP signaling pathway; hsa05205 Proteoglycans in cancer; hsa04611 Platelet activation; hsa04022 cGMP-PKG signaling pathway	GO:0000226 microtubule cytoskeleton organization; GO:0000278 mitotic cell cycle; GO:0000902 cell morphogenesis; GO:0000904 cell morphogenesis involved in differentiation; GO:0001889 liver development; GO:0002009 morphogenesis of an epithelium; GO:0003002 regionalization; GO:0003401 axis elongation; GO:0006355 regulation of transcription, DNA-templated; GO:0006357 regulation of transcription by RN…	GO:0000775 chromosome, centromeric region; GO:0000776 kinetochore; GO:0005622 intracellular anatomical structure; GO:0005634 nucleus; GO:0005654 nucleoplasm; GO:0005694 chromosome; GO:0005737 cytoplasm; GO:0005813 centrosome; GO:0005815 microtubule organizing center; GO:0005829 cytosol; GO:0005856 cytoskeleton; GO:0008287 protein serine/threonine phosphatase complex; GO:0015629 actin cytoskeleton…	GO:0003824 catalytic activity; GO:0004721 phosphoprotein phosphatase activity; GO:0004857 enzyme inhibitor activity; GO:0005488 binding; GO:0005515 protein binding; GO:0016787 hydrolase activity; GO:0016788 hydrolase activity, acting on ester bonds; GO:0016791 phosphatase activity; GO:0019208 phosphatase regulator activity; GO:0019899 enzyme binding; GO:0019900 kinase binding; GO:0019901 protein …			OT	KOG0505	Myosin phosphatase, regulatory subunit	WP4861 ENDOPLASMIC RETICULUM STRESS RESPONSE IN CORONAVIRUS INFECTION;WP306 FOCAL ADHESION;WP4541 HIPPOMERLIN SIGNALING DYSREGULATION;WP51 REGULATION OF ACTIN CYTOSKELETON	http://www.wikipathways.org/instance/WP4861_r118973;http://www.wikipathways.org/instance/WP306_r116784;http://www.wikipathways.org/instance/WP4541_r116745;http://www.wikipathways.org/instance/WP51_r116716		R-HSA-162582 Signal Transduction;R-HSA-1640170 Cell Cycle;R-HSA-194315 Signaling by Rho GTPases;R-HSA-195258 RHO GTPase Effectors;R-HSA-2565942 Regulation of PLK1 Activity at G2/M Transition;R-HSA-453274 Mitotic G2-G2/M phases;R-HSA-5625740 RHO GTPases activate PKNs;R-HSA-5625900 RHO GTPases activate CIT;R-HSA-5627117 RHO GTPases Activate ROCKs;R-HSA-5627123 RHO GTPases activate PAKs;R-HSA-69275 …	https://reactome.org/PathwayBrowser/#/R-HSA-162582;https://reactome.org/PathwayBrowser/#/R-HSA-1640170;https://reactome.org/PathwayBrowser/#/R-HSA-194315;https://reactome.org/PathwayBrowser/#/R-HSA-195258;https://reactome.org/PathwayBrowser/#/R-HSA-2565942;https://reactome.org/PathwayBrowser/#/R-HSA-453274;https://reactome.org/PathwayBrowser/#/R-HSA-5625740;https://reactome.org/PathwayBrowser/#/R…
O14974	197	K		None	Protein phosphatase 1 regulatory subunit 12A OS=Homo sapiens OX=9606 GN=PPP1R12A PE=1 SV=1	PPP1R12A	1	5.44255e-05	82.437	2	HAK(1)SGGTALHVAAAK	-0.49097	0	17158		0.972433	nucleus	K06270	PPP1R12A; protein phosphatase 1 regulatory subunit 12A	hsa04510 Focal adhesion; hsa04270 Vascular smooth muscle contraction; hsa04921 Oxytocin signaling pathway; hsa04810 Regulation of actin cytoskeleton; hsa04024 cAMP signaling pathway; hsa05205 Proteoglycans in cancer; hsa04611 Platelet activation; hsa04022 cGMP-PKG signaling pathway	GO:0000226 microtubule cytoskeleton organization; GO:0000278 mitotic cell cycle; GO:0000902 cell morphogenesis; GO:0000904 cell morphogenesis involved in differentiation; GO:0001889 liver development; GO:0002009 morphogenesis of an epithelium; GO:0003002 regionalization; GO:0003401 axis elongation; GO:0006355 regulation of transcription, DNA-templated; GO:0006357 regulation of transcription by RN…	GO:0000775 chromosome, centromeric region; GO:0000776 kinetochore; GO:0005622 intracellular anatomical structure; GO:0005634 nucleus; GO:0005654 nucleoplasm; GO:0005694 chromosome; GO:0005737 cytoplasm; GO:0005813 centrosome; GO:0005815 microtubule organizing center; GO:0005829 cytosol; GO:0005856 cytoskeleton; GO:0008287 protein serine/threonine phosphatase complex; GO:0015629 actin cytoskeleton…	GO:0003824 catalytic activity; GO:0004721 phosphoprotein phosphatase activity; GO:0004857 enzyme inhibitor activity; GO:0005488 binding; GO:0005515 protein binding; GO:0016787 hydrolase activity; GO:0016788 hydrolase activity, acting on ester bonds; GO:0016791 phosphatase activity; GO:0019208 phosphatase regulator activity; GO:0019899 enzyme binding; GO:0019900 kinase binding; GO:0019901 protein …			OT	KOG0505	Myosin phosphatase, regulatory subunit	WP4861 ENDOPLASMIC RETICULUM STRESS RESPONSE IN CORONAVIRUS INFECTION;WP306 FOCAL ADHESION;WP4541 HIPPOMERLIN SIGNALING DYSREGULATION;WP51 REGULATION OF ACTIN CYTOSKELETON	http://www.wikipathways.org/instance/WP4861_r118973;http://www.wikipathways.org/instance/WP306_r116784;http://www.wikipathways.org/instance/WP4541_r116745;http://www.wikipathways.org/instance/WP51_r116716		R-HSA-162582 Signal Transduction;R-HSA-1640170 Cell Cycle;R-HSA-194315 Signaling by Rho GTPases;R-HSA-195258 RHO GTPase Effectors;R-HSA-2565942 Regulation of PLK1 Activity at G2/M Transition;R-HSA-453274 Mitotic G2-G2/M phases;R-HSA-5625740 RHO GTPases activate PKNs;R-HSA-5625900 RHO GTPases activate CIT;R-HSA-5627117 RHO GTPases Activate ROCKs;R-HSA-5627123 RHO GTPases activate PAKs;R-HSA-69275 …	https://reactome.org/PathwayBrowser/#/R-HSA-162582;https://reactome.org/PathwayBrowser/#/R-HSA-1640170;https://reactome.org/PathwayBrowser/#/R-HSA-194315;https://reactome.org/PathwayBrowser/#/R-HSA-195258;https://reactome.org/PathwayBrowser/#/R-HSA-2565942;https://reactome.org/PathwayBrowser/#/R-HSA-453274;https://reactome.org/PathwayBrowser/#/R-HSA-5625740;https://reactome.org/PathwayBrowser/#/R…
O14974	880	K	1.44142	None	Protein phosphatase 1 regulatory subunit 12A OS=Homo sapiens OX=9606 GN=PPP1R12A PE=1 SV=1	PPP1R12A	1	0.000222337	88.181	2	K(1)ETQTDSISR	-0.40666	14045	21426	0.815019	1.17478	nucleus	K06270	PPP1R12A; protein phosphatase 1 regulatory subunit 12A	hsa04510 Focal adhesion; hsa04270 Vascular smooth muscle contraction; hsa04921 Oxytocin signaling pathway; hsa04810 Regulation of actin cytoskeleton; hsa04024 cAMP signaling pathway; hsa05205 Proteoglycans in cancer; hsa04611 Platelet activation; hsa04022 cGMP-PKG signaling pathway	GO:0000226 microtubule cytoskeleton organization; GO:0000278 mitotic cell cycle; GO:0000902 cell morphogenesis; GO:0000904 cell morphogenesis involved in differentiation; GO:0001889 liver development; GO:0002009 morphogenesis of an epithelium; GO:0003002 regionalization; GO:0003401 axis elongation; GO:0006355 regulation of transcription, DNA-templated; GO:0006357 regulation of transcription by RN…	GO:0000775 chromosome, centromeric region; GO:0000776 kinetochore; GO:0005622 intracellular anatomical structure; GO:0005634 nucleus; GO:0005654 nucleoplasm; GO:0005694 chromosome; GO:0005737 cytoplasm; GO:0005813 centrosome; GO:0005815 microtubule organizing center; GO:0005829 cytosol; GO:0005856 cytoskeleton; GO:0008287 protein serine/threonine phosphatase complex; GO:0015629 actin cytoskeleton…	GO:0003824 catalytic activity; GO:0004721 phosphoprotein phosphatase activity; GO:0004857 enzyme inhibitor activity; GO:0005488 binding; GO:0005515 protein binding; GO:0016787 hydrolase activity; GO:0016788 hydrolase activity, acting on ester bonds; GO:0016791 phosphatase activity; GO:0019208 phosphatase regulator activity; GO:0019899 enzyme binding; GO:0019900 kinase binding; GO:0019901 protein …			OT	KOG0505	Myosin phosphatase, regulatory subunit	WP4861 ENDOPLASMIC RETICULUM STRESS RESPONSE IN CORONAVIRUS INFECTION;WP306 FOCAL ADHESION;WP4541 HIPPOMERLIN SIGNALING DYSREGULATION;WP51 REGULATION OF ACTIN CYTOSKELETON	http://www.wikipathways.org/instance/WP4861_r118973;http://www.wikipathways.org/instance/WP306_r116784;http://www.wikipathways.org/instance/WP4541_r116745;http://www.wikipathways.org/instance/WP51_r116716		R-HSA-162582 Signal Transduction;R-HSA-1640170 Cell Cycle;R-HSA-194315 Signaling by Rho GTPases;R-HSA-195258 RHO GTPase Effectors;R-HSA-2565942 Regulation of PLK1 Activity at G2/M Transition;R-HSA-453274 Mitotic G2-G2/M phases;R-HSA-5625740 RHO GTPases activate PKNs;R-HSA-5625900 RHO GTPases activate CIT;R-HSA-5627117 RHO GTPases Activate ROCKs;R-HSA-5627123 RHO GTPases activate PAKs;R-HSA-69275 …	https://reactome.org/PathwayBrowser/#/R-HSA-162582;https://reactome.org/PathwayBrowser/#/R-HSA-1640170;https://reactome.org/PathwayBrowser/#/R-HSA-194315;https://reactome.org/PathwayBrowser/#/R-HSA-195258;https://reactome.org/PathwayBrowser/#/R-HSA-2565942;https://reactome.org/PathwayBrowser/#/R-HSA-453274;https://reactome.org/PathwayBrowser/#/R-HSA-5625740;https://reactome.org/PathwayBrowser/#/R…
O14974	420	K	1.20069	None	Protein phosphatase 1 regulatory subunit 12A OS=Homo sapiens OX=9606 GN=PPP1R12A PE=1 SV=1	PPP1R12A	1	0.00243086	80.623	2	KFPTTATK(1)ISPK	1.4154	48650	61822	0.906463	1.08838	nucleus	K06270	PPP1R12A; protein phosphatase 1 regulatory subunit 12A	hsa04510 Focal adhesion; hsa04270 Vascular smooth muscle contraction; hsa04921 Oxytocin signaling pathway; hsa04810 Regulation of actin cytoskeleton; hsa04024 cAMP signaling pathway; hsa05205 Proteoglycans in cancer; hsa04611 Platelet activation; hsa04022 cGMP-PKG signaling pathway	GO:0000226 microtubule cytoskeleton organization; GO:0000278 mitotic cell cycle; GO:0000902 cell morphogenesis; GO:0000904 cell morphogenesis involved in differentiation; GO:0001889 liver development; GO:0002009 morphogenesis of an epithelium; GO:0003002 regionalization; GO:0003401 axis elongation; GO:0006355 regulation of transcription, DNA-templated; GO:0006357 regulation of transcription by RN…	GO:0000775 chromosome, centromeric region; GO:0000776 kinetochore; GO:0005622 intracellular anatomical structure; GO:0005634 nucleus; GO:0005654 nucleoplasm; GO:0005694 chromosome; GO:0005737 cytoplasm; GO:0005813 centrosome; GO:0005815 microtubule organizing center; GO:0005829 cytosol; GO:0005856 cytoskeleton; GO:0008287 protein serine/threonine phosphatase complex; GO:0015629 actin cytoskeleton…	GO:0003824 catalytic activity; GO:0004721 phosphoprotein phosphatase activity; GO:0004857 enzyme inhibitor activity; GO:0005488 binding; GO:0005515 protein binding; GO:0016787 hydrolase activity; GO:0016788 hydrolase activity, acting on ester bonds; GO:0016791 phosphatase activity; GO:0019208 phosphatase regulator activity; GO:0019899 enzyme binding; GO:0019900 kinase binding; GO:0019901 protein …			OT	KOG0505	Myosin phosphatase, regulatory subunit	WP4861 ENDOPLASMIC RETICULUM STRESS RESPONSE IN CORONAVIRUS INFECTION;WP306 FOCAL ADHESION;WP4541 HIPPOMERLIN SIGNALING DYSREGULATION;WP51 REGULATION OF ACTIN CYTOSKELETON	http://www.wikipathways.org/instance/WP4861_r118973;http://www.wikipathways.org/instance/WP306_r116784;http://www.wikipathways.org/instance/WP4541_r116745;http://www.wikipathways.org/instance/WP51_r116716		R-HSA-162582 Signal Transduction;R-HSA-1640170 Cell Cycle;R-HSA-194315 Signaling by Rho GTPases;R-HSA-195258 RHO GTPase Effectors;R-HSA-2565942 Regulation of PLK1 Activity at G2/M Transition;R-HSA-453274 Mitotic G2-G2/M phases;R-HSA-5625740 RHO GTPases activate PKNs;R-HSA-5625900 RHO GTPases activate CIT;R-HSA-5627117 RHO GTPases Activate ROCKs;R-HSA-5627123 RHO GTPases activate PAKs;R-HSA-69275 …	https://reactome.org/PathwayBrowser/#/R-HSA-162582;https://reactome.org/PathwayBrowser/#/R-HSA-1640170;https://reactome.org/PathwayBrowser/#/R-HSA-194315;https://reactome.org/PathwayBrowser/#/R-HSA-195258;https://reactome.org/PathwayBrowser/#/R-HSA-2565942;https://reactome.org/PathwayBrowser/#/R-HSA-453274;https://reactome.org/PathwayBrowser/#/R-HSA-5625740;https://reactome.org/PathwayBrowser/#/R…
O14974	539	K		None	Protein phosphatase 1 regulatory subunit 12A OS=Homo sapiens OX=9606 GN=PPP1R12A PE=1 SV=1	PPP1R12A	1	0.000143864	83.214	2	K(1)NSSVNEGSTYHK	0.60013	0	11329		0.972433	nucleus	K06270	PPP1R12A; protein phosphatase 1 regulatory subunit 12A	hsa04510 Focal adhesion; hsa04270 Vascular smooth muscle contraction; hsa04921 Oxytocin signaling pathway; hsa04810 Regulation of actin cytoskeleton; hsa04024 cAMP signaling pathway; hsa05205 Proteoglycans in cancer; hsa04611 Platelet activation; hsa04022 cGMP-PKG signaling pathway	GO:0000226 microtubule cytoskeleton organization; GO:0000278 mitotic cell cycle; GO:0000902 cell morphogenesis; GO:0000904 cell morphogenesis involved in differentiation; GO:0001889 liver development; GO:0002009 morphogenesis of an epithelium; GO:0003002 regionalization; GO:0003401 axis elongation; GO:0006355 regulation of transcription, DNA-templated; GO:0006357 regulation of transcription by RN…	GO:0000775 chromosome, centromeric region; GO:0000776 kinetochore; GO:0005622 intracellular anatomical structure; GO:0005634 nucleus; GO:0005654 nucleoplasm; GO:0005694 chromosome; GO:0005737 cytoplasm; GO:0005813 centrosome; GO:0005815 microtubule organizing center; GO:0005829 cytosol; GO:0005856 cytoskeleton; GO:0008287 protein serine/threonine phosphatase complex; GO:0015629 actin cytoskeleton…	GO:0003824 catalytic activity; GO:0004721 phosphoprotein phosphatase activity; GO:0004857 enzyme inhibitor activity; GO:0005488 binding; GO:0005515 protein binding; GO:0016787 hydrolase activity; GO:0016788 hydrolase activity, acting on ester bonds; GO:0016791 phosphatase activity; GO:0019208 phosphatase regulator activity; GO:0019899 enzyme binding; GO:0019900 kinase binding; GO:0019901 protein …			OT	KOG0505	Myosin phosphatase, regulatory subunit	WP4861 ENDOPLASMIC RETICULUM STRESS RESPONSE IN CORONAVIRUS INFECTION;WP306 FOCAL ADHESION;WP4541 HIPPOMERLIN SIGNALING DYSREGULATION;WP51 REGULATION OF ACTIN CYTOSKELETON	http://www.wikipathways.org/instance/WP4861_r118973;http://www.wikipathways.org/instance/WP306_r116784;http://www.wikipathways.org/instance/WP4541_r116745;http://www.wikipathways.org/instance/WP51_r116716		R-HSA-162582 Signal Transduction;R-HSA-1640170 Cell Cycle;R-HSA-194315 Signaling by Rho GTPases;R-HSA-195258 RHO GTPase Effectors;R-HSA-2565942 Regulation of PLK1 Activity at G2/M Transition;R-HSA-453274 Mitotic G2-G2/M phases;R-HSA-5625740 RHO GTPases activate PKNs;R-HSA-5625900 RHO GTPases activate CIT;R-HSA-5627117 RHO GTPases Activate ROCKs;R-HSA-5627123 RHO GTPases activate PAKs;R-HSA-69275 …	https://reactome.org/PathwayBrowser/#/R-HSA-162582;https://reactome.org/PathwayBrowser/#/R-HSA-1640170;https://reactome.org/PathwayBrowser/#/R-HSA-194315;https://reactome.org/PathwayBrowser/#/R-HSA-195258;https://reactome.org/PathwayBrowser/#/R-HSA-2565942;https://reactome.org/PathwayBrowser/#/R-HSA-453274;https://reactome.org/PathwayBrowser/#/R-HSA-5625740;https://reactome.org/PathwayBrowser/#/R…
O14974	551	K		None	Protein phosphatase 1 regulatory subunit 12A OS=Homo sapiens OX=9606 GN=PPP1R12A PE=1 SV=1	PPP1R12A	1	5.51516e-05	59.997	3	NSSVNEGSTYHK(1)SCSFGR	1.1038	42746	0	1.02918		nucleus	K06270	PPP1R12A; protein phosphatase 1 regulatory subunit 12A	hsa04510 Focal adhesion; hsa04270 Vascular smooth muscle contraction; hsa04921 Oxytocin signaling pathway; hsa04810 Regulation of actin cytoskeleton; hsa04024 cAMP signaling pathway; hsa05205 Proteoglycans in cancer; hsa04611 Platelet activation; hsa04022 cGMP-PKG signaling pathway	GO:0000226 microtubule cytoskeleton organization; GO:0000278 mitotic cell cycle; GO:0000902 cell morphogenesis; GO:0000904 cell morphogenesis involved in differentiation; GO:0001889 liver development; GO:0002009 morphogenesis of an epithelium; GO:0003002 regionalization; GO:0003401 axis elongation; GO:0006355 regulation of transcription, DNA-templated; GO:0006357 regulation of transcription by RN…	GO:0000775 chromosome, centromeric region; GO:0000776 kinetochore; GO:0005622 intracellular anatomical structure; GO:0005634 nucleus; GO:0005654 nucleoplasm; GO:0005694 chromosome; GO:0005737 cytoplasm; GO:0005813 centrosome; GO:0005815 microtubule organizing center; GO:0005829 cytosol; GO:0005856 cytoskeleton; GO:0008287 protein serine/threonine phosphatase complex; GO:0015629 actin cytoskeleton…	GO:0003824 catalytic activity; GO:0004721 phosphoprotein phosphatase activity; GO:0004857 enzyme inhibitor activity; GO:0005488 binding; GO:0005515 protein binding; GO:0016787 hydrolase activity; GO:0016788 hydrolase activity, acting on ester bonds; GO:0016791 phosphatase activity; GO:0019208 phosphatase regulator activity; GO:0019899 enzyme binding; GO:0019900 kinase binding; GO:0019901 protein …			OT	KOG0505	Myosin phosphatase, regulatory subunit	WP4861 ENDOPLASMIC RETICULUM STRESS RESPONSE IN CORONAVIRUS INFECTION;WP306 FOCAL ADHESION;WP4541 HIPPOMERLIN SIGNALING DYSREGULATION;WP51 REGULATION OF ACTIN CYTOSKELETON	http://www.wikipathways.org/instance/WP4861_r118973;http://www.wikipathways.org/instance/WP306_r116784;http://www.wikipathways.org/instance/WP4541_r116745;http://www.wikipathways.org/instance/WP51_r116716		R-HSA-162582 Signal Transduction;R-HSA-1640170 Cell Cycle;R-HSA-194315 Signaling by Rho GTPases;R-HSA-195258 RHO GTPase Effectors;R-HSA-2565942 Regulation of PLK1 Activity at G2/M Transition;R-HSA-453274 Mitotic G2-G2/M phases;R-HSA-5625740 RHO GTPases activate PKNs;R-HSA-5625900 RHO GTPases activate CIT;R-HSA-5627117 RHO GTPases Activate ROCKs;R-HSA-5627123 RHO GTPases activate PAKs;R-HSA-69275 …	https://reactome.org/PathwayBrowser/#/R-HSA-162582;https://reactome.org/PathwayBrowser/#/R-HSA-1640170;https://reactome.org/PathwayBrowser/#/R-HSA-194315;https://reactome.org/PathwayBrowser/#/R-HSA-195258;https://reactome.org/PathwayBrowser/#/R-HSA-2565942;https://reactome.org/PathwayBrowser/#/R-HSA-453274;https://reactome.org/PathwayBrowser/#/R-HSA-5625740;https://reactome.org/PathwayBrowser/#/R…
O14974	442	K	1.32539	None	Protein phosphatase 1 regulatory subunit 12A OS=Homo sapiens OX=9606 GN=PPP1R12A PE=1 SV=1	PPP1R12A	1	5.61343e-20	128.68	2	K(1)TGSYGALAEITASK	-1.1352	88064	123530	0.856672	1.13543	nucleus	K06270	PPP1R12A; protein phosphatase 1 regulatory subunit 12A	hsa04510 Focal adhesion; hsa04270 Vascular smooth muscle contraction; hsa04921 Oxytocin signaling pathway; hsa04810 Regulation of actin cytoskeleton; hsa04024 cAMP signaling pathway; hsa05205 Proteoglycans in cancer; hsa04611 Platelet activation; hsa04022 cGMP-PKG signaling pathway	GO:0000226 microtubule cytoskeleton organization; GO:0000278 mitotic cell cycle; GO:0000902 cell morphogenesis; GO:0000904 cell morphogenesis involved in differentiation; GO:0001889 liver development; GO:0002009 morphogenesis of an epithelium; GO:0003002 regionalization; GO:0003401 axis elongation; GO:0006355 regulation of transcription, DNA-templated; GO:0006357 regulation of transcription by RN…	GO:0000775 chromosome, centromeric region; GO:0000776 kinetochore; GO:0005622 intracellular anatomical structure; GO:0005634 nucleus; GO:0005654 nucleoplasm; GO:0005694 chromosome; GO:0005737 cytoplasm; GO:0005813 centrosome; GO:0005815 microtubule organizing center; GO:0005829 cytosol; GO:0005856 cytoskeleton; GO:0008287 protein serine/threonine phosphatase complex; GO:0015629 actin cytoskeleton…	GO:0003824 catalytic activity; GO:0004721 phosphoprotein phosphatase activity; GO:0004857 enzyme inhibitor activity; GO:0005488 binding; GO:0005515 protein binding; GO:0016787 hydrolase activity; GO:0016788 hydrolase activity, acting on ester bonds; GO:0016791 phosphatase activity; GO:0019208 phosphatase regulator activity; GO:0019899 enzyme binding; GO:0019900 kinase binding; GO:0019901 protein …			OT	KOG0505	Myosin phosphatase, regulatory subunit	WP4861 ENDOPLASMIC RETICULUM STRESS RESPONSE IN CORONAVIRUS INFECTION;WP306 FOCAL ADHESION;WP4541 HIPPOMERLIN SIGNALING DYSREGULATION;WP51 REGULATION OF ACTIN CYTOSKELETON	http://www.wikipathways.org/instance/WP4861_r118973;http://www.wikipathways.org/instance/WP306_r116784;http://www.wikipathways.org/instance/WP4541_r116745;http://www.wikipathways.org/instance/WP51_r116716		R-HSA-162582 Signal Transduction;R-HSA-1640170 Cell Cycle;R-HSA-194315 Signaling by Rho GTPases;R-HSA-195258 RHO GTPase Effectors;R-HSA-2565942 Regulation of PLK1 Activity at G2/M Transition;R-HSA-453274 Mitotic G2-G2/M phases;R-HSA-5625740 RHO GTPases activate PKNs;R-HSA-5625900 RHO GTPases activate CIT;R-HSA-5627117 RHO GTPases Activate ROCKs;R-HSA-5627123 RHO GTPases activate PAKs;R-HSA-69275 …	https://reactome.org/PathwayBrowser/#/R-HSA-162582;https://reactome.org/PathwayBrowser/#/R-HSA-1640170;https://reactome.org/PathwayBrowser/#/R-HSA-194315;https://reactome.org/PathwayBrowser/#/R-HSA-195258;https://reactome.org/PathwayBrowser/#/R-HSA-2565942;https://reactome.org/PathwayBrowser/#/R-HSA-453274;https://reactome.org/PathwayBrowser/#/R-HSA-5625740;https://reactome.org/PathwayBrowser/#/R…
O14974	532	K	1.57087	Up	Protein phosphatase 1 regulatory subunit 12A OS=Homo sapiens OX=9606 GN=PPP1R12A PE=1 SV=1	PPP1R12A	1	0.00584717	106.93	2	K(1)WEDDLK	-0.85771	23481	39038	0.773079	1.21441	nucleus	K06270	PPP1R12A; protein phosphatase 1 regulatory subunit 12A	hsa04510 Focal adhesion; hsa04270 Vascular smooth muscle contraction; hsa04921 Oxytocin signaling pathway; hsa04810 Regulation of actin cytoskeleton; hsa04024 cAMP signaling pathway; hsa05205 Proteoglycans in cancer; hsa04611 Platelet activation; hsa04022 cGMP-PKG signaling pathway	GO:0000226 microtubule cytoskeleton organization; GO:0000278 mitotic cell cycle; GO:0000902 cell morphogenesis; GO:0000904 cell morphogenesis involved in differentiation; GO:0001889 liver development; GO:0002009 morphogenesis of an epithelium; GO:0003002 regionalization; GO:0003401 axis elongation; GO:0006355 regulation of transcription, DNA-templated; GO:0006357 regulation of transcription by RN…	GO:0000775 chromosome, centromeric region; GO:0000776 kinetochore; GO:0005622 intracellular anatomical structure; GO:0005634 nucleus; GO:0005654 nucleoplasm; GO:0005694 chromosome; GO:0005737 cytoplasm; GO:0005813 centrosome; GO:0005815 microtubule organizing center; GO:0005829 cytosol; GO:0005856 cytoskeleton; GO:0008287 protein serine/threonine phosphatase complex; GO:0015629 actin cytoskeleton…	GO:0003824 catalytic activity; GO:0004721 phosphoprotein phosphatase activity; GO:0004857 enzyme inhibitor activity; GO:0005488 binding; GO:0005515 protein binding; GO:0016787 hydrolase activity; GO:0016788 hydrolase activity, acting on ester bonds; GO:0016791 phosphatase activity; GO:0019208 phosphatase regulator activity; GO:0019899 enzyme binding; GO:0019900 kinase binding; GO:0019901 protein …			OT	KOG0505	Myosin phosphatase, regulatory subunit	WP4861 ENDOPLASMIC RETICULUM STRESS RESPONSE IN CORONAVIRUS INFECTION;WP306 FOCAL ADHESION;WP4541 HIPPOMERLIN SIGNALING DYSREGULATION;WP51 REGULATION OF ACTIN CYTOSKELETON	http://www.wikipathways.org/instance/WP4861_r118973;http://www.wikipathways.org/instance/WP306_r116784;http://www.wikipathways.org/instance/WP4541_r116745;http://www.wikipathways.org/instance/WP51_r116716		R-HSA-162582 Signal Transduction;R-HSA-1640170 Cell Cycle;R-HSA-194315 Signaling by Rho GTPases;R-HSA-195258 RHO GTPase Effectors;R-HSA-2565942 Regulation of PLK1 Activity at G2/M Transition;R-HSA-453274 Mitotic G2-G2/M phases;R-HSA-5625740 RHO GTPases activate PKNs;R-HSA-5625900 RHO GTPases activate CIT;R-HSA-5627117 RHO GTPases Activate ROCKs;R-HSA-5627123 RHO GTPases activate PAKs;R-HSA-69275 …	https://reactome.org/PathwayBrowser/#/R-HSA-162582;https://reactome.org/PathwayBrowser/#/R-HSA-1640170;https://reactome.org/PathwayBrowser/#/R-HSA-194315;https://reactome.org/PathwayBrowser/#/R-HSA-195258;https://reactome.org/PathwayBrowser/#/R-HSA-2565942;https://reactome.org/PathwayBrowser/#/R-HSA-453274;https://reactome.org/PathwayBrowser/#/R-HSA-5625740;https://reactome.org/PathwayBrowser/#/R…
O14974	926	K	1.47342	None	Protein phosphatase 1 regulatory subunit 12A OS=Homo sapiens OX=9606 GN=PPP1R12A PE=1 SV=1	PPP1R12A	1	0.00230713	60.547	2	LEK(1)DDSTDFK	0.64208	18788	29298	0.804232	1.18497	nucleus	K06270	PPP1R12A; protein phosphatase 1 regulatory subunit 12A	hsa04510 Focal adhesion; hsa04270 Vascular smooth muscle contraction; hsa04921 Oxytocin signaling pathway; hsa04810 Regulation of actin cytoskeleton; hsa04024 cAMP signaling pathway; hsa05205 Proteoglycans in cancer; hsa04611 Platelet activation; hsa04022 cGMP-PKG signaling pathway	GO:0000226 microtubule cytoskeleton organization; GO:0000278 mitotic cell cycle; GO:0000902 cell morphogenesis; GO:0000904 cell morphogenesis involved in differentiation; GO:0001889 liver development; GO:0002009 morphogenesis of an epithelium; GO:0003002 regionalization; GO:0003401 axis elongation; GO:0006355 regulation of transcription, DNA-templated; GO:0006357 regulation of transcription by RN…	GO:0000775 chromosome, centromeric region; GO:0000776 kinetochore; GO:0005622 intracellular anatomical structure; GO:0005634 nucleus; GO:0005654 nucleoplasm; GO:0005694 chromosome; GO:0005737 cytoplasm; GO:0005813 centrosome; GO:0005815 microtubule organizing center; GO:0005829 cytosol; GO:0005856 cytoskeleton; GO:0008287 protein serine/threonine phosphatase complex; GO:0015629 actin cytoskeleton…	GO:0003824 catalytic activity; GO:0004721 phosphoprotein phosphatase activity; GO:0004857 enzyme inhibitor activity; GO:0005488 binding; GO:0005515 protein binding; GO:0016787 hydrolase activity; GO:0016788 hydrolase activity, acting on ester bonds; GO:0016791 phosphatase activity; GO:0019208 phosphatase regulator activity; GO:0019899 enzyme binding; GO:0019900 kinase binding; GO:0019901 protein …			OT	KOG0505	Myosin phosphatase, regulatory subunit	WP4861 ENDOPLASMIC RETICULUM STRESS RESPONSE IN CORONAVIRUS INFECTION;WP306 FOCAL ADHESION;WP4541 HIPPOMERLIN SIGNALING DYSREGULATION;WP51 REGULATION OF ACTIN CYTOSKELETON	http://www.wikipathways.org/instance/WP4861_r118973;http://www.wikipathways.org/instance/WP306_r116784;http://www.wikipathways.org/instance/WP4541_r116745;http://www.wikipathways.org/instance/WP51_r116716		R-HSA-162582 Signal Transduction;R-HSA-1640170 Cell Cycle;R-HSA-194315 Signaling by Rho GTPases;R-HSA-195258 RHO GTPase Effectors;R-HSA-2565942 Regulation of PLK1 Activity at G2/M Transition;R-HSA-453274 Mitotic G2-G2/M phases;R-HSA-5625740 RHO GTPases activate PKNs;R-HSA-5625900 RHO GTPases activate CIT;R-HSA-5627117 RHO GTPases Activate ROCKs;R-HSA-5627123 RHO GTPases activate PAKs;R-HSA-69275 …	https://reactome.org/PathwayBrowser/#/R-HSA-162582;https://reactome.org/PathwayBrowser/#/R-HSA-1640170;https://reactome.org/PathwayBrowser/#/R-HSA-194315;https://reactome.org/PathwayBrowser/#/R-HSA-195258;https://reactome.org/PathwayBrowser/#/R-HSA-2565942;https://reactome.org/PathwayBrowser/#/R-HSA-453274;https://reactome.org/PathwayBrowser/#/R-HSA-5625740;https://reactome.org/PathwayBrowser/#/R…
O14974	320	K	1.45222	None	Protein phosphatase 1 regulatory subunit 12A OS=Homo sapiens OX=9606 GN=PPP1R12A PE=1 SV=1	PPP1R12A	1	7.04047e-08	112.93	2	NK(1)ETLIIEPEK	-0.1671	76957	118280	0.811345	1.17825	nucleus	K06270	PPP1R12A; protein phosphatase 1 regulatory subunit 12A	hsa04510 Focal adhesion; hsa04270 Vascular smooth muscle contraction; hsa04921 Oxytocin signaling pathway; hsa04810 Regulation of actin cytoskeleton; hsa04024 cAMP signaling pathway; hsa05205 Proteoglycans in cancer; hsa04611 Platelet activation; hsa04022 cGMP-PKG signaling pathway	GO:0000226 microtubule cytoskeleton organization; GO:0000278 mitotic cell cycle; GO:0000902 cell morphogenesis; GO:0000904 cell morphogenesis involved in differentiation; GO:0001889 liver development; GO:0002009 morphogenesis of an epithelium; GO:0003002 regionalization; GO:0003401 axis elongation; GO:0006355 regulation of transcription, DNA-templated; GO:0006357 regulation of transcription by RN…	GO:0000775 chromosome, centromeric region; GO:0000776 kinetochore; GO:0005622 intracellular anatomical structure; GO:0005634 nucleus; GO:0005654 nucleoplasm; GO:0005694 chromosome; GO:0005737 cytoplasm; GO:0005813 centrosome; GO:0005815 microtubule organizing center; GO:0005829 cytosol; GO:0005856 cytoskeleton; GO:0008287 protein serine/threonine phosphatase complex; GO:0015629 actin cytoskeleton…	GO:0003824 catalytic activity; GO:0004721 phosphoprotein phosphatase activity; GO:0004857 enzyme inhibitor activity; GO:0005488 binding; GO:0005515 protein binding; GO:0016787 hydrolase activity; GO:0016788 hydrolase activity, acting on ester bonds; GO:0016791 phosphatase activity; GO:0019208 phosphatase regulator activity; GO:0019899 enzyme binding; GO:0019900 kinase binding; GO:0019901 protein …			OT	KOG0505	Myosin phosphatase, regulatory subunit	WP4861 ENDOPLASMIC RETICULUM STRESS RESPONSE IN CORONAVIRUS INFECTION;WP306 FOCAL ADHESION;WP4541 HIPPOMERLIN SIGNALING DYSREGULATION;WP51 REGULATION OF ACTIN CYTOSKELETON	http://www.wikipathways.org/instance/WP4861_r118973;http://www.wikipathways.org/instance/WP306_r116784;http://www.wikipathways.org/instance/WP4541_r116745;http://www.wikipathways.org/instance/WP51_r116716		R-HSA-162582 Signal Transduction;R-HSA-1640170 Cell Cycle;R-HSA-194315 Signaling by Rho GTPases;R-HSA-195258 RHO GTPase Effectors;R-HSA-2565942 Regulation of PLK1 Activity at G2/M Transition;R-HSA-453274 Mitotic G2-G2/M phases;R-HSA-5625740 RHO GTPases activate PKNs;R-HSA-5625900 RHO GTPases activate CIT;R-HSA-5627117 RHO GTPases Activate ROCKs;R-HSA-5627123 RHO GTPases activate PAKs;R-HSA-69275 …	https://reactome.org/PathwayBrowser/#/R-HSA-162582;https://reactome.org/PathwayBrowser/#/R-HSA-1640170;https://reactome.org/PathwayBrowser/#/R-HSA-194315;https://reactome.org/PathwayBrowser/#/R-HSA-195258;https://reactome.org/PathwayBrowser/#/R-HSA-2565942;https://reactome.org/PathwayBrowser/#/R-HSA-453274;https://reactome.org/PathwayBrowser/#/R-HSA-5625740;https://reactome.org/PathwayBrowser/#/R…
O14974	709	K	1.33216	None	Protein phosphatase 1 regulatory subunit 12A OS=Homo sapiens OX=9606 GN=PPP1R12A PE=1 SV=1	PPP1R12A	1	3.1783e-07	70.552	2	STQGVTLTDLQEAEK(1)TIGR	-2.4158	19705	27782	0.854125	1.13783	nucleus	K06270	PPP1R12A; protein phosphatase 1 regulatory subunit 12A	hsa04510 Focal adhesion; hsa04270 Vascular smooth muscle contraction; hsa04921 Oxytocin signaling pathway; hsa04810 Regulation of actin cytoskeleton; hsa04024 cAMP signaling pathway; hsa05205 Proteoglycans in cancer; hsa04611 Platelet activation; hsa04022 cGMP-PKG signaling pathway	GO:0000226 microtubule cytoskeleton organization; GO:0000278 mitotic cell cycle; GO:0000902 cell morphogenesis; GO:0000904 cell morphogenesis involved in differentiation; GO:0001889 liver development; GO:0002009 morphogenesis of an epithelium; GO:0003002 regionalization; GO:0003401 axis elongation; GO:0006355 regulation of transcription, DNA-templated; GO:0006357 regulation of transcription by RN…	GO:0000775 chromosome, centromeric region; GO:0000776 kinetochore; GO:0005622 intracellular anatomical structure; GO:0005634 nucleus; GO:0005654 nucleoplasm; GO:0005694 chromosome; GO:0005737 cytoplasm; GO:0005813 centrosome; GO:0005815 microtubule organizing center; GO:0005829 cytosol; GO:0005856 cytoskeleton; GO:0008287 protein serine/threonine phosphatase complex; GO:0015629 actin cytoskeleton…	GO:0003824 catalytic activity; GO:0004721 phosphoprotein phosphatase activity; GO:0004857 enzyme inhibitor activity; GO:0005488 binding; GO:0005515 protein binding; GO:0016787 hydrolase activity; GO:0016788 hydrolase activity, acting on ester bonds; GO:0016791 phosphatase activity; GO:0019208 phosphatase regulator activity; GO:0019899 enzyme binding; GO:0019900 kinase binding; GO:0019901 protein …			OT	KOG0505	Myosin phosphatase, regulatory subunit	WP4861 ENDOPLASMIC RETICULUM STRESS RESPONSE IN CORONAVIRUS INFECTION;WP306 FOCAL ADHESION;WP4541 HIPPOMERLIN SIGNALING DYSREGULATION;WP51 REGULATION OF ACTIN CYTOSKELETON	http://www.wikipathways.org/instance/WP4861_r118973;http://www.wikipathways.org/instance/WP306_r116784;http://www.wikipathways.org/instance/WP4541_r116745;http://www.wikipathways.org/instance/WP51_r116716		R-HSA-162582 Signal Transduction;R-HSA-1640170 Cell Cycle;R-HSA-194315 Signaling by Rho GTPases;R-HSA-195258 RHO GTPase Effectors;R-HSA-2565942 Regulation of PLK1 Activity at G2/M Transition;R-HSA-453274 Mitotic G2-G2/M phases;R-HSA-5625740 RHO GTPases activate PKNs;R-HSA-5625900 RHO GTPases activate CIT;R-HSA-5627117 RHO GTPases Activate ROCKs;R-HSA-5627123 RHO GTPases activate PAKs;R-HSA-69275 …	https://reactome.org/PathwayBrowser/#/R-HSA-162582;https://reactome.org/PathwayBrowser/#/R-HSA-1640170;https://reactome.org/PathwayBrowser/#/R-HSA-194315;https://reactome.org/PathwayBrowser/#/R-HSA-195258;https://reactome.org/PathwayBrowser/#/R-HSA-2565942;https://reactome.org/PathwayBrowser/#/R-HSA-453274;https://reactome.org/PathwayBrowser/#/R-HSA-5625740;https://reactome.org/PathwayBrowser/#/R…
O14975	572	K		None	Long-chain fatty acid transport protein 2 OS=Homo sapiens OX=9606 GN=SLC27A2 PE=1 SV=2	SLC27A2	1	5.12597e-14	151.52	2	IQDTIEITGTFK(1)HR	-1.1851	32635	46004			endoplasmic reticulum	K08746	SLC27A2; solute carrier family 27 (fatty acid transporter), member 2 [EC:6.2.1.- 6.2.1.3]	hsa03320 PPAR signaling pathway; hsa04146 Peroxisome; hsa04931 Insulin resistance	GO:0000038 very long-chain fatty acid metabolic process; GO:0001561 fatty acid alpha-oxidation; GO:0001676 long-chain fatty acid metabolic process; GO:0001775 cell activation; GO:0002252 immune effector process; GO:0002263 cell activation involved in immune response; GO:0002274 myeloid leukocyte activation; GO:0002275 myeloid cell activation involved in immune response; GO:0002283 neutrophil acti…	GO:0005622 intracellular anatomical structure; GO:0005737 cytoplasm; GO:0005777 peroxisome; GO:0005778 peroxisomal membrane; GO:0005779 integral component of peroxisomal membrane; GO:0005783 endoplasmic reticulum; GO:0005788 endoplasmic reticulum lumen; GO:0005789 endoplasmic reticulum membrane; GO:0005829 cytosol; GO:0005886 plasma membrane; GO:0012505 endomembrane system; GO:0012506 vesicle mem…	GO:0003824 catalytic activity; GO:0004467 long-chain fatty acid-CoA ligase activity; GO:0005102 signaling receptor binding; GO:0005215 transporter activity; GO:0005319 lipid transporter activity; GO:0005342 organic acid transmembrane transporter activity; GO:0005488 binding; GO:0005515 protein binding; GO:0008028 monocarboxylic acid transmembrane transporter activity; GO:0008509 anion transmembra…	PF13193	PF13193 AMP-binding enzyme C-terminal domain	I	KOG1179	Very long-chain acyl-CoA synthetase/fatty acid transporter	WP5064 7OXOC AND 7BETAHC PATHWAYS;WP4545 OXYSTEROLS DERIVED FROM CHOLESTEROL;WP3942 PPAR SIGNALING PATHWAY	http://www.wikipathways.org/instance/WP5064_r120384;http://www.wikipathways.org/instance/WP4545_r120411;http://www.wikipathways.org/instance/WP3942_r106517		R-HSA-1430728 Metabolism;R-HSA-168249 Innate Immune System;R-HSA-168256 Immune System;R-HSA-192105 Synthesis of bile acids and bile salts;R-HSA-193368 Synthesis of bile acids and bile salts via 7alpha-hydroxycholesterol;R-HSA-193775 Synthesis of bile acids and bile salts via 24-hydroxycholesterol;R-HSA-194068 Bile acid and bile salt metabolism;R-HSA-389599 Alpha-oxidation of phytanate;R-HSA-39091…	https://reactome.org/PathwayBrowser/#/R-HSA-1430728;https://reactome.org/PathwayBrowser/#/R-HSA-168249;https://reactome.org/PathwayBrowser/#/R-HSA-168256;https://reactome.org/PathwayBrowser/#/R-HSA-192105;https://reactome.org/PathwayBrowser/#/R-HSA-193368;https://reactome.org/PathwayBrowser/#/R-HSA-193775;https://reactome.org/PathwayBrowser/#/R-HSA-194068;https://reactome.org/PathwayBrowser/#/R-H…	BILE ACID METABOLISM;ESTROGEN RESPONSE EARLY;ESTROGEN RESPONSE LATE;PEROXISOME	https://www.gsea-msigdb.org/gsea/msigdb/cards/HALLMARK_BILE_ACID_METABOLISM;https://www.gsea-msigdb.org/gsea/msigdb/cards/HALLMARK_ESTROGEN_RESPONSE_EARLY;https://www.gsea-msigdb.org/gsea/msigdb/cards/HALLMARK_ESTROGEN_RESPONSE_LATE;https://www.gsea-msigdb.org/gsea/msigdb/cards/HALLMARK_PEROXISOME
O14976	590	K		None	Cyclin-G-associated kinase OS=Homo sapiens OX=9606 GN=GAK PE=1 SV=2	GAK	1	3.98585e-06	71.896	2	AVVMTPVPLFSK(1)QR	-2.4759	0	11518		0.942766	plasma membrane	K08855			GO:0000003 reproduction; GO:0001654 eye development; GO:0001745 compound eye morphogenesis; GO:0001889 liver development; GO:0003006 developmental process involved in reproduction; GO:0006457 protein folding; GO:0006458 'de novo' protein folding; GO:0006464 cellular protein modification process; GO:0006468 protein phosphorylation; GO:0006793 phosphorus metabolic process; GO:0006796 phosphate-cont…	GO:0005622 intracellular anatomical structure; GO:0005737 cytoplasm; GO:0005794 Golgi apparatus; GO:0005795 Golgi stack; GO:0005829 cytosol; GO:0012505 endomembrane system; GO:0031982 vesicle; GO:0031984 organelle subcompartment; GO:0043226 organelle; GO:0043227 membrane-bounded organelle; GO:0043229 intracellular organelle; GO:0043231 intracellular membrane-bounded organelle; GO:0098791 Golgi ap…	GO:0003824 catalytic activity; GO:0004672 protein kinase activity; GO:0004674 protein serine/threonine kinase activity; GO:0005488 binding; GO:0005515 protein binding; GO:0016301 kinase activity; GO:0016740 transferase activity; GO:0016772 transferase activity, transferring phosphorus-containing groups; GO:0016773 phosphotransferase activity, alcohol group as acceptor; GO:0030332 cyclin binding; …	PF00069; PF10409	PF00069 Protein kinase domain; PF10409 C2 domain of PTEN tumour-suppressor protein	TR	KOG2283	Clathrin coat dissociation kinase GAK/PTEN/Auxilin and related tyrosine phosphatases				R-HSA-199991 Membrane Trafficking;R-HSA-199992 trans-Golgi Network Vesicle Budding;R-HSA-432722 Golgi Associated Vesicle Biogenesis;R-HSA-5653656 Vesicle-mediated transport;R-HSA-8856828 Clathrin-mediated endocytosis	https://reactome.org/PathwayBrowser/#/R-HSA-199991;https://reactome.org/PathwayBrowser/#/R-HSA-199992;https://reactome.org/PathwayBrowser/#/R-HSA-432722;https://reactome.org/PathwayBrowser/#/R-HSA-5653656;https://reactome.org/PathwayBrowser/#/R-HSA-8856828
O14976	390	K	1.70892	Up	Cyclin-G-associated kinase OS=Homo sapiens OX=9606 GN=GAK PE=1 SV=2	GAK	1	0.0015573	68.49	2	LFTNLK(1)DTSSK	-1.0333	14192	27388	0.726756	1.24197	plasma membrane	K08855			GO:0000003 reproduction; GO:0001654 eye development; GO:0001745 compound eye morphogenesis; GO:0001889 liver development; GO:0003006 developmental process involved in reproduction; GO:0006457 protein folding; GO:0006458 'de novo' protein folding; GO:0006464 cellular protein modification process; GO:0006468 protein phosphorylation; GO:0006793 phosphorus metabolic process; GO:0006796 phosphate-cont…	GO:0005622 intracellular anatomical structure; GO:0005737 cytoplasm; GO:0005794 Golgi apparatus; GO:0005795 Golgi stack; GO:0005829 cytosol; GO:0012505 endomembrane system; GO:0031982 vesicle; GO:0031984 organelle subcompartment; GO:0043226 organelle; GO:0043227 membrane-bounded organelle; GO:0043229 intracellular organelle; GO:0043231 intracellular membrane-bounded organelle; GO:0098791 Golgi ap…	GO:0003824 catalytic activity; GO:0004672 protein kinase activity; GO:0004674 protein serine/threonine kinase activity; GO:0005488 binding; GO:0005515 protein binding; GO:0016301 kinase activity; GO:0016740 transferase activity; GO:0016772 transferase activity, transferring phosphorus-containing groups; GO:0016773 phosphotransferase activity, alcohol group as acceptor; GO:0030332 cyclin binding; …	PF00069; PF10409	PF00069 Protein kinase domain; PF10409 C2 domain of PTEN tumour-suppressor protein	TR	KOG2283	Clathrin coat dissociation kinase GAK/PTEN/Auxilin and related tyrosine phosphatases				R-HSA-199991 Membrane Trafficking;R-HSA-199992 trans-Golgi Network Vesicle Budding;R-HSA-432722 Golgi Associated Vesicle Biogenesis;R-HSA-5653656 Vesicle-mediated transport;R-HSA-8856828 Clathrin-mediated endocytosis	https://reactome.org/PathwayBrowser/#/R-HSA-199991;https://reactome.org/PathwayBrowser/#/R-HSA-199992;https://reactome.org/PathwayBrowser/#/R-HSA-432722;https://reactome.org/PathwayBrowser/#/R-HSA-5653656;https://reactome.org/PathwayBrowser/#/R-HSA-8856828
O14976	658	K	1.25852	None	Cyclin-G-associated kinase OS=Homo sapiens OX=9606 GN=GAK PE=1 SV=2	GAK	1	0.00632663	56.378	2	LQAK(1)MASMK	-0.1099	11892	16901	0.879423	1.10678	plasma membrane	K08855			GO:0000003 reproduction; GO:0001654 eye development; GO:0001745 compound eye morphogenesis; GO:0001889 liver development; GO:0003006 developmental process involved in reproduction; GO:0006457 protein folding; GO:0006458 'de novo' protein folding; GO:0006464 cellular protein modification process; GO:0006468 protein phosphorylation; GO:0006793 phosphorus metabolic process; GO:0006796 phosphate-cont…	GO:0005622 intracellular anatomical structure; GO:0005737 cytoplasm; GO:0005794 Golgi apparatus; GO:0005795 Golgi stack; GO:0005829 cytosol; GO:0012505 endomembrane system; GO:0031982 vesicle; GO:0031984 organelle subcompartment; GO:0043226 organelle; GO:0043227 membrane-bounded organelle; GO:0043229 intracellular organelle; GO:0043231 intracellular membrane-bounded organelle; GO:0098791 Golgi ap…	GO:0003824 catalytic activity; GO:0004672 protein kinase activity; GO:0004674 protein serine/threonine kinase activity; GO:0005488 binding; GO:0005515 protein binding; GO:0016301 kinase activity; GO:0016740 transferase activity; GO:0016772 transferase activity, transferring phosphorus-containing groups; GO:0016773 phosphotransferase activity, alcohol group as acceptor; GO:0030332 cyclin binding; …	PF00069; PF10409	PF00069 Protein kinase domain; PF10409 C2 domain of PTEN tumour-suppressor protein	TR	KOG2283	Clathrin coat dissociation kinase GAK/PTEN/Auxilin and related tyrosine phosphatases				R-HSA-199991 Membrane Trafficking;R-HSA-199992 trans-Golgi Network Vesicle Budding;R-HSA-432722 Golgi Associated Vesicle Biogenesis;R-HSA-5653656 Vesicle-mediated transport;R-HSA-8856828 Clathrin-mediated endocytosis	https://reactome.org/PathwayBrowser/#/R-HSA-199991;https://reactome.org/PathwayBrowser/#/R-HSA-199992;https://reactome.org/PathwayBrowser/#/R-HSA-432722;https://reactome.org/PathwayBrowser/#/R-HSA-5653656;https://reactome.org/PathwayBrowser/#/R-HSA-8856828
O14979	91	K	1.53315	Up	Heterogeneous nuclear ribonucleoprotein D-like OS=Homo sapiens OX=9606 GN=HNRNPDL PE=1 SV=3	HNRNPDL	1	0.00165659	67.507	2	HFK(1)SSSIQR	-0.10295	33054	46625	0.796511	1.22117	nucleus	K13044			GO:0006139 nucleobase-containing compound metabolic process; GO:0006396 RNA processing; GO:0006725 cellular aromatic compound metabolic process; GO:0006807 nitrogen compound metabolic process; GO:0007154 cell communication; GO:0007165 signal transduction; GO:0007166 cell surface receptor signaling pathway; GO:0008152 metabolic process; GO:0009987 cellular process; GO:0010033 response to organic s…	GO:0005622 intracellular anatomical structure; GO:0005634 nucleus; GO:0005654 nucleoplasm; GO:0005681 spliceosomal complex; GO:0005737 cytoplasm; GO:0005829 cytosol; GO:0031974 membrane-enclosed lumen; GO:0031981 nuclear lumen; GO:0032991 protein-containing complex; GO:0043226 organelle; GO:0043227 membrane-bounded organelle; GO:0043229 intracellular organelle; GO:0043231 intracellular membrane-b…	GO:0003676 nucleic acid binding; GO:0003677 DNA binding; GO:0003690 double-stranded DNA binding; GO:0003697 single-stranded DNA binding; GO:0003723 RNA binding; GO:0003727 single-stranded RNA binding; GO:0005488 binding; GO:0008143 poly(A) binding; GO:0034046 poly(G) binding; GO:0070717 poly-purine tract binding; GO:0097159 organic cyclic compound binding; GO:1901363 heterocyclic compound binding;	PF00076	PF00076 RNA recognition motif. (a.k.a. RRM, RBD, or RNP domain)	R	KOG0118	FOG: RRM domain				R-HSA-1280215 Cytokine Signaling in Immune system;R-HSA-168256 Immune System;R-HSA-447115 Interleukin-12 family signaling;R-HSA-449147 Signaling by Interleukins;R-HSA-8950505 Gene and protein expression by JAK-STAT signaling after Interleukin-12 stimulation;R-HSA-9020591 Interleukin-12 signaling	https://reactome.org/PathwayBrowser/#/R-HSA-1280215;https://reactome.org/PathwayBrowser/#/R-HSA-168256;https://reactome.org/PathwayBrowser/#/R-HSA-447115;https://reactome.org/PathwayBrowser/#/R-HSA-449147;https://reactome.org/PathwayBrowser/#/R-HSA-8950505;https://reactome.org/PathwayBrowser/#/R-HSA-9020591
O14979	142	K	1.25956	None	Heterogeneous nuclear ribonucleoprotein D-like OS=Homo sapiens OX=9606 GN=HNRNPDL PE=1 SV=3	HNRNPDL	1	6.32983e-08	94.791	2	INASK(1)NQQDDGK	0.30489	26975	31260	0.889383	1.12023	nucleus	K13044			GO:0006139 nucleobase-containing compound metabolic process; GO:0006396 RNA processing; GO:0006725 cellular aromatic compound metabolic process; GO:0006807 nitrogen compound metabolic process; GO:0007154 cell communication; GO:0007165 signal transduction; GO:0007166 cell surface receptor signaling pathway; GO:0008152 metabolic process; GO:0009987 cellular process; GO:0010033 response to organic s…	GO:0005622 intracellular anatomical structure; GO:0005634 nucleus; GO:0005654 nucleoplasm; GO:0005681 spliceosomal complex; GO:0005737 cytoplasm; GO:0005829 cytosol; GO:0031974 membrane-enclosed lumen; GO:0031981 nuclear lumen; GO:0032991 protein-containing complex; GO:0043226 organelle; GO:0043227 membrane-bounded organelle; GO:0043229 intracellular organelle; GO:0043231 intracellular membrane-b…	GO:0003676 nucleic acid binding; GO:0003677 DNA binding; GO:0003690 double-stranded DNA binding; GO:0003697 single-stranded DNA binding; GO:0003723 RNA binding; GO:0003727 single-stranded RNA binding; GO:0005488 binding; GO:0008143 poly(A) binding; GO:0034046 poly(G) binding; GO:0070717 poly-purine tract binding; GO:0097159 organic cyclic compound binding; GO:1901363 heterocyclic compound binding;	PF00076	PF00076 RNA recognition motif. (a.k.a. RRM, RBD, or RNP domain)	R	KOG0118	FOG: RRM domain				R-HSA-1280215 Cytokine Signaling in Immune system;R-HSA-168256 Immune System;R-HSA-447115 Interleukin-12 family signaling;R-HSA-449147 Signaling by Interleukins;R-HSA-8950505 Gene and protein expression by JAK-STAT signaling after Interleukin-12 stimulation;R-HSA-9020591 Interleukin-12 signaling	https://reactome.org/PathwayBrowser/#/R-HSA-1280215;https://reactome.org/PathwayBrowser/#/R-HSA-168256;https://reactome.org/PathwayBrowser/#/R-HSA-447115;https://reactome.org/PathwayBrowser/#/R-HSA-449147;https://reactome.org/PathwayBrowser/#/R-HSA-8950505;https://reactome.org/PathwayBrowser/#/R-HSA-9020591
O14979	311	K	1.26208	None	Heterogeneous nuclear ribonucleoprotein D-like OS=Homo sapiens OX=9606 GN=HNRNPDL PE=1 SV=3	HNRNPDL	1	0.00626266	54.436	2	VAQPK(1)EVYR	0.12191	86163	100050	0.888428	1.12127	nucleus	K13044			GO:0006139 nucleobase-containing compound metabolic process; GO:0006396 RNA processing; GO:0006725 cellular aromatic compound metabolic process; GO:0006807 nitrogen compound metabolic process; GO:0007154 cell communication; GO:0007165 signal transduction; GO:0007166 cell surface receptor signaling pathway; GO:0008152 metabolic process; GO:0009987 cellular process; GO:0010033 response to organic s…	GO:0005622 intracellular anatomical structure; GO:0005634 nucleus; GO:0005654 nucleoplasm; GO:0005681 spliceosomal complex; GO:0005737 cytoplasm; GO:0005829 cytosol; GO:0031974 membrane-enclosed lumen; GO:0031981 nuclear lumen; GO:0032991 protein-containing complex; GO:0043226 organelle; GO:0043227 membrane-bounded organelle; GO:0043229 intracellular organelle; GO:0043231 intracellular membrane-b…	GO:0003676 nucleic acid binding; GO:0003677 DNA binding; GO:0003690 double-stranded DNA binding; GO:0003697 single-stranded DNA binding; GO:0003723 RNA binding; GO:0003727 single-stranded RNA binding; GO:0005488 binding; GO:0008143 poly(A) binding; GO:0034046 poly(G) binding; GO:0070717 poly-purine tract binding; GO:0097159 organic cyclic compound binding; GO:1901363 heterocyclic compound binding;	PF00076	PF00076 RNA recognition motif. (a.k.a. RRM, RBD, or RNP domain)	R	KOG0118	FOG: RRM domain				R-HSA-1280215 Cytokine Signaling in Immune system;R-HSA-168256 Immune System;R-HSA-447115 Interleukin-12 family signaling;R-HSA-449147 Signaling by Interleukins;R-HSA-8950505 Gene and protein expression by JAK-STAT signaling after Interleukin-12 stimulation;R-HSA-9020591 Interleukin-12 signaling	https://reactome.org/PathwayBrowser/#/R-HSA-1280215;https://reactome.org/PathwayBrowser/#/R-HSA-168256;https://reactome.org/PathwayBrowser/#/R-HSA-447115;https://reactome.org/PathwayBrowser/#/R-HSA-449147;https://reactome.org/PathwayBrowser/#/R-HSA-8950505;https://reactome.org/PathwayBrowser/#/R-HSA-9020591
O14979	209	K		None	Heterogeneous nuclear ribonucleoprotein D-like OS=Homo sapiens OX=9606 GN=HNRNPDL PE=1 SV=3	HNRNPDL	1	0.0308386	45.489	2	VLELK(1)EHK	-0.65729	12383	0	0.960023		nucleus	K13044			GO:0006139 nucleobase-containing compound metabolic process; GO:0006396 RNA processing; GO:0006725 cellular aromatic compound metabolic process; GO:0006807 nitrogen compound metabolic process; GO:0007154 cell communication; GO:0007165 signal transduction; GO:0007166 cell surface receptor signaling pathway; GO:0008152 metabolic process; GO:0009987 cellular process; GO:0010033 response to organic s…	GO:0005622 intracellular anatomical structure; GO:0005634 nucleus; GO:0005654 nucleoplasm; GO:0005681 spliceosomal complex; GO:0005737 cytoplasm; GO:0005829 cytosol; GO:0031974 membrane-enclosed lumen; GO:0031981 nuclear lumen; GO:0032991 protein-containing complex; GO:0043226 organelle; GO:0043227 membrane-bounded organelle; GO:0043229 intracellular organelle; GO:0043231 intracellular membrane-b…	GO:0003676 nucleic acid binding; GO:0003677 DNA binding; GO:0003690 double-stranded DNA binding; GO:0003697 single-stranded DNA binding; GO:0003723 RNA binding; GO:0003727 single-stranded RNA binding; GO:0005488 binding; GO:0008143 poly(A) binding; GO:0034046 poly(G) binding; GO:0070717 poly-purine tract binding; GO:0097159 organic cyclic compound binding; GO:1901363 heterocyclic compound binding;	PF00076	PF00076 RNA recognition motif. (a.k.a. RRM, RBD, or RNP domain)	R	KOG0118	FOG: RRM domain				R-HSA-1280215 Cytokine Signaling in Immune system;R-HSA-168256 Immune System;R-HSA-447115 Interleukin-12 family signaling;R-HSA-449147 Signaling by Interleukins;R-HSA-8950505 Gene and protein expression by JAK-STAT signaling after Interleukin-12 stimulation;R-HSA-9020591 Interleukin-12 signaling	https://reactome.org/PathwayBrowser/#/R-HSA-1280215;https://reactome.org/PathwayBrowser/#/R-HSA-168256;https://reactome.org/PathwayBrowser/#/R-HSA-447115;https://reactome.org/PathwayBrowser/#/R-HSA-449147;https://reactome.org/PathwayBrowser/#/R-HSA-8950505;https://reactome.org/PathwayBrowser/#/R-HSA-9020591
O14981	248	K	1.20049	None	TATA-binding protein-associated factor 172 OS=Homo sapiens OX=9606 GN=BTAF1 PE=1 SV=2	BTAF1	1	5.30977e-20	162.23	2	K(1)IANVVINQSANDSK	-1.0718	82190	118050	0.901542	1.08229	plasma membrane	K15192			GO:0006355 regulation of transcription, DNA-templated; GO:0009889 regulation of biosynthetic process; GO:0009890 negative regulation of biosynthetic process; GO:0009892 negative regulation of metabolic process; GO:0010468 regulation of gene expression; GO:0010556 regulation of macromolecule biosynthetic process; GO:0010558 negative regulation of macromolecule biosynthetic process; GO:0010605 nega…	GO:0005622 intracellular anatomical structure; GO:0005634 nucleus; GO:0005654 nucleoplasm; GO:0031974 membrane-enclosed lumen; GO:0031981 nuclear lumen; GO:0043226 organelle; GO:0043227 membrane-bounded organelle; GO:0043229 intracellular organelle; GO:0043231 intracellular membrane-bounded organelle; GO:0043233 organelle lumen; GO:0070013 intracellular organelle lumen;	GO:0003700 DNA-binding transcription factor activity; GO:0140110 transcription regulator activity;	PF00176; PF00271	PF00176 SNF2-related domain; PF00271 Helicase conserved C-terminal domain	K	KOG0392	SNF2 family DNA-dependent ATPase domain-containing protein	WP2853 ENDODERM DIFFERENTIATION	http://www.wikipathways.org/instance/WP2853_r116557	Transcription factor
O15014	586	K		None	Zinc finger protein 609 OS=Homo sapiens OX=9606 GN=ZNF609 PE=1 SV=2	ZNF609	1	0.00924103	63.301	2	FSTK(1)GLCK	2.4667	34917	0			nucleus				GO:0002682 regulation of immune system process; GO:0002684 positive regulation of immune system process; GO:0002694 regulation of leukocyte activation; GO:0002696 positive regulation of leukocyte activation; GO:0006355 regulation of transcription, DNA-templated; GO:0006357 regulation of transcription by RNA polymerase II; GO:0007275 multicellular organism development; GO:0007399 nervous system de…	GO:0000428 DNA-directed RNA polymerase complex; GO:0005622 intracellular anatomical structure; GO:0005634 nucleus; GO:0005654 nucleoplasm; GO:0016591 RNA polymerase II, holoenzyme; GO:0030880 RNA polymerase complex; GO:0031974 membrane-enclosed lumen; GO:0031981 nuclear lumen; GO:0032039 integrator complex; GO:0032991 protein-containing complex; GO:0043226 organelle; GO:0043227 membrane-bounded o…
O15014	84	K		None	Zinc finger protein 609 OS=Homo sapiens OX=9606 GN=ZNF609 PE=1 SV=2	ZNF609	1	0.000176054	51.531	2	FVTPVPGPQGK(1)EGK	0.62155	29413	28871			nucleus				GO:0002682 regulation of immune system process; GO:0002684 positive regulation of immune system process; GO:0002694 regulation of leukocyte activation; GO:0002696 positive regulation of leukocyte activation; GO:0006355 regulation of transcription, DNA-templated; GO:0006357 regulation of transcription by RNA polymerase II; GO:0007275 multicellular organism development; GO:0007399 nervous system de…	GO:0000428 DNA-directed RNA polymerase complex; GO:0005622 intracellular anatomical structure; GO:0005634 nucleus; GO:0005654 nucleoplasm; GO:0016591 RNA polymerase II, holoenzyme; GO:0030880 RNA polymerase complex; GO:0031974 membrane-enclosed lumen; GO:0031981 nuclear lumen; GO:0032039 integrator complex; GO:0032991 protein-containing complex; GO:0043226 organelle; GO:0043227 membrane-bounded o…
O15014	651	K		None	Zinc finger protein 609 OS=Homo sapiens OX=9606 GN=ZNF609 PE=1 SV=2	ZNF609	1	0.0681893	44.767	2	IPSK(1)SLK	-0.68854	0	18770			nucleus				GO:0002682 regulation of immune system process; GO:0002684 positive regulation of immune system process; GO:0002694 regulation of leukocyte activation; GO:0002696 positive regulation of leukocyte activation; GO:0006355 regulation of transcription, DNA-templated; GO:0006357 regulation of transcription by RNA polymerase II; GO:0007275 multicellular organism development; GO:0007399 nervous system de…	GO:0000428 DNA-directed RNA polymerase complex; GO:0005622 intracellular anatomical structure; GO:0005634 nucleus; GO:0005654 nucleoplasm; GO:0016591 RNA polymerase II, holoenzyme; GO:0030880 RNA polymerase complex; GO:0031974 membrane-enclosed lumen; GO:0031981 nuclear lumen; GO:0032039 integrator complex; GO:0032991 protein-containing complex; GO:0043226 organelle; GO:0043227 membrane-bounded o…
O15014	647	K		None	Zinc finger protein 609 OS=Homo sapiens OX=9606 GN=ZNF609 PE=1 SV=2	ZNF609	0.992225	0.0164127	54.199	3	KPSSLK(0.008)PEK(0.992)IPSK	1.9066	36638	56648			nucleus				GO:0002682 regulation of immune system process; GO:0002684 positive regulation of immune system process; GO:0002694 regulation of leukocyte activation; GO:0002696 positive regulation of leukocyte activation; GO:0006355 regulation of transcription, DNA-templated; GO:0006357 regulation of transcription by RNA polymerase II; GO:0007275 multicellular organism development; GO:0007399 nervous system de…	GO:0000428 DNA-directed RNA polymerase complex; GO:0005622 intracellular anatomical structure; GO:0005634 nucleus; GO:0005654 nucleoplasm; GO:0016591 RNA polymerase II, holoenzyme; GO:0030880 RNA polymerase complex; GO:0031974 membrane-enclosed lumen; GO:0031981 nuclear lumen; GO:0032039 integrator complex; GO:0032991 protein-containing complex; GO:0043226 organelle; GO:0043227 membrane-bounded o…
O15014	1297	K		None	Zinc finger protein 609 OS=Homo sapiens OX=9606 GN=ZNF609 PE=1 SV=2	ZNF609	1	4.72369e-05	67.838	3	SSSESK(1)ALDILQQHASHYK	-0.1064	15151	33841			nucleus				GO:0002682 regulation of immune system process; GO:0002684 positive regulation of immune system process; GO:0002694 regulation of leukocyte activation; GO:0002696 positive regulation of leukocyte activation; GO:0006355 regulation of transcription, DNA-templated; GO:0006357 regulation of transcription by RNA polymerase II; GO:0007275 multicellular organism development; GO:0007399 nervous system de…	GO:0000428 DNA-directed RNA polymerase complex; GO:0005622 intracellular anatomical structure; GO:0005634 nucleus; GO:0005654 nucleoplasm; GO:0016591 RNA polymerase II, holoenzyme; GO:0030880 RNA polymerase complex; GO:0031974 membrane-enclosed lumen; GO:0031981 nuclear lumen; GO:0032039 integrator complex; GO:0032991 protein-containing complex; GO:0043226 organelle; GO:0043227 membrane-bounded o…
O15014	1100	K		None	Zinc finger protein 609 OS=Homo sapiens OX=9606 GN=ZNF609 PE=1 SV=2	ZNF609	1	0.000728075	62.271	2	VK(1)LSDASHLSK	-0.29563	0	16259			nucleus				GO:0002682 regulation of immune system process; GO:0002684 positive regulation of immune system process; GO:0002694 regulation of leukocyte activation; GO:0002696 positive regulation of leukocyte activation; GO:0006355 regulation of transcription, DNA-templated; GO:0006357 regulation of transcription by RNA polymerase II; GO:0007275 multicellular organism development; GO:0007399 nervous system de…	GO:0000428 DNA-directed RNA polymerase complex; GO:0005622 intracellular anatomical structure; GO:0005634 nucleus; GO:0005654 nucleoplasm; GO:0016591 RNA polymerase II, holoenzyme; GO:0030880 RNA polymerase complex; GO:0031974 membrane-enclosed lumen; GO:0031981 nuclear lumen; GO:0032039 integrator complex; GO:0032991 protein-containing complex; GO:0043226 organelle; GO:0043227 membrane-bounded o…
O15042	88	K	1.52957	Up	U2 snRNP-associated SURP motif-containing protein OS=Homo sapiens OX=9606 GN=U2SURP PE=1 SV=2	U2SURP	1	1.0216e-05	97.277	2	AFSIGK(1)MSTAK	-0.34961	202910	328660	0.785939	1.20215	nucleus	K12842	SR140; U2-associated protein SR140	hsa03040 Spliceosome	GO:0000375 RNA splicing, via transesterification reactions; GO:0000377 RNA splicing, via transesterification reactions with bulged adenosine as nucleophile; GO:0000398 mRNA splicing, via spliceosome; GO:0006139 nucleobase-containing compound metabolic process; GO:0006396 RNA processing; GO:0006397 mRNA processing; GO:0006725 cellular aromatic compound metabolic process; GO:0006807 nitrogen compou…	GO:0005622 intracellular anatomical structure; GO:0005634 nucleus; GO:0005654 nucleoplasm; GO:0031974 membrane-enclosed lumen; GO:0031981 nuclear lumen; GO:0043226 organelle; GO:0043227 membrane-bounded organelle; GO:0043229 intracellular organelle; GO:0043231 intracellular membrane-bounded organelle; GO:0043233 organelle lumen; GO:0070013 intracellular organelle lumen;	GO:0003676 nucleic acid binding; GO:0003723 RNA binding; GO:0003729 mRNA binding; GO:0005488 binding; GO:0097159 organic cyclic compound binding; GO:1901363 heterocyclic compound binding;	PF00076; PF08312	PF00076 RNA recognition motif. (a.k.a. RRM, RBD, or RNP domain); PF08312 cwf21 domain	R	KOG0151	Predicted splicing regulator, contains RRM, SWAP and RPR domains				R-HSA-72163 mRNA Splicing - Major Pathway;R-HSA-72172 mRNA Splicing;R-HSA-72203 Processing of Capped Intron-Containing Pre-mRNA;R-HSA-8953854 Metabolism of RNA	https://reactome.org/PathwayBrowser/#/R-HSA-72163;https://reactome.org/PathwayBrowser/#/R-HSA-72172;https://reactome.org/PathwayBrowser/#/R-HSA-72203;https://reactome.org/PathwayBrowser/#/R-HSA-8953854
O15042	862	K		None	U2 snRNP-associated SURP motif-containing protein OS=Homo sapiens OX=9606 GN=U2SURP PE=1 SV=2	U2SURP	1	0.0207222	47.334	2	FQDELESGK(1)RPK	0.77506	0	3512.9		0.972166	nucleus	K12842	SR140; U2-associated protein SR140	hsa03040 Spliceosome	GO:0000375 RNA splicing, via transesterification reactions; GO:0000377 RNA splicing, via transesterification reactions with bulged adenosine as nucleophile; GO:0000398 mRNA splicing, via spliceosome; GO:0006139 nucleobase-containing compound metabolic process; GO:0006396 RNA processing; GO:0006397 mRNA processing; GO:0006725 cellular aromatic compound metabolic process; GO:0006807 nitrogen compou…	GO:0005622 intracellular anatomical structure; GO:0005634 nucleus; GO:0005654 nucleoplasm; GO:0031974 membrane-enclosed lumen; GO:0031981 nuclear lumen; GO:0043226 organelle; GO:0043227 membrane-bounded organelle; GO:0043229 intracellular organelle; GO:0043231 intracellular membrane-bounded organelle; GO:0043233 organelle lumen; GO:0070013 intracellular organelle lumen;	GO:0003676 nucleic acid binding; GO:0003723 RNA binding; GO:0003729 mRNA binding; GO:0005488 binding; GO:0097159 organic cyclic compound binding; GO:1901363 heterocyclic compound binding;	PF00076; PF08312	PF00076 RNA recognition motif. (a.k.a. RRM, RBD, or RNP domain); PF08312 cwf21 domain	R	KOG0151	Predicted splicing regulator, contains RRM, SWAP and RPR domains				R-HSA-72163 mRNA Splicing - Major Pathway;R-HSA-72172 mRNA Splicing;R-HSA-72203 Processing of Capped Intron-Containing Pre-mRNA;R-HSA-8953854 Metabolism of RNA	https://reactome.org/PathwayBrowser/#/R-HSA-72163;https://reactome.org/PathwayBrowser/#/R-HSA-72172;https://reactome.org/PathwayBrowser/#/R-HSA-72203;https://reactome.org/PathwayBrowser/#/R-HSA-8953854
O15042	832	K	1.30421	None	U2 snRNP-associated SURP motif-containing protein OS=Homo sapiens OX=9606 GN=U2SURP PE=1 SV=2	U2SURP	1	1.47596e-15	157.77	2	FSK(1)YSEMSEEK	2.6792	127240	175730	0.864708	1.12776	nucleus	K12842	SR140; U2-associated protein SR140	hsa03040 Spliceosome	GO:0000375 RNA splicing, via transesterification reactions; GO:0000377 RNA splicing, via transesterification reactions with bulged adenosine as nucleophile; GO:0000398 mRNA splicing, via spliceosome; GO:0006139 nucleobase-containing compound metabolic process; GO:0006396 RNA processing; GO:0006397 mRNA processing; GO:0006725 cellular aromatic compound metabolic process; GO:0006807 nitrogen compou…	GO:0005622 intracellular anatomical structure; GO:0005634 nucleus; GO:0005654 nucleoplasm; GO:0031974 membrane-enclosed lumen; GO:0031981 nuclear lumen; GO:0043226 organelle; GO:0043227 membrane-bounded organelle; GO:0043229 intracellular organelle; GO:0043231 intracellular membrane-bounded organelle; GO:0043233 organelle lumen; GO:0070013 intracellular organelle lumen;	GO:0003676 nucleic acid binding; GO:0003723 RNA binding; GO:0003729 mRNA binding; GO:0005488 binding; GO:0097159 organic cyclic compound binding; GO:1901363 heterocyclic compound binding;	PF00076; PF08312	PF00076 RNA recognition motif. (a.k.a. RRM, RBD, or RNP domain); PF08312 cwf21 domain	R	KOG0151	Predicted splicing regulator, contains RRM, SWAP and RPR domains				R-HSA-72163 mRNA Splicing - Major Pathway;R-HSA-72172 mRNA Splicing;R-HSA-72203 Processing of Capped Intron-Containing Pre-mRNA;R-HSA-8953854 Metabolism of RNA	https://reactome.org/PathwayBrowser/#/R-HSA-72163;https://reactome.org/PathwayBrowser/#/R-HSA-72172;https://reactome.org/PathwayBrowser/#/R-HSA-72203;https://reactome.org/PathwayBrowser/#/R-HSA-8953854
O15042	156	K		None	U2 snRNP-associated SURP motif-containing protein OS=Homo sapiens OX=9606 GN=U2SURP PE=1 SV=2	U2SURP	1	0.00080182	83.623	2	GK(1)IYKPSSR	2.7749	105000	0	1.02947		nucleus	K12842	SR140; U2-associated protein SR140	hsa03040 Spliceosome	GO:0000375 RNA splicing, via transesterification reactions; GO:0000377 RNA splicing, via transesterification reactions with bulged adenosine as nucleophile; GO:0000398 mRNA splicing, via spliceosome; GO:0006139 nucleobase-containing compound metabolic process; GO:0006396 RNA processing; GO:0006397 mRNA processing; GO:0006725 cellular aromatic compound metabolic process; GO:0006807 nitrogen compou…	GO:0005622 intracellular anatomical structure; GO:0005634 nucleus; GO:0005654 nucleoplasm; GO:0031974 membrane-enclosed lumen; GO:0031981 nuclear lumen; GO:0043226 organelle; GO:0043227 membrane-bounded organelle; GO:0043229 intracellular organelle; GO:0043231 intracellular membrane-bounded organelle; GO:0043233 organelle lumen; GO:0070013 intracellular organelle lumen;	GO:0003676 nucleic acid binding; GO:0003723 RNA binding; GO:0003729 mRNA binding; GO:0005488 binding; GO:0097159 organic cyclic compound binding; GO:1901363 heterocyclic compound binding;	PF00076; PF08312	PF00076 RNA recognition motif. (a.k.a. RRM, RBD, or RNP domain); PF08312 cwf21 domain	R	KOG0151	Predicted splicing regulator, contains RRM, SWAP and RPR domains				R-HSA-72163 mRNA Splicing - Major Pathway;R-HSA-72172 mRNA Splicing;R-HSA-72203 Processing of Capped Intron-Containing Pre-mRNA;R-HSA-8953854 Metabolism of RNA	https://reactome.org/PathwayBrowser/#/R-HSA-72163;https://reactome.org/PathwayBrowser/#/R-HSA-72172;https://reactome.org/PathwayBrowser/#/R-HSA-72203;https://reactome.org/PathwayBrowser/#/R-HSA-8953854
O15042	159	K		None	U2 snRNP-associated SURP motif-containing protein OS=Homo sapiens OX=9606 GN=U2SURP PE=1 SV=2	U2SURP	1	0.00607232	80.294	2	IYK(1)PSSR	2.2428	31457	0	1.02947		nucleus	K12842	SR140; U2-associated protein SR140	hsa03040 Spliceosome	GO:0000375 RNA splicing, via transesterification reactions; GO:0000377 RNA splicing, via transesterification reactions with bulged adenosine as nucleophile; GO:0000398 mRNA splicing, via spliceosome; GO:0006139 nucleobase-containing compound metabolic process; GO:0006396 RNA processing; GO:0006397 mRNA processing; GO:0006725 cellular aromatic compound metabolic process; GO:0006807 nitrogen compou…	GO:0005622 intracellular anatomical structure; GO:0005634 nucleus; GO:0005654 nucleoplasm; GO:0031974 membrane-enclosed lumen; GO:0031981 nuclear lumen; GO:0043226 organelle; GO:0043227 membrane-bounded organelle; GO:0043229 intracellular organelle; GO:0043231 intracellular membrane-bounded organelle; GO:0043233 organelle lumen; GO:0070013 intracellular organelle lumen;	GO:0003676 nucleic acid binding; GO:0003723 RNA binding; GO:0003729 mRNA binding; GO:0005488 binding; GO:0097159 organic cyclic compound binding; GO:1901363 heterocyclic compound binding;	PF00076; PF08312	PF00076 RNA recognition motif. (a.k.a. RRM, RBD, or RNP domain); PF08312 cwf21 domain	R	KOG0151	Predicted splicing regulator, contains RRM, SWAP and RPR domains				R-HSA-72163 mRNA Splicing - Major Pathway;R-HSA-72172 mRNA Splicing;R-HSA-72203 Processing of Capped Intron-Containing Pre-mRNA;R-HSA-8953854 Metabolism of RNA	https://reactome.org/PathwayBrowser/#/R-HSA-72163;https://reactome.org/PathwayBrowser/#/R-HSA-72172;https://reactome.org/PathwayBrowser/#/R-HSA-72203;https://reactome.org/PathwayBrowser/#/R-HSA-8953854
O15042	755	K	1.35134	None	U2 snRNP-associated SURP motif-containing protein OS=Homo sapiens OX=9606 GN=U2SURP PE=1 SV=2	U2SURP	1	7.97786e-08	108.24	2	NEPIFK(1)VAPSK	-0.7438	202180	289320	0.846955	1.14453	nucleus	K12842	SR140; U2-associated protein SR140	hsa03040 Spliceosome	GO:0000375 RNA splicing, via transesterification reactions; GO:0000377 RNA splicing, via transesterification reactions with bulged adenosine as nucleophile; GO:0000398 mRNA splicing, via spliceosome; GO:0006139 nucleobase-containing compound metabolic process; GO:0006396 RNA processing; GO:0006397 mRNA processing; GO:0006725 cellular aromatic compound metabolic process; GO:0006807 nitrogen compou…	GO:0005622 intracellular anatomical structure; GO:0005634 nucleus; GO:0005654 nucleoplasm; GO:0031974 membrane-enclosed lumen; GO:0031981 nuclear lumen; GO:0043226 organelle; GO:0043227 membrane-bounded organelle; GO:0043229 intracellular organelle; GO:0043231 intracellular membrane-bounded organelle; GO:0043233 organelle lumen; GO:0070013 intracellular organelle lumen;	GO:0003676 nucleic acid binding; GO:0003723 RNA binding; GO:0003729 mRNA binding; GO:0005488 binding; GO:0097159 organic cyclic compound binding; GO:1901363 heterocyclic compound binding;	PF00076; PF08312	PF00076 RNA recognition motif. (a.k.a. RRM, RBD, or RNP domain); PF08312 cwf21 domain	R	KOG0151	Predicted splicing regulator, contains RRM, SWAP and RPR domains				R-HSA-72163 mRNA Splicing - Major Pathway;R-HSA-72172 mRNA Splicing;R-HSA-72203 Processing of Capped Intron-Containing Pre-mRNA;R-HSA-8953854 Metabolism of RNA	https://reactome.org/PathwayBrowser/#/R-HSA-72163;https://reactome.org/PathwayBrowser/#/R-HSA-72172;https://reactome.org/PathwayBrowser/#/R-HSA-72203;https://reactome.org/PathwayBrowser/#/R-HSA-8953854
O15042	760	K		None	U2 snRNP-associated SURP motif-containing protein OS=Homo sapiens OX=9606 GN=U2SURP PE=1 SV=2	U2SURP	1	8.76903e-06	50.621	2	VAPSK(1)WEAVDESELEAQAVTTSK	0.74631	184740	0	1.02947		nucleus	K12842	SR140; U2-associated protein SR140	hsa03040 Spliceosome	GO:0000375 RNA splicing, via transesterification reactions; GO:0000377 RNA splicing, via transesterification reactions with bulged adenosine as nucleophile; GO:0000398 mRNA splicing, via spliceosome; GO:0006139 nucleobase-containing compound metabolic process; GO:0006396 RNA processing; GO:0006397 mRNA processing; GO:0006725 cellular aromatic compound metabolic process; GO:0006807 nitrogen compou…	GO:0005622 intracellular anatomical structure; GO:0005634 nucleus; GO:0005654 nucleoplasm; GO:0031974 membrane-enclosed lumen; GO:0031981 nuclear lumen; GO:0043226 organelle; GO:0043227 membrane-bounded organelle; GO:0043229 intracellular organelle; GO:0043231 intracellular membrane-bounded organelle; GO:0043233 organelle lumen; GO:0070013 intracellular organelle lumen;	GO:0003676 nucleic acid binding; GO:0003723 RNA binding; GO:0003729 mRNA binding; GO:0005488 binding; GO:0097159 organic cyclic compound binding; GO:1901363 heterocyclic compound binding;	PF00076; PF08312	PF00076 RNA recognition motif. (a.k.a. RRM, RBD, or RNP domain); PF08312 cwf21 domain	R	KOG0151	Predicted splicing regulator, contains RRM, SWAP and RPR domains				R-HSA-72163 mRNA Splicing - Major Pathway;R-HSA-72172 mRNA Splicing;R-HSA-72203 Processing of Capped Intron-Containing Pre-mRNA;R-HSA-8953854 Metabolism of RNA	https://reactome.org/PathwayBrowser/#/R-HSA-72163;https://reactome.org/PathwayBrowser/#/R-HSA-72172;https://reactome.org/PathwayBrowser/#/R-HSA-72203;https://reactome.org/PathwayBrowser/#/R-HSA-8953854
O15042	201	K	1.72756	Up	U2 snRNP-associated SURP motif-containing protein OS=Homo sapiens OX=9606 GN=U2SURP PE=1 SV=2	U2SURP	1	8.30363e-05	142.04	2	K(1)SNLELFK	0.90599	28645	52403	0.7277	1.25714	nucleus	K12842	SR140; U2-associated protein SR140	hsa03040 Spliceosome	GO:0000375 RNA splicing, via transesterification reactions; GO:0000377 RNA splicing, via transesterification reactions with bulged adenosine as nucleophile; GO:0000398 mRNA splicing, via spliceosome; GO:0006139 nucleobase-containing compound metabolic process; GO:0006396 RNA processing; GO:0006397 mRNA processing; GO:0006725 cellular aromatic compound metabolic process; GO:0006807 nitrogen compou…	GO:0005622 intracellular anatomical structure; GO:0005634 nucleus; GO:0005654 nucleoplasm; GO:0031974 membrane-enclosed lumen; GO:0031981 nuclear lumen; GO:0043226 organelle; GO:0043227 membrane-bounded organelle; GO:0043229 intracellular organelle; GO:0043231 intracellular membrane-bounded organelle; GO:0043233 organelle lumen; GO:0070013 intracellular organelle lumen;	GO:0003676 nucleic acid binding; GO:0003723 RNA binding; GO:0003729 mRNA binding; GO:0005488 binding; GO:0097159 organic cyclic compound binding; GO:1901363 heterocyclic compound binding;	PF00076; PF08312	PF00076 RNA recognition motif. (a.k.a. RRM, RBD, or RNP domain); PF08312 cwf21 domain	R	KOG0151	Predicted splicing regulator, contains RRM, SWAP and RPR domains				R-HSA-72163 mRNA Splicing - Major Pathway;R-HSA-72172 mRNA Splicing;R-HSA-72203 Processing of Capped Intron-Containing Pre-mRNA;R-HSA-8953854 Metabolism of RNA	https://reactome.org/PathwayBrowser/#/R-HSA-72163;https://reactome.org/PathwayBrowser/#/R-HSA-72172;https://reactome.org/PathwayBrowser/#/R-HSA-72203;https://reactome.org/PathwayBrowser/#/R-HSA-8953854
O15042	208	K		None	U2 snRNP-associated SURP motif-containing protein OS=Homo sapiens OX=9606 GN=U2SURP PE=1 SV=2	U2SURP	1	0.0018883	58.889	2	SNLELFK(1)EELK	-4.0353	0	9053.9		0.972166	nucleus	K12842	SR140; U2-associated protein SR140	hsa03040 Spliceosome	GO:0000375 RNA splicing, via transesterification reactions; GO:0000377 RNA splicing, via transesterification reactions with bulged adenosine as nucleophile; GO:0000398 mRNA splicing, via spliceosome; GO:0006139 nucleobase-containing compound metabolic process; GO:0006396 RNA processing; GO:0006397 mRNA processing; GO:0006725 cellular aromatic compound metabolic process; GO:0006807 nitrogen compou…	GO:0005622 intracellular anatomical structure; GO:0005634 nucleus; GO:0005654 nucleoplasm; GO:0031974 membrane-enclosed lumen; GO:0031981 nuclear lumen; GO:0043226 organelle; GO:0043227 membrane-bounded organelle; GO:0043229 intracellular organelle; GO:0043231 intracellular membrane-bounded organelle; GO:0043233 organelle lumen; GO:0070013 intracellular organelle lumen;	GO:0003676 nucleic acid binding; GO:0003723 RNA binding; GO:0003729 mRNA binding; GO:0005488 binding; GO:0097159 organic cyclic compound binding; GO:1901363 heterocyclic compound binding;	PF00076; PF08312	PF00076 RNA recognition motif. (a.k.a. RRM, RBD, or RNP domain); PF08312 cwf21 domain	R	KOG0151	Predicted splicing regulator, contains RRM, SWAP and RPR domains				R-HSA-72163 mRNA Splicing - Major Pathway;R-HSA-72172 mRNA Splicing;R-HSA-72203 Processing of Capped Intron-Containing Pre-mRNA;R-HSA-8953854 Metabolism of RNA	https://reactome.org/PathwayBrowser/#/R-HSA-72163;https://reactome.org/PathwayBrowser/#/R-HSA-72172;https://reactome.org/PathwayBrowser/#/R-HSA-72203;https://reactome.org/PathwayBrowser/#/R-HSA-8953854
O15042	82	K	1.68523	Up	U2 snRNP-associated SURP motif-containing protein OS=Homo sapiens OX=9606 GN=U2SURP PE=1 SV=2	U2SURP	1	0.00378288	76.605	2	LK(1)AFSIGK	-1.1826	22058	39364	0.739414	1.24608	nucleus	K12842	SR140; U2-associated protein SR140	hsa03040 Spliceosome	GO:0000375 RNA splicing, via transesterification reactions; GO:0000377 RNA splicing, via transesterification reactions with bulged adenosine as nucleophile; GO:0000398 mRNA splicing, via spliceosome; GO:0006139 nucleobase-containing compound metabolic process; GO:0006396 RNA processing; GO:0006397 mRNA processing; GO:0006725 cellular aromatic compound metabolic process; GO:0006807 nitrogen compou…	GO:0005622 intracellular anatomical structure; GO:0005634 nucleus; GO:0005654 nucleoplasm; GO:0031974 membrane-enclosed lumen; GO:0031981 nuclear lumen; GO:0043226 organelle; GO:0043227 membrane-bounded organelle; GO:0043229 intracellular organelle; GO:0043231 intracellular membrane-bounded organelle; GO:0043233 organelle lumen; GO:0070013 intracellular organelle lumen;	GO:0003676 nucleic acid binding; GO:0003723 RNA binding; GO:0003729 mRNA binding; GO:0005488 binding; GO:0097159 organic cyclic compound binding; GO:1901363 heterocyclic compound binding;	PF00076; PF08312	PF00076 RNA recognition motif. (a.k.a. RRM, RBD, or RNP domain); PF08312 cwf21 domain	R	KOG0151	Predicted splicing regulator, contains RRM, SWAP and RPR domains				R-HSA-72163 mRNA Splicing - Major Pathway;R-HSA-72172 mRNA Splicing;R-HSA-72203 Processing of Capped Intron-Containing Pre-mRNA;R-HSA-8953854 Metabolism of RNA	https://reactome.org/PathwayBrowser/#/R-HSA-72163;https://reactome.org/PathwayBrowser/#/R-HSA-72172;https://reactome.org/PathwayBrowser/#/R-HSA-72203;https://reactome.org/PathwayBrowser/#/R-HSA-8953854
O15042	392	K		None	U2 snRNP-associated SURP motif-containing protein OS=Homo sapiens OX=9606 GN=U2SURP PE=1 SV=2	U2SURP	1	0.0018537	69.915	2	LK(1)NPNAPMLPPPK	2.5372	60465	0	1.02947		nucleus	K12842	SR140; U2-associated protein SR140	hsa03040 Spliceosome	GO:0000375 RNA splicing, via transesterification reactions; GO:0000377 RNA splicing, via transesterification reactions with bulged adenosine as nucleophile; GO:0000398 mRNA splicing, via spliceosome; GO:0006139 nucleobase-containing compound metabolic process; GO:0006396 RNA processing; GO:0006397 mRNA processing; GO:0006725 cellular aromatic compound metabolic process; GO:0006807 nitrogen compou…	GO:0005622 intracellular anatomical structure; GO:0005634 nucleus; GO:0005654 nucleoplasm; GO:0031974 membrane-enclosed lumen; GO:0031981 nuclear lumen; GO:0043226 organelle; GO:0043227 membrane-bounded organelle; GO:0043229 intracellular organelle; GO:0043231 intracellular membrane-bounded organelle; GO:0043233 organelle lumen; GO:0070013 intracellular organelle lumen;	GO:0003676 nucleic acid binding; GO:0003723 RNA binding; GO:0003729 mRNA binding; GO:0005488 binding; GO:0097159 organic cyclic compound binding; GO:1901363 heterocyclic compound binding;	PF00076; PF08312	PF00076 RNA recognition motif. (a.k.a. RRM, RBD, or RNP domain); PF08312 cwf21 domain	R	KOG0151	Predicted splicing regulator, contains RRM, SWAP and RPR domains				R-HSA-72163 mRNA Splicing - Major Pathway;R-HSA-72172 mRNA Splicing;R-HSA-72203 Processing of Capped Intron-Containing Pre-mRNA;R-HSA-8953854 Metabolism of RNA	https://reactome.org/PathwayBrowser/#/R-HSA-72163;https://reactome.org/PathwayBrowser/#/R-HSA-72172;https://reactome.org/PathwayBrowser/#/R-HSA-72203;https://reactome.org/PathwayBrowser/#/R-HSA-8953854
O15042	188	K	1.45932	None	U2 snRNP-associated SURP motif-containing protein OS=Homo sapiens OX=9606 GN=U2SURP PE=1 SV=2	U2SURP	0.760079	1.17659e-09	71.114	4	NPPNQSSNERPPSLLVIETK(0.76)K(0.24)PPLK	-2.3276	89307	138010	0.808908	1.18045	nucleus	K12842	SR140; U2-associated protein SR140	hsa03040 Spliceosome	GO:0000375 RNA splicing, via transesterification reactions; GO:0000377 RNA splicing, via transesterification reactions with bulged adenosine as nucleophile; GO:0000398 mRNA splicing, via spliceosome; GO:0006139 nucleobase-containing compound metabolic process; GO:0006396 RNA processing; GO:0006397 mRNA processing; GO:0006725 cellular aromatic compound metabolic process; GO:0006807 nitrogen compou…	GO:0005622 intracellular anatomical structure; GO:0005634 nucleus; GO:0005654 nucleoplasm; GO:0031974 membrane-enclosed lumen; GO:0031981 nuclear lumen; GO:0043226 organelle; GO:0043227 membrane-bounded organelle; GO:0043229 intracellular organelle; GO:0043231 intracellular membrane-bounded organelle; GO:0043233 organelle lumen; GO:0070013 intracellular organelle lumen;	GO:0003676 nucleic acid binding; GO:0003723 RNA binding; GO:0003729 mRNA binding; GO:0005488 binding; GO:0097159 organic cyclic compound binding; GO:1901363 heterocyclic compound binding;	PF00076; PF08312	PF00076 RNA recognition motif. (a.k.a. RRM, RBD, or RNP domain); PF08312 cwf21 domain	R	KOG0151	Predicted splicing regulator, contains RRM, SWAP and RPR domains				R-HSA-72163 mRNA Splicing - Major Pathway;R-HSA-72172 mRNA Splicing;R-HSA-72203 Processing of Capped Intron-Containing Pre-mRNA;R-HSA-8953854 Metabolism of RNA	https://reactome.org/PathwayBrowser/#/R-HSA-72163;https://reactome.org/PathwayBrowser/#/R-HSA-72172;https://reactome.org/PathwayBrowser/#/R-HSA-72203;https://reactome.org/PathwayBrowser/#/R-HSA-8953854
O15042	80	K	1.19468	None	U2 snRNP-associated SURP motif-containing protein OS=Homo sapiens OX=9606 GN=U2SURP PE=1 SV=2	U2SURP	1	0.000393783	117.39	2	PLLENK(1)LK	-0.292	777170	983200	0.908987	1.08595	nucleus	K12842	SR140; U2-associated protein SR140	hsa03040 Spliceosome	GO:0000375 RNA splicing, via transesterification reactions; GO:0000377 RNA splicing, via transesterification reactions with bulged adenosine as nucleophile; GO:0000398 mRNA splicing, via spliceosome; GO:0006139 nucleobase-containing compound metabolic process; GO:0006396 RNA processing; GO:0006397 mRNA processing; GO:0006725 cellular aromatic compound metabolic process; GO:0006807 nitrogen compou…	GO:0005622 intracellular anatomical structure; GO:0005634 nucleus; GO:0005654 nucleoplasm; GO:0031974 membrane-enclosed lumen; GO:0031981 nuclear lumen; GO:0043226 organelle; GO:0043227 membrane-bounded organelle; GO:0043229 intracellular organelle; GO:0043231 intracellular membrane-bounded organelle; GO:0043233 organelle lumen; GO:0070013 intracellular organelle lumen;	GO:0003676 nucleic acid binding; GO:0003723 RNA binding; GO:0003729 mRNA binding; GO:0005488 binding; GO:0097159 organic cyclic compound binding; GO:1901363 heterocyclic compound binding;	PF00076; PF08312	PF00076 RNA recognition motif. (a.k.a. RRM, RBD, or RNP domain); PF08312 cwf21 domain	R	KOG0151	Predicted splicing regulator, contains RRM, SWAP and RPR domains				R-HSA-72163 mRNA Splicing - Major Pathway;R-HSA-72172 mRNA Splicing;R-HSA-72203 Processing of Capped Intron-Containing Pre-mRNA;R-HSA-8953854 Metabolism of RNA	https://reactome.org/PathwayBrowser/#/R-HSA-72163;https://reactome.org/PathwayBrowser/#/R-HSA-72172;https://reactome.org/PathwayBrowser/#/R-HSA-72203;https://reactome.org/PathwayBrowser/#/R-HSA-8953854
O15047	203	K		None	Histone-lysine N-methyltransferase SETD1A OS=Homo sapiens OX=9606 GN=SETD1A PE=1 SV=3	SETD1A	1	6.10713e-07	136.39	2	ALSEK(1)FQGSGAATETAESR	-1.3016	18571	18438			nucleus	K11422	SETD1; [histone H3]-lysine4 N-trimethyltransferase SETD1 [EC:2.1.1.354]	hsa00310 Lysine degradation; hsa01100 Metabolic pathways	GO:0002682 regulation of immune system process; GO:0006325 chromatin organization; GO:0006464 cellular protein modification process; GO:0006479 protein methylation; GO:0006807 nitrogen compound metabolic process; GO:0006996 organelle organization; GO:0007275 multicellular organism development; GO:0007568 aging; GO:0008152 metabolic process; GO:0008213 protein alkylation; GO:0008340 determination …	GO:0000228 nuclear chromosome; GO:0000785 chromatin; GO:0000791 euchromatin; GO:0005622 intracellular anatomical structure; GO:0005634 nucleus; GO:0005654 nucleoplasm; GO:0005694 chromosome; GO:0005700 polytene chromosome; GO:0005737 cytoplasm; GO:0005829 cytosol; GO:0016604 nuclear body; GO:0016607 nuclear speck; GO:0031974 membrane-enclosed lumen; GO:0031981 nuclear lumen; GO:0032991 protein-co…	GO:0003824 catalytic activity; GO:0005488 binding; GO:0005515 protein binding; GO:0008013 beta-catenin binding; GO:0008134 transcription factor binding; GO:0008168 methyltransferase activity; GO:0008170 N-methyltransferase activity; GO:0008276 protein methyltransferase activity; GO:0008757 S-adenosylmethionine-dependent methyltransferase activity; GO:0016278 lysine N-methyltransferase activity; G…	PF00076; PF11764	PF00076 RNA recognition motif. (a.k.a. RRM, RBD, or RNP domain); PF11764 COMPASS (Complex proteins associated with Set1p) component N	BK	KOG1080	Histone H3 (Lys4) methyltransferase complex, subunit SET1 and related methyltransferases	WP2369 HISTONE MODIFICATIONS	http://www.wikipathways.org/instance/WP2369_r118380	Transcription factor	R-HSA-212436 Generic Transcription Pathway;R-HSA-3214841 PKMTs methylate histone lysines;R-HSA-3247509 Chromatin modifying enzymes;R-HSA-4839726 Chromatin organization;R-HSA-73857 RNA Polymerase II Transcription;R-HSA-74160 Gene expression (Transcription);R-HSA-8878171 Transcriptional regulation by RUNX1;R-HSA-8936459 RUNX1 regulates genes involved in megakaryocyte differentiation and platelet fu…	https://reactome.org/PathwayBrowser/#/R-HSA-212436;https://reactome.org/PathwayBrowser/#/R-HSA-3214841;https://reactome.org/PathwayBrowser/#/R-HSA-3247509;https://reactome.org/PathwayBrowser/#/R-HSA-4839726;https://reactome.org/PathwayBrowser/#/R-HSA-73857;https://reactome.org/PathwayBrowser/#/R-HSA-74160;https://reactome.org/PathwayBrowser/#/R-HSA-8878171;https://reactome.org/PathwayBrowser/#/R-…
O15062	415	K		None	Zinc finger and BTB domain-containing protein 5 OS=Homo sapiens OX=9606 GN=ZBTB5 PE=1 SV=1	ZBTB5	1	0.0100882	42.061	2	STFSISNFLNK(1)SR	-1.6991	0	3909.5			nucleus	K10492			GO:0000122 negative regulation of transcription by RNA polymerase II; GO:0006355 regulation of transcription, DNA-templated; GO:0006357 regulation of transcription by RNA polymerase II; GO:0009889 regulation of biosynthetic process; GO:0009890 negative regulation of biosynthetic process; GO:0009892 negative regulation of metabolic process; GO:0010468 regulation of gene expression; GO:0010556 regu…	GO:0005622 intracellular anatomical structure; GO:0005634 nucleus; GO:0043226 organelle; GO:0043227 membrane-bounded organelle; GO:0043229 intracellular organelle; GO:0043231 intracellular membrane-bounded organelle;	GO:0000976 transcription cis-regulatory region binding; GO:0000977 RNA polymerase II transcription regulatory region sequence-specific DNA binding; GO:0000981 DNA-binding transcription factor activity, RNA polymerase II-specific; GO:0001067 transcription regulatory region nucleic acid binding; GO:0001227 DNA-binding transcription repressor activity, RNA polymerase II-specific; GO:0003676 nucleic …	PF00651	PF00651 BTB/POZ domain	R	KOG1721	FOG: Zn-finger			Transcription factor
O15117	319	K	1.9074	Up	FYN-binding protein 1 OS=Homo sapiens OX=9606 GN=FYB1 PE=1 SV=2	FYB1	1	2.40863e-06	81.578	2	APSK(1)LTVGGPWGQSQEK	-1.7546	23032	41459	0.694172	1.32406	nucleus	K17698	FYB; FYN binding protein	hsa04015 Rap1 signaling pathway; hsa05135 Yersinia infection	GO:0002253 activation of immune response; GO:0002376 immune system process; GO:0002429 immune response-activating cell surface receptor signaling pathway; GO:0002682 regulation of immune system process; GO:0002684 positive regulation of immune system process; GO:0002757 immune response-activating signal transduction; GO:0002764 immune response-regulating signaling pathway; GO:0002768 immune respo…	GO:0005622 intracellular anatomical structure; GO:0005634 nucleus; GO:0005737 cytoplasm; GO:0005829 cytosol; GO:0005856 cytoskeleton; GO:0005886 plasma membrane; GO:0015629 actin cytoskeleton; GO:0016020 membrane; GO:0043226 organelle; GO:0043227 membrane-bounded organelle; GO:0043228 non-membrane-bounded organelle; GO:0043229 intracellular organelle; GO:0043231 intracellular membrane-bounded org…	GO:0005102 signaling receptor binding; GO:0005488 binding; GO:0005515 protein binding; GO:0044877 protein-containing complex binding;	PF07653; PF14603	PF07653 Variant SH3 domain; PF14603 Helically-extended SH3 domain				WP4542 LEUKOCYTEINTRINSIC HIPPO PATHWAY FUNCTIONS;WP69 TCELL RECEPTOR TCR SIGNALING PATHWAY	http://www.wikipathways.org/instance/WP4542_r120673;http://www.wikipathways.org/instance/WP69_r120700		R-HSA-1280218 Adaptive Immune System;R-HSA-1500931 Cell-Cell communication;R-HSA-168256 Immune System;R-HSA-202403 TCR signaling;R-HSA-202433 Generation of second messenger molecules;R-HSA-391160 Signal regulatory protein family interactions	https://reactome.org/PathwayBrowser/#/R-HSA-1280218;https://reactome.org/PathwayBrowser/#/R-HSA-1500931;https://reactome.org/PathwayBrowser/#/R-HSA-168256;https://reactome.org/PathwayBrowser/#/R-HSA-202403;https://reactome.org/PathwayBrowser/#/R-HSA-202433;https://reactome.org/PathwayBrowser/#/R-HSA-391160	ALLOGRAFT REJECTION;APICAL JUNCTION	https://www.gsea-msigdb.org/gsea/msigdb/cards/HALLMARK_ALLOGRAFT_REJECTION;https://www.gsea-msigdb.org/gsea/msigdb/cards/HALLMARK_APICAL_JUNCTION
O15143	308	K		None	Actin-related protein 2/3 complex subunit 1B OS=Homo sapiens OX=9606 GN=ARPC1B PE=1 SV=3	ARPC1B	1	2.25493e-14	126.46	2	K(1)ASSEGGTAAGAGLDSLHK	-2.0058	0	13110		0.993745	cytoplasm	K05757	ARPC1A_B; actin related protein 2/3 complex, subunit 1A/1B	hsa04666 Fc gamma R-mediated phagocytosis; hsa04530 Tight junction; hsa05131 Shigellosis; hsa05100 Bacterial invasion of epithelial cells; hsa05132 Salmonella infection; hsa04810 Regulation of actin cytoskeleton; hsa05130 Pathogenic Escherichia coli infection; hsa04144 Endocytosis; hsa05135 Yersinia infection	GO:0000902 cell morphogenesis; GO:0000904 cell morphogenesis involved in differentiation; GO:0001654 eye development; GO:0001700 embryonic development via the syncytial blastoderm; GO:0001745 compound eye morphogenesis; GO:0002252 immune effector process; GO:0002253 activation of immune response; GO:0002376 immune system process; GO:0002429 immune response-activating cell surface receptor signali…	GO:0005622 intracellular anatomical structure; GO:0005737 cytoplasm; GO:0005829 cytosol; GO:0005856 cytoskeleton; GO:0005885 Arp2/3 protein complex; GO:0015629 actin cytoskeleton; GO:0032991 protein-containing complex; GO:0036284 tubulobulbar complex; GO:0043226 organelle; GO:0043228 non-membrane-bounded organelle; GO:0043229 intracellular organelle; GO:0043232 intracellular non-membrane-bounded …	GO:0003779 actin binding; GO:0005198 structural molecule activity; GO:0005200 structural constituent of cytoskeleton; GO:0005488 binding; GO:0005515 protein binding; GO:0008092 cytoskeletal protein binding; GO:0044877 protein-containing complex binding; GO:0051015 actin filament binding;			Z	KOG1523	Actin-related protein Arp2/3 complex, subunit ARPC1/p41-ARC	WP3937 MICROGLIA PATHOGEN PHAGOCYTOSIS PATHWAY;WP2272 PATHOGENIC ESCHERICHIA COLI INFECTION	http://www.wikipathways.org/instance/WP3937_r120792;http://www.wikipathways.org/instance/WP2272_r118427		R-HSA-1266738 Developmental Biology;R-HSA-162582 Signal Transduction;R-HSA-1643685 Disease;R-HSA-168249 Innate Immune System;R-HSA-168256 Immune System;R-HSA-194315 Signaling by Rho GTPases;R-HSA-195258 RHO GTPase Effectors;R-HSA-2029480 Fcgamma receptor (FCGR) dependent phagocytosis;R-HSA-2029482 Regulation of actin dynamics for phagocytic cup formation;R-HSA-2682334 EPH-Ephrin signaling;R-HSA-3…	https://reactome.org/PathwayBrowser/#/R-HSA-1266738;https://reactome.org/PathwayBrowser/#/R-HSA-162582;https://reactome.org/PathwayBrowser/#/R-HSA-1643685;https://reactome.org/PathwayBrowser/#/R-HSA-168249;https://reactome.org/PathwayBrowser/#/R-HSA-168256;https://reactome.org/PathwayBrowser/#/R-HSA-194315;https://reactome.org/PathwayBrowser/#/R-HSA-195258;https://reactome.org/PathwayBrowser/#/R-…
O15144	295	K	1.34727	None	Actin-related protein 2/3 complex subunit 2 OS=Homo sapiens OX=9606 GN=ARPC2 PE=1 SV=1	ARPC2	1	0.000152521	83.358	2	TITGK(1)TFSSR	0.19507	102620	140050	0.851241	1.14686	cytoplasm	K05758	ARPC2; actin related protein 2/3 complex, subunit 2	hsa04666 Fc gamma R-mediated phagocytosis; hsa04530 Tight junction; hsa05131 Shigellosis; hsa05100 Bacterial invasion of epithelial cells; hsa05132 Salmonella infection; hsa04810 Regulation of actin cytoskeleton; hsa05130 Pathogenic Escherichia coli infection; hsa04144 Endocytosis; hsa05135 Yersinia infection	GO:0000302 response to reactive oxygen species; GO:0000902 cell morphogenesis; GO:0001667 ameboidal-type cell migration; GO:0002009 morphogenesis of an epithelium; GO:0002252 immune effector process; GO:0002253 activation of immune response; GO:0002376 immune system process; GO:0002429 immune response-activating cell surface receptor signaling pathway; GO:0002431 Fc receptor mediated stimulatory …	GO:0001726 ruffle; GO:0002102 podosome; GO:0005622 intracellular anatomical structure; GO:0005737 cytoplasm; GO:0005768 endosome; GO:0005829 cytosol; GO:0005856 cytoskeleton; GO:0005884 actin filament; GO:0005885 Arp2/3 protein complex; GO:0005886 plasma membrane; GO:0005912 adherens junction; GO:0005925 focal adhesion; GO:0009986 cell surface; GO:0012505 endomembrane system; GO:0015629 actin cyt…	GO:0003779 actin binding; GO:0005102 signaling receptor binding; GO:0005198 structural molecule activity; GO:0005200 structural constituent of cytoskeleton; GO:0005488 binding; GO:0005515 protein binding; GO:0008092 cytoskeletal protein binding; GO:0019894 kinesin binding; GO:0019899 enzyme binding; GO:0035254 glutamate receptor binding; GO:0035650 AP-1 adaptor complex binding; GO:0044877 protein…			Z	KOG2826	Actin-related protein Arp2/3 complex, subunit ARPC2	WP2272 PATHOGENIC ESCHERICHIA COLI INFECTION	http://www.wikipathways.org/instance/WP2272_r118427		R-HSA-1266738 Developmental Biology;R-HSA-162582 Signal Transduction;R-HSA-1643685 Disease;R-HSA-168249 Innate Immune System;R-HSA-168256 Immune System;R-HSA-194315 Signaling by Rho GTPases;R-HSA-195258 RHO GTPase Effectors;R-HSA-199991 Membrane Trafficking;R-HSA-2029480 Fcgamma receptor (FCGR) dependent phagocytosis;R-HSA-2029482 Regulation of actin dynamics for phagocytic cup formation;R-HSA-26…	https://reactome.org/PathwayBrowser/#/R-HSA-1266738;https://reactome.org/PathwayBrowser/#/R-HSA-162582;https://reactome.org/PathwayBrowser/#/R-HSA-1643685;https://reactome.org/PathwayBrowser/#/R-HSA-168249;https://reactome.org/PathwayBrowser/#/R-HSA-168256;https://reactome.org/PathwayBrowser/#/R-HSA-194315;https://reactome.org/PathwayBrowser/#/R-HSA-195258;https://reactome.org/PathwayBrowser/#/R-…	APICAL JUNCTION	https://www.gsea-msigdb.org/gsea/msigdb/cards/HALLMARK_APICAL_JUNCTION
O15144	275	K		None	Actin-related protein 2/3 complex subunit 2 OS=Homo sapiens OX=9606 GN=ARPC2 PE=1 SV=1	ARPC2	1	0.00104908	62.969	2	TSDFLK(1)VLNR	-0.82684	0	31918		0.9936	cytoplasm	K05758	ARPC2; actin related protein 2/3 complex, subunit 2	hsa04666 Fc gamma R-mediated phagocytosis; hsa04530 Tight junction; hsa05131 Shigellosis; hsa05100 Bacterial invasion of epithelial cells; hsa05132 Salmonella infection; hsa04810 Regulation of actin cytoskeleton; hsa05130 Pathogenic Escherichia coli infection; hsa04144 Endocytosis; hsa05135 Yersinia infection	GO:0000302 response to reactive oxygen species; GO:0000902 cell morphogenesis; GO:0001667 ameboidal-type cell migration; GO:0002009 morphogenesis of an epithelium; GO:0002252 immune effector process; GO:0002253 activation of immune response; GO:0002376 immune system process; GO:0002429 immune response-activating cell surface receptor signaling pathway; GO:0002431 Fc receptor mediated stimulatory …	GO:0001726 ruffle; GO:0002102 podosome; GO:0005622 intracellular anatomical structure; GO:0005737 cytoplasm; GO:0005768 endosome; GO:0005829 cytosol; GO:0005856 cytoskeleton; GO:0005884 actin filament; GO:0005885 Arp2/3 protein complex; GO:0005886 plasma membrane; GO:0005912 adherens junction; GO:0005925 focal adhesion; GO:0009986 cell surface; GO:0012505 endomembrane system; GO:0015629 actin cyt…	GO:0003779 actin binding; GO:0005102 signaling receptor binding; GO:0005198 structural molecule activity; GO:0005200 structural constituent of cytoskeleton; GO:0005488 binding; GO:0005515 protein binding; GO:0008092 cytoskeletal protein binding; GO:0019894 kinesin binding; GO:0019899 enzyme binding; GO:0035254 glutamate receptor binding; GO:0035650 AP-1 adaptor complex binding; GO:0044877 protein…			Z	KOG2826	Actin-related protein Arp2/3 complex, subunit ARPC2	WP2272 PATHOGENIC ESCHERICHIA COLI INFECTION	http://www.wikipathways.org/instance/WP2272_r118427		R-HSA-1266738 Developmental Biology;R-HSA-162582 Signal Transduction;R-HSA-1643685 Disease;R-HSA-168249 Innate Immune System;R-HSA-168256 Immune System;R-HSA-194315 Signaling by Rho GTPases;R-HSA-195258 RHO GTPase Effectors;R-HSA-199991 Membrane Trafficking;R-HSA-2029480 Fcgamma receptor (FCGR) dependent phagocytosis;R-HSA-2029482 Regulation of actin dynamics for phagocytic cup formation;R-HSA-26…	https://reactome.org/PathwayBrowser/#/R-HSA-1266738;https://reactome.org/PathwayBrowser/#/R-HSA-162582;https://reactome.org/PathwayBrowser/#/R-HSA-1643685;https://reactome.org/PathwayBrowser/#/R-HSA-168249;https://reactome.org/PathwayBrowser/#/R-HSA-168256;https://reactome.org/PathwayBrowser/#/R-HSA-194315;https://reactome.org/PathwayBrowser/#/R-HSA-195258;https://reactome.org/PathwayBrowser/#/R-…	APICAL JUNCTION	https://www.gsea-msigdb.org/gsea/msigdb/cards/HALLMARK_APICAL_JUNCTION
O15156	212	K	1.58723	Up	Zinc finger and BTB domain-containing protein 7B OS=Homo sapiens OX=9606 GN=ZBTB7B PE=1 SV=2	ZBTB7B	1	0.000137328	98.009	2	AFLQTK(1)GAR	-1.9768	96739	150010	0.775077	1.23023	nucleus	K10494			GO:0000122 negative regulation of transcription by RNA polymerase II; GO:0001775 cell activation; GO:0001816 cytokine production; GO:0001865 NK T cell differentiation; GO:0002376 immune system process; GO:0002520 immune system development; GO:0002521 leukocyte differentiation; GO:0002682 regulation of immune system process; GO:0002683 negative regulation of immune system process; GO:0002684 posit…	GO:0005622 intracellular anatomical structure; GO:0005634 nucleus; GO:0005654 nucleoplasm; GO:0031974 membrane-enclosed lumen; GO:0031981 nuclear lumen; GO:0043226 organelle; GO:0043227 membrane-bounded organelle; GO:0043229 intracellular organelle; GO:0043231 intracellular membrane-bounded organelle; GO:0043233 organelle lumen; GO:0070013 intracellular organelle lumen;	GO:0000976 transcription cis-regulatory region binding; GO:0000977 RNA polymerase II transcription regulatory region sequence-specific DNA binding; GO:0000978 RNA polymerase II cis-regulatory region sequence-specific DNA binding; GO:0000981 DNA-binding transcription factor activity, RNA polymerase II-specific; GO:0000987 cis-regulatory region sequence-specific DNA binding; GO:0001067 transcriptio…	PF00651; PF00096	PF00651 BTB/POZ domain; PF00096 Zinc finger, C2H2 type	R	KOG1721	FOG: Zn-finger	WP2858 ECTODERM DIFFERENTIATION	http://www.wikipathways.org/instance/WP2858_r116763	Transcription factor
O15156	360	K		None	Zinc finger and BTB domain-containing protein 7B OS=Homo sapiens OX=9606 GN=ZBTB7B PE=1 SV=2	ZBTB7B	1	0.0147852	56.014	2	IIHGAGK(1)LPR	1.3374	72946	0	0.988482		nucleus	K10494			GO:0000122 negative regulation of transcription by RNA polymerase II; GO:0001775 cell activation; GO:0001816 cytokine production; GO:0001865 NK T cell differentiation; GO:0002376 immune system process; GO:0002520 immune system development; GO:0002521 leukocyte differentiation; GO:0002682 regulation of immune system process; GO:0002683 negative regulation of immune system process; GO:0002684 posit…	GO:0005622 intracellular anatomical structure; GO:0005634 nucleus; GO:0005654 nucleoplasm; GO:0031974 membrane-enclosed lumen; GO:0031981 nuclear lumen; GO:0043226 organelle; GO:0043227 membrane-bounded organelle; GO:0043229 intracellular organelle; GO:0043231 intracellular membrane-bounded organelle; GO:0043233 organelle lumen; GO:0070013 intracellular organelle lumen;	GO:0000976 transcription cis-regulatory region binding; GO:0000977 RNA polymerase II transcription regulatory region sequence-specific DNA binding; GO:0000978 RNA polymerase II cis-regulatory region sequence-specific DNA binding; GO:0000981 DNA-binding transcription factor activity, RNA polymerase II-specific; GO:0000987 cis-regulatory region sequence-specific DNA binding; GO:0001067 transcriptio…	PF00651; PF00096	PF00651 BTB/POZ domain; PF00096 Zinc finger, C2H2 type	R	KOG1721	FOG: Zn-finger	WP2858 ECTODERM DIFFERENTIATION	http://www.wikipathways.org/instance/WP2858_r116763	Transcription factor
O15156	206	K	1.67707	Up	Zinc finger and BTB domain-containing protein 7B OS=Homo sapiens OX=9606 GN=ZBTB7B PE=1 SV=2	ZBTB7B	1	0.00377755	79.809	2	K(1)AFLQTK	-1.6702	36835	60352	0.749292	1.25662	nucleus	K10494			GO:0000122 negative regulation of transcription by RNA polymerase II; GO:0001775 cell activation; GO:0001816 cytokine production; GO:0001865 NK T cell differentiation; GO:0002376 immune system process; GO:0002520 immune system development; GO:0002521 leukocyte differentiation; GO:0002682 regulation of immune system process; GO:0002683 negative regulation of immune system process; GO:0002684 posit…	GO:0005622 intracellular anatomical structure; GO:0005634 nucleus; GO:0005654 nucleoplasm; GO:0031974 membrane-enclosed lumen; GO:0031981 nuclear lumen; GO:0043226 organelle; GO:0043227 membrane-bounded organelle; GO:0043229 intracellular organelle; GO:0043231 intracellular membrane-bounded organelle; GO:0043233 organelle lumen; GO:0070013 intracellular organelle lumen;	GO:0000976 transcription cis-regulatory region binding; GO:0000977 RNA polymerase II transcription regulatory region sequence-specific DNA binding; GO:0000978 RNA polymerase II cis-regulatory region sequence-specific DNA binding; GO:0000981 DNA-binding transcription factor activity, RNA polymerase II-specific; GO:0000987 cis-regulatory region sequence-specific DNA binding; GO:0001067 transcriptio…	PF00651; PF00096	PF00651 BTB/POZ domain; PF00096 Zinc finger, C2H2 type	R	KOG1721	FOG: Zn-finger	WP2858 ECTODERM DIFFERENTIATION	http://www.wikipathways.org/instance/WP2858_r116763	Transcription factor
O15164	1041	K		None	Transcription intermediary factor 1-alpha OS=Homo sapiens OX=9606 GN=TRIM24 PE=1 SV=3	TRIM24	1	0.00638063	72.492	2	LK(1)SIEER	0.016563	0	16219		0.900573	nucleus	K08881			GO:0000902 cell morphogenesis; GO:0000904 cell morphogenesis involved in differentiation; GO:0006139 nucleobase-containing compound metabolic process; GO:0006325 chromatin organization; GO:0006351 transcription, DNA-templated; GO:0006355 regulation of transcription, DNA-templated; GO:0006366 transcription by RNA polymerase II; GO:0006464 cellular protein modification process; GO:0006468 protein p…	GO:0000228 nuclear chromosome; GO:0000785 chromatin; GO:0000791 euchromatin; GO:0005622 intracellular anatomical structure; GO:0005634 nucleus; GO:0005654 nucleoplasm; GO:0005694 chromosome; GO:0005726 perichromatin fibrils; GO:0005737 cytoplasm; GO:0005829 cytosol; GO:0031974 membrane-enclosed lumen; GO:0031981 nuclear lumen; GO:0043226 organelle; GO:0043227 membrane-bounded organelle; GO:004322…	GO:0000976 transcription cis-regulatory region binding; GO:0000977 RNA polymerase II transcription regulatory region sequence-specific DNA binding; GO:0000978 RNA polymerase II cis-regulatory region sequence-specific DNA binding; GO:0000987 cis-regulatory region sequence-specific DNA binding; GO:0001067 transcription regulatory region nucleic acid binding; GO:0002039 p53 binding; GO:0003676 nucle…	PF00643; PF00628; PF00439	PF00643 B-box zinc finger; PF00628 PHD-finger; PF00439 Bromodomain	O	KOG2177	Predicted E3 ubiquitin ligase			Transcription factor	R-HSA-1226099 Signaling by FGFR in disease;R-HSA-1643685 Disease;R-HSA-1839117 Signaling by cytosolic FGFR1 fusion mutants;R-HSA-1839124 FGFR1 mutant receptor activation;R-HSA-5655302 Signaling by FGFR1 in disease;R-HSA-5663202 Diseases of signal transduction by growth factor receptors and second messengers;R-HSA-6802952 Signaling by BRAF and RAF1 fusions;R-HSA-6802957 Oncogenic MAPK signaling	https://reactome.org/PathwayBrowser/#/R-HSA-1226099;https://reactome.org/PathwayBrowser/#/R-HSA-1643685;https://reactome.org/PathwayBrowser/#/R-HSA-1839117;https://reactome.org/PathwayBrowser/#/R-HSA-1839124;https://reactome.org/PathwayBrowser/#/R-HSA-5655302;https://reactome.org/PathwayBrowser/#/R-HSA-5663202;https://reactome.org/PathwayBrowser/#/R-HSA-6802952;https://reactome.org/PathwayBrowser…
O15212	8	K	1.42822	None	Prefoldin subunit 6 OS=Homo sapiens OX=9606 GN=PFDN6 PE=1 SV=1	PFDN6	1	0.0158585	67.507	2	K(1)LQGEVEK	-0.36901	13476	18438	0.826776	1.18082	cytoplasm	K04798			GO:0006457 protein folding; GO:0009987 cellular process; GO:0016043 cellular component organization; GO:0022607 cellular component assembly; GO:0043933 protein-containing complex organization; GO:0044085 cellular component biogenesis; GO:0051131 chaperone-mediated protein complex assembly; GO:0065003 protein-containing complex assembly; GO:0071840 cellular component organization or biogenesis;	GO:0005622 intracellular anatomical structure; GO:0005634 nucleus; GO:0005737 cytoplasm; GO:0005829 cytosol; GO:0016272 prefoldin complex; GO:0032991 protein-containing complex; GO:0043226 organelle; GO:0043227 membrane-bounded organelle; GO:0043229 intracellular organelle; GO:0043231 intracellular membrane-bounded organelle;	GO:0005488 binding; GO:0005515 protein binding; GO:0051082 unfolded protein binding; GO:0051087 chaperone binding;			O	KOG3478	Prefoldin subunit 6, KE2 family	WP4918 CELLULAR PROTEOSTASIS	http://www.wikipathways.org/instance/WP4918_r117679		R-HSA-389957 Prefoldin mediated transfer of substrate to CCT/TriC;R-HSA-389958 Cooperation of Prefoldin and TriC/CCT in actin and tubulin folding;R-HSA-390466 Chaperonin-mediated protein folding;R-HSA-391251 Protein folding;R-HSA-392499 Metabolism of proteins	https://reactome.org/PathwayBrowser/#/R-HSA-389957;https://reactome.org/PathwayBrowser/#/R-HSA-389958;https://reactome.org/PathwayBrowser/#/R-HSA-390466;https://reactome.org/PathwayBrowser/#/R-HSA-391251;https://reactome.org/PathwayBrowser/#/R-HSA-392499
O15212	21	K	1.21693	None	Prefoldin subunit 6 OS=Homo sapiens OX=9606 GN=PFDN6 PE=1 SV=1	PFDN6	1	0.00127597	57.032	2	YQQLQK(1)DLSK	0.96489	19512	22747	0.904047	1.10016	cytoplasm	K04798			GO:0006457 protein folding; GO:0009987 cellular process; GO:0016043 cellular component organization; GO:0022607 cellular component assembly; GO:0043933 protein-containing complex organization; GO:0044085 cellular component biogenesis; GO:0051131 chaperone-mediated protein complex assembly; GO:0065003 protein-containing complex assembly; GO:0071840 cellular component organization or biogenesis;	GO:0005622 intracellular anatomical structure; GO:0005634 nucleus; GO:0005737 cytoplasm; GO:0005829 cytosol; GO:0016272 prefoldin complex; GO:0032991 protein-containing complex; GO:0043226 organelle; GO:0043227 membrane-bounded organelle; GO:0043229 intracellular organelle; GO:0043231 intracellular membrane-bounded organelle;	GO:0005488 binding; GO:0005515 protein binding; GO:0051082 unfolded protein binding; GO:0051087 chaperone binding;			O	KOG3478	Prefoldin subunit 6, KE2 family	WP4918 CELLULAR PROTEOSTASIS	http://www.wikipathways.org/instance/WP4918_r117679		R-HSA-389957 Prefoldin mediated transfer of substrate to CCT/TriC;R-HSA-389958 Cooperation of Prefoldin and TriC/CCT in actin and tubulin folding;R-HSA-390466 Chaperonin-mediated protein folding;R-HSA-391251 Protein folding;R-HSA-392499 Metabolism of proteins	https://reactome.org/PathwayBrowser/#/R-HSA-389957;https://reactome.org/PathwayBrowser/#/R-HSA-389958;https://reactome.org/PathwayBrowser/#/R-HSA-390466;https://reactome.org/PathwayBrowser/#/R-HSA-391251;https://reactome.org/PathwayBrowser/#/R-HSA-392499
O15226	44	K	1.29816	None	NF-kappa-B-repressing factor OS=Homo sapiens OX=9606 GN=NKRF PE=1 SV=2	NKRF	1	3.17946e-08	134.2	2	HLSTCDGQNPPK(1)K	-0.48824	49730	65005	0.869872	1.12923	nucleus				GO:0006139 nucleobase-containing compound metabolic process; GO:0006351 transcription, DNA-templated; GO:0006355 regulation of transcription, DNA-templated; GO:0006357 regulation of transcription by RNA polymerase II; GO:0006366 transcription by RNA polymerase II; GO:0006725 cellular aromatic compound metabolic process; GO:0006807 nitrogen compound metabolic process; GO:0008152 metabolic process;…	GO:0005622 intracellular anatomical structure; GO:0005634 nucleus; GO:0005730 nucleolus; GO:0031974 membrane-enclosed lumen; GO:0031981 nuclear lumen; GO:0043226 organelle; GO:0043227 membrane-bounded organelle; GO:0043228 non-membrane-bounded organelle; GO:0043229 intracellular organelle; GO:0043231 intracellular membrane-bounded organelle; GO:0043232 intracellular non-membrane-bounded organelle…	GO:0000976 transcription cis-regulatory region binding; GO:0000977 RNA polymerase II transcription regulatory region sequence-specific DNA binding; GO:0000978 RNA polymerase II cis-regulatory region sequence-specific DNA binding; GO:0000981 DNA-binding transcription factor activity, RNA polymerase II-specific; GO:0000987 cis-regulatory region sequence-specific DNA binding; GO:0001067 transcriptio…	PF01424	PF01424 R3H domain	R	KOG1721	FOG: Zn-finger	WP5115 NETWORK MAP OF SARSCOV2 SIGNALING PATHWAY;WP4884 PATHOGENESIS OF SARSCOV2 MEDIATED BY NSP9NSP10 COMPLEX	http://www.wikipathways.org/instance/WP5115_r120597;http://www.wikipathways.org/instance/WP4884_r120646
O15226	234	K	1.78354	Up	NF-kappa-B-repressing factor OS=Homo sapiens OX=9606 GN=NKRF PE=1 SV=2	NKRF	1	0.000339782	84.309	2	K(1)LLTDGYACEVR	-0.45343	26890	48292	0.71781	1.28025	nucleus				GO:0006139 nucleobase-containing compound metabolic process; GO:0006351 transcription, DNA-templated; GO:0006355 regulation of transcription, DNA-templated; GO:0006357 regulation of transcription by RNA polymerase II; GO:0006366 transcription by RNA polymerase II; GO:0006725 cellular aromatic compound metabolic process; GO:0006807 nitrogen compound metabolic process; GO:0008152 metabolic process;…	GO:0005622 intracellular anatomical structure; GO:0005634 nucleus; GO:0005730 nucleolus; GO:0031974 membrane-enclosed lumen; GO:0031981 nuclear lumen; GO:0043226 organelle; GO:0043227 membrane-bounded organelle; GO:0043228 non-membrane-bounded organelle; GO:0043229 intracellular organelle; GO:0043231 intracellular membrane-bounded organelle; GO:0043232 intracellular non-membrane-bounded organelle…	GO:0000976 transcription cis-regulatory region binding; GO:0000977 RNA polymerase II transcription regulatory region sequence-specific DNA binding; GO:0000978 RNA polymerase II cis-regulatory region sequence-specific DNA binding; GO:0000981 DNA-binding transcription factor activity, RNA polymerase II-specific; GO:0000987 cis-regulatory region sequence-specific DNA binding; GO:0001067 transcriptio…	PF01424	PF01424 R3H domain	R	KOG1721	FOG: Zn-finger	WP5115 NETWORK MAP OF SARSCOV2 SIGNALING PATHWAY;WP4884 PATHOGENESIS OF SARSCOV2 MEDIATED BY NSP9NSP10 COMPLEX	http://www.wikipathways.org/instance/WP5115_r120597;http://www.wikipathways.org/instance/WP4884_r120646
O15226	561	K	1.52014	Up	NF-kappa-B-repressing factor OS=Homo sapiens OX=9606 GN=NKRF PE=1 SV=2	NKRF	1	2.67659e-07	118.91	2	K(1)MGWTGGGLGK	0.72195	72615	111150	0.793042	1.20553	nucleus				GO:0006139 nucleobase-containing compound metabolic process; GO:0006351 transcription, DNA-templated; GO:0006355 regulation of transcription, DNA-templated; GO:0006357 regulation of transcription by RNA polymerase II; GO:0006366 transcription by RNA polymerase II; GO:0006725 cellular aromatic compound metabolic process; GO:0006807 nitrogen compound metabolic process; GO:0008152 metabolic process;…	GO:0005622 intracellular anatomical structure; GO:0005634 nucleus; GO:0005730 nucleolus; GO:0031974 membrane-enclosed lumen; GO:0031981 nuclear lumen; GO:0043226 organelle; GO:0043227 membrane-bounded organelle; GO:0043228 non-membrane-bounded organelle; GO:0043229 intracellular organelle; GO:0043231 intracellular membrane-bounded organelle; GO:0043232 intracellular non-membrane-bounded organelle…	GO:0000976 transcription cis-regulatory region binding; GO:0000977 RNA polymerase II transcription regulatory region sequence-specific DNA binding; GO:0000978 RNA polymerase II cis-regulatory region sequence-specific DNA binding; GO:0000981 DNA-binding transcription factor activity, RNA polymerase II-specific; GO:0000987 cis-regulatory region sequence-specific DNA binding; GO:0001067 transcriptio…	PF01424	PF01424 R3H domain	R	KOG1721	FOG: Zn-finger	WP5115 NETWORK MAP OF SARSCOV2 SIGNALING PATHWAY;WP4884 PATHOGENESIS OF SARSCOV2 MEDIATED BY NSP9NSP10 COMPLEX	http://www.wikipathways.org/instance/WP5115_r120597;http://www.wikipathways.org/instance/WP4884_r120646
O15226	50	K		None	NF-kappa-B-repressing factor OS=Homo sapiens OX=9606 GN=NKRF PE=1 SV=2	NKRF	1	0.0174245	60.589	2	QAGSK(1)FHAR	1.3095	18146	0	1.00347		nucleus				GO:0006139 nucleobase-containing compound metabolic process; GO:0006351 transcription, DNA-templated; GO:0006355 regulation of transcription, DNA-templated; GO:0006357 regulation of transcription by RNA polymerase II; GO:0006366 transcription by RNA polymerase II; GO:0006725 cellular aromatic compound metabolic process; GO:0006807 nitrogen compound metabolic process; GO:0008152 metabolic process;…	GO:0005622 intracellular anatomical structure; GO:0005634 nucleus; GO:0005730 nucleolus; GO:0031974 membrane-enclosed lumen; GO:0031981 nuclear lumen; GO:0043226 organelle; GO:0043227 membrane-bounded organelle; GO:0043228 non-membrane-bounded organelle; GO:0043229 intracellular organelle; GO:0043231 intracellular membrane-bounded organelle; GO:0043232 intracellular non-membrane-bounded organelle…	GO:0000976 transcription cis-regulatory region binding; GO:0000977 RNA polymerase II transcription regulatory region sequence-specific DNA binding; GO:0000978 RNA polymerase II cis-regulatory region sequence-specific DNA binding; GO:0000981 DNA-binding transcription factor activity, RNA polymerase II-specific; GO:0000987 cis-regulatory region sequence-specific DNA binding; GO:0001067 transcriptio…	PF01424	PF01424 R3H domain	R	KOG1721	FOG: Zn-finger	WP5115 NETWORK MAP OF SARSCOV2 SIGNALING PATHWAY;WP4884 PATHOGENESIS OF SARSCOV2 MEDIATED BY NSP9NSP10 COMPLEX	http://www.wikipathways.org/instance/WP5115_r120597;http://www.wikipathways.org/instance/WP4884_r120646
O15265	220	K		None	Ataxin-7 OS=Homo sapiens OX=9606 GN=ATXN7 PE=1 SV=1	ATXN7	1	0.00983705	53.051	2	SSSGGVLSASSSSSK(1)LLK	-0.70873	9020.1	0			nucleus	K11318			GO:0000226 microtubule cytoskeleton organization; GO:0003008 system process; GO:0006325 chromatin organization; GO:0006355 regulation of transcription, DNA-templated; GO:0006357 regulation of transcription by RNA polymerase II; GO:0006464 cellular protein modification process; GO:0006508 proteolysis; GO:0006807 nitrogen compound metabolic process; GO:0006996 organelle organization; GO:0006997 nuc…	GO:0005622 intracellular anatomical structure; GO:0005634 nucleus; GO:0005654 nucleoplasm; GO:0005730 nucleolus; GO:0005737 cytoplasm; GO:0005829 cytosol; GO:0005856 cytoskeleton; GO:0015630 microtubule cytoskeleton; GO:0016363 nuclear matrix; GO:0031974 membrane-enclosed lumen; GO:0031981 nuclear lumen; GO:0034399 nuclear periphery; GO:0043226 organelle; GO:0043227 membrane-bounded organelle; GO…	GO:0003682 chromatin binding; GO:0003824 catalytic activity; GO:0005488 binding; GO:0008233 peptidase activity; GO:0008234 cysteine-type peptidase activity; GO:0016787 hydrolase activity; GO:0019783 ubiquitin-like protein-specific protease activity; GO:0101005 deubiquitinase activity; GO:0140096 catalytic activity, acting on a protein;	PF08313	PF08313 SCA7, zinc-binding domain	B	KOG4140	Nuclear protein Ataxin-7				R-HSA-3214847 HATs acetylate histones;R-HSA-3247509 Chromatin modifying enzymes;R-HSA-392499 Metabolism of proteins;R-HSA-4839726 Chromatin organization;R-HSA-5688426 Deubiquitination;R-HSA-5689880 Ub-specific processing proteases;R-HSA-597592 Post-translational protein modification	https://reactome.org/PathwayBrowser/#/R-HSA-3214847;https://reactome.org/PathwayBrowser/#/R-HSA-3247509;https://reactome.org/PathwayBrowser/#/R-HSA-392499;https://reactome.org/PathwayBrowser/#/R-HSA-4839726;https://reactome.org/PathwayBrowser/#/R-HSA-5688426;https://reactome.org/PathwayBrowser/#/R-HSA-5689880;https://reactome.org/PathwayBrowser/#/R-HSA-597592
O15294	16	K	1.39108	None	UDP-N-acetylglucosamine--peptide N-acetylglucosaminyltransferase 110 kDa subunit OS=Homo sapiens OX=9606 GN=OGT PE=1 SV=3	OGT	1	1.19028e-09	126.21	2	ASSVGNVADSTEPTK(1)R	-1.7736	38427	68752	0.81966	1.14022	cytoplasm	K09667	OGT; protein O-GlcNAc transferase [EC:2.4.1.255]	hsa00514 Other types of O-glycan biosynthesis; hsa04931 Insulin resistance	GO:0000003 reproduction; GO:0001678 cellular glucose homeostasis; GO:0001932 regulation of protein phosphorylation; GO:0001933 negative regulation of protein phosphorylation; GO:0001934 positive regulation of protein phosphorylation; GO:0002119 nematode larval development; GO:0002164 larval development; GO:0002237 response to molecule of bacterial origin; GO:0005975 carbohydrate metabolic process…	GO:0000123 histone acetyltransferase complex; GO:0000785 chromatin; GO:0000791 euchromatin; GO:0005622 intracellular anatomical structure; GO:0005634 nucleus; GO:0005654 nucleoplasm; GO:0005694 chromosome; GO:0005737 cytoplasm; GO:0005739 mitochondrion; GO:0005829 cytosol; GO:0005886 plasma membrane; GO:0012505 endomembrane system; GO:0016020 membrane; GO:0030141 secretory granule; GO:0031248 pro…	GO:0003824 catalytic activity; GO:0004721 phosphoprotein phosphatase activity; GO:0004722 protein serine/threonine phosphatase activity; GO:0005488 binding; GO:0005515 protein binding; GO:0005543 phospholipid binding; GO:0005547 phosphatidylinositol-3,4,5-trisphosphate binding; GO:0008080 N-acetyltransferase activity; GO:0008134 transcription factor binding; GO:0008194 UDP-glycosyltransferase act…			GOT	KOG4626	O-linked N-acetylglucosamine transferase OGT	WP3594 CIRCADIAN RHYTHM GENES;WP2858 ECTODERM DIFFERENTIATION;WP5087 MALIGNANT PLEURAL MESOTHELIOMA	http://www.wikipathways.org/instance/WP3594_r117682;http://www.wikipathways.org/instance/WP2858_r116763;http://www.wikipathways.org/instance/WP5087_r120373		R-HSA-3214847 HATs acetylate histones;R-HSA-3247509 Chromatin modifying enzymes;R-HSA-392499 Metabolism of proteins;R-HSA-4839726 Chromatin organization;R-HSA-5213460 RIPK1-mediated regulated necrosis;R-HSA-5218859 Regulated Necrosis;R-HSA-5357801 Programmed Cell Death;R-HSA-5675482 Regulation of necroptotic cell death;R-HSA-5688426 Deubiquitination;R-HSA-5689603 UCH proteinases;R-HSA-597592 Post…	https://reactome.org/PathwayBrowser/#/R-HSA-3214847;https://reactome.org/PathwayBrowser/#/R-HSA-3247509;https://reactome.org/PathwayBrowser/#/R-HSA-392499;https://reactome.org/PathwayBrowser/#/R-HSA-4839726;https://reactome.org/PathwayBrowser/#/R-HSA-5213460;https://reactome.org/PathwayBrowser/#/R-HSA-5218859;https://reactome.org/PathwayBrowser/#/R-HSA-5357801;https://reactome.org/PathwayBrowser/…
O15318	131	K	1.37819	None	DNA-directed RNA polymerase III subunit RPC7 OS=Homo sapiens OX=9606 GN=POLR3G PE=1 SV=2	POLR3G	1	7.72004e-07	98.167	2	DAGK(1)GTPLTNTEDVLK	-1.9682	14971	24558	0.829519	1.14323	nucleus	K03024	RPC7; DNA-directed RNA polymerase III subunit RPC7	hsa04623 Cytosolic DNA-sensing pathway; hsa03020 RNA polymerase	GO:0001817 regulation of cytokine production; GO:0001819 positive regulation of cytokine production; GO:0002682 regulation of immune system process; GO:0002684 positive regulation of immune system process; GO:0006139 nucleobase-containing compound metabolic process; GO:0006351 transcription, DNA-templated; GO:0006355 regulation of transcription, DNA-templated; GO:0006359 regulation of transcripti…	GO:0000428 DNA-directed RNA polymerase complex; GO:0005622 intracellular anatomical structure; GO:0005634 nucleus; GO:0005654 nucleoplasm; GO:0005666 RNA polymerase III complex; GO:0005737 cytoplasm; GO:0005829 cytosol; GO:0030880 RNA polymerase complex; GO:0031974 membrane-enclosed lumen; GO:0031981 nuclear lumen; GO:0032991 protein-containing complex; GO:0043226 organelle; GO:0043227 membrane-b…	GO:0003824 catalytic activity; GO:0003899 DNA-directed 5'-3' RNA polymerase activity; GO:0016740 transferase activity; GO:0016772 transferase activity, transferring phosphorus-containing groups; GO:0016779 nucleotidyltransferase activity; GO:0034062 5'-3' RNA polymerase activity; GO:0097747 RNA polymerase activity; GO:0140098 catalytic activity, acting on RNA;						WP4655 CYTOSOLIC DNASENSING PATHWAY;WP4022 PYRIMIDINE METABOLISM	http://www.wikipathways.org/instance/WP4655_r105163;http://www.wikipathways.org/instance/WP4022_r120306		R-HSA-168249 Innate Immune System;R-HSA-168256 Immune System;R-HSA-1834949 Cytosolic sensors of pathogen-associated DNA ;R-HSA-73780 RNA Polymerase III Chain Elongation;R-HSA-73980 RNA Polymerase III Transcription Termination;R-HSA-74158 RNA Polymerase III Transcription;R-HSA-74160 Gene expression (Transcription);R-HSA-749476 RNA Polymerase III Abortive And Retractive Initiation;R-HSA-76046 RNA P…	https://reactome.org/PathwayBrowser/#/R-HSA-168249;https://reactome.org/PathwayBrowser/#/R-HSA-168256;https://reactome.org/PathwayBrowser/#/R-HSA-1834949;https://reactome.org/PathwayBrowser/#/R-HSA-73780;https://reactome.org/PathwayBrowser/#/R-HSA-73980;https://reactome.org/PathwayBrowser/#/R-HSA-74158;https://reactome.org/PathwayBrowser/#/R-HSA-74160;https://reactome.org/PathwayBrowser/#/R-HSA-7…	MTORC1 SIGNALING	https://www.gsea-msigdb.org/gsea/msigdb/cards/HALLMARK_MTORC1_SIGNALING
O15347	82	K		None	High mobility group protein B3 OS=Homo sapiens OX=9606 GN=HMGB3 PE=1 SV=4	HMGB3	1	0.0240894	47.349	2	DYGPAK(1)GGK	3.3937	98673	0	0.932866		nucleus	K11296			GO:0006139 nucleobase-containing compound metabolic process; GO:0006259 DNA metabolic process; GO:0006310 DNA recombination; GO:0006725 cellular aromatic compound metabolic process; GO:0006807 nitrogen compound metabolic process; GO:0006996 organelle organization; GO:0007275 multicellular organism development; GO:0008152 metabolic process; GO:0009987 cellular process; GO:0016043 cellular componen…		GO:0000217 DNA secondary structure binding; GO:0000400 four-way junction DNA binding; GO:0003676 nucleic acid binding; GO:0003677 DNA binding; GO:0003690 double-stranded DNA binding; GO:0005488 binding; GO:0008301 DNA binding, bending; GO:0097159 organic cyclic compound binding; GO:1901363 heterocyclic compound binding;	PF09011; PF00505	PF09011 HMG-box domain; PF00505 HMG (high mobility group) box	R	KOG0381	HMG box-containing protein						E2F TARGETS;G2M CHECKPOINT	https://www.gsea-msigdb.org/gsea/msigdb/cards/HALLMARK_E2F_TARGETS;https://www.gsea-msigdb.org/gsea/msigdb/cards/HALLMARK_G2M_CHECKPOINT
O15347	76	K	0.86496	None	High mobility group protein B3 OS=Homo sapiens OX=9606 GN=HMGB3 PE=1 SV=4	HMGB3	1	0.00592125	48.157	2	EMK(1)DYGPAK	1.7367	76751	57473	1.06685	0.922783	nucleus	K11296			GO:0006139 nucleobase-containing compound metabolic process; GO:0006259 DNA metabolic process; GO:0006310 DNA recombination; GO:0006725 cellular aromatic compound metabolic process; GO:0006807 nitrogen compound metabolic process; GO:0006996 organelle organization; GO:0007275 multicellular organism development; GO:0008152 metabolic process; GO:0009987 cellular process; GO:0016043 cellular componen…		GO:0000217 DNA secondary structure binding; GO:0000400 four-way junction DNA binding; GO:0003676 nucleic acid binding; GO:0003677 DNA binding; GO:0003690 double-stranded DNA binding; GO:0005488 binding; GO:0008301 DNA binding, bending; GO:0097159 organic cyclic compound binding; GO:1901363 heterocyclic compound binding;	PF09011; PF00505	PF09011 HMG-box domain; PF00505 HMG (high mobility group) box	R	KOG0381	HMG box-containing protein						E2F TARGETS;G2M CHECKPOINT	https://www.gsea-msigdb.org/gsea/msigdb/cards/HALLMARK_E2F_TARGETS;https://www.gsea-msigdb.org/gsea/msigdb/cards/HALLMARK_G2M_CHECKPOINT
O15347	170	K	1.00013	None	High mobility group protein B3 OS=Homo sapiens OX=9606 GN=HMGB3 PE=1 SV=4	HMGB3	1	0.000342857	94.66	2	FDGAK(1)GPAK	0.11425	402960	348900	0.999941	1.00007	nucleus	K11296			GO:0006139 nucleobase-containing compound metabolic process; GO:0006259 DNA metabolic process; GO:0006310 DNA recombination; GO:0006725 cellular aromatic compound metabolic process; GO:0006807 nitrogen compound metabolic process; GO:0006996 organelle organization; GO:0007275 multicellular organism development; GO:0008152 metabolic process; GO:0009987 cellular process; GO:0016043 cellular componen…		GO:0000217 DNA secondary structure binding; GO:0000400 four-way junction DNA binding; GO:0003676 nucleic acid binding; GO:0003677 DNA binding; GO:0003690 double-stranded DNA binding; GO:0005488 binding; GO:0008301 DNA binding, bending; GO:0097159 organic cyclic compound binding; GO:1901363 heterocyclic compound binding;	PF09011; PF00505	PF09011 HMG-box domain; PF00505 HMG (high mobility group) box	R	KOG0381	HMG box-containing protein						E2F TARGETS;G2M CHECKPOINT	https://www.gsea-msigdb.org/gsea/msigdb/cards/HALLMARK_E2F_TARGETS;https://www.gsea-msigdb.org/gsea/msigdb/cards/HALLMARK_G2M_CHECKPOINT
O15347	112	K	1.09654	None	High mobility group protein B3 OS=Homo sapiens OX=9606 GN=HMGB3 PE=1 SV=4	HMGB3	1	1.09651e-09	115.35	2	IK(1)STNPGISIGDVAK	0.22075	43365	41167	0.957123	1.04953	nucleus	K11296			GO:0006139 nucleobase-containing compound metabolic process; GO:0006259 DNA metabolic process; GO:0006310 DNA recombination; GO:0006725 cellular aromatic compound metabolic process; GO:0006807 nitrogen compound metabolic process; GO:0006996 organelle organization; GO:0007275 multicellular organism development; GO:0008152 metabolic process; GO:0009987 cellular process; GO:0016043 cellular componen…		GO:0000217 DNA secondary structure binding; GO:0000400 four-way junction DNA binding; GO:0003676 nucleic acid binding; GO:0003677 DNA binding; GO:0003690 double-stranded DNA binding; GO:0005488 binding; GO:0008301 DNA binding, bending; GO:0097159 organic cyclic compound binding; GO:1901363 heterocyclic compound binding;	PF09011; PF00505	PF09011 HMG-box domain; PF00505 HMG (high mobility group) box	R	KOG0381	HMG box-containing protein						E2F TARGETS;G2M CHECKPOINT	https://www.gsea-msigdb.org/gsea/msigdb/cards/HALLMARK_E2F_TARGETS;https://www.gsea-msigdb.org/gsea/msigdb/cards/HALLMARK_G2M_CHECKPOINT
O15347	30	K		None	High mobility group protein B3 OS=Homo sapiens OX=9606 GN=HMGB3 PE=1 SV=4	HMGB3	1	0.000449873	68.548	2	K(1)NPEVPVNFAEFSK	-0.87138	0	21423		1.07755	nucleus	K11296			GO:0006139 nucleobase-containing compound metabolic process; GO:0006259 DNA metabolic process; GO:0006310 DNA recombination; GO:0006725 cellular aromatic compound metabolic process; GO:0006807 nitrogen compound metabolic process; GO:0006996 organelle organization; GO:0007275 multicellular organism development; GO:0008152 metabolic process; GO:0009987 cellular process; GO:0016043 cellular componen…		GO:0000217 DNA secondary structure binding; GO:0000400 four-way junction DNA binding; GO:0003676 nucleic acid binding; GO:0003677 DNA binding; GO:0003690 double-stranded DNA binding; GO:0005488 binding; GO:0008301 DNA binding, bending; GO:0097159 organic cyclic compound binding; GO:1901363 heterocyclic compound binding;	PF09011; PF00505	PF09011 HMG-box domain; PF00505 HMG (high mobility group) box	R	KOG0381	HMG box-containing protein						E2F TARGETS;G2M CHECKPOINT	https://www.gsea-msigdb.org/gsea/msigdb/cards/HALLMARK_E2F_TARGETS;https://www.gsea-msigdb.org/gsea/msigdb/cards/HALLMARK_G2M_CHECKPOINT
O15347	50	K	1.09726	None	High mobility group protein B3 OS=Homo sapiens OX=9606 GN=HMGB3 PE=1 SV=4	HMGB3	1	0.00908554	53.679	2	WK(1)TMSGK	-0.10128	37748	35858	0.95682	1.04988	nucleus	K11296			GO:0006139 nucleobase-containing compound metabolic process; GO:0006259 DNA metabolic process; GO:0006310 DNA recombination; GO:0006725 cellular aromatic compound metabolic process; GO:0006807 nitrogen compound metabolic process; GO:0006996 organelle organization; GO:0007275 multicellular organism development; GO:0008152 metabolic process; GO:0009987 cellular process; GO:0016043 cellular componen…		GO:0000217 DNA secondary structure binding; GO:0000400 four-way junction DNA binding; GO:0003676 nucleic acid binding; GO:0003677 DNA binding; GO:0003690 double-stranded DNA binding; GO:0005488 binding; GO:0008301 DNA binding, bending; GO:0097159 organic cyclic compound binding; GO:1901363 heterocyclic compound binding;	PF09011; PF00505	PF09011 HMG-box domain; PF00505 HMG (high mobility group) box	R	KOG0381	HMG box-containing protein						E2F TARGETS;G2M CHECKPOINT	https://www.gsea-msigdb.org/gsea/msigdb/cards/HALLMARK_E2F_TARGETS;https://www.gsea-msigdb.org/gsea/msigdb/cards/HALLMARK_G2M_CHECKPOINT
O15355	247	K	1.19723	None	Protein phosphatase 1G OS=Homo sapiens OX=9606 GN=PPM1G PE=1 SV=1	PPM1G	1	1.84867e-24	131.15	3	GTEAGQVGEPGIPTGEAGPSCSSASDK(1)LPR	-1.7986	149990	188500	0.908259	1.0874	nucleus	K17499			GO:0006464 cellular protein modification process; GO:0006470 protein dephosphorylation; GO:0006793 phosphorus metabolic process; GO:0006796 phosphate-containing compound metabolic process; GO:0006807 nitrogen compound metabolic process; GO:0007049 cell cycle; GO:0008152 metabolic process; GO:0009987 cellular process; GO:0016311 dephosphorylation; GO:0019538 protein metabolic process; GO:0022402 c…	GO:0005622 intracellular anatomical structure; GO:0005634 nucleus; GO:0005654 nucleoplasm; GO:0005737 cytoplasm; GO:0031974 membrane-enclosed lumen; GO:0031981 nuclear lumen; GO:0043226 organelle; GO:0043227 membrane-bounded organelle; GO:0043229 intracellular organelle; GO:0043231 intracellular membrane-bounded organelle; GO:0043233 organelle lumen; GO:0070013 intracellular organelle lumen;	GO:0003824 catalytic activity; GO:0004721 phosphoprotein phosphatase activity; GO:0004722 protein serine/threonine phosphatase activity; GO:0016787 hydrolase activity; GO:0016788 hydrolase activity, acting on ester bonds; GO:0016791 phosphatase activity; GO:0042578 phosphoric ester hydrolase activity; GO:0140096 catalytic activity, acting on a protein;			T	KOG0699	Serine/threonine protein phosphatase	WP411 MRNA PROCESSING;WP3888 VEGFAVEGFR2 SIGNALING PATHWAY	http://www.wikipathways.org/instance/WP411_r117160;http://www.wikipathways.org/instance/WP3888_r116782				MYC TARGETS V1	https://www.gsea-msigdb.org/gsea/msigdb/cards/HALLMARK_MYC_TARGETS_V1
O15355	519	K	1.13245	None	Protein phosphatase 1G OS=Homo sapiens OX=9606 GN=PPM1G PE=1 SV=1	PPM1G	1	6.08705e-17	162.21	2	NTAELQPESGK(1)R	-0.91413	58935	70059	0.936476	1.06052	nucleus	K17499			GO:0006464 cellular protein modification process; GO:0006470 protein dephosphorylation; GO:0006793 phosphorus metabolic process; GO:0006796 phosphate-containing compound metabolic process; GO:0006807 nitrogen compound metabolic process; GO:0007049 cell cycle; GO:0008152 metabolic process; GO:0009987 cellular process; GO:0016311 dephosphorylation; GO:0019538 protein metabolic process; GO:0022402 c…	GO:0005622 intracellular anatomical structure; GO:0005634 nucleus; GO:0005654 nucleoplasm; GO:0005737 cytoplasm; GO:0031974 membrane-enclosed lumen; GO:0031981 nuclear lumen; GO:0043226 organelle; GO:0043227 membrane-bounded organelle; GO:0043229 intracellular organelle; GO:0043231 intracellular membrane-bounded organelle; GO:0043233 organelle lumen; GO:0070013 intracellular organelle lumen;	GO:0003824 catalytic activity; GO:0004721 phosphoprotein phosphatase activity; GO:0004722 protein serine/threonine phosphatase activity; GO:0016787 hydrolase activity; GO:0016788 hydrolase activity, acting on ester bonds; GO:0016791 phosphatase activity; GO:0042578 phosphoric ester hydrolase activity; GO:0140096 catalytic activity, acting on a protein;			T	KOG0699	Serine/threonine protein phosphatase	WP411 MRNA PROCESSING;WP3888 VEGFAVEGFR2 SIGNALING PATHWAY	http://www.wikipathways.org/instance/WP411_r117160;http://www.wikipathways.org/instance/WP3888_r116782				MYC TARGETS V1	https://www.gsea-msigdb.org/gsea/msigdb/cards/HALLMARK_MYC_TARGETS_V1
O15357	325	K		None	Phosphatidylinositol 3,4,5-trisphosphate 5-phosphatase 2 OS=Homo sapiens OX=9606 GN=INPPL1 PE=1 SV=2	INPPL1	1	0.000118248	52.837	2	LDVTLGDLTK(1)IGK	-3.0509	19072	0	0.891754		nucleus	K15909	SHIP2; phosphatidylinositol-3,4,5-trisphosphate 5-phosphatase 2 [EC:3.1.3.86]	hsa04666 Fc gamma R-mediated phagocytosis; hsa04070 Phosphatidylinositol signaling system; hsa04662 B cell receptor signaling pathway; hsa00562 Inositol phosphate metabolism; hsa04910 Insulin signaling pathway; hsa01100 Metabolic pathways	GO:0001501 skeletal system development; GO:0001503 ossification; GO:0001932 regulation of protein phosphorylation; GO:0001933 negative regulation of protein phosphorylation; GO:0001958 endochondral ossification; GO:0002253 activation of immune response; GO:0002376 immune system process; GO:0002429 immune response-activating cell surface receptor signaling pathway; GO:0002682 regulation of immune …	GO:0005622 intracellular anatomical structure; GO:0005737 cytoplasm; GO:0005794 Golgi apparatus; GO:0005829 cytosol; GO:0005856 cytoskeleton; GO:0005886 plasma membrane; GO:0012505 endomembrane system; GO:0016020 membrane; GO:0030027 lamellipodium; GO:0030175 filopodium; GO:0031252 cell leading edge; GO:0042995 cell projection; GO:0043226 organelle; GO:0043227 membrane-bounded organelle; GO:00432…	GO:0003824 catalytic activity; GO:0004445 inositol-polyphosphate 5-phosphatase activity; GO:0005488 binding; GO:0005515 protein binding; GO:0005543 phospholipid binding; GO:0005547 phosphatidylinositol-3,4,5-trisphosphate binding; GO:0008289 lipid binding; GO:0016314 phosphatidylinositol-3,4,5-trisphosphate 3-phosphatase activity; GO:0016787 hydrolase activity; GO:0016788 hydrolase activity, acti…	PF00017; PF03372; PF00536	PF00017 SH2 domain; PF03372 Endonuclease/Exonuclease/phosphatase family; PF00536 SAM domain (Sterile alpha motif)	R	KOG4384	Uncharacterized SAM domain protein	WP437 EGFEGFR SIGNALING PATHWAY;WP481 INSULIN SIGNALING	http://www.wikipathways.org/instance/WP437_r120689;http://www.wikipathways.org/instance/WP481_r120562		R-HSA-1280215 Cytokine Signaling in Immune system;R-HSA-1430728 Metabolism;R-HSA-1483249 Inositol phosphate metabolism;R-HSA-1483255 PI Metabolism;R-HSA-1483257 Phospholipid metabolism;R-HSA-1660499 Synthesis of PIPs at the plasma membrane;R-HSA-168256 Immune System;R-HSA-1855204 Synthesis of IP3 and IP4 in the cytosol;R-HSA-449147 Signaling by Interleukins;R-HSA-451927 Interleukin-2 family signa…	https://reactome.org/PathwayBrowser/#/R-HSA-1280215;https://reactome.org/PathwayBrowser/#/R-HSA-1430728;https://reactome.org/PathwayBrowser/#/R-HSA-1483249;https://reactome.org/PathwayBrowser/#/R-HSA-1483255;https://reactome.org/PathwayBrowser/#/R-HSA-1483257;https://reactome.org/PathwayBrowser/#/R-HSA-1660499;https://reactome.org/PathwayBrowser/#/R-HSA-168256;https://reactome.org/PathwayBrowser/…	APICAL JUNCTION	https://www.gsea-msigdb.org/gsea/msigdb/cards/HALLMARK_APICAL_JUNCTION
O15371	142	K	1.37259	None	Eukaryotic translation initiation factor 3 subunit D OS=Homo sapiens OX=9606 GN=EIF3D PE=1 SV=1	EIF3D	1	0.000212481	131.3	2	FQK(1)QFGVR	-0.30196	188940	289620	0.835722	1.1471	cytoplasm	K03251			GO:0001732 formation of cytoplasmic translation initiation complex; GO:0002181 cytoplasmic translation; GO:0002183 cytoplasmic translational initiation; GO:0002191 cap-dependent translational initiation; GO:0006412 translation; GO:0006413 translational initiation; GO:0006417 regulation of translation; GO:0006446 regulation of translational initiation; GO:0006518 peptide metabolic process; GO:0006…	GO:0005622 intracellular anatomical structure; GO:0005634 nucleus; GO:0005737 cytoplasm; GO:0005829 cytosol; GO:0005852 eukaryotic translation initiation factor 3 complex; GO:0032991 protein-containing complex; GO:0043226 organelle; GO:0043227 membrane-bounded organelle; GO:0043229 intracellular organelle; GO:0043231 intracellular membrane-bounded organelle; GO:0071541 eukaryotic translation init…	GO:0000339 RNA cap binding; GO:0003676 nucleic acid binding; GO:0003723 RNA binding; GO:0003729 mRNA binding; GO:0003743 translation initiation factor activity; GO:0005488 binding; GO:0005515 protein binding; GO:0008135 translation factor activity, RNA binding; GO:0097159 organic cyclic compound binding; GO:0098808 mRNA cap binding; GO:1901363 heterocyclic compound binding;			J	KOG2479	Translation initiation factor 3, subunit d (eIF-3d)	WP5027 NSP1 FROM SARSCOV2 INHIBITS TRANSLATION INITIATION IN THE HOST CELL;WP107 TRANSLATION FACTORS;WP3888 VEGFAVEGFR2 SIGNALING PATHWAY	http://www.wikipathways.org/instance/WP5027_r120060;http://www.wikipathways.org/instance/WP107_r117851;http://www.wikipathways.org/instance/WP3888_r116782		R-HSA-156827 L13a-mediated translational silencing of Ceruloplasmin expression;R-HSA-392499 Metabolism of proteins;R-HSA-72613 Eukaryotic Translation Initiation;R-HSA-72649 Translation initiation complex formation;R-HSA-72662 Activation of the mRNA upon binding of the cap-binding complex and eIFs, and subsequent binding to 43S;R-HSA-72689 Formation of a pool of free 40S subunits;R-HSA-72695 Forma…	https://reactome.org/PathwayBrowser/#/R-HSA-156827;https://reactome.org/PathwayBrowser/#/R-HSA-392499;https://reactome.org/PathwayBrowser/#/R-HSA-72613;https://reactome.org/PathwayBrowser/#/R-HSA-72649;https://reactome.org/PathwayBrowser/#/R-HSA-72662;https://reactome.org/PathwayBrowser/#/R-HSA-72689;https://reactome.org/PathwayBrowser/#/R-HSA-72695;https://reactome.org/PathwayBrowser/#/R-HSA-727…	ALLOGRAFT REJECTION;MYC TARGETS V1	https://www.gsea-msigdb.org/gsea/msigdb/cards/HALLMARK_ALLOGRAFT_REJECTION;https://www.gsea-msigdb.org/gsea/msigdb/cards/HALLMARK_MYC_TARGETS_V1
[truncated: 6,592 more rows]
